# Supplementary material for: Omics of an Enigmatic Marine Amoeba Uncovers Unprecedented Gene Trafficking from Giant Viruses and Provides Insights into Its Complex Life Cycle
Source: MDPI journal article supplement (doi:10.3390/microbiolres14020047), 2023-05-18
Supplement: s1 [file s1]

Archive with 4 entries (4 files):
- Figure S1-S8.pdf
- Table_S1_Tricho_COGs_assignment.xlsx
- Table_S2_NEW.xlsx
- Table_S3_NEW.xlsx
