# Supplementary material for: Omics of an Enigmatic Marine Amoeba Uncovers Unprecedented Gene Trafficking from Giant Viruses and Provides Insights into Its Complex Life Cycle
Source: MDPI journal article supplement (doi:10.3390/microbiolres14020047), 2023-05-18
Supplement: s1 [file s1 › Table_S1_Tricho_COGs_assignment.xlsx]

## Sheet: Sheet1
Table 1S. Distribution of the predicted genes of Trichosphaerium draft genome in categories of clusters of orthologous groups of proteins (COGs).
		Function	COGs count
Information, Storage and Processing	J	Translation, ribosomal structure and biogenesis	867
	L	Replication, recombination and repair	820
	K	Transcription	823
	A	RNA processing and modification	539
	B	Chromatin structure and dynamics	236
			3285 / 13.01%
Cellular Processes and Signaling	T	Signal transduction mechanisms	2236
	O	Posttranslational modification, protein turnover, chaperones	1992
	U	Intracellular trafficking, secretion, and vesicular transport	1131
	Z	Cytoskeleton	666
	M	Cell wall/membrane/envelope biogenesis	543
	V	Defense mechanisms	254
	D	Cell cycle control, cell division, chromosome partitioning	186
	N	Cell motility	71
	W	Extracellular structures	50
	Y	Nuclear structure	8
			7137 / 28.27%
Metabolism	G	Carbohydrate transport and metabolism	1198
	I	Lipid transport and metabolism	541
	C	Energy production and conversion	651
	E	Amino acid transport and metabolism	878
	P	Inorganic ion transport and metabolism	545
	Q	Secondary metabolites biosynthesis, transport and catabolism	645
	F	Nucleotide transport and metabolism	220
	H	Coenzyme transport and metabolism	274
			4925 / 19.62%
Poorly Characterized	S	Function unknown	5970
	R	General function prediction only	0
			5970 / 23.65%
