# Supplementary material for: Omics of an Enigmatic Marine Amoeba Uncovers Unprecedented Gene Trafficking from Giant Viruses and Provides Insights into Its Complex Life Cycle
Source: MDPI journal article supplement (doi:10.3390/microbiolres14020047), 2023-05-18
Supplement: s1 [file s1 › Table_S2_NEW.xlsx]

## Sheet: All
Sequence_id	Scaffold_id	Sequence desc.	E-Value	Sequence length	Species	TaxID	Kingdom
TRSP1000.t1	Tricho_longreads_scf.00181_122754	---NA---		95	No Blast Hit
TRSP10000.t1	Tricho_longreads_scf.00004_931448	toxin-antitoxin system YwqK family antitoxin	4.01132e-24	148	Gammaproteobacteria bacterium	1913989	Bacteria		Keys
TRSP10001.t1	Tricho_longreads_scf.00004_931448	toxin-antitoxin system YwqK family antitoxin	1.74329e-24	148	Gammaproteobacteria bacterium	1913989	Bacteria		Eukaryotes
TRSP10002.t1	Tricho_longreads_scf.00004_931448	---NA---		150	No Blast Hit				Bacteria
TRSP10003.t1	Tricho_longreads_scf.00004_931448	hypothetical protein GPECTOR_11g308	1.00531e-05	778	Gonium pectorale	33097	Eukaryota		Archaea
TRSP10004.t1	Tricho_longreads_scf.00004_931448	N-formylglutamate amidohydrolase	2.9124e-49	255	Myxococcales bacterium	2026763	Bacteria		Viruses
TRSP10005.t1	Tricho_longreads_scf.00004_931448	---NA---		788	No Blast Hit
TRSP10006.t1	Tricho_longreads_scf.00004_931448	dual specificity protein phosphatase 1	9.25654e-41	305	Morus notabilis	981085	Eukaryota
TRSP10007.t1	Tricho_longreads_scf.00004_931448	---NA---		93	No Blast Hit
TRSP10008.t1	Tricho_longreads_scf.00004_931448	---NA---		123	No Blast Hit
TRSP10009.t1	Tricho_longreads_scf.00004_931448	---NA---		310	No Blast Hit
TRSP1001.t1	Tricho_longreads_scf.00181_122754	---NA---		162	No Blast Hit
TRSP10010.t1	Tricho_longreads_scf.00004_931448	---NA---		247	No Blast Hit
TRSP10011.t1	Tricho_longreads_scf.00004_931448	unnamed protein product	0	948	Pneumocystis jirovecii	42068	Eukaryota
TRSP10012.t1	Tricho_longreads_scf.00004_931448	---NA---		176	No Blast Hit
TRSP10013.t1	Tricho_longreads_scf.00004_931448	---NA---		114	No Blast Hit
TRSP10014.t1	Tricho_longreads_scf.00004_931448	unnamed protein product	4.59221e-14	209	Dimorphilus gyrociliatus	2664684	Eukaryota
TRSP10015.t1	Tricho_longreads_scf.00004_931448	---NA---		437	No Blast Hit
TRSP10016.t1	Tricho_longreads_scf.00004_931448	hypothetical protein	9.79588e-12	338	Saprospirales bacterium	2026790	Bacteria
TRSP10017.t1	Tricho_longreads_scf.00004_931448	---NA---		209	No Blast Hit
TRSP10018.t1	Tricho_longreads_scf.00004_931448	hypothetical protein DAI22_02g192400	1.6662e-38	440	Oryza sativa Japonica Group	39947	Eukaryota
TRSP10019.t1	Tricho_longreads_scf.00004_931448	hypothetical protein Harvfovirus36_1, partial	1.21155e-35	358	Harvfovirus sp.	2487768	Virus
TRSP1002.t1	Tricho_longreads_scf.00181_122754	---NA---		89	No Blast Hit
TRSP10020.t1	Tricho_longreads_scf.00004_931448	hypothetical protein H310_13736	7.31247e-08	217	Aphanomyces invadans	157072	Eukaryota
TRSP10021.t1	Tricho_longreads_scf.00004_931448	U2AF1 factor	2.51828e-07	717	Sylvia atricapilla	48155	Eukaryota
TRSP10022.t1	Tricho_longreads_scf.00004_931448	hypothetical protein DLAC_10414	5.80674e-54	488	Tieghemostelium lacteum	361077	Eukaryota
TRSP10023.t1	Tricho_longreads_scf.00004_931448	protein piccolo isoform X4	3.65915e-06	926	Nasonia vitripennis	7425	Eukaryota
TRSP10024.t1	Tricho_longreads_scf.00004_931448	leucine-rich repeat-containing protein 40	9.9005e-75	1059	Petromyzon marinus	7757	Eukaryota
TRSP10025.t1	Tricho_longreads_scf.00004_931448	hypothetical protein Harvfovirus20_10	5.76707e-35	348	Harvfovirus sp.	2487768	Virus
TRSP10026.t1	Tricho_longreads_scf.00004_931448	leucine-rich repeat-containing protein	1.72421e-88	1778	Cavenderia fasciculata	261658	Eukaryota
TRSP10027.t1	Tricho_longreads_scf.00004_931448	phytanoyl-CoA dioxygenase	2.18084e-90	293	Hevea brasiliensis	3981	Eukaryota
TRSP10028.t1	Tricho_longreads_scf.00004_931448	uncharacterized protein PTSG_03327	2.1096e-134	425	Salpingoeca rosetta	946362	Eukaryota
TRSP10029.t1	Tricho_longreads_scf.00004_931448	YEATS domain-containing protein 4-like protein	3.70572e-33	217	Dinothrombium tinctorium	1965070	Eukaryota
TRSP1003.t1	Tricho_longreads_scf.00181_122754	hypothetical protein DICPUDRAFT_168758	9.58375e-37	228	Dictyostelium purpureum	5786	Eukaryota
TRSP10030.t1	Tricho_longreads_scf.00004_931448	acetate--CoA ligase	0	685	Dongshaea marina	2047966	Bacteria
TRSP10031.t1	Tricho_longreads_scf.00004_931448	hypothetical protein DFA_11663	6.88697e-12	521	Cavenderia fasciculata	261658	Eukaryota
TRSP10032.t1	Tricho_longreads_scf.00004_931448	---NA---		286	No Blast Hit
TRSP10033.t1	Tricho_longreads_scf.00004_931448	unnamed protein product	2.32187e-32	307	Vitrella brassicaformis CCMP3155	1169540	Eukaryota
TRSP10034.t1	Tricho_longreads_scf.00004_931448	---NA---		426	No Blast Hit
TRSP10035.t1	Tricho_longreads_scf.00004_931448	---NA---		291	No Blast Hit
TRSP10036.t1	Tricho_longreads_scf.00004_931448	hypothetical protein PROFUN_06655	1.19141e-05	444	Planoprotostelium fungivorum	1890364	Eukaryota
TRSP10037.t1	Tricho_longreads_scf.00004_931448	amidohydrolase	1.02197e-83	269	Dehalococcoidia bacterium	2026734	Bacteria
TRSP10038.t1	Tricho_longreads_scf.00004_931448	S8 family peptidase	2.15269e-67	400	Lentzea waywayandensis	84724	Bacteria
TRSP10039.t1	Tricho_longreads_scf.00004_931448	protein NDRG1-A	3.58074e-38	783	Xenopus laevis	8355	Eukaryota
TRSP1004.t1	Tricho_longreads_scf.00181_122754	hypothetical protein	2.18564e-68	522	Armatimonadetes bacterium	2033014	Bacteria
TRSP10040.t1	Tricho_longreads_scf.00004_931448	hypothetical protein CYY_006747	2.24703e-118	318	Polysphondylium violaceum	133409	Eukaryota
TRSP10041.t1	Tricho_longreads_scf.00004_931448	Ferrochelatase, mitochondrial	1.84415e-150	402	Trichoplax sp. H2	287889	Eukaryota
TRSP10042.t1	Tricho_longreads_scf.00004_931448	---NA---		379	No Blast Hit
TRSP10043.t1	Tricho_longreads_scf.00004_931448	protein ERGIC-53	2.25728e-56	614	Cephus cinctus	211228	Eukaryota
TRSP10044.t1	Tricho_longreads_scf.00004_931448	hypothetical protein PROFUN_00377	3.07655e-133	965	Planoprotostelium fungivorum	1890364	Eukaryota
TRSP10045.t1	Tricho_longreads_scf.00004_931448	hypothetical protein CAOG_06009	3.23964e-66	352	Capsaspora owczarzaki ATCC 30864	595528	Eukaryota
TRSP10046.t1	Tricho_longreads_scf.00004_931448	transcriptional activator HAP2-like isoform X3	1.46737e-17	232	Branchiostoma floridae	7739	Eukaryota
TRSP10047.t1	Tricho_longreads_scf.00004_931448	BolA protein	1.36574e-35	139	Thecamonas trahens ATCC 50062	461836	Eukaryota
TRSP10048.t1	Tricho_longreads_scf.00004_931448	hypothetical protein JD969_18520	2.51664e-27	311	Planctomycetes bacterium	2026780	Bacteria
TRSP10049.t1	Tricho_longreads_scf.00004_931448	hypothetical protein	1.46858e-08	346	Scyliorhinus torazame	75743	Eukaryota
TRSP1005.t1	Tricho_longreads_scf.00181_122754	tetratricopeptide repeat domain containing protein	8.6823e-113	1323	Acanthamoeba castellanii str. Neff	1257118	Eukaryota
TRSP10050.t1	Tricho_longreads_scf.00004_931448	---NA---		110	No Blast Hit
TRSP10051.t1	Tricho_longreads_scf.00004_931448	hypothetical protein CYY_006474	4.05468e-08	427	Polysphondylium violaceum	133409	Eukaryota
TRSP10052.t1	Tricho_longreads_scf.00004_931448	DNA helicase MCM9	0	986	Trichoplax sp. H2	287889	Eukaryota
TRSP10053.t1	Tricho_longreads_scf.00004_931448	---NA---		434	No Blast Hit
TRSP10054.t1	Tricho_longreads_scf.00004_931448	---NA---		108	No Blast Hit
TRSP10055.t1	Tricho_longreads_scf.00004_931448	hypothetical protein	0	1344	Deltaproteobacteria bacterium	2026735	Bacteria
TRSP10056.t1	Tricho_longreads_scf.00004_931448	---NA---		323	No Blast Hit
TRSP10057.t1	Tricho_longreads_scf.00004_931448	dehydrogenase/reductase SDR family member 12-like isoform X2	1.22038e-90	321	Anneissia japonica	1529436	Eukaryota
TRSP10058.t1	Tricho_longreads_scf.00004_931448	---NA---		208	No Blast Hit
TRSP10059.t1	Tricho_longreads_scf.00004_931448	Oidioi.mRNA.OKI2018_I69.chr2.g5694.t1.cds	1.24902e-32	124	Oikopleura dioica	34765	Eukaryota
TRSP1006.t1	Tricho_longreads_scf.00181_122754	---NA---		359	No Blast Hit
TRSP10060.t1	Tricho_longreads_scf.00004_931448	hypothetical protein PROFUN_02644	2.7487e-47	612	Planoprotostelium fungivorum	1890364	Eukaryota
TRSP10061.t1	Tricho_longreads_scf.00004_931448	cathepsin A, putative	2.49005e-107	737	Acanthamoeba castellanii str. Neff	1257118	Eukaryota
TRSP10062.t1	Tricho_longreads_scf.00004_931448	hypothetical protein GQ55_2G102500	5.67763e-10	245	Panicum hallii var. hallii	1504633	Eukaryota
TRSP10063.t1	Tricho_longreads_scf.00004_931448	trypsin-like serine protease	1.01111e-15	342	Luteimonas sp. RC10	2587035	Bacteria
TRSP10064.t1	Tricho_longreads_scf.00004_931448	hypothetical protein PRIPAC_90968	0.000152657	257	Pristionchus pacificus	54126	Eukaryota
TRSP10065.t1	Tricho_longreads_scf.00004_931448	unnamed protein product	1.08308e-41	475	Adineta steineri	433720	Eukaryota
TRSP10066.t1	Tricho_longreads_scf.00004_931448	glucose 1-dehydrogenase	2.34967e-117	259	Nostoc sp. NIES-4103	2005458	Bacteria
TRSP10067.t1	Tricho_longreads_scf.00004_931448	hypothetical protein DICPUDRAFT_152069	8.85406e-94	385	Dictyostelium purpureum	5786	Eukaryota
TRSP10068.t1	Tricho_longreads_scf.00004_931448	chitobiosyldiphosphodolichol beta-mannosyltransferase-like protein	3.39468e-89	446	Blastocystis sp. subtype 4	944170	Eukaryota
TRSP10069.t1	Tricho_longreads_scf.00004_931448	hypothetical protein	2.88218e-25	259	Algisphaera agarilytica	1385975	Bacteria
TRSP1007.t1	Tricho_longreads_scf.00181_122754	glutathione S-transferase family protein	4.38226e-37	281	Candidatus Caenarcaniphilales bacterium	2729995	Bacteria
TRSP10070.t1	Tricho_longreads_scf.00004_931448	BTB/POZ domain-containing adapter for CUL3-mediated RhoA degradation protein 3-like	3.3678e-26	559	Stylophora pistillata	50429	Eukaryota
TRSP10071.t1	Tricho_longreads_scf.00004_931448	unnamed protein product	1.6019e-68	363	Peniophora sp. CBMAI 1063	718367	Eukaryota
TRSP10072.t1	Tricho_longreads_scf.00004_931448	---NA---		371	No Blast Hit
TRSP10073.t1	Tricho_longreads_scf.00004_931448	---NA---		270	No Blast Hit
TRSP10074.t1	Tricho_longreads_scf.00004_931448	pleckstrin domain-containing protein	3.8833e-66	1127	Cavenderia fasciculata	261658	Eukaryota
TRSP10075.t1	Tricho_longreads_scf.00004_931448	transporter, major facilitator subfamily protein	1.78454e-93	444	Acanthamoeba castellanii str. Neff	1257118	Eukaryota
TRSP10076.t1	Tricho_longreads_scf.00004_931448	---NA---		395	No Blast Hit
TRSP10077.t1	Tricho_longreads_scf.00004_931448	S-layer homology domain-containing protein	1.49235e-22	713	Anaerolineales bacterium	2073117	Bacteria
TRSP10078.t1	Tricho_longreads_scf.00004_931448	---NA---		88	No Blast Hit
TRSP10079.t1	Tricho_longreads_scf.00004_931448	Transposon Ty3-G Gag-Pol polyprotein	7.76645e-151	1072	Exaiptasia diaphana	2652724	Eukaryota
TRSP1008.t1	Tricho_longreads_scf.00181_122754	---NA---		133	No Blast Hit
TRSP10080.t1	Tricho_longreads_scf.00004_931448	---NA---		404	No Blast Hit
TRSP10081.t1	Tricho_longreads_scf.00004_931448	hypothetical protein DFA_04458	1.81083e-05	199	Cavenderia fasciculata	261658	Eukaryota
TRSP10082.t1	Tricho_longreads_scf.00042_341914	hypothetical protein Mp_zg00560	1.2562e-23	157	Marchantia polymorpha subsp. ruderalis	1480154	Eukaryota
TRSP10083.t1	Tricho_longreads_scf.00042_341914	hypothetical protein SAMD00019534_109600	4.86334e-47	249	Acytostelium subglobosum LB1	1410327	Eukaryota
TRSP10084.t1	Tricho_longreads_scf.00042_341914	protein kinase C1	3.15256e-110	351	Acanthamoeba castellanii	5755	Eukaryota
TRSP10085.t1	Tricho_longreads_scf.00042_341914	---NA---		167	No Blast Hit
TRSP10086.t1	Tricho_longreads_scf.00042_341914	zinc finger with UFM1-specific peptidase domain-like	3.58154e-55	360	Planoprotostelium fungivorum	1890364	Eukaryota
TRSP10087.t1	Tricho_longreads_scf.00042_341914	---NA---		276	No Blast Hit
TRSP10088.t1	Tricho_longreads_scf.00042_341914	RUS1 family protein C16orf58 homolog	3.03128e-98	408	Pocillopora damicornis	46731	Eukaryota
TRSP10089.t1	Tricho_longreads_scf.00042_341914	---NA---		149	No Blast Hit
TRSP1009.t1	Tricho_longreads_scf.00181_122754	hypothetical protein G6F42_020276	2.27711e-08	396	Rhizopus oryzae	64495	Eukaryota
TRSP10090.t1	Tricho_longreads_scf.00042_341914	Serine/threonine-protein kinase PRP4 like protein	3.45871e-79	587	Atta colombica	520822	Eukaryota
TRSP10091.t1	Tricho_longreads_scf.00042_341914	von Willebrand factor type A domain containing protein	0	755	Acanthamoeba castellanii str. Neff	1257118	Eukaryota
TRSP10092.t1	Tricho_longreads_scf.00042_341914	Hypothetical protein PINS_003701	2.22567e-81	588	Pythium insidiosum	114742	Eukaryota
TRSP10093.t1	Tricho_longreads_scf.00042_341914	bifunctional aspartate kinase/homoserine dehydrogenase I	0	914	Longimonas halophila	1469170	Bacteria
TRSP10094.t1	Tricho_longreads_scf.00042_341914	---NA---		469	No Blast Hit
TRSP10095.t1	Tricho_longreads_scf.00042_341914	---NA---		324	No Blast Hit
TRSP10096.t1	Tricho_longreads_scf.00042_341914	recombinase RecA	6.21043e-136	404	Alphaproteobacteria bacterium	1913988	Bacteria
TRSP10097.t1	Tricho_longreads_scf.00042_341914	DNA polymerase I	6.66785e-87	1022	Anaerolineae bacterium	2052143	Bacteria
TRSP10098.t1	Tricho_longreads_scf.00042_341914	hypothetical protein SAMD00019534_080020	1.07146e-25	989	Acytostelium subglobosum LB1	1410327	Eukaryota
TRSP10099.t1	Tricho_longreads_scf.00042_341914	5-methyltetrahydropteroyltriglutamate--homocysteine S-methyltransferase	1.40644e-146	1210	Planoprotostelium fungivorum	1890364	Eukaryota
TRSP1010.t1	Tricho_longreads_scf.00181_122754	---NA---		544	No Blast Hit
TRSP10100.t1	Tricho_longreads_scf.00042_341914	WD-40 repeat-containing protein	7.59233e-43	837	Dictyostelium discoideum AX4	352472	Eukaryota
TRSP10101.t1	Tricho_longreads_scf.00042_341914	succinate dehydrogenase assembly factor 1, mitochondrial-like isoform X2	1.07967e-11	84	Physcomitrium patens	3218	Eukaryota
TRSP10102.t1	Tricho_longreads_scf.00042_341914	BRCT domain-containing protein	4.43535e-176	1040	Cavenderia fasciculata	261658	Eukaryota
TRSP10103.t1	Tricho_longreads_scf.00042_341914	---NA---		455	No Blast Hit
TRSP10104.t1	Tricho_longreads_scf.00042_341914	beta-hexosaminidase 1	1.39923e-105	1384	Nematostella vectensis	45351	Eukaryota
TRSP10105.t1	Tricho_longreads_scf.00042_341914	major vault protein-alpha	0	838	Dictyostelium purpureum	5786	Eukaryota
TRSP10106.t1	Tricho_longreads_scf.00042_341914	E3 ubiquitin-protein ligase UHRF1-like	2.92752e-83	804	Hydra vulgaris	6087	Eukaryota
TRSP10107.t1	Tricho_longreads_scf.00042_341914	trafficking protein particle complex subunit 5	6.86768e-62	192	Vigna unguiculata	3917	Eukaryota
TRSP10108.t1	Tricho_longreads_scf.00042_341914	hypothetical protein K443DRAFT_674047	8.56727e-39	344	Laccaria amethystina LaAM-08-1	1095629	Eukaryota
TRSP10109.t1	Tricho_longreads_scf.00042_341914	early endosome antigen 1	0.000690803	964	Cephus cinctus	211228	Eukaryota
TRSP1011.t1	Tricho_longreads_scf.00181_122754	PLP-dependent aspartate aminotransferase family protein	1.99531e-77	382	Anaeromyxobacter sp. Fw109-5	404589	Bacteria
TRSP10110.t1	Tricho_longreads_scf.00042_341914	MULTISPECIES: cytochrome P450	3.90161e-52	411	Kamptonema sp. PCC 6506	272129	Bacteria
TRSP10111.t1	Tricho_longreads_scf.00042_341914	ACS family MFS transporter	3.07028e-87	469	Deltaproteobacteria bacterium	2026735	Bacteria
TRSP10112.t1	Tricho_longreads_scf.00042_341914	uncharacterized protein C6orf106 homolog	6.79739e-35	247	Bombus terrestris	30195	Eukaryota
TRSP10113.t1	Tricho_longreads_scf.00042_341914	---NA---		254	No Blast Hit
TRSP10114.t1	Tricho_longreads_scf.00042_341914	dihydroxy-acid dehydratase	0	595	Planctomycetaceae bacterium TMED10	1986833	Bacteria
TRSP10115.t1	Tricho_longreads_scf.00042_341914	Sirt6	8.63639e-86	415	Symbiodinium sp. KB8	230985	Eukaryota
TRSP10116.t1	Tricho_longreads_scf.00042_341914	hypothetical protein EGW08_022836	0.000277926	467	Elysia chlorotica	188477	Eukaryota
TRSP10117.t1	Tricho_longreads_scf.00042_341914	oligomeric Golgi complex component 3	1.51677e-127	1240	Klebsormidium nitens	105231	Eukaryota
TRSP10118.t1	Tricho_longreads_scf.00042_341914	---NA---		234	No Blast Hit
TRSP10119.t1	Tricho_longreads_scf.00042_341914	---NA---		117	No Blast Hit
TRSP1012.t1	Tricho_longreads_scf.00181_122754	DUF4215 domain-containing protein	5.89583e-14	444	Candidatus Woesearchaeota archaeon	2026803	Archaea
TRSP10120.t1	Tricho_longreads_scf.00042_341914	hypothetical protein	9.78314e-26	353	Poriferisphaera corsica	2528020	Bacteria
TRSP10121.t1	Tricho_longreads_scf.00042_341914	uncharacterized protein TREMEDRAFT_68261	5.97395e-46	155	Tremella mesenterica DSM 1558	578456	Eukaryota
TRSP10122.t1	Tricho_longreads_scf.00042_341914	hypothetical protein OsI_09694	1.32506e-105	502	Oryza sativa Indica Group	39946	Eukaryota
TRSP10123.t1	Tricho_longreads_scf.00042_341914	BMP family ABC transporter substrate-binding protein	3.73766e-55	682	Anaerolineae bacterium	2052143	Bacteria
TRSP10124.t1	Tricho_longreads_scf.00042_341914	---NA---		158	No Blast Hit
TRSP10125.t1	Tricho_longreads_scf.00042_341914	GTPase-activator protein for Ras family GTPase	1.63866e-19	328	Acanthamoeba castellanii str. Neff	1257118	Eukaryota
TRSP10126.t1	Tricho_longreads_scf.00042_341914	putative mono	3.5249e-36	372	Apostichopus japonicus	307972	Eukaryota
TRSP10127.t1	Tricho_longreads_scf.00042_341914	sodium channel modifier 1	1.17334e-12	651	Nematostella vectensis	45351	Eukaryota
TRSP10128.t1	Tricho_longreads_scf.00042_341914	Ras-like GTPase	4.13714e-71	208	Klosneuvirus KNV1	1977640	Virus
TRSP10129.t1	Tricho_longreads_scf.00042_341914	hypothetical protein AMSG_00841	3.67365e-39	796	Thecamonas trahens ATCC 50062	461836	Eukaryota
TRSP1013.t1	Tricho_longreads_scf.00181_122754	hypothetical protein Harvfovirus34_12	4.64701e-53	379	Harvfovirus sp.	2487768	Virus
TRSP10130.t1	Tricho_longreads_scf.00042_341914	hypothetical protein CYY_000740	6.48982e-38	266	Polysphondylium violaceum	133409	Eukaryota
TRSP10131.t1	Tricho_longreads_scf.00042_341914	1-acyl-sn-glycerol-3-phosphate acyltransferase	9.28472e-58	482	Woeseiaceae bacterium	2026806	Bacteria
TRSP10132.t1	Tricho_longreads_scf.00042_341914	hypothetical protein ACA1_131210	1.53309e-60	497	Acanthamoeba castellanii str. Neff	1257118	Eukaryota
TRSP10133.t1	Tricho_longreads_scf.00042_341914	hypothetical protein Harvfovirus8_11	5.43077e-74	351	Harvfovirus sp.	2487768	Virus
TRSP10134.t1	Tricho_longreads_scf.00042_341914	alpha-actinin A	0	1536	Thecamonas trahens ATCC 50062	461836	Eukaryota
TRSP10135.t1	Tricho_longreads_scf.00042_341914	---NA---		478	No Blast Hit
TRSP10136.t1	Tricho_longreads_scf.00042_341914	RecName: Full=Nicastrin; Short=DpNCT; Flags: Precursor	1.28613e-87	646	Dictyostelium purpureum	5786	Eukaryota
TRSP10137.t1	Tricho_longreads_scf.00042_341914	ribonuclease H-like protein	1.05153e-06	94	Dendrothele bispora CBS 962.96	1314807	Eukaryota
TRSP10138.t1	Tricho_longreads_scf.00042_341914	---NA---		282	No Blast Hit
TRSP10139.t1	Tricho_longreads_scf.00042_341914	ras protein let-60	4.3447e-56	193	Pythium insidiosum	114742	Eukaryota
TRSP1014.t1	Tricho_longreads_scf.00181_122754	hypothetical protein	5.67458e-58	293	Candidatus Omnitrophica bacterium	2035772	Bacteria
TRSP10140.t1	Tricho_longreads_scf.00042_341914	Actinin-type, actin-binding domain-containing protein	2.73758e-73	727	Rozella allomycis CSF55	988480	Eukaryota
TRSP10141.t1	Tricho_longreads_scf.00042_341914	hypothetical protein	6.89593e-38	405	Algibacter aestuarii	912802	Bacteria
TRSP10142.t1	Tricho_longreads_scf.00042_341914	hypothetical protein DFA_10915	1.10348e-56	1032	Cavenderia fasciculata	261658	Eukaryota
TRSP10143.t1	Tricho_longreads_scf.00042_341914	domain found in dishevelled, egl10, and pleckstrin domain containing protein	4.35941e-44	576	Acanthamoeba castellanii str. Neff	1257118	Eukaryota
TRSP10144.t1	Tricho_longreads_scf.00042_341914	RhoGEF domain containing protein	1.33441e-31	541	Acanthamoeba castellanii str. Neff	1257118	Eukaryota
TRSP10145.t1	Tricho_longreads_scf.00042_341914	peroxisomal leader peptide-processing protease	1.92239e-16	552	Denticeps clupeoides	299321	Eukaryota
TRSP10146.t1	Tricho_longreads_scf.00042_341914	---NA---		441	No Blast Hit
TRSP10147.t1	Tricho_longreads_scf.00042_341914	unnamed protein product	1.61e-39	899	Hymenolepis diminuta	6216	Eukaryota
TRSP10148.t1	Tricho_longreads_scf.00042_341914	hypothetical protein PROFUN_04195	1.62674e-53	527	Planoprotostelium fungivorum	1890364	Eukaryota
TRSP10149.t1	Tricho_longreads_scf.00042_341914	RNA polymerase II core subunit	1.79878e-80	307	Dictyostelium discoideum AX4	352472	Eukaryota
TRSP1015.t1	Tricho_longreads_scf.00181_122754	RCC1/BLIP-II, partial	0.000365189	418	Clavulina sp. PMI_390	1486700	Eukaryota
TRSP10150.t1	Tricho_longreads_scf.00042_341914	putative 3-5 exonuclease	1.57784e-28	566	Planoprotostelium fungivorum	1890364	Eukaryota
TRSP10151.t1	Tricho_longreads_scf.00042_341914	Hsp20/alpha crystallin family protein	3.93212e-22	260	Mariprofundus ferrooxydans	314344	Bacteria
TRSP10152.t1	Tricho_longreads_scf.00042_341914	uncharacterized protein SmJEL517_g01457	3.65214e-31	97	Synchytrium microbalum	1806994	Eukaryota
TRSP10153.t1	Tricho_longreads_scf.00042_341914	protein-tyrosine kinase 6-like isoform X2	1.35388e-52	611	Acipenser ruthenus	7906	Eukaryota
TRSP10154.t1	Tricho_longreads_scf.00042_341914	unnamed protein product	1.71266e-57	401	Naegleria fowleri	5763	Eukaryota
TRSP10155.t1	Tricho_longreads_scf.00042_341914	---NA---		364	No Blast Hit
TRSP10156.t1	Tricho_longreads_scf.00042_341914	peptide chain release factor N(5)-glutamine methyltransferase	1.47081e-51	285	Candidatus Nucleicultrix amoebiphila FS5	1414854	Bacteria
TRSP10157.t1	Tricho_longreads_scf.00042_341914	---NA---		131	No Blast Hit
TRSP10158.t1	Tricho_longreads_scf.00042_341914	---NA---		164	No Blast Hit
TRSP10159.t1	Tricho_longreads_scf.00042_341914	nucleoside diphosphate, putative	3.05242e-27	202	Acanthamoeba castellanii str. Neff	1257118	Eukaryota
TRSP1016.t1	Tricho_longreads_scf.00181_122754	enoyl-CoA hydratase/isomerase family protein	2.02323e-82	299	Desulfomonile tiedjei	2358	Bacteria
TRSP10160.t1	Tricho_longreads_scf.00042_341914	hypothetical protein D6D06_00744	1.62977e-07	689	Aureobasidium pullulans	5580	Eukaryota
TRSP10161.t1	Tricho_longreads_scf.00042_341914	peptidase D, putative	6.95278e-170	479	Acanthamoeba castellanii str. Neff	1257118	Eukaryota
TRSP10162.t1	Tricho_longreads_scf.00042_341914	---NA---		178	No Blast Hit
TRSP10163.t1	Tricho_longreads_scf.00042_341914	initiation factor, subunit 2 family protein	2.49252e-114	415	Acanthamoeba castellanii str. Neff	1257118	Eukaryota
TRSP10164.t1	Tricho_longreads_scf.00042_341914	ubiquitin-conjugating enzyme/RWD-like protein	3.15214e-84	171	Glomus cerebriforme	658196	Eukaryota
TRSP10165.t1	Tricho_longreads_scf.00042_341914	hypothetical protein CAPTEDRAFT_120927	1.7022e-146	514	Capitella teleta	283909	Eukaryota
TRSP10166.t1	Tricho_longreads_scf.00042_341914	serine/threonine-protein kinase STY46 isoform X4	9.57913e-41	782	Medicago truncatula	3880	Eukaryota
TRSP10167.t1	Tricho_longreads_scf.00042_341914	hypothetical protein	3.59132e-12	181	Rubinisphaera italica	2527969	Bacteria
TRSP10168.t1	Tricho_longreads_scf.00042_341914	protein kinase domain containing protein	6.46816e-66	559	Acanthamoeba castellanii str. Neff	1257118	Eukaryota
TRSP10169.t1	Tricho_longreads_scf.00042_341914	hypothetical protein DICPUDRAFT_158110	1.06064e-55	296	Dictyostelium purpureum	5786	Eukaryota
TRSP1017.t1	Tricho_longreads_scf.00181_122754	metalloproteinase inhibitor 3-like	6.66486e-13	275	Crassostrea gigas	29159	Eukaryota
TRSP10170.t1	Tricho_longreads_scf.00042_341914	repressor of rna polymerase iii transcription, putative	1.59692e-52	224	Acanthamoeba castellanii str. Neff	1257118	Eukaryota
TRSP10171.t1	Tricho_longreads_scf.00042_341914	hypothetical protein	1.92316e-41	468	Desulfobulbus sp. AH-315-M07	2814557	Bacteria
TRSP10172.t1	Tricho_longreads_scf.00042_341914	uncharacterized protein LOC107616548	5.61068e-14	148	Arachis hypogaea	3818	Eukaryota
TRSP10173.t1	Tricho_longreads_scf.00042_341914	---NA---		346	No Blast Hit
TRSP10174.t1	Tricho_longreads_scf.00042_341914	hypothetical protein DMF84_14610	2.14995e-104	603	Acidobacteria bacterium	1978231	Bacteria
TRSP10175.t1	Tricho_longreads_scf.00042_341914	---NA---		403	No Blast Hit
TRSP10176.t1	Tricho_longreads_scf.00042_341914	Cytochrome b-c1 complex subunit 7	0.00021315	232	Trichoplax sp. H2	287889	Eukaryota
TRSP10177.t1	Tricho_longreads_scf.00042_341914	snf7-family protein	1.60627e-80	197	Dictyostelium purpureum	5786	Eukaryota
TRSP10178.t1	Tricho_longreads_scf.00042_341914	endophilin-A2-like isoform X1	1.70504e-18	352	Trematomus bernacchii	40690	Eukaryota
TRSP10179.t1	Tricho_longreads_scf.00042_341914	30S ribosomal protein S17	9.54711e-09	175	Deltaproteobacteria bacterium	2026735	Bacteria
TRSP1018.t1	Tricho_longreads_scf.00181_122754	---NA---		151	No Blast Hit
TRSP10180.t1	Tricho_longreads_scf.00042_341914	Cysteine protease ATG4D	5.78624e-59	334	Exaiptasia diaphana	2652724	Eukaryota
TRSP10181.t1	Tricho_longreads_scf.00042_341914	toxin-antitoxin system YwqK family antitoxin	3.28445e-28	177	Porphyromonas uenonis	281920	Bacteria
TRSP10182.t1	Tricho_longreads_scf.00042_341914	hypothetical protein PROFUN_03938	3.57666e-61	981	Planoprotostelium fungivorum	1890364	Eukaryota
TRSP10183.t1	Tricho_longreads_scf.00042_341914	Transcriptional adapter ada2	1.7308e-90	778	Dissophora globulifera	979702	Eukaryota
TRSP10184.t1	Tricho_longreads_scf.00042_341914	propionyl-CoA synthetase	0	673	Syntrophobacterales bacterium	2282155	Bacteria
TRSP10185.t1	Tricho_longreads_scf.00042_341914	DNA polymerase I, putative	1.16489e-95	914	Acanthamoeba castellanii str. Neff	1257118	Eukaryota
TRSP10186.t1	Tricho_longreads_scf.00042_341914	hypothetical protein	1.01346e-15	320	Candidatus Omnitrophica bacterium	2035772	Bacteria
TRSP10187.t1	Tricho_longreads_scf.00042_341914	origin recognition complex subunit 5-like protein	1.27312e-36	1582	Piromyces finnis	1754191	Eukaryota
TRSP10188.t1	Tricho_longreads_scf.00042_341914	hypothetical protein	1.48741e-08	362	Lujinxingia litoralis	2211119	Bacteria
TRSP10189.t1	Tricho_longreads_scf.00042_341914	RecName: Full=Thioredoxin reductase SEP1; Short=EhSEP1	0	506	Emiliania huxleyi	2903	Eukaryota
TRSP1019.t1	Tricho_longreads_scf.00181_122754	---NA---		317	No Blast Hit
TRSP10190.t1	Tricho_longreads_scf.00042_341914	unnamed protein product	2.99921e-05	252	Didymodactylos carnosus	1234261	Eukaryota
TRSP10191.t1	Tricho_longreads_scf.00042_341914	hypothetical protein	2.07758e-10	339	Chloroflexi bacterium	2026724	Bacteria
TRSP10192.t1	Tricho_longreads_scf.00042_341914	carboxy-terminal domain RNA polymerase II polypeptide A small phosphatase 1-like	4.01239e-79	258	Acanthochromis polyacanthus	80966	Eukaryota
TRSP10193.t1	Tricho_longreads_scf.00042_341914	40S ribosomal protein S27a	1.84043e-79	156	Acartia pacifica	335913	Eukaryota
TRSP10194.t1	Tricho_longreads_scf.00042_341914	isovaleryl-CoA dehydrogenase	0	436	Persicimonas caeni	2292766	Bacteria
TRSP10195.t1	Tricho_longreads_scf.00042_341914	fragmin A	7.72593e-130	368	Physarum polycephalum	5791	Eukaryota
TRSP10196.t1	Tricho_longreads_scf.00042_341914	hypothetical protein psal_cds_1036	5.47921e-37	231	Pandoravirus salinus	1349410	Virus
TRSP10197.t1	Tricho_longreads_scf.00042_341914	hypothetical protein	1.1789e-49	1068	Gemmataceae bacterium	2052164	Bacteria
TRSP10198.t1	Tricho_longreads_scf.00042_341914	hypothetical protein	1.83506e-06	180	Flavobacteriales bacterium	2021391	Bacteria
TRSP10199.t1	Tricho_longreads_scf.00042_341914	tandem-95 repeat protein	9.98607e-06	287	Okeania sp. SIO3I5	2607805	Bacteria
TRSP1020.t1	Tricho_longreads_scf.00181_122754	hypothetical protein GUITHDRAFT_93934	4.9868e-29	150	Guillardia theta CCMP2712	905079	Eukaryota
TRSP10200.t1	Tricho_longreads_scf.00042_341914	ankyrin repeat protein	2.65543e-42	831	Planoprotostelium fungivorum	1890364	Eukaryota
TRSP10201.t1	Tricho_longreads_scf.00042_341914	homogentisate 1,2dioxygenase	0	439	Acanthamoeba castellanii str. Neff	1257118	Eukaryota
TRSP10202.t1	Tricho_longreads_scf.00042_341914	succinate-CoA ligase (ADP-forming)	0	450	Dictyostelium purpureum	5786	Eukaryota
TRSP10203.t1	Tricho_longreads_scf.00042_341914	hypothetical protein MUCCIDRAFT_183463	5.88116e-58	425	Mucor lusitanicus CBS 277.49	747725	Eukaryota
TRSP10204.t1	Tricho_longreads_scf.00042_341914	hypothetical protein CYY_006644	5.74491e-38	415	Polysphondylium violaceum	133409	Eukaryota
TRSP10205.t1	Tricho_longreads_scf.00042_341914	hypothetical protein PROFUN_09034	1.74605e-51	266	Planoprotostelium fungivorum	1890364	Eukaryota
TRSP10206.t1	Tricho_longreads_scf.00042_341914	---NA---		553	No Blast Hit
TRSP10207.t1	Tricho_longreads_scf.00042_341914	---NA---		153	No Blast Hit
TRSP10208.t1	Tricho_longreads_scf.00042_341914	hypothetical protein SAMD00019534_077790	2.3824e-21	89	Acytostelium subglobosum LB1	1410327	Eukaryota
TRSP10209.t1	Tricho_longreads_scf.00042_341914	DUF11 domain-containing protein	1.26564e-24	605	Lentisphaerae bacterium	1932692	Bacteria
TRSP1021.t1	Tricho_longreads_scf.00181_122754	3-hydroxyanthranilate 3,4-dioxygenase-like isoform X2	2.74749e-88	275	Actinia tenebrosa	6105	Eukaryota
TRSP10210.t1	Tricho_longreads_scf.00042_341914	AAA ATPase afg3	0	789	Entomortierella beljakovae	979673	Eukaryota
TRSP10211.t1	Tricho_longreads_scf.00042_341914	hypothetical protein SAMD00019534_009160	2.2085e-27	419	Acytostelium subglobosum LB1	1410327	Eukaryota
TRSP10212.t1	Tricho_longreads_scf.00042_341914	---NA---		168	No Blast Hit
TRSP10213.t1	Tricho_longreads_scf.00042_341914	hypothetical protein	1.41434e-56	401	Brevifollis gellanilyticus	748831	Bacteria
TRSP10214.t1	Tricho_longreads_scf.00042_341914	30S ribosomal protein S11	7.85959e-08	193	Chloroflexi bacterium	2026724	Bacteria
TRSP10215.t1	Tricho_longreads_scf.00042_341914	glutamine synthetase III	0	731	Planctomycetes bacterium	2026780	Bacteria
TRSP10216.t1	Tricho_longreads_scf.00042_341914	hypothetical protein Hypma_011997	8.57838e-06	255	Hypsizygus marmoreus	39966	Eukaryota
TRSP10217.t1	Tricho_longreads_scf.00042_341914	kynureninase	4.22363e-139	435	Batrachochytrium salamandrivorans	1357716	Eukaryota
TRSP10218.t1	Tricho_longreads_scf.00042_341914	myosin II heavy chain	0	1444	Planoprotostelium fungivorum	1890364	Eukaryota
TRSP10219.t1	Tricho_longreads_scf.00042_341914	Iron/manganese superoxide dismutase	2.43743e-99	231	Helicosporidium sp. ATCC 50920	1291522	Eukaryota
TRSP1022.t1	Tricho_longreads_scf.00181_122754	protein MCM10 homolog isoform X1	2.66366e-22	599	Acipenser ruthenus	7906	Eukaryota
TRSP10220.t1	Tricho_longreads_scf.00042_341914	DUF1649-domain-containing protein	2.80998e-19	198	Rhizophagus clarus	94130	Eukaryota
TRSP10221.t1	Tricho_longreads_scf.00042_341914	hypothetical protein BCR33DRAFT_711555	1.64213e-14	691	Rhizoclosmatium globosum	329046	Eukaryota
TRSP10222.t1	Tricho_longreads_scf.00042_341914	aldehyde dehydrogenase	4.95883e-177	482	Planoprotostelium fungivorum	1890364	Eukaryota
TRSP10223.t1	Tricho_longreads_scf.00042_341914	exocyst complex component Sec10	4.86075e-36	720	Gonapodya prolifera JEL478	1344416	Eukaryota
TRSP1023.t1	Tricho_longreads_scf.00181_122754	---NA---		655	No Blast Hit
TRSP10231.t1	Tricho_longreads_scf.00033_419090	Autophagy protein 22	7.00167e-21	93	Haplosporangium bisporale	1897645	Eukaryota
TRSP10232.t1	Tricho_longreads_scf.00033_419090	hypothetical protein Hyperionvirus5_120	5.46523e-88	451	Hyperionvirus sp.	2487770	Virus
TRSP10233.t1	Tricho_longreads_scf.00033_419090	---NA---		321	No Blast Hit
TRSP10234.t1	Tricho_longreads_scf.00033_419090	hypothetical protein Harvfovirus20_10	4.25842e-80	431	Harvfovirus sp.	2487768	Virus
TRSP10235.t1	Tricho_longreads_scf.00033_419090	protein virilizer homolog	1.12017e-22	1451	Actinia tenebrosa	6105	Eukaryota
TRSP10236.t1	Tricho_longreads_scf.00033_419090	STE20 family protein kinase	3.26155e-59	1730	Tieghemostelium lacteum	361077	Eukaryota
TRSP10237.t1	Tricho_longreads_scf.00033_419090	---NA---		144	No Blast Hit
TRSP10238.t1	Tricho_longreads_scf.00033_419090	ras-related C3 botulinum toxin substrate 1 isoform X2	1.32931e-106	195	Branchiostoma belcheri	7741	Eukaryota
TRSP10239.t1	Tricho_longreads_scf.00033_419090	---NA---		338	No Blast Hit
TRSP1024.t1	Tricho_longreads_scf.00181_122754	Ras GTPase	1.63706e-72	184	Heterostelium album PN500	670386	Eukaryota
TRSP10240.t1	Tricho_longreads_scf.00033_419090	leucine-rich repeat protein	3.55791e-16	443	Pithovirus LCPAC101	2506586	Virus
TRSP10241.t1	Tricho_longreads_scf.00033_419090	hypothetical protein	1.36587e-22	729	Candidatus Brocadiae bacterium	2517210	Bacteria
TRSP10242.t1	Tricho_longreads_scf.00033_419090	hypothetical protein E4U52_006561	5.31865e-07	600	Claviceps spartinae	1294630	Eukaryota
TRSP10243.t1	Tricho_longreads_scf.00033_419090	MORN repeat protein	4.10691e-18	194	Pacmanvirus A23	1932881	Virus
TRSP10244.t1	Tricho_longreads_scf.00033_419090	hypothetical protein SAMD00019534_065790	1.77407e-142	298	Acytostelium subglobosum LB1	1410327	Eukaryota
TRSP10245.t1	Tricho_longreads_scf.00033_419090	dihydroorotase	0	2132	Tieghemostelium lacteum	361077	Eukaryota
TRSP10246.t1	Tricho_longreads_scf.00033_419090	---NA---		631	No Blast Hit
TRSP10247.t1	Tricho_longreads_scf.00033_419090	DUF590 family protein	1.5096e-58	559	Dictyostelium discoideum AX4	352472	Eukaryota
TRSP10248.t1	Tricho_longreads_scf.00033_419090	receptor-type protein kinase, putative	4.07237e-08	433	Bodo saltans	75058	Eukaryota
TRSP10249.t1	Tricho_longreads_scf.00033_419090	glutamine-rich protein 2 isoform X3	3.0298e-23	633	Monodelphis domestica	13616	Eukaryota
TRSP1025.t1	Tricho_longreads_scf.00181_122754	Ras GTPase	4.70546e-71	184	Heterostelium album PN500	670386	Eukaryota
TRSP10250.t1	Tricho_longreads_scf.00033_419090	hypothetical protein	1.65141e-69	701	Deltaproteobacteria bacterium	2026735	Bacteria
TRSP10251.t1	Tricho_longreads_scf.00033_419090	hypothetical protein NAEGRDRAFT_81521	3.1886e-57	211	Naegleria gruberi	5762	Eukaryota
TRSP10252.t1	Tricho_longreads_scf.00033_419090	tetratricopeptide repeat protein 14	1.91422e-26	448	Strigops habroptila	2489341	Eukaryota
TRSP10253.t1	Tricho_longreads_scf.00033_419090	carbohydrate-binding protein	1.40689e-25	520	Trichocoleus sp. FACHB-591	2692872	Bacteria
TRSP10254.t1	Tricho_longreads_scf.00033_419090	---NA---		520	No Blast Hit
TRSP10255.t1	Tricho_longreads_scf.00033_419090	macromolecule metabolism protein	1.16098e-82	574	Rhodanobacter denitrificans	666685	Bacteria
TRSP10256.t1	Tricho_longreads_scf.00033_419090	hypothetical protein CYY_006605	9.68775e-65	734	Polysphondylium violaceum	133409	Eukaryota
TRSP10257.t1	Tricho_longreads_scf.00033_419090	---NA---		104	No Blast Hit
TRSP10258.t1	Tricho_longreads_scf.00033_419090	hypothetical protein BGZ96_008849	8.10894e-151	403	Linnemannia gamsii	64522	Eukaryota
TRSP10259.t1	Tricho_longreads_scf.00033_419090	---NA---		434	No Blast Hit
TRSP1026.t1	Tricho_longreads_scf.00181_122754	ras-like protein	1.03321e-70	186	Coemansia reversa NRRL 1564	763665	Eukaryota
TRSP10260.t1	Tricho_longreads_scf.00033_419090	hypothetical protein CAOG_06009	8.63852e-31	224	Capsaspora owczarzaki ATCC 30864	595528	Eukaryota
TRSP10261.t1	Tricho_longreads_scf.00033_419090	hypothetical protein VD0004_g4087	1.20184e-29	1958	Verticillium dahliae	27337	Eukaryota
TRSP10262.t1	Tricho_longreads_scf.00033_419090	---NA---		348	No Blast Hit
TRSP10263.t1	Tricho_longreads_scf.00033_419090	short-chain dehydrogenase	4.04353e-59	245	Nostoc linckia z6	1628744	Bacteria
TRSP10264.t1	Tricho_longreads_scf.00033_419090	SRPBCC family protein	1.60977e-05	189	Rhodospirillales bacterium	2026786	Bacteria
TRSP10265.t1	Tricho_longreads_scf.00033_419090	uncharacterized protein PTSG_09571	3.74002e-67	176	Salpingoeca rosetta	946362	Eukaryota
TRSP10266.t1	Tricho_longreads_scf.00033_419090	hypothetical protein SAMD00019534_012570, partial	2.41989e-34	849	Acytostelium subglobosum LB1	1410327	Eukaryota
TRSP10267.t1	Tricho_longreads_scf.00033_419090	hypothetical protein FDP41_004902	4.90281e-07	104	Naegleria fowleri	5763	Eukaryota
TRSP10268.t1	Tricho_longreads_scf.00033_419090	---NA---		170	No Blast Hit
TRSP10269.t1	Tricho_longreads_scf.00033_419090	poly [ADP-ribose] polymerase 15-like	6.91082e-41	641	Limulus polyphemus	6850	Eukaryota
TRSP1027.t1	Tricho_longreads_scf.00181_122754	hypothetical protein CYY_007405	5.35836e-79	185	Polysphondylium violaceum	133409	Eukaryota
TRSP10270.t1	Tricho_longreads_scf.00033_419090	hypothetical protein CYY_003112	4.9482e-11	394	Polysphondylium violaceum	133409	Eukaryota
TRSP10271.t1	Tricho_longreads_scf.00033_419090	glutaredoxin 2	2.62968e-25	211	Cardiobacterium hominis	2718	Bacteria
TRSP10272.t1	Tricho_longreads_scf.00033_419090	---NA---		951	No Blast Hit
TRSP10273.t1	Tricho_longreads_scf.00033_419090	hypothetical protein JD969_08465	3.81363e-80	447	Planctomycetes bacterium	2026780	Bacteria
TRSP10274.t1	Tricho_longreads_scf.00033_419090	hypothetical protein H696_00907	1.04521e-88	1463	Fonticula alba	691883	Eukaryota
TRSP10275.t1	Tricho_longreads_scf.00033_419090	TerB family tellurite resistance protein	0.00037639	122	Nodularia sp. NIES-3585	1973477	Bacteria
TRSP10276.t1	Tricho_longreads_scf.00033_419090	F-box domain protein	2.94803e-45	268	Indivirus ILV1	1977633	Virus
TRSP10277.t1	Tricho_longreads_scf.00033_419090	glycoside hydrolase family 38 protein	0	1030	Rhizophagus clarus	94130	Eukaryota
TRSP10278.t1	Tricho_longreads_scf.00033_419090	hypothetical protein INT43_008897	1.35657e-52	177	Umbelopsis isabellina	91625	Eukaryota
TRSP10279.t1	Tricho_longreads_scf.00033_419090	---NA---		463	No Blast Hit
TRSP1028.t1	Tricho_longreads_scf.00181_122754	---NA---		454	No Blast Hit
TRSP10280.t1	Tricho_longreads_scf.00033_419090	TKL protein kinase	5.85714e-41	701	Thecamonas trahens ATCC 50062	461836	Eukaryota
TRSP10281.t1	Tricho_longreads_scf.00033_419090	DEAD/DEAH box helicase domain containing protein	0	811	Acanthamoeba castellanii str. Neff	1257118	Eukaryota
TRSP10282.t1	Tricho_longreads_scf.00033_419090	---NA---		271	No Blast Hit
TRSP10283.t1	Tricho_longreads_scf.00033_419090	Glucosamine-6-phosphate isomerase 1	1.76199e-155	278	Apophysomyces ossiformis	679940	Eukaryota
TRSP10284.t1	Tricho_longreads_scf.00033_419090	Ras family protein	1.66662e-56	187	Trichuris trichiura	36087	Eukaryota
TRSP10285.t1	Tricho_longreads_scf.00033_419090	muts domain V-domain-containing protein	0	1086	Lobosporangium transversale	64571	Eukaryota
TRSP10286.t1	Tricho_longreads_scf.00033_419090	NTPase	8.42766e-25	259	Candidatus Peregrinibacteria bacterium RIFOXYB2_FULL_33_20	1801907	Bacteria
TRSP10287.t1	Tricho_longreads_scf.00033_419090	arl3	3.10759e-14	152	Symbiodinium sp. KB8	230985	Eukaryota
TRSP10288.t1	Tricho_longreads_scf.00033_419090	pre-mRNA-splicing regulator WTAP-like	8.22106e-27	282	Dendronephthya gigantea	151771	Eukaryota
TRSP10289.t1	Tricho_longreads_scf.00033_419090	---NA---		195	No Blast Hit
TRSP1029.t1	Tricho_longreads_scf.00181_122754	P-type ATPase	0	1237	Planoprotostelium fungivorum	1890364	Eukaryota
TRSP10290.t1	Tricho_longreads_scf.00033_419090	hypothetical protein Hyperionvirus5_120	3.05941e-63	344	Hyperionvirus sp.	2487770	Virus
TRSP10291.t1	Tricho_longreads_scf.00033_419090	hypothetical protein BRADI_3g17050v3	8.02355e-37	445	Brachypodium distachyon	15368	Eukaryota
TRSP10292.t1	Tricho_longreads_scf.00033_419090	predicted protein	3.18449e-57	200	Monosiga brevicollis MX1	431895	Eukaryota
TRSP10293.t1	Tricho_longreads_scf.00033_419090	hypothetical protein BFJ66_g16403, partial	1.54652e-07	357	Fusarium oxysporum f. sp. cepae	396571	Eukaryota
TRSP10294.t1	Tricho_longreads_scf.00033_419090	---NA---		705	No Blast Hit
TRSP10295.t1	Tricho_longreads_scf.00033_419090	---NA---		331	No Blast Hit
TRSP10296.t1	Tricho_longreads_scf.00033_419090	---NA---		265	No Blast Hit
TRSP10297.t1	Tricho_longreads_scf.00033_419090	---NA---		150	No Blast Hit
TRSP10298.t1	Tricho_longreads_scf.00033_419090	hypothetical protein	7.08288e-52	641	Desulfobulbus sp. AH-315-M07	2814557	Bacteria
TRSP10299.t1	Tricho_longreads_scf.00033_419090	probable prefoldin subunit 4	1.15569e-21	121	Syzygium oleosum	219896	Eukaryota
TRSP103.t1	Tricho_longreads_scf.03032_4981	---NA---		507	No Blast Hit
TRSP1030.t1	Tricho_longreads_scf.00181_122754	Ras GTPase	2.74804e-79	185	Heterostelium album PN500	670386	Eukaryota
TRSP10300.t1	Tricho_longreads_scf.00033_419090	ubiquitin-conjugating enzyme	2.80181e-77	148	Basidiobolus meristosporus CBS 931.73	1314790	Eukaryota
TRSP10301.t1	Tricho_longreads_scf.00033_419090	RasGEF domain containing protein	1.16353e-108	1044	Acanthamoeba castellanii str. Neff	1257118	Eukaryota
TRSP10302.t1	Tricho_longreads_scf.00033_419090	hypothetical protein A2168_05470	5.70111e-25	667	Planctomycetes bacterium RBG_13_50_24	1801962	Bacteria
TRSP10303.t1	Tricho_longreads_scf.00033_419090	---NA---		126	No Blast Hit
TRSP10304.t1	Tricho_longreads_scf.00033_419090	---NA---		150	No Blast Hit
TRSP10305.t1	Tricho_longreads_scf.00033_419090	hypothetical protein	0.000470697	264	Flavobacteriaceae bacterium	1871037	Bacteria
TRSP10306.t1	Tricho_longreads_scf.00033_419090	hypothetical protein DYB26_001857, partial	7.69993e-24	853	Aphanomyces astaci	112090	Eukaryota
TRSP10307.t1	Tricho_longreads_scf.00033_419090	---NA---		136	No Blast Hit
TRSP10308.t1	Tricho_longreads_scf.00033_419090	hypothetical protein	6.05031e-46	1031	uncultured soil microorganism	1457551
TRSP10309.t1	Tricho_longreads_scf.00033_419090	predicted protein	0	389	Hordeum vulgare subsp. vulgare	112509	Eukaryota
TRSP10310.t1	Tricho_longreads_scf.00033_419090	---NA---		301	No Blast Hit
TRSP10311.t1	Tricho_longreads_scf.00033_419090	---NA---		966	No Blast Hit
TRSP10312.t1	Tricho_longreads_scf.00033_419090	hypothetical protein	1.58173e-09	292	Planctomycetes bacterium	2026780	Bacteria
TRSP10313.t1	Tricho_longreads_scf.00033_419090	2'-5' RNA ligase	1.37644e-25	266	Deltaproteobacteria bacterium RBG_19FT_COMBO_46_12	1797850	Bacteria
TRSP10314.t1	Tricho_longreads_scf.00033_419090	hypothetical protein	1.78021e-24	326	Desulfobulbus sp. AH-315-M07	2814557	Bacteria
TRSP10315.t1	Tricho_longreads_scf.00033_419090	ankyrin repeat-containing protein	1.58721e-122	1117	Dictyostelium discoideum AX4	352472	Eukaryota
TRSP10316.t1	Tricho_longreads_scf.00033_419090	DgyrCDS12153	1.96742e-27	216	Dimorphilus gyrociliatus	2664684	Eukaryota
TRSP10317.t1	Tricho_longreads_scf.00033_419090	heat shock protein Hsp70 family protein	0	662	Cavenderia fasciculata	261658	Eukaryota
TRSP10318.t1	Tricho_longreads_scf.00033_419090	---NA---		1010	No Blast Hit
TRSP10319.t1	Tricho_longreads_scf.00033_419090	GTP-binding ADP-ribosylation factor	3.31457e-139	630	Klebsormidium nitens	105231	Eukaryota
TRSP10320.t1	Tricho_longreads_scf.00033_419090	Cytochrome P450 4C1	4.58936e-56	475	Cryptotermes secundus	105785	Eukaryota
TRSP10321.t1	Tricho_longreads_scf.00033_419090	hypothetical protein	1.92117e-21	850	Bacteroidetes bacterium	1898104	Bacteria
TRSP10322.t1	Tricho_longreads_scf.00033_419090	phosphoenolpyruvate carboxylase kinase 1-like	1.04395e-22	175	Pistacia vera	55513	Eukaryota
TRSP10323.t1	Tricho_longreads_scf.00033_419090	heterogeneous nuclear ribonucleoprotein Q-like	2.50448e-32	550	Physcomitrium patens	3218	Eukaryota
TRSP10324.t1	Tricho_longreads_scf.00033_419090	hypothetical protein	4.17701e-08	601	Burkholderia ubonensis	101571	Bacteria
TRSP10325.t1	Tricho_longreads_scf.00033_419090	dolichyl-diphosphooligosaccharide--protein glycosyltransferase subunit 2	7.09084e-73	673	Plakobranchus ocellatus	259542	Eukaryota
TRSP10326.t1	Tricho_longreads_scf.00033_419090	---NA---		169	No Blast Hit
TRSP10327.t1	Tricho_longreads_scf.00033_419090	hypothetical protein PROFUN_15973	2.78937e-41	333	Planoprotostelium fungivorum	1890364	Eukaryota
TRSP10328.t1	Tricho_longreads_scf.00033_419090	---NA---		177	No Blast Hit
TRSP10329.t1	Tricho_longreads_scf.00033_419090	hypothetical protein RclHR1_25540005	9.6377e-22	783	Rhizophagus clarus	94130	Eukaryota
TRSP10330.t1	Tricho_longreads_scf.00033_419090	proline-serine-threonine phosphatase-interacting 1-like protein	3.85184e-09	88	Labeo rohita	84645	Eukaryota
TRSP10331.t1	Tricho_longreads_scf.00033_419090	AP-1 complex subunit mu-1 isoform X1	3.18277e-120	425	Lytechinus variegatus	7654	Eukaryota
TRSP10332.t1	Tricho_longreads_scf.00033_419090	small GTP-binding protein Rab1, putative	1.11292e-67	201	Trypanosoma brucei brucei TREU927	185431	Eukaryota
TRSP10333.t1	Tricho_longreads_scf.00033_419090	hypothetical protein ACA1_071640	1.24932e-60	523	Acanthamoeba castellanii str. Neff	1257118	Eukaryota
TRSP10334.t1	Tricho_longreads_scf.00033_419090	hypothetical protein C9374_013409	2.59455e-31	484	Naegleria lovaniensis	51637	Eukaryota
TRSP10335.t1	Tricho_longreads_scf.00033_419090	hypothetical protein PROFUN_01053	9.85246e-80	1805	Planoprotostelium fungivorum	1890364	Eukaryota
TRSP10336.t1	Tricho_longreads_scf.00033_419090	cell surface glycoprotein 1-like isoform X1	3.05646e-38	846	Thrips palmi	161013	Eukaryota
TRSP10337.t1	Tricho_longreads_scf.00033_419090	methyltransferase type 12 domain-containing protein	3.01401e-43	328	Cavenderia fasciculata	261658	Eukaryota
TRSP10338.t1	Tricho_longreads_scf.00033_419090	uncharacterized protein LOC116289272	7.08937e-08	312	Actinia tenebrosa	6105	Eukaryota
TRSP10339.t1	Tricho_longreads_scf.00033_419090	alanine--glyoxylate aminotransferase family protein	5.38644e-127	354	Caldilineaceae bacterium	2614250	Bacteria
TRSP10340.t1	Tricho_longreads_scf.00033_419090	hypothetical protein LRAMOSA01393	1.11149e-56	325	Lichtheimia ramosa	688394	Eukaryota
TRSP10341.t1	Tricho_longreads_scf.00033_419090	hypothetical protein CYY_006668	5.26042e-08	125	Polysphondylium violaceum	133409	Eukaryota
TRSP10342.t1	Tricho_longreads_scf.00033_419090	ACrystal Structure of Engineered Protein. Northeast Structural Genomics Consortium Target OR265.	2.46439e-22	156	synthetic construct	32630
TRSP10343.t1	Tricho_longreads_scf.00033_419090	---NA---		306	No Blast Hit
TRSP10344.t1	Tricho_longreads_scf.00033_419090	---NA---		340	No Blast Hit
TRSP10345.t1	Tricho_longreads_scf.00033_419090	A-macroglobulin complement component	6.29348e-154	1745	Planctomycetaceae bacterium	2026779	Bacteria
TRSP10346.t1	Tricho_longreads_scf.00033_419090	ThuA domain-containing protein	6.24311e-30	254	Aquimarina sp. Aq107	1191912	Bacteria
TRSP10347.t1	Tricho_longreads_scf.00033_419090	hypothetical protein GSI_10216	3.15074e-08	232	Ganoderma sinense ZZ0214-1	1077348	Eukaryota
TRSP10348.t1	Tricho_longreads_scf.00033_419090	hypothetical protein	6.67993e-46	534	Phycisphaerales bacterium	2052180	Bacteria
TRSP10349.t1	Tricho_longreads_scf.00033_419090	ubiquinone biosynthesis protein COQ7	5.28356e-43	245	Gammaproteobacteria bacterium	1913989	Bacteria
TRSP10350.t1	Tricho_longreads_scf.00033_419090	---NA---		324	No Blast Hit
TRSP10351.t1	Tricho_longreads_scf.00033_419090	WD40 repeat-like protein	2.15307e-88	1061	Basidiobolus meristosporus CBS 931.73	1314790	Eukaryota
TRSP10352.t1	Tricho_longreads_scf.00033_419090	---NA---		322	No Blast Hit
TRSP10353.t1	Tricho_longreads_scf.00033_419090	hypothetical protein	1.1227e-13	538	Thiofilum flexile	125627	Bacteria
TRSP10354.t1	Tricho_longreads_scf.00033_419090	hypothetical protein	2.75971e-15	459	Trichomonas vaginalis G3	412133	Eukaryota
TRSP10355.t1	Tricho_longreads_scf.00033_419090	protein-L-isoaspartate(D-aspartate) O-methyltransferase	4.03998e-14	279	Candidatus Berkelbacteria bacterium Licking1014_96	2017149	Bacteria
TRSP10356.t1	Tricho_longreads_scf.00033_419090	hypothetical protein TWF679_005032	5.11981e-05	438	Orbilia oligospora	2813651	Eukaryota
TRSP10357.t1	Tricho_longreads_scf.00033_419090	---NA---		68	No Blast Hit
TRSP10358.t1	Tricho_longreads_scf.00033_419090	serine/threonine kinase	7.20557e-56	421	Acanthamoeba castellanii str. Neff	1257118	Eukaryota
TRSP10359.t1	Tricho_longreads_scf.00033_419090	glutathione S-transferase GST-6.0-like isoform X2	6.31547e-20	215	Anneissia japonica	1529436	Eukaryota
TRSP10360.t1	Tricho_longreads_scf.00033_419090	---NA---		151	No Blast Hit
TRSP10361.t1	Tricho_longreads_scf.00033_419090	---NA---		359	No Blast Hit
TRSP10362.t1	Tricho_longreads_scf.00033_419090	---NA---		567	No Blast Hit
TRSP10363.t1	Tricho_longreads_scf.00033_419090	hypothetical protein SAMD00019534_000820	4.84344e-20	473	Acytostelium subglobosum LB1	1410327	Eukaryota
TRSP10364.t1	Tricho_longreads_scf.00033_419090	hypothetical protein ACA1_368220	5.61052e-127	681	Acanthamoeba castellanii str. Neff	1257118	Eukaryota
TRSP10365.t1	Tricho_longreads_scf.00033_419090	---NA---		145	No Blast Hit
TRSP10366.t1	Tricho_longreads_scf.00033_419090	sulfite oxidase	1.02526e-130	367	Betaproteobacteria bacterium	1891241	Bacteria
TRSP10367.t1	Tricho_longreads_scf.00033_419090	T9SS type A sorting domain-containing protein	4.6309e-08	181	Flavobacteriaceae bacterium	1871037	Bacteria
TRSP10368.t1	Tricho_longreads_scf.00033_419090	hypothetical protein DLAC_08803	3.33632e-46	463	Tieghemostelium lacteum	361077	Eukaryota
TRSP10369.t1	Tricho_longreads_scf.00033_419090	signal-induced proliferation-associated 1-like protein 1-like	1.022e-42	708	Planoprotostelium fungivorum	1890364	Eukaryota
TRSP10370.t1	Tricho_longreads_scf.00033_419090	uracil-DNA glycosylase	3.13713e-87	285	Gammaproteobacteria bacterium	1913989	Bacteria
TRSP10371.t1	Tricho_longreads_scf.00033_419090	eukaryotic dna topoisomerase, putative	0	653	Acanthamoeba castellanii str. Neff	1257118	Eukaryota
TRSP10372.t1	Tricho_longreads_scf.00033_419090	hypothetical protein RhiirC2_679582	7.82963e-06	205	Rhizophagus irregularis	588596	Eukaryota
TRSP10373.t1	Tricho_longreads_scf.00033_419090	hypothetical protein H257_05932	0	718	Aphanomyces astaci	112090	Eukaryota
TRSP10374.t1	Tricho_longreads_scf.00033_419090	---NA---		237	No Blast Hit
TRSP10375.t1	Tricho_longreads_scf.00033_419090	---NA---		258	No Blast Hit
TRSP10376.t1	Tricho_longreads_scf.00033_419090	RhoGEF domain containing protein	5.63386e-146	1033	Acanthamoeba castellanii str. Neff	1257118	Eukaryota
TRSP10377.t1	Tricho_longreads_scf.00033_419090	---NA---		136	No Blast Hit
TRSP10378.t1	Tricho_longreads_scf.00033_419090	---NA---		84	No Blast Hit
TRSP10379.t1	Tricho_longreads_scf.00033_419090	FAD-dependent monooxygenase	6.0631e-25	239	Flavobacterium sp. PXU-55	2654843	Bacteria
TRSP10380.t1	Tricho_longreads_scf.00033_419090	FAD-dependent monooxygenase	1.69704e-11	228	Cohnella luojiensis	652876	Bacteria
TRSP10381.t1	Tricho_longreads_scf.00033_419090	GNAT family N-acetyltransferase	3.0921e-42	287	Lewinella cohaerens	70995	Bacteria
TRSP10382.t1	Tricho_longreads_scf.00033_419090	hypothetical protein	7.72665e-21	345	Deltaproteobacteria bacterium	2026735	Bacteria
TRSP10383.t1	Tricho_longreads_scf.00033_419090	MOSC domain-containing protein	9.65949e-52	319	Flavobacterium sufflavum	1921138	Bacteria
TRSP10384.t1	Tricho_longreads_scf.00033_419090	hypothetical protein PROFUN_02723	1.00956e-49	327	Planoprotostelium fungivorum	1890364	Eukaryota
TRSP10385.t1	Tricho_longreads_scf.00033_419090	serine/threonine protein kinase	6.71376e-24	603	Stigonema ocellatum SAG 48.90 = DSM 106950	221294	Bacteria
TRSP10386.t1	Tricho_longreads_scf.00033_419090	hypothetical protein	1.46854e-13	325	Nitrospirae bacterium	2026887	Bacteria
TRSP10387.t1	Tricho_longreads_scf.00033_419090	hypothetical protein DMG06_30290	7.5056e-18	120	Acidobacteria bacterium	1978231	Bacteria
TRSP10388.t1	Tricho_longreads_scf.00033_419090	hypothetical protein ACA1_109760	1.19344e-61	619	Acanthamoeba castellanii str. Neff	1257118	Eukaryota
TRSP10389.t1	Tricho_longreads_scf.00033_419090	carbohydrate-binding protein	5.17381e-26	514	Trichocoleus sp. FACHB-591	2692872	Bacteria
TRSP10390.t1	Tricho_longreads_scf.00033_419090	hypothetical protein H0E87_009896	1.2358e-06	250	Populus deltoides	3696	Eukaryota
TRSP10391.t1	Tricho_longreads_scf.00033_419090	methyltransferase domain-containing protein	3.24103e-43	265	Cyanobacteria bacterium FACHB-472	2692764	Bacteria
TRSP10392.t1	Tricho_longreads_scf.00033_419090	---NA---		162	No Blast Hit
TRSP10393.t1	Tricho_longreads_scf.00033_419090	hypothetical protein	1.30558e-16	502	Dysgonomonas sp. ZJ279	2709796	Bacteria
TRSP104.t1	Tricho_longreads_scf.02193_11478	gelation factor	9.3538e-13	309	Cavenderia fasciculata	261658	Eukaryota
TRSP10423.t1	Tricho_longreads_scf.00138_164325	transmembrane 9 superfamily member 1-like	0	567	Ipomoea triloba	35885	Eukaryota
TRSP10424.t1	Tricho_longreads_scf.00138_164325	hypothetical protein D6725_10755	8.40592e-22	292	Planctomycetes bacterium	2026780	Bacteria
TRSP10425.t1	Tricho_longreads_scf.00138_164325	ras-specific guanine nucleotide-releasing factor 1-like	1.19203e-19	817	Saccoglossus kowalevskii	10224	Eukaryota
TRSP10426.t1	Tricho_longreads_scf.00138_164325	ER lumen proteinretaining receptor-like protein	8.14472e-87	247	Acanthamoeba castellanii str. Neff	1257118	Eukaryota
TRSP10427.t1	Tricho_longreads_scf.00138_164325	hypothetical protein SAMD00019534_041250	1.546e-67	336	Acytostelium subglobosum LB1	1410327	Eukaryota
TRSP10428.t1	Tricho_longreads_scf.00138_164325	---NA---		117	No Blast Hit
TRSP10429.t1	Tricho_longreads_scf.00138_164325	---NA---		160	No Blast Hit
TRSP10430.t1	Tricho_longreads_scf.00138_164325	rap1 GTPase-activating protein 1	3.53316e-50	1139	Columba livia	8932	Eukaryota
TRSP10431.t1	Tricho_longreads_scf.00138_164325	hypothetical protein D6725_10755	2.2328e-34	317	Planctomycetes bacterium	2026780	Bacteria
TRSP10432.t1	Tricho_longreads_scf.00138_164325	---NA---		127	No Blast Hit
TRSP10433.t1	Tricho_longreads_scf.00138_164325	WGR domain-containing protein	9.19547e-132	1902	Myxococcales bacterium	2026763	Bacteria
TRSP10434.t1	Tricho_longreads_scf.00138_164325	hypothetical protein	3.26913e-50	448	Betaproteobacteria bacterium	1891241	Bacteria
TRSP10435.t1	Tricho_longreads_scf.00138_164325	hypothetical protein Harvfovirus3_55	1.02942e-44	306	Harvfovirus sp.	2487768	Virus
TRSP10436.t1	Tricho_longreads_scf.00138_164325	---NA---		466	No Blast Hit
TRSP10437.t1	Tricho_longreads_scf.00138_164325	toxin-antitoxin system YwqK family antitoxin	9.08058e-43	325	Candidatus Thioglobus sp.	2026721	Bacteria
TRSP10438.t1	Tricho_longreads_scf.00138_164325	unnamed protein product	3.9376e-27	598	Adineta steineri	433720	Eukaryota
TRSP10439.t1	Tricho_longreads_scf.00138_164325	hypothetical protein SAMD00019534_065170	1.78465e-46	1217	Acytostelium subglobosum LB1	1410327	Eukaryota
TRSP10440.t1	Tricho_longreads_scf.00138_164325	hypothetical protein D6741_13645	1.98067e-24	414	Planctomycetes bacterium	2026780	Bacteria
TRSP10441.t1	Tricho_longreads_scf.00138_164325	---NA---		176	No Blast Hit
TRSP10442.t1	Tricho_longreads_scf.00138_164325	---NA---		177	No Blast Hit
TRSP10443.t1	Tricho_longreads_scf.00138_164325	---NA---		110	No Blast Hit
TRSP10444.t1	Tricho_longreads_scf.00138_164325	uncharacterized protein PTSG_03465	5.29021e-56	542	Salpingoeca rosetta	946362	Eukaryota
TRSP10445.t1	Tricho_longreads_scf.00138_164325	hypothetical protein BGZ93_009763	4.73968e-32	105	Podila epicladia	979697	Eukaryota
TRSP10446.t1	Tricho_longreads_scf.00138_164325	---NA---		134	No Blast Hit
TRSP10447.t1	Tricho_longreads_scf.00138_164325	hypothetical protein INT44_002440	2.59851e-62	604	Umbelopsis vinacea	44442	Eukaryota
TRSP10448.t1	Tricho_longreads_scf.00138_164325	hypothetical protein AMSG_04040	3.98217e-36	598	Thecamonas trahens ATCC 50062	461836	Eukaryota
TRSP10449.t1	Tricho_longreads_scf.00138_164325	---NA---		220	No Blast Hit
TRSP10450.t1	Tricho_longreads_scf.00138_164325	hypothetical protein JKP88DRAFT_286960	1.31791e-64	431	Tribonema minus	303371	Eukaryota
TRSP10451.t1	Tricho_longreads_scf.00138_164325	hypothetical protein F2P81_003347	9.36364e-08	244	Scophthalmus maximus	52904	Eukaryota
TRSP10452.t1	Tricho_longreads_scf.00138_164325	Cna B-type domain-containing protein	1.01934e-32	484	Clostridia bacterium	2044939	Bacteria
TRSP10453.t1	Tricho_longreads_scf.00138_164325	hypothetical protein pdam_00016959, partial	4.9975e-12	219	Pocillopora damicornis	46731	Eukaryota
TRSP10454.t1	Tricho_longreads_scf.00138_164325	predicted protein	2.10649e-47	358	Monosiga brevicollis MX1	431895	Eukaryota
TRSP10455.t1	Tricho_longreads_scf.00138_164325	---NA---		177	No Blast Hit
TRSP10456.t1	Tricho_longreads_scf.00138_164325	---NA---		177	No Blast Hit
TRSP10457.t1	Tricho_longreads_scf.00138_164325	leucine-rich repeat-containing protein (LRR)	4.99778e-44	438	Tieghemostelium lacteum	361077	Eukaryota
TRSP10458.t1	Tricho_longreads_scf.00138_164325	---NA---		348	No Blast Hit
TRSP10459.t1	Tricho_longreads_scf.00138_164325	predicted protein	3.49904e-48	1798	Naegleria gruberi	5762	Eukaryota
TRSP10460.t1	Tricho_longreads_scf.00138_164325	cell surface receptor IPT/TIG domain-containing protein	3.03025e-13	1220	Planoprotostelium fungivorum	1890364	Eukaryota
TRSP10461.t1	Tricho_longreads_scf.00138_164325	---NA---		296	No Blast Hit
TRSP10462.t1	Tricho_longreads_scf.00138_164325	hypothetical protein Harvfovirus20_10	5.79026e-17	305	Harvfovirus sp.	2487768	Virus
TRSP10463.t1	Tricho_longreads_scf.00138_164325	hypothetical protein PROFUN_03435	3.02734e-87	534	Planoprotostelium fungivorum	1890364	Eukaryota
TRSP10464.t1	Tricho_longreads_scf.00138_164325	phosphatidylserine decarboxylase proenzyme, mitochondrial-like isoform X1	1.31947e-77	507	Actinia tenebrosa	6105	Eukaryota
TRSP10465.t1	Tricho_longreads_scf.00138_164325	---NA---		194	No Blast Hit
TRSP10466.t1	Tricho_longreads_scf.00138_164325	hypothetical protein FNF27_03036	5.12149e-65	460	Cafeteria roenbergensis	33653	Eukaryota
TRSP10467.t1	Tricho_longreads_scf.00138_164325	---NA---		117	No Blast Hit
TRSP10468.t1	Tricho_longreads_scf.00138_164325	nicotinamide-nucleotide adenylyltransferase/ nicotinate-nucleotide adenylyltransferase, putative	1.54188e-31	314	Acanthamoeba castellanii str. Neff	1257118	Eukaryota
TRSP10469.t1	Tricho_longreads_scf.00138_164325	CAMK family protein kinase	1.78507e-49	283	Trichomonas vaginalis G3	412133	Eukaryota
TRSP10470.t1	Tricho_longreads_scf.00138_164325	Rab1B	9.1386e-45	211	Blastocystis sp. ATCC 50177/Nand II	478820	Eukaryota
TRSP10471.t1	Tricho_longreads_scf.00138_164325	alternative oxidase	1.95988e-82	301	Naegleria gruberi	5762	Eukaryota
TRSP10472.t1	Tricho_longreads_scf.00138_164325	---NA---		168	No Blast Hit
TRSP10473.t1	Tricho_longreads_scf.00138_164325	discoidin domain-containing protein	0.000441879	484	Eubacterium ventriosum	39496	Bacteria
TRSP10474.t1	Tricho_longreads_scf.00138_164325	hypothetical protein PROFUN_11354	3.15635e-51	452	Planoprotostelium fungivorum	1890364	Eukaryota
TRSP10475.t1	Tricho_longreads_scf.00138_164325	---NA---		113	No Blast Hit
TRSP10476.t1	Tricho_longreads_scf.00138_164325	---NA---		406	No Blast Hit
TRSP10477.t1	Tricho_longreads_scf.00138_164325	hypothetical protein	2.22421e-56	1386	Alistipes communis	2585118	Bacteria
TRSP10478.t1	Tricho_longreads_scf.00138_164325	hypothetical protein PROFUN_14485	2.04159e-11	266	Planoprotostelium fungivorum	1890364	Eukaryota
TRSP10479.t1	Tricho_longreads_scf.00138_164325	hypothetical protein	4.60957e-26	413	Phycisphaerae bacterium	2026778	Bacteria
TRSP10480.t1	Tricho_longreads_scf.00138_164325	hypothetical protein	3.23658e-10	399	Myxococcales bacterium	2026763	Bacteria
TRSP10481.t1	Tricho_longreads_scf.00138_164325	IPT/TIG domain containing protein	1.86237e-104	819	Acanthamoeba castellanii str. Neff	1257118	Eukaryota
TRSP10482.t1	Tricho_longreads_scf.00138_164325	phytanoyl-CoA dioxygenase family protein	2.53318e-78	283	Mesorhizobium sp. F7	1574409	Bacteria
TRSP10483.t1	Tricho_longreads_scf.00138_164325	D-3-phosphoglycerate dehydrogenase	4.53518e-172	437	Galdieria sulphuraria	130081	Eukaryota
TRSP10484.t1	Tricho_longreads_scf.00138_164325	ADP-ribosylation factor 1-like	1.40898e-107	179	Carassius auratus	7957	Eukaryota
TRSP10485.t1	Tricho_longreads_scf.00138_164325	hypothetical protein K493DRAFT_242055	4.41136e-179	839	Basidiobolus meristosporus CBS 931.73	1314790	Eukaryota
TRSP10486.t1	Tricho_longreads_scf.00138_164325	predicted protein	1.06637e-69	311	Naegleria gruberi	5762	Eukaryota
TRSP10487.t1	Tricho_longreads_scf.00138_164325	---NA---		134	No Blast Hit
TRSP10488.t1	Tricho_longreads_scf.00138_164325	---NA---		133	No Blast Hit
TRSP10489.t1	Tricho_longreads_scf.00138_164325	---NA---		191	No Blast Hit
TRSP10490.t1	Tricho_longreads_scf.00138_164325	Ras-related protein Rab-1A	4.07672e-45	173	Hondaea fermentalgiana	2315210	Eukaryota
TRSP10491.t1	Tricho_longreads_scf.00138_164325	toxin-antitoxin system YwqK family antitoxin	5.06631e-37	313	Dysgonomonas sp. 511	2302930	Bacteria
TRSP10493.t1	Tricho_longreads_scf.03035_4931	---NA---		214	No Blast Hit
TRSP10494.t1	Tricho_longreads_scf.03035_4931	---NA---		199	No Blast Hit
TRSP10495.t1	Tricho_longreads_scf.03035_4931	---NA---		428	No Blast Hit
TRSP10517.t1	Tricho_longreads_scf.00632_25260	---NA---		74	No Blast Hit
TRSP10518.t1	Tricho_longreads_scf.00632_25260	hypothetical protein SAMD00019534_008170	1.3783e-136	3139	Acytostelium subglobosum LB1	1410327	Eukaryota
TRSP10519.t1	Tricho_longreads_scf.00632_25260	---NA---		92	No Blast Hit
TRSP10520.t1	Tricho_longreads_scf.00632_25260	pyridoxal phosphate-dependent transferase	1.03527e-138	397	Gigaspora rosea	44941	Eukaryota
TRSP10521.t1	Tricho_longreads_scf.00632_25260	subunit of heterodimeric actin capping protein cap32/34	7.58996e-88	287	Cavenderia fasciculata	261658	Eukaryota
TRSP10522.t1	Tricho_longreads_scf.00632_25260	hypothetical protein PROFUN_01318	3.86847e-32	622	Planoprotostelium fungivorum	1890364	Eukaryota
TRSP10523.t1	Tricho_longreads_scf.00632_25260	F-box domain protein	3.82853e-20	148	Indivirus ILV1	1977633	Virus
TRSP10524.t1	Tricho_longreads_scf.00632_25260	---NA---		468	No Blast Hit
TRSP10533.t1	Tricho_longreads_scf.00149_154273	---NA---		165	No Blast Hit
TRSP10534.t1	Tricho_longreads_scf.00149_154273	---NA---		201	No Blast Hit
TRSP10535.t1	Tricho_longreads_scf.00149_154273	DUF1232 domain-containing protein	4.85224e-07	113	Spirochaetes bacterium	2202144	Bacteria
TRSP10536.t1	Tricho_longreads_scf.00149_154273	hypothetical protein CYY_008223	8.96241e-36	141	Polysphondylium violaceum	133409	Eukaryota
TRSP10537.t1	Tricho_longreads_scf.00149_154273	---NA---		344	No Blast Hit
TRSP10538.t1	Tricho_longreads_scf.00149_154273	uncharacterized protein LOC110057413	2.64703e-83	436	Orbicella faveolata	48498	Eukaryota
TRSP10539.t1	Tricho_longreads_scf.00149_154273	actin bundling protein	7.04515e-49	246	Acanthamoeba castellanii str. Neff	1257118	Eukaryota
TRSP10540.t1	Tricho_longreads_scf.00149_154273	cytochrome c oxidase subunit 6B2-like isoform X2	2.85043e-05	244	Apis dorsata	7462	Eukaryota
TRSP10541.t1	Tricho_longreads_scf.00149_154273	---NA---		246	No Blast Hit
TRSP10542.t1	Tricho_longreads_scf.00149_154273	antibiotic biosynthesis monooxygenase	7.8136e-18	97	Jinshanibacter zhutongyuii	2498113	Bacteria
TRSP10543.t1	Tricho_longreads_scf.00149_154273	hypothetical protein	5.77424e-84	431	Tupanvirus soda lake	2126985	Virus
TRSP10544.t1	Tricho_longreads_scf.00149_154273	hypothetical protein SPPG_06332	1.70819e-07	652	Spizellomyces punctatus DAOM BR117	645134	Eukaryota
TRSP10545.t1	Tricho_longreads_scf.00149_154273	GTP cyclohydrolase II, putative	8.42148e-56	256	Acanthamoeba castellanii str. Neff	1257118	Eukaryota
TRSP10546.t1	Tricho_longreads_scf.00149_154273	RHS repeat-associated core domain-containing protein	5.25711e-07	207	Desulfuromonadales bacterium	2099678	Bacteria
TRSP10547.t1	Tricho_longreads_scf.00149_154273	hypothetical protein	2.91371e-81	434	Tupanvirus soda lake	2126985	Virus
TRSP10548.t1	Tricho_longreads_scf.00149_154273	antibiotic biosynthesis monooxygenase	7.8136e-18	97	Jinshanibacter zhutongyuii	2498113	Bacteria
TRSP10549.t1	Tricho_longreads_scf.00149_154273	---NA---		246	No Blast Hit
TRSP10550.t1	Tricho_longreads_scf.00149_154273	cytochrome c oxidase subunit 6B2-like isoform X2	4.1091e-05	290	Apis dorsata	7462	Eukaryota
TRSP10551.t1	Tricho_longreads_scf.00149_154273	actin bundling protein	7.04515e-49	246	Acanthamoeba castellanii str. Neff	1257118	Eukaryota
TRSP10552.t1	Tricho_longreads_scf.00149_154273	uncharacterized protein LOC110057413	4.54306e-83	436	Orbicella faveolata	48498	Eukaryota
TRSP10553.t1	Tricho_longreads_scf.00149_154273	---NA---		354	No Blast Hit
TRSP10554.t1	Tricho_longreads_scf.00149_154273	unnamed protein product	2.67402e-23	85	Symbiodinium sp. KB8	230985	Eukaryota
TRSP10555.t1	Tricho_longreads_scf.00149_154273	DUF1232 domain-containing protein	1.12803e-07	113	Spirochaetes bacterium	2202144	Bacteria
TRSP10556.t1	Tricho_longreads_scf.00149_154273	---NA---		129	No Blast Hit
TRSP10557.t1	Tricho_longreads_scf.00149_154273	---NA---		179	No Blast Hit
TRSP10558.t1	Tricho_longreads_scf.00149_154273	protein kinase domain containing protein	9.33423e-53	816	Acanthamoeba castellanii str. Neff	1257118	Eukaryota
TRSP10559.t1	Tricho_longreads_scf.00149_154273	twin-arginine translocation pathway signal protein	3.65345e-28	166	Leisingera sp. ANG-M1	1577895	Bacteria
TRSP10560.t1	Tricho_longreads_scf.00149_154273	hypothetical protein	2.63565e-06	71	Streptomyces sp. Wb2n-11	1030533	Bacteria
TRSP10561.t1	Tricho_longreads_scf.00149_154273	DUF302 domain-containing protein	1.19888e-43	297	Gillisia hiemivivida	291190	Bacteria
TRSP10562.t1	Tricho_longreads_scf.00149_154273	ankyrin repeat domain-containing protein	1.91203e-34	904	Wolbachia endosymbiont of Pentalonia nigronervosa	1301914	Bacteria
TRSP10563.t1	Tricho_longreads_scf.00149_154273	metal dependent phosphohydrolase	7.29645e-49	241	Marseillevirus LCMAC101	2506602	Virus
TRSP10564.t1	Tricho_longreads_scf.00149_154273	---NA---		390	No Blast Hit
TRSP10565.t1	Tricho_longreads_scf.00149_154273	peroxisomal acyl-coenzyme A oxidase 1 isoform X1	1.43419e-156	701	Periophthalmus magnuspinnatus	409849	Eukaryota
TRSP10566.t1	Tricho_longreads_scf.00149_154273	---NA---		409	No Blast Hit
TRSP10567.t1	Tricho_longreads_scf.00149_154273	---NA---		160	No Blast Hit
TRSP10568.t1	Tricho_longreads_scf.00149_154273	---NA---		196	No Blast Hit
TRSP10569.t1	Tricho_longreads_scf.00149_154273	---NA---		158	No Blast Hit
TRSP10570.t1	Tricho_longreads_scf.00149_154273	---NA---		324	No Blast Hit
TRSP10571.t1	Tricho_longreads_scf.00149_154273	hypothetical protein Hyperionvirus5_120	1.60821e-78	523	Hyperionvirus sp.	2487770	Virus
TRSP10572.t1	Tricho_longreads_scf.00149_154273	asparagine synthase (glutamine-hydrolyzing)	0	563	Allomyces macrogynus ATCC 38327	578462	Eukaryota
TRSP10573.t1	Tricho_longreads_scf.00149_154273	hypothetical protein CAOG_07788	6.34474e-43	399	Capsaspora owczarzaki ATCC 30864	595528	Eukaryota
TRSP10574.t1	Tricho_longreads_scf.00149_154273	Metallo-dependent phosphatase	8.37277e-46	666	Basidiobolus meristosporus CBS 931.73	1314790	Eukaryota
TRSP10575.t1	Tricho_longreads_scf.00149_154273	aspartic proteinase-like protein 2 isoform 2	2.58804e-46	430	Planoprotostelium fungivorum	1890364	Eukaryota
TRSP10576.t1	Tricho_longreads_scf.00149_154273	---NA---		457	No Blast Hit
TRSP10577.t1	Tricho_longreads_scf.00149_154273	Fatty acid desaturase, putative	5.27137e-126	461	Acanthamoeba castellanii str. Neff	1257118	Eukaryota
TRSP10578.t1	Tricho_longreads_scf.00149_154273	hypothetical protein PROFUN_08650	1.24341e-157	624	Planoprotostelium fungivorum	1890364	Eukaryota
TRSP10579.t1	Tricho_longreads_scf.00149_154273	signal-induced proliferation-associated 1-like protein 2 isoform X2	2.30115e-54	974	Orbicella faveolata	48498	Eukaryota
TRSP10580.t1	Tricho_longreads_scf.00149_154273	50S ribosomal protein L32	2.8844e-07	129	Caldithrix sp.	1962856	Bacteria
TRSP10581.t1	Tricho_longreads_scf.00149_154273	toxin-antitoxin system YwqK family antitoxin	4.22732e-37	295	Fibrobacter sp. UWB12	1896203	Bacteria
TRSP10582.t1	Tricho_longreads_scf.00149_154273	hypothetical protein Harvfovirus8_11	2.54322e-54	503	Harvfovirus sp.	2487768	Virus
TRSP10583.t1	Tricho_longreads_scf.00149_154273	transcription initiation factor TFIID subunit 3	7.95652e-27	281	Klebsormidium nitens	105231	Eukaryota
TRSP10584.t1	Tricho_longreads_scf.00149_154273	N-alpha-acetyltransferase 60	4.39336e-22	221	Nilaparvata lugens	108931	Eukaryota
TRSP10585.t1	Tricho_longreads_scf.00149_154273	DNA polymerase I	2.14361e-50	350	Alphaproteobacteria bacterium	1913988	Bacteria
TRSP10586.t1	Tricho_longreads_scf.00149_154273	hypothetical protein	5.64849e-44	268	Tupanvirus soda lake	2126985	Virus
TRSP10587.t1	Tricho_longreads_scf.00149_154273	---NA---		96	No Blast Hit
TRSP10588.t1	Tricho_longreads_scf.00149_154273	---NA---		101	No Blast Hit
TRSP10589.t1	Tricho_longreads_scf.00149_154273	---NA---		101	No Blast Hit
TRSP10590.t1	Tricho_longreads_scf.00149_154273	---NA---		96	No Blast Hit
TRSP10591.t1	Tricho_longreads_scf.00149_154273	hypothetical protein	3.29214e-26	322	Planctomycetaceae bacterium	2026779	Bacteria
TRSP10592.t1	Tricho_longreads_scf.00149_154273	T4 RnlA family RNA ligase	6.72408e-27	547	Gloeothece citriformis PCC 7424	65393	Bacteria
TRSP10593.t1	Tricho_longreads_scf.00149_154273	hypothetical protein	5.54755e-13	373	Myroides phaeus	702745	Bacteria
TRSP10594.t1	Tricho_longreads_scf.00149_154273	hypothetical protein C9374_007644	1.84892e-54	449	Naegleria lovaniensis	51637	Eukaryota
TRSP10595.t1	Tricho_longreads_scf.00149_154273	hypothetical protein AMSG_04035	5.7108e-27	799	Thecamonas trahens ATCC 50062	461836	Eukaryota
TRSP10596.t1	Tricho_longreads_scf.00149_154273	C39 family peptidase	4.0977e-13	382	Spirochaetales bacterium	2026792	Bacteria
TRSP10597.t1	Tricho_longreads_scf.00149_154273	---NA---		593	No Blast Hit
TRSP10598.t1	Tricho_longreads_scf.00149_154273	toxin-antitoxin system YwqK family antitoxin	1.48353e-15	193	Desulfovibrio litoralis DSM 11393	1121455	Bacteria
TRSP10599.t1	Tricho_longreads_scf.00149_154273	hypothetical protein	3.19324e-77	541	Tupanvirus soda lake	2126985	Virus
TRSP10600.t1	Tricho_longreads_scf.00149_154273	predicted protein	7.47447e-174	714	Monosiga brevicollis MX1	431895	Eukaryota
TRSP10601.t1	Tricho_longreads_scf.00149_154273	---NA---		113	No Blast Hit
TRSP10602.t1	Tricho_longreads_scf.00149_154273	toxin-antitoxin system YwqK family antitoxin	2.87123e-32	466	Lutibacter agarilyticus	1109740	Bacteria
TRSP10603.t1	Tricho_longreads_scf.00149_154273	hypothetical protein CYY_006228	4.84411e-55	1055	Polysphondylium violaceum	133409	Eukaryota
TRSP10604.t1	Tricho_longreads_scf.00149_154273	YbhB/YbcL family Raf kinase inhibitor-like protein	1.65314e-16	187	Legionella sp.	459	Bacteria
TRSP10605.t1	Tricho_longreads_scf.00149_154273	S9 family peptidase	0	709	Calditrichaeota bacterium	2212469	Bacteria
TRSP10606.t1	Tricho_longreads_scf.00149_154273	hypothetical protein PROFUN_05571	3.2431e-43	999	Planoprotostelium fungivorum	1890364	Eukaryota
TRSP10607.t1	Tricho_longreads_scf.00149_154273	---NA---		113	No Blast Hit
TRSP10656.t1	Tricho_longreads_scf.00078_262981	DNA topoisomerase 2-like	0	1251	Dioscorea cayenensis subsp. rotundata	55577	Eukaryota
TRSP10657.t1	Tricho_longreads_scf.00078_262981	---NA---		237	No Blast Hit
TRSP10658.t1	Tricho_longreads_scf.00078_262981	Vps13c	1.46976e-29	340	Symbiodinium necroappetens	1628268	Eukaryota
TRSP10659.t1	Tricho_longreads_scf.00078_262981	ras-related protein O-Krev	2.49544e-55	184	Oryzias latipes	8090	Eukaryota
TRSP10660.t1	Tricho_longreads_scf.00078_262981	Brefeldin A-inhibited guanine nucleotide-exchange protein 1	3.92853e-24	332	Perkinsus chesapeaki	330153	Eukaryota
TRSP10661.t1	Tricho_longreads_scf.00078_262981	---NA---		404	No Blast Hit
TRSP10662.t1	Tricho_longreads_scf.00078_262981	---NA---		368	No Blast Hit
TRSP10663.t1	Tricho_longreads_scf.00078_262981	ankyrin repeat protein	6.18323e-09	397	Moumouvirus australiensis	2109587	Virus
TRSP10664.t1	Tricho_longreads_scf.00078_262981	F-box domain protein	1.90442e-15	187	Indivirus ILV1	1977633	Virus
TRSP10665.t1	Tricho_longreads_scf.00078_262981	gelation factor, putative	4.90931e-24	1554	Acanthamoeba castellanii str. Neff	1257118	Eukaryota
TRSP10666.t1	Tricho_longreads_scf.00078_262981	ras-like protein	1.8562e-56	204	Crucibulum laeve	68775	Eukaryota
TRSP10667.t1	Tricho_longreads_scf.00078_262981	toxin-antitoxin system YwqK family antitoxin	2.06314e-18	672	Fusobacterium hwasookii ChDC F174	1307442	Bacteria
TRSP10668.t1	Tricho_longreads_scf.00078_262981	---NA---		227	No Blast Hit
TRSP10669.t1	Tricho_longreads_scf.00078_262981	toxin-antitoxin system YwqK family antitoxin	1.98459e-33	308	Fibrobacter sp.	35828	Bacteria
TRSP10670.t1	Tricho_longreads_scf.00078_262981	---NA---		153	No Blast Hit
TRSP10671.t1	Tricho_longreads_scf.00078_262981	---NA---		508	No Blast Hit
TRSP10672.t1	Tricho_longreads_scf.00078_262981	---NA---		165	No Blast Hit
TRSP10673.t1	Tricho_longreads_scf.00078_262981	toxin-antitoxin system YwqK family antitoxin	1.42241e-34	307	Seonamhaeicola aphaedonensis	1461338	Bacteria
TRSP10674.t1	Tricho_longreads_scf.00078_262981	hypothetical protein CMQ_3643	2.1045e-14	116	Grosmannia clavigera kw1407	655863	Eukaryota
TRSP10675.t1	Tricho_longreads_scf.00078_262981	---NA---		289	No Blast Hit
TRSP10676.t1	Tricho_longreads_scf.00078_262981	unnamed protein product	1.87703e-07	206	Rotaria socialis	392032	Eukaryota
TRSP10677.t1	Tricho_longreads_scf.00078_262981	---NA---		305	No Blast Hit
TRSP10678.t1	Tricho_longreads_scf.00078_262981	uncharacterized protein SmJEL517_g02799	2.32303e-68	639	Synchytrium microbalum	1806994	Eukaryota
TRSP10679.t1	Tricho_longreads_scf.00078_262981	hypothetical protein Harvfovirus20_10	7.282e-62	433	Harvfovirus sp.	2487768	Virus
TRSP10680.t1	Tricho_longreads_scf.00078_262981	toxin-antitoxin system YwqK family antitoxin	2.53575e-09	140	Pseudomonadales bacterium	1891229	Bacteria
TRSP10681.t1	Tricho_longreads_scf.00078_262981	hypothetical protein A3759_13980	4.17162e-39	353	Thalassolituus sp. HI0120	1822263	Bacteria
TRSP10682.t1	Tricho_longreads_scf.00078_262981	oligopeptide transporter, OPT family	3.6899e-153	804	Betaproteobacteria bacterium RIFCSPLOWO2_12_FULL_63_13	1797498	Bacteria
TRSP10683.t1	Tricho_longreads_scf.00078_262981	BTB/POZ domain-containing protein KCTD21-like	3.7943e-25	373	Stylophora pistillata	50429	Eukaryota
TRSP10684.t1	Tricho_longreads_scf.00078_262981	---NA---		490	No Blast Hit
TRSP10685.t1	Tricho_longreads_scf.00078_262981	dual oxidase	8.56322e-60	758	Kaumoebavirus	1859492	Virus
TRSP10686.t1	Tricho_longreads_scf.00078_262981	hypothetical protein Harvfovirus20_10	7.38903e-45	494	Harvfovirus sp.	2487768	Virus
TRSP10687.t1	Tricho_longreads_scf.00078_262981	---NA---		223	No Blast Hit
TRSP10688.t1	Tricho_longreads_scf.00078_262981	hypothetical protein Harvfovirus20_10	2.29689e-58	446	Harvfovirus sp.	2487768	Virus
TRSP10689.t1	Tricho_longreads_scf.00078_262981	hypothetical protein FNF31_02790	8.83119e-90	371	Cafeteria roenbergensis	33653	Eukaryota
TRSP10690.t1	Tricho_longreads_scf.00078_262981	dual oxidase	4.05643e-63	758	Kaumoebavirus	1859492	Virus
TRSP10691.t1	Tricho_longreads_scf.00078_262981	Ubiquitinconjugating enzyme subfamily protein	4.11993e-84	635	Acanthamoeba castellanii str. Neff	1257118	Eukaryota
TRSP10692.t1	Tricho_longreads_scf.00078_262981	---NA---		479	No Blast Hit
TRSP10693.t1	Tricho_longreads_scf.00078_262981	---NA---		221	No Blast Hit
TRSP10694.t1	Tricho_longreads_scf.00078_262981	rho GTPase-activating protein 24 isoform X4	2.27269e-21	188	Betta splendens	158456	Eukaryota
TRSP10695.t1	Tricho_longreads_scf.00078_262981	hypothetical protein CPB86DRAFT_772663	0.000631549	772	Serendipita vermifera 'subsp. bescii'	2073127	Eukaryota
TRSP10696.t1	Tricho_longreads_scf.00078_262981	conserved unknown protein	3.32059e-167	523	Ectocarpus siliculosus	2880	Eukaryota
TRSP10697.t1	Tricho_longreads_scf.00078_262981	hypothetical protein CAPTEDRAFT_186148	5.98322e-29	260	Capitella teleta	283909	Eukaryota
TRSP10698.t1	Tricho_longreads_scf.00078_262981	carboxypeptidase A3, putative	1.91871e-99	364	Acanthamoeba castellanii str. Neff	1257118	Eukaryota
TRSP10699.t1	Tricho_longreads_scf.00078_262981	---NA---		469	No Blast Hit
TRSP10700.t1	Tricho_longreads_scf.00078_262981	toxin-antitoxin system YwqK family antitoxin	1.48036e-33	249	Helicobacter pullorum	35818	Bacteria
TRSP10701.t1	Tricho_longreads_scf.00078_262981	hypothetical protein EON67_09790, partial	1.93612e-10	260	archaeon	1906665	Archaea
TRSP10702.t1	Tricho_longreads_scf.00078_262981	Very-long-chain (3R)-3-hydroxyacyl-CoA dehydratase	1.45504e-14	102	Actinidia chinensis var. chinensis	1590841	Eukaryota
TRSP10703.t1	Tricho_longreads_scf.00078_262981	very-long-chain (3R)-3-hydroxyacyl-CoA dehydratase 1	3.3221e-08	110	Nicrophorus vespilloides	110193	Eukaryota
TRSP10704.t1	Tricho_longreads_scf.00078_262981	unnamed protein product	5.1347e-22	282	Symbiodinium microadriaticum	2951	Eukaryota
TRSP10705.t1	Tricho_longreads_scf.00078_262981	hypothetical protein C9374_014138	1.79328e-30	265	Naegleria lovaniensis	51637	Eukaryota
TRSP10706.t1	Tricho_longreads_scf.00078_262981	---NA---		264	No Blast Hit
TRSP10707.t1	Tricho_longreads_scf.00078_262981	hypothetical protein AMSG_02675	7.05892e-30	295	Thecamonas trahens ATCC 50062	461836	Eukaryota
TRSP10708.t1	Tricho_longreads_scf.00078_262981	---NA---		233	No Blast Hit
TRSP10709.t1	Tricho_longreads_scf.00078_262981	---NA---		340	No Blast Hit
TRSP10710.t1	Tricho_longreads_scf.00078_262981	hypothetical protein	1.30781e-67	488	Alphaproteobacteria bacterium	1913988	Bacteria
TRSP10711.t1	Tricho_longreads_scf.00078_262981	toxin-antitoxin system YwqK family antitoxin	1.91627e-14	221	Muricauda olearia	552546	Bacteria
TRSP10712.t1	Tricho_longreads_scf.00078_262981	aldehyde dehydrogenase family protein	0	517	Azospirillum sp. SYSU D00513	2812561	Bacteria
TRSP10713.t1	Tricho_longreads_scf.00078_262981	---NA---		224	No Blast Hit
TRSP10714.t1	Tricho_longreads_scf.00078_262981	hypothetical protein CAOG_07119	8.77472e-71	353	Capsaspora owczarzaki ATCC 30864	595528	Eukaryota
TRSP10715.t1	Tricho_longreads_scf.00078_262981	---NA---		402	No Blast Hit
TRSP10716.t1	Tricho_longreads_scf.00078_262981	RhoGEF domain containing protein	2.36183e-25	745	Acanthamoeba castellanii str. Neff	1257118	Eukaryota
TRSP10717.t1	Tricho_longreads_scf.00078_262981	T9SS type A sorting domain-containing protein	9.08458e-05	204	Bacteroidetes bacterium	1898104	Bacteria
TRSP10718.t1	Tricho_longreads_scf.00078_262981	---NA---		238	No Blast Hit
TRSP10719.t1	Tricho_longreads_scf.00078_262981	Metabotropic glutamate receptor 2	2.61531e-21	1093	Eudyptula novaehollandiae	2052820	Eukaryota
TRSP10720.t1	Tricho_longreads_scf.00078_262981	metabotropic glutamate receptor 1b isoform X5	2.37548e-13	999	Anguilla anguilla	7936	Eukaryota
TRSP10721.t1	Tricho_longreads_scf.00078_262981	hypothetical protein	1.10827e-74	564	Alphaproteobacteria bacterium	1913988	Bacteria
TRSP10722.t1	Tricho_longreads_scf.00078_262981	gamma-aminobutyric acid type B receptor subunit 2-like	1.14666e-29	1245	Saccoglossus kowalevskii	10224	Eukaryota
TRSP10723.t1	Tricho_longreads_scf.00078_262981	acylCoA synthetase, putative	0	687	Acanthamoeba castellanii str. Neff	1257118	Eukaryota
TRSP10724.t1	Tricho_longreads_scf.00078_262981	dual oxidase	8.3722e-62	758	Kaumoebavirus	1859492	Virus
TRSP10725.t1	Tricho_longreads_scf.00078_262981	---NA---		316	No Blast Hit
TRSP10726.t1	Tricho_longreads_scf.00078_262981	F-box domain protein	3.29556e-22	83	Indivirus ILV1	1977633	Virus
TRSP10727.t1	Tricho_longreads_scf.00078_262981	toxin-antitoxin system YwqK family antitoxin	1.77549e-45	431	Lutibacter agarilyticus	1109740	Bacteria
TRSP10728.t1	Tricho_longreads_scf.00078_262981	F-box protein At5g52880 isoform X2	0.000944735	247	Cucurbita maxima	3661	Eukaryota
TRSP10729.t1	Tricho_longreads_scf.00078_262981	toxin-antitoxin system YwqK family antitoxin	2.55928e-26	235	Luminiphilus syltensis NOR5-1B	565045	Bacteria
TRSP10730.t1	Tricho_longreads_scf.00078_262981	---NA---		401	No Blast Hit
TRSP10731.t1	Tricho_longreads_scf.00078_262981	---NA---		187	No Blast Hit
TRSP10732.t1	Tricho_longreads_scf.00078_262981	metabotropic glutamate receptor 6-like	2.76307e-20	1125	Parasteatoda tepidariorum	114398	Eukaryota
TRSP10733.t1	Tricho_longreads_scf.00078_262981	hypothetical protein Harvfovirus36_1, partial	8.80672e-53	351	Harvfovirus sp.	2487768	Virus
TRSP10734.t1	Tricho_longreads_scf.00078_262981	calmodulin-binding protein	9.8494e-25	1025	Planoprotostelium fungivorum	1890364	Eukaryota
TRSP10735.t1	Tricho_longreads_scf.00078_262981	coactosin-like protein	2.73667e-19	143	Parasteatoda tepidariorum	114398	Eukaryota
TRSP10736.t1	Tricho_longreads_scf.00078_262981	toxin-antitoxin system YwqK family antitoxin	2.20161e-50	1081	Lutibacter agarilyticus	1109740	Bacteria
TRSP10737.t1	Tricho_longreads_scf.00078_262981	toxin-antitoxin system YwqK family antitoxin	9.40167e-42	405	Lutibacter agarilyticus	1109740	Bacteria
TRSP10738.t1	Tricho_longreads_scf.00078_262981	---NA---		69	No Blast Hit
TRSP10739.t1	Tricho_longreads_scf.00078_262981	alpha/beta fold hydrolase	2.43307e-14	570	Microcoleus sp. FACHB-831	2692827	Bacteria
TRSP10740.t1	Tricho_longreads_scf.00078_262981	hypothetical protein HF521_013918	1.58906e-11	147	Silurus meridionalis	175797	Eukaryota
TRSP10741.t1	Tricho_longreads_scf.00078_262981	PfpI family peptidase	6.5427e-71	172	Acanthamoeba castellanii	5755	Eukaryota
TRSP10742.t1	Tricho_longreads_scf.00078_262981	---NA---		311	No Blast Hit
TRSP10743.t1	Tricho_longreads_scf.00078_262981	WD40 repeat-like protein	0.000530506	241	Rhizophagus irregularis	588596	Eukaryota
TRSP10744.t1	Tricho_longreads_scf.00078_262981	---NA---		211	No Blast Hit
TRSP10745.t1	Tricho_longreads_scf.00078_262981	Golgi-localized GRIP domain-containing protein	7.34521e-17	2009	Klebsormidium nitens	105231	Eukaryota
TRSP10746.t1	Tricho_longreads_scf.00078_262981	hypothetical protein EJB05_51854	2.45675e-79	336	Eragrostis curvula	38414	Eukaryota
TRSP10747.t1	Tricho_longreads_scf.00078_262981	unnamed protein product	9.5334e-23	600	Chondrus crispus	2769	Eukaryota
TRSP10748.t1	Tricho_longreads_scf.00078_262981	hypothetical protein DUI87_28971	2.66567e-128	1642	Hirundo rustica rustica	333673	Eukaryota
TRSP10749.t1	Tricho_longreads_scf.00078_262981	hypothetical protein	0.00072149	381	Acidobacteria bacterium	1978231	Bacteria
TRSP1075.t1	Tricho_longreads_scf.00086_252263	PREDICTED: uncharacterized protein LOC109584647	3.9094e-40	1414	Amphimedon queenslandica	400682	Eukaryota
TRSP10750.t1	Tricho_longreads_scf.00078_262981	hypothetical protein A6C57_04300	3.25917e-14	327	Fibrella sp. ES10-3-2-2	1834519	Bacteria
TRSP10751.t1	Tricho_longreads_scf.00078_262981	DUF561 domain-containing protein	1.92633e-20	154	Planococcus halotolerans	2233542	Bacteria
TRSP10752.t1	Tricho_longreads_scf.00078_262981	---NA---		457	No Blast Hit
TRSP10753.t1	Tricho_longreads_scf.00078_262981	gammaglutamyltransferase	1.03857e-167	609	Acanthamoeba castellanii str. Neff	1257118	Eukaryota
TRSP10754.t1	Tricho_longreads_scf.00078_262981	monocarboxylate transporter 10-like	3.10251e-50	468	Orbicella faveolata	48498	Eukaryota
TRSP10755.t1	Tricho_longreads_scf.00078_262981	intersectin-1 isoform X1	4.00506e-25	828	Alligator sinensis	38654	Eukaryota
TRSP10756.t1	Tricho_longreads_scf.00078_262981	hypothetical protein THASP1DRAFT_29846	2.45233e-15	276	Thamnocephalis sphaerospora	78915	Eukaryota
TRSP10757.t1	Tricho_longreads_scf.00078_262981	hypothetical protein Harvfovirus20_10	1.44006e-25	269	Harvfovirus sp.	2487768	Virus
TRSP10758.t1	Tricho_longreads_scf.00078_262981	toxin-antitoxin system YwqK family antitoxin	1.93962e-24	201	Candidatus Marinimicrobia bacterium	2026760	Bacteria
TRSP1076.t1	Tricho_longreads_scf.00086_252263	hypothetical protein ACA1_288330	1.21668e-06	245	Acanthamoeba castellanii str. Neff	1257118	Eukaryota
TRSP10760.t1	Tricho_longreads_scf.00128_177280	uncharacterized protein LOC117300286	4.42733e-34	510	Asterias rubens	7604	Eukaryota
TRSP10761.t1	Tricho_longreads_scf.00128_177280	hypothetical protein M378DRAFT_82020	3.84415e-49	371	Amanita muscaria Koide BX008	946122	Eukaryota
TRSP10762.t1	Tricho_longreads_scf.00128_177280	toxin-antitoxin system YwqK family antitoxin	1.49972e-22	211	Halieaceae bacterium IMCC3088	2518989	Bacteria
TRSP10763.t1	Tricho_longreads_scf.00128_177280	ATPase, AAA domain containing protein	0	661	Acanthamoeba castellanii str. Neff	1257118	Eukaryota
TRSP10764.t1	Tricho_longreads_scf.00128_177280	protein kinase domain containing protein	3.01113e-132	811	Acanthamoeba castellanii str. Neff	1257118	Eukaryota
TRSP10765.t1	Tricho_longreads_scf.00128_177280	hypothetical protein	2.29858e-21	320	bacterium	1869227	Bacteria
TRSP10766.t1	Tricho_longreads_scf.00128_177280	hypothetical protein	1.08959e-06	339	Streptomyces sp. MBT53	1488384	Bacteria
TRSP10767.t1	Tricho_longreads_scf.00128_177280	---NA---		186	No Blast Hit
TRSP10768.t1	Tricho_longreads_scf.00128_177280	autophagocytosis associated protein, cterminal domain containing protein	3.73667e-32	173	Acanthamoeba castellanii str. Neff	1257118	Eukaryota
TRSP10769.t1	Tricho_longreads_scf.00128_177280	hypothetical protein PROFUN_09276	2.51035e-36	805	Planoprotostelium fungivorum	1890364	Eukaryota
TRSP1077.t1	Tricho_longreads_scf.00086_252263	hypothetical protein DRQ53_11695, partial	9.90944e-14	441	bacterium	1869227	Bacteria
TRSP10770.t1	Tricho_longreads_scf.00128_177280	hypothetical protein Hyperionvirus5_120	2.15872e-50	370	Hyperionvirus sp.	2487770	Virus
TRSP10771.t1	Tricho_longreads_scf.00128_177280	dual specificity protein phosphatase 1-like	1.09568e-29	227	Rhodamnia argentea	178133	Eukaryota
TRSP10772.t1	Tricho_longreads_scf.00128_177280	hypothetical protein CARUB_v100000100mg, partial	3.00869e-20	92	Capsella rubella	81985	Eukaryota
TRSP10773.t1	Tricho_longreads_scf.00128_177280	---NA---		399	No Blast Hit
TRSP10774.t1	Tricho_longreads_scf.00128_177280	hypothetical protein CYY_000566	1.53944e-53	855	Polysphondylium violaceum	133409	Eukaryota
TRSP10775.t1	Tricho_longreads_scf.00128_177280	hypothetical protein CONCODRAFT_11273	4.52136e-12	301	Conidiobolus coronatus NRRL 28638	796925	Eukaryota
TRSP10776.t1	Tricho_longreads_scf.00128_177280	Piso0_000680	3.93826e-24	101	Millerozyma farinosa CBS 7064	559304	Eukaryota
TRSP10777.t1	Tricho_longreads_scf.00128_177280	hypothetical protein Celaphus_00001414, partial	4.87098e-29	80	Cervus elaphus hippelaphus	46360	Eukaryota
TRSP10778.t1	Tricho_longreads_scf.00128_177280	RecName: Full=PH domain-containing protein DDB_G0274775	1.59394e-149	428	Dictyostelium discoideum AX4	352472	Eukaryota
TRSP10779.t1	Tricho_longreads_scf.00128_177280	---NA---		869	No Blast Hit
TRSP1078.t1	Tricho_longreads_scf.00086_252263	NAD-dependent protein deacylase SRT2 isoform X3	4.39238e-88	321	Elaeis guineensis	51953	Eukaryota
TRSP10780.t1	Tricho_longreads_scf.00128_177280	---NA---		390	No Blast Hit
TRSP10781.t1	Tricho_longreads_scf.00128_177280	leucine-rich repeat domain-containing protein	4.35277e-36	268	Bacteroidaceae bacterium	2212467	Bacteria
TRSP10782.t1	Tricho_longreads_scf.00128_177280	hypothetical protein	4.40812e-138	519	Chlorobi bacterium	2268192	Bacteria
TRSP10783.t1	Tricho_longreads_scf.00128_177280	hypothetical protein BOX15_Mlig031413g1	7.33658e-40	650	Macrostomum lignano	282301	Eukaryota
TRSP10784.t1	Tricho_longreads_scf.00128_177280	---NA---		93	No Blast Hit
TRSP10785.t1	Tricho_longreads_scf.00128_177280	uncharacterized protein si:dkey-205h13.2 isoform X2	2.25574e-09	223	Scyliorhinus canicula	7830	Eukaryota
TRSP10786.t1	Tricho_longreads_scf.00128_177280	actin-like isoform X1	2.80695e-144	367	Physcomitrium patens	3218	Eukaryota
TRSP10787.t1	Tricho_longreads_scf.00128_177280	---NA---		280	No Blast Hit
TRSP10788.t1	Tricho_longreads_scf.00128_177280	hypothetical protein	1.0398e-08	106	Chromatiales bacterium	2026725	Bacteria
TRSP10789.t1	Tricho_longreads_scf.00128_177280	MFS transporter	6.72349e-17	350	bacterium	1869227	Bacteria
TRSP1079.t1	Tricho_longreads_scf.00086_252263	hypothetical protein Catovirus_1_829	2.96495e-17	354	Catovirus CTV1	1977631	Virus
TRSP10790.t1	Tricho_longreads_scf.00128_177280	S-adenosyl-L-methionine-dependent methyltransferase	4.29754e-143	655	Basidiobolus meristosporus CBS 931.73	1314790	Eukaryota
TRSP10791.t1	Tricho_longreads_scf.00128_177280	hypothetical protein A3F80_00030	5.17851e-11	390	Candidatus Melainabacteria bacterium RIFCSPLOWO2_02_FULL_35_15	1801608	Bacteria
TRSP10792.t1	Tricho_longreads_scf.00128_177280	unnamed protein product	4.82299e-46	401	Arabidopsis arenosa	38785	Eukaryota
TRSP10793.t1	Tricho_longreads_scf.00128_177280	isoleucine--tRNA ligase, cytoplasmic-like	0	1131	Anneissia japonica	1529436	Eukaryota
TRSP10794.t1	Tricho_longreads_scf.00128_177280	---NA---		342	No Blast Hit
TRSP10795.t1	Tricho_longreads_scf.00128_177280	hypothetical protein Vafri_16863	9.80534e-16	574	Volvox africanus	51714	Eukaryota
TRSP10796.t1	Tricho_longreads_scf.00128_177280	amino acid adenylation domain-containing protein	1.46829e-111	928	Symploca sp. SIO1A3	2607766	Bacteria
TRSP10797.t1	Tricho_longreads_scf.00128_177280	PhnD/SsuA/transferrin family substrate-binding protein	9.47647e-28	251	Cyanobacteria bacterium CRU_2_1	2720403	Bacteria
TRSP10798.t1	Tricho_longreads_scf.00128_177280	class I SAM-dependent methyltransferase	6.89852e-63	310	Nitrospira sp.	70125	Bacteria
TRSP10799.t1	Tricho_longreads_scf.00128_177280	unnamed protein product	2.36735e-74	349	Adineta steineri	433720	Eukaryota
TRSP1080.t1	Tricho_longreads_scf.00086_252263	sacsin-like	6.10949e-104	2873	Brassica napus	3708	Eukaryota
TRSP10800.t1	Tricho_longreads_scf.00128_177280	serine/threonine-protein kinase 10-like	5.30083e-28	333	Monopterus albus	43700	Eukaryota
TRSP10801.t1	Tricho_longreads_scf.00128_177280	---NA---		165	No Blast Hit
TRSP10802.t1	Tricho_longreads_scf.00128_177280	hypothetical protein PROFUN_03738	4.90737e-100	1211	Planoprotostelium fungivorum	1890364	Eukaryota
TRSP10803.t1	Tricho_longreads_scf.00128_177280	---NA---		726	No Blast Hit
TRSP10804.t1	Tricho_longreads_scf.00128_177280	---NA---		320	No Blast Hit
TRSP10805.t1	Tricho_longreads_scf.00128_177280	endonuclease/exonuclease/phosphatase family protein	1.50699e-40	289	Verrucomicrobiaceae bacterium	2026800	Bacteria
TRSP10806.t1	Tricho_longreads_scf.00128_177280	---NA---		183	No Blast Hit
TRSP10807.t1	Tricho_longreads_scf.00128_177280	transport protein Sec61 alpha subunit, putative	0	477	Acanthamoeba castellanii str. Neff	1257118	Eukaryota
TRSP10808.t1	Tricho_longreads_scf.00128_177280	activating signal cointegrator 1 complex subunit 1-like isoform X1	1.76934e-54	366	Asterias rubens	7604	Eukaryota
TRSP10809.t1	Tricho_longreads_scf.00128_177280	unnamed protein product	5.2333e-48	200	Brachionus calyciflorus	104777	Eukaryota
TRSP1081.t1	Tricho_longreads_scf.00086_252263	hypothetical protein PROFUN_03616	4.87397e-44	474	Planoprotostelium fungivorum	1890364	Eukaryota
TRSP10810.t1	Tricho_longreads_scf.00128_177280	dnaJ protein homolog	4.72611e-118	421	Dendrobium catenatum	906689	Eukaryota
TRSP10811.t1	Tricho_longreads_scf.00128_177280	unnamed protein product, partial	7.27075e-55	1020	Enterobius vermicularis	51028	Eukaryota
TRSP10812.t1	Tricho_longreads_scf.00128_177280	transcription initiation factor TFIID subunit 9-like	2.46791e-26	165	Papaver somniferum	3469	Eukaryota
TRSP10813.t1	Tricho_longreads_scf.00128_177280	---NA---		765	No Blast Hit
TRSP10814.t1	Tricho_longreads_scf.00128_177280	---NA---		325	No Blast Hit
TRSP10815.t1	Tricho_longreads_scf.00128_177280	uncharacterized protein SmJEL517_g05805	1.76867e-37	586	Synchytrium microbalum	1806994	Eukaryota
TRSP10816.t1	Tricho_longreads_scf.00128_177280	toxin-antitoxin system YwqK family antitoxin	1.73449e-20	202	Porphyromonas levii	28114	Bacteria
TRSP10817.t1	Tricho_longreads_scf.00128_177280	hypothetical protein CYY_001083	7.82589e-06	70	Polysphondylium violaceum	133409	Eukaryota
TRSP10818.t1	Tricho_longreads_scf.00128_177280	hypothetical protein SPRG_00126	1.05815e-21	559	Saprolegnia parasitica CBS 223.65	695850	Eukaryota
TRSP10819.t1	Tricho_longreads_scf.00128_177280	hypothetical protein PROFUN_13544	2.2271e-21	274	Planoprotostelium fungivorum	1890364	Eukaryota
TRSP1082.t1	Tricho_longreads_scf.00086_252263	hypothetical protein SAMD00019534_025210	7.95573e-05	524	Acytostelium subglobosum LB1	1410327	Eukaryota
TRSP10820.t1	Tricho_longreads_scf.00128_177280	Mps1 binder-like protein	5.34443e-106	216	Cavenderia fasciculata	261658	Eukaryota
TRSP10821.t1	Tricho_longreads_scf.00128_177280	hypothetical protein EC957_006683, partial	3.84375e-38	999	Mortierella hygrophila	979708	Eukaryota
TRSP10822.t1	Tricho_longreads_scf.00128_177280	hypothetical protein SAMD00019534_044620	2.24748e-53	847	Acytostelium subglobosum LB1	1410327	Eukaryota
TRSP10823.t1	Tricho_longreads_scf.00128_177280	hypothetical protein DICPUDRAFT_40532	2.65842e-159	665	Dictyostelium purpureum	5786	Eukaryota
TRSP10824.t1	Tricho_longreads_scf.00128_177280	class IV aminotransferase	2.34113e-35	300	Chloropicon primus	1764295	Eukaryota
TRSP10825.t1	Tricho_longreads_scf.00128_177280	hypothetical protein	1.42393e-29	458	Planctomycetaceae bacterium	2026779	Bacteria
TRSP10826.t1	Tricho_longreads_scf.00128_177280	serine/threonine-protein kinase 10-like	3.35434e-28	333	Sphaeramia orbicularis	375764	Eukaryota
TRSP10827.t1	Tricho_longreads_scf.00128_177280	---NA---		166	No Blast Hit
TRSP10828.t1	Tricho_longreads_scf.00128_177280	E3 ubiquitin-protein ligase RNF13-like	2.02545e-13	428	Amphimedon queenslandica	400682	Eukaryota
TRSP10829.t1	Tricho_longreads_scf.00128_177280	proteasome 26S subunit, nonATPase, 1, putative	0	979	Acanthamoeba castellanii str. Neff	1257118	Eukaryota
TRSP1083.t1	Tricho_longreads_scf.00086_252263	---NA---		251	No Blast Hit
TRSP10830.t1	Tricho_longreads_scf.00128_177280	hypothetical protein SAMD00019534_097110	4.86399e-45	644	Acytostelium subglobosum LB1	1410327	Eukaryota
TRSP10831.t1	Tricho_longreads_scf.00128_177280	transmembrane protein adipocyte-associated 1	1.45102e-24	334	Selaginella moellendorffii	88036	Eukaryota
TRSP10832.t1	Tricho_longreads_scf.00128_177280	hypothetical protein MVEG_06076	2.44421e-25	1071	Podila verticillata NRRL 6337	1069443	Eukaryota
TRSP10833.t1	Tricho_longreads_scf.00128_177280	---NA---		531	No Blast Hit
TRSP10834.t1	Tricho_longreads_scf.00128_177280	RapGAP/RanGAP domain containing protein	1.36962e-53	540	Acanthamoeba castellanii str. Neff	1257118	Eukaryota
TRSP10835.t1	Tricho_longreads_scf.00128_177280	---NA---		848	No Blast Hit
TRSP1084.t1	Tricho_longreads_scf.00086_252263	leucine-rich repeat protein	7.44533e-36	374	Pithovirus LCPAC101	2506586	Virus
TRSP1085.t1	Tricho_longreads_scf.00086_252263	LOC100145115 protein	5.52496e-10	527	Xenopus tropicalis	8364	Eukaryota
TRSP1086.t1	Tricho_longreads_scf.00086_252263	hypothetical protein PROFUN_11723	1.0988e-69	1798	Planoprotostelium fungivorum	1890364	Eukaryota
TRSP1087.t1	Tricho_longreads_scf.00086_252263	hypothetical protein PybrP1_008740	1.21151e-05	115	Pythium brassicum	1485010	Eukaryota
TRSP10872.t1	Tricho_longreads_scf.00099_221761	---NA---		94	No Blast Hit
TRSP10873.t1	Tricho_longreads_scf.00099_221761	nucleoside hydrolase	2.23131e-23	199	Aeromonas jandaei	650	Bacteria
TRSP10874.t1	Tricho_longreads_scf.00099_221761	hypothetical protein	1.15708e-120	606	Myxococcales bacterium	2026763	Bacteria
TRSP10875.t1	Tricho_longreads_scf.00099_221761	uncharacterized protein SmJEL517_g00194	5.89227e-16	351	Synchytrium microbalum	1806994	Eukaryota
TRSP10876.t1	Tricho_longreads_scf.00099_221761	DNA-directed RNA polymerase II subunit RPB1 isoform X1	2.24617e-22	175	Geotrypetes seraphini	260995	Eukaryota
TRSP10877.t1	Tricho_longreads_scf.00099_221761	---NA---		371	No Blast Hit
TRSP10878.t1	Tricho_longreads_scf.00099_221761	---NA---		101	No Blast Hit
TRSP10879.t1	Tricho_longreads_scf.00099_221761	---NA---		101	No Blast Hit
TRSP1088.t1	Tricho_longreads_scf.00086_252263	---NA---		558	No Blast Hit
TRSP10880.t1	Tricho_longreads_scf.00099_221761	---NA---		96	No Blast Hit
TRSP10881.t1	Tricho_longreads_scf.00099_221761	Ras-related C3 botulinum toxin substrate 1	1.31882e-44	750	Mytilus galloprovincialis	29158	Eukaryota
TRSP10882.t1	Tricho_longreads_scf.00099_221761	beta-N-acetylglucosaminidase domain-containing protein	6.28085e-10	346	Amycolatopsis arida	587909	Bacteria
TRSP10883.t1	Tricho_longreads_scf.00099_221761	unnamed protein product	2.09611e-88	580	Adineta ricciae	249248	Eukaryota
TRSP10884.t1	Tricho_longreads_scf.00099_221761	toxin-antitoxin system YwqK family antitoxin	8.11375e-22	280	Fibrobacter sp. UWB4	1964356	Bacteria
TRSP10885.t1	Tricho_longreads_scf.00099_221761	rRNA 2'-O-methyltransferase fibrillarin isoform X1	2.25011e-125	330	Halyomorpha halys	286706	Eukaryota
TRSP10886.t1	Tricho_longreads_scf.00099_221761	---NA---		468	No Blast Hit
TRSP10887.t1	Tricho_longreads_scf.00099_221761	ribosomal protein L14b/L23e	1.35794e-67	139	Basidiobolus meristosporus CBS 931.73	1314790	Eukaryota
TRSP10888.t1	Tricho_longreads_scf.00099_221761	HAUS augmin-like complex subunit 4	1.00761e-07	299	Amphimedon queenslandica	400682	Eukaryota
TRSP10889.t1	Tricho_longreads_scf.00099_221761	hypothetical protein CYY_001784	0	1044	Polysphondylium violaceum	133409	Eukaryota
TRSP1089.t1	Tricho_longreads_scf.00086_252263	hypothetical protein	6.70171e-09	290	Deltaproteobacteria bacterium	2026735	Bacteria
TRSP10890.t1	Tricho_longreads_scf.00099_221761	hypothetical protein Harvfovirus20_10	2.62606e-69	413	Harvfovirus sp.	2487768	Virus
TRSP10891.t1	Tricho_longreads_scf.00099_221761	F-box protein	8.77232e-06	249	Neochlamydia sp. S13	1353976	Bacteria
TRSP10892.t1	Tricho_longreads_scf.00099_221761	---NA---		297	No Blast Hit
TRSP10893.t1	Tricho_longreads_scf.00099_221761	---NA---		140	No Blast Hit
TRSP10894.t1	Tricho_longreads_scf.00099_221761	G-protein alpha subunit	5.58048e-16	579	Naegleria gruberi	5762	Eukaryota
TRSP10895.t1	Tricho_longreads_scf.00099_221761	TauD/TfdA family dioxygenase	8.65604e-21	78	Chondromyces crocatus	52	Bacteria
TRSP10896.t1	Tricho_longreads_scf.00099_221761	Rho GTPase	9.65799e-45	210	Cavenderia fasciculata	261658	Eukaryota
TRSP10897.t1	Tricho_longreads_scf.00099_221761	---NA---		487	No Blast Hit
TRSP10898.t1	Tricho_longreads_scf.00099_221761	putative GTP-binding nuclear protein RAN1	8.62055e-74	217	Planoprotostelium fungivorum	1890364	Eukaryota
TRSP10899.t1	Tricho_longreads_scf.00099_221761	unnamed protein product	1.40658e-36	353	Rotaria sp. Silwood2	2762512	Eukaryota
TRSP1090.t1	Tricho_longreads_scf.00086_252263	[Skp1-protein]-hydroxyproline N-acetylglucosaminyltransferase, family GT60	2.54308e-49	358	Ectocarpus siliculosus	2880	Eukaryota
TRSP10900.t1	Tricho_longreads_scf.00099_221761	putative heat shock protein 70.1	1.26323e-30	390	Ovis aries	9940	Eukaryota
TRSP10901.t1	Tricho_longreads_scf.00099_221761	---NA---		223	No Blast Hit
TRSP10902.t1	Tricho_longreads_scf.00099_221761	serine-tRNA ligase domain containing protein	0	478	Acanthamoeba castellanii str. Neff	1257118	Eukaryota
TRSP10903.t1	Tricho_longreads_scf.00099_221761	hypothetical protein CYY_009826	1.53417e-49	1842	Polysphondylium violaceum	133409	Eukaryota
TRSP10904.t1	Tricho_longreads_scf.00099_221761	---NA---		461	No Blast Hit
TRSP10905.t1	Tricho_longreads_scf.00099_221761	oxysterol-binding protein-related protein 6-like isoform X2	3.45736e-107	933	Asterias rubens	7604	Eukaryota
TRSP10906.t1	Tricho_longreads_scf.00099_221761	---NA---		276	No Blast Hit
TRSP10907.t1	Tricho_longreads_scf.00099_221761	major facilitator superfamily domain-containing protein	9.67052e-07	478	Ampelomyces quisqualis	50730	Eukaryota
TRSP10908.t1	Tricho_longreads_scf.00099_221761	protein SUPPRESSOR OF K(+) TRANSPORT GROWTH DEFECT 1	1.02279e-19	216	Helianthus annuus	4232	Eukaryota
TRSP10909.t1	Tricho_longreads_scf.00099_221761	---NA---		630	No Blast Hit
TRSP1091.t1	Tricho_longreads_scf.00086_252263	ruvB-like 2	0	472	Pomacea canaliculata	400727	Eukaryota
TRSP10910.t1	Tricho_longreads_scf.00099_221761	---NA---		116	No Blast Hit
TRSP10911.t1	Tricho_longreads_scf.00099_221761	---NA---		102	No Blast Hit
TRSP10912.t1	Tricho_longreads_scf.00099_221761	NHP2-like protein 1	7.65801e-61	126	Helianthus annuus	4232	Eukaryota
TRSP10913.t1	Tricho_longreads_scf.00099_221761	ribosomal protein RPS5	2.91581e-92	197	Toxoplasma gondii CAST	943122	Eukaryota
TRSP10914.t1	Tricho_longreads_scf.00099_221761	---NA---		377	No Blast Hit
TRSP10915.t1	Tricho_longreads_scf.00099_221761	dual oxidase	8.00283e-81	882	Kaumoebavirus	1859492	Virus
TRSP10916.t1	Tricho_longreads_scf.00099_221761	hypothetical protein SAMD00019534_077380	2.23973e-20	830	Acytostelium subglobosum LB1	1410327	Eukaryota
TRSP10917.t1	Tricho_longreads_scf.00099_221761	---NA---		715	No Blast Hit
TRSP10918.t1	Tricho_longreads_scf.00099_221761	hypothetical protein	5.27845e-52	338	Rhodoferax sp.	50421	Bacteria
TRSP10919.t1	Tricho_longreads_scf.00099_221761	rho-related GTP-binding protein RhoD	9.68061e-41	192	Urocitellus parryii	9999	Eukaryota
TRSP1092.t1	Tricho_longreads_scf.00086_252263	---NA---		282	No Blast Hit
TRSP10920.t1	Tricho_longreads_scf.00099_221761	---NA---		907	No Blast Hit
TRSP10921.t1	Tricho_longreads_scf.00099_221761	Tubulin alpha-4 chain	0	449	Apostasia shenzhenica	1088818	Eukaryota
TRSP10922.t1	Tricho_longreads_scf.00099_221761	hypothetical protein CAPTEDRAFT_93455	8.57458e-47	774	Capitella teleta	283909	Eukaryota
TRSP10923.t1	Tricho_longreads_scf.00099_221761	L-rhamnonate dehydratase	0	414	Blastocatellia bacterium	2052146	Bacteria
TRSP10924.t1	Tricho_longreads_scf.00099_221761	kelch domain containing 1, putative	9.97845e-30	301	Acanthamoeba castellanii str. Neff	1257118	Eukaryota
TRSP10925.t1	Tricho_longreads_scf.00099_221761	hypothetical protein	5.06578e-27	365	Poriferisphaera corsica	2528020	Bacteria
TRSP10926.t1	Tricho_longreads_scf.00099_221761	hypothetical protein SETIT_7G212600v2	8.07472e-66	103	Setaria italica	4555	Eukaryota
TRSP10927.t1	Tricho_longreads_scf.00099_221761	hypothetical protein E3N88_26426	2.3101e-83	135	Mikania micrantha	192012	Eukaryota
TRSP10928.t1	Tricho_longreads_scf.00099_221761	---NA---		298	No Blast Hit
TRSP10929.t1	Tricho_longreads_scf.00099_221761	---NA---		286	No Blast Hit
TRSP1093.t1	Tricho_longreads_scf.00086_252263	fasciclin domain-containing protein	6.14349e-32	487	Spongiivirga citrea	1481457	Bacteria
TRSP10930.t1	Tricho_longreads_scf.00099_221761	Camk2b protein	4.91634e-76	418	Acanthamoeba castellanii str. Neff	1257118	Eukaryota
TRSP10931.t1	Tricho_longreads_scf.00099_221761	hypothetical protein	6.04834e-17	190	Chitinivibrionales bacterium	2663014	Bacteria
TRSP10932.t1	Tricho_longreads_scf.00099_221761	---NA---		495	No Blast Hit
TRSP10933.t1	Tricho_longreads_scf.00099_221761	---NA---		98	No Blast Hit
TRSP10934.t1	Tricho_longreads_scf.00099_221761	---NA---		97	No Blast Hit
TRSP10935.t1	Tricho_longreads_scf.00099_221761	glutamate synthase 1 [NADH], chloroplastic isoform X1	0	2575	Jatropha curcas	180498	Eukaryota
TRSP10936.t1	Tricho_longreads_scf.00099_221761	hypothetical protein D6725_10755	9.81975e-22	359	Planctomycetes bacterium	2026780	Bacteria
TRSP10937.t1	Tricho_longreads_scf.00099_221761	SEL1-like repeat protein	1.08504e-58	645	Aliarcobacter butzleri	28197	Bacteria
TRSP10938.t1	Tricho_longreads_scf.00099_221761	hypothetical protein K493DRAFT_50780	0	971	Basidiobolus meristosporus CBS 931.73	1314790	Eukaryota
TRSP10939.t1	Tricho_longreads_scf.00099_221761	---NA---		152	No Blast Hit
TRSP1094.t1	Tricho_longreads_scf.00086_252263	---NA---		189	No Blast Hit
TRSP10940.t1	Tricho_longreads_scf.00099_221761	NAD+ isocitrate dehydrogenase	9.8679e-141	379	Tieghemostelium lacteum	361077	Eukaryota
TRSP10941.t1	Tricho_longreads_scf.00099_221761	hypothetical protein INT43_002907	1.07136e-23	390	Umbelopsis isabellina	91625	Eukaryota
TRSP10942.t1	Tricho_longreads_scf.00099_221761	hypothetical protein AM324_15580	7.33431e-09	189	Candidatus Thorarchaeota archaeon SMTZ1-83	1706445	Archaea
TRSP10943.t1	Tricho_longreads_scf.00099_221761	probable Rpo26-18kD subunit of DNA-directed RNA polymerases I, II, III	6.83757e-38	144	Sporisorium scitamineum	49012	Eukaryota
TRSP10944.t1	Tricho_longreads_scf.00099_221761	exocyst complex component 7-like isoform X4	2.11223e-30	635	Branchiostoma floridae	7739	Eukaryota
TRSP10945.t1	Tricho_longreads_scf.00099_221761	---NA---		264	No Blast Hit
TRSP10946.t1	Tricho_longreads_scf.00099_221761	---NA---		318	No Blast Hit
TRSP10947.t1	Tricho_longreads_scf.00099_221761	Rho family, small GTP binding protein Rac3, putative	4.89407e-106	193	Acanthamoeba castellanii str. Neff	1257118	Eukaryota
TRSP10948.t1	Tricho_longreads_scf.00099_221761	---NA---		337	No Blast Hit
TRSP10949.t1	Tricho_longreads_scf.00099_221761	O-phosphoseryl-tRNA(Sec) selenium transferase-like isoform X1	7.34209e-146	445	Stylophora pistillata	50429	Eukaryota
TRSP1095.t1	Tricho_longreads_scf.00086_252263	tryptophan-rich sensory protein	5.07395e-33	288	Fibrella aestuarina BUZ 2	1166018	Bacteria
TRSP10950.t1	Tricho_longreads_scf.00099_221761	hypothetical protein CYY_004177	0	1015	Polysphondylium violaceum	133409	Eukaryota
TRSP10951.t1	Tricho_longreads_scf.00099_221761	histidine phosphatase family protein	1.61805e-21	776	Alphaproteobacteria bacterium	1913988	Bacteria
TRSP10952.t1	Tricho_longreads_scf.00099_221761	---NA---		146	No Blast Hit
TRSP10953.t1	Tricho_longreads_scf.00099_221761	uncharacterized protein SmJEL517_g00992	6.01209e-163	1014	Synchytrium microbalum	1806994	Eukaryota
TRSP10954.t1	Tricho_longreads_scf.00099_221761	LTV1-like protein	1.55115e-24	401	Alligator mississippiensis	8496	Eukaryota
TRSP10955.t1	Tricho_longreads_scf.00099_221761	---NA---		263	No Blast Hit
TRSP10956.t1	Tricho_longreads_scf.00099_221761	hypothetical protein	8.9203e-45	474	Chloroflexi bacterium	2026724	Bacteria
TRSP10957.t1	Tricho_longreads_scf.00099_221761	hypothetical protein AYI68_g8281	1.32679e-16	175	Smittium mucronatum	133383	Eukaryota
TRSP10958.t1	Tricho_longreads_scf.00099_221761	WD40 repeat-like protein	4.55551e-66	454	Coemansia reversa NRRL 1564	763665	Eukaryota
TRSP10959.t1	Tricho_longreads_scf.00099_221761	calcium-binding protein NCS-1	5.22704e-42	187	Thecamonas trahens ATCC 50062	461836	Eukaryota
TRSP1096.t1	Tricho_longreads_scf.00086_252263	putative ubiquitin-protein ligase	8.7356e-19	912	Leptomonas pyrrhocoris	157538	Eukaryota
TRSP10960.t1	Tricho_longreads_scf.00099_221761	Not1-domain-containing protein	0	2136	Gigaspora margarita	4874	Eukaryota
TRSP10961.t1	Tricho_longreads_scf.00099_221761	---NA---		574	No Blast Hit
TRSP10962.t1	Tricho_longreads_scf.00908_20654	toxin-antitoxin system YwqK family antitoxin	1.21813e-15	117	Fusobacterium pseudoperiodonticum	2663009	Bacteria
TRSP10963.t1	Tricho_longreads_scf.00908_20654	sister chromatid cohesion protein DCC1	2.64024e-43	731	Cannabis sativa	3483	Eukaryota
TRSP10964.t1	Tricho_longreads_scf.00908_20654	hypothetical protein	6.91181e-12	221	Chitinivibrionales bacterium	2663014	Bacteria
TRSP10965.t1	Tricho_longreads_scf.00908_20654	unnamed protein product	1.03979e-18	182	Rotaria sp. Silwood1	2762511	Eukaryota
TRSP10966.t1	Tricho_longreads_scf.00908_20654	protein phosphatase 2C-related protein	3.29741e-58	657	Planoprotostelium fungivorum	1890364	Eukaryota
TRSP10967.t1	Tricho_longreads_scf.00908_20654	alpha/beta hydrolase	1.17128e-58	278	Deltaproteobacteria bacterium	2026735	Bacteria
TRSP10968.t1	Tricho_longreads_scf.00908_20654	toxin-antitoxin system YwqK family antitoxin	9.65507e-43	450	Fibrobacter sp. UWB12	1896203	Bacteria
TRSP10969.t1	Tricho_longreads_scf.00908_20654	uncharacterized protein LOC111031144	0.000168801	1400	Myzus persicae	13164	Eukaryota
TRSP1097.t1	Tricho_longreads_scf.00086_252263	ribonuclease P protein subunit p21-like	1.51454e-16	170	Dendronephthya gigantea	151771	Eukaryota
TRSP10970.t1	Tricho_longreads_scf.00908_20654	---NA---		241	No Blast Hit
TRSP10971.t1	Tricho_longreads_scf.00360_36979	---NA---		622	No Blast Hit
TRSP10972.t1	Tricho_longreads_scf.00360_36979	hypothetical protein FNF29_02880	4.95168e-91	1004	Cafeteria roenbergensis	33653	Eukaryota
TRSP10973.t1	Tricho_longreads_scf.00360_36979	---NA---		176	No Blast Hit
TRSP10974.t1	Tricho_longreads_scf.00360_36979	palmitoleoyl-protein carboxylesterase NOTUM	5.73117e-73	368	Talpa occidentalis	50954	Eukaryota
TRSP10975.t1	Tricho_longreads_scf.00360_36979	---NA---		85	No Blast Hit
TRSP10976.t1	Tricho_longreads_scf.00360_36979	MULTISPECIES: hypothetical protein	3.27323e-30	341	Clostridium neonatale	137838	Bacteria
TRSP10977.t1	Tricho_longreads_scf.00360_36979	---NA---		170	No Blast Hit
TRSP10978.t1	Tricho_longreads_scf.00360_36979	DTubulin:F3II DARPin complex	2.71362e-11	92	synthetic construct	32630
TRSP1098.t1	Tricho_longreads_scf.00086_252263	---NA---		190	No Blast Hit
TRSP10980.t1	Tricho_longreads_scf.02070_11921	---NA---		125	No Blast Hit
TRSP10981.t1	Tricho_longreads_scf.02070_11921	hypothetical protein BU14_0262s0011	1.00234e-26	309	Porphyra umbilicalis	2786	Eukaryota
TRSP10982.t1	Tricho_longreads_scf.02070_11921	---NA---		119	No Blast Hit
TRSP10983.t1	Tricho_longreads_scf.02070_11921	hypothetical protein ACA1_070410	1.16764e-64	405	Acanthamoeba castellanii str. Neff	1257118	Eukaryota
TRSP10984.t1	Tricho_longreads_scf.02070_11921	hypothetical protein PROFUN_07266	2.04605e-93	858	Planoprotostelium fungivorum	1890364	Eukaryota
TRSP1099.t1	Tricho_longreads_scf.00086_252263	---NA---		184	No Blast Hit
TRSP10996.t1	Tricho_longreads_scf.00059_288384	hypothetical protein BU14_0262s0011	1.15627e-27	468	Porphyra umbilicalis	2786	Eukaryota
TRSP10997.t1	Tricho_longreads_scf.00059_288384	hypothetical protein F443_12779	3.90509e-08	160	Phytophthora parasitica P1569	1317065	Eukaryota
TRSP10998.t1	Tricho_longreads_scf.00059_288384	---NA---		184	No Blast Hit
TRSP10999.t1	Tricho_longreads_scf.00059_288384	phosphoesterase	3.64283e-44	400	Tieghemostelium lacteum	361077	Eukaryota
TRSP1100.t1	Tricho_longreads_scf.00086_252263	---NA---		203	No Blast Hit
TRSP11000.t1	Tricho_longreads_scf.00059_288384	metallophosphoesterase	7.17282e-74	292	Blastocatellia bacterium AA13	2169413	Bacteria
TRSP11001.t1	Tricho_longreads_scf.00059_288384	hypothetical protein SAMD00019534_068750	9.95257e-44	631	Acytostelium subglobosum LB1	1410327	Eukaryota
TRSP11002.t1	Tricho_longreads_scf.00059_288384	hypothetical protein Ae201684_000411	6.57868e-28	273	Aphanomyces euteiches	100861	Eukaryota
TRSP11003.t1	Tricho_longreads_scf.00059_288384	hypothetical protein LOTGIDRAFT_231062	1.3358e-43	374	Lottia gigantea	225164	Eukaryota
TRSP11004.t1	Tricho_longreads_scf.00059_288384	hypothetical protein	7.35314e-13	857	Duganella ginsengisoli	1462440	Bacteria
TRSP11005.t1	Tricho_longreads_scf.00059_288384	hypothetical protein SAMD00019534_120030, partial	1.53184e-69	368	Acytostelium subglobosum LB1	1410327	Eukaryota
TRSP11006.t1	Tricho_longreads_scf.00059_288384	Scube1	1.49585e-09	504	Scenedesmus sp. PABB004	2742167	Eukaryota
TRSP11007.t1	Tricho_longreads_scf.00059_288384	hypothetical protein B9S34_13850	2.78607e-115	479	Opitutae bacterium Tous-C1TDCM	1982319	Bacteria
TRSP11008.t1	Tricho_longreads_scf.00059_288384	XYPPX repeat family protein	1.42447e-16	125	Trichomonas vaginalis G3	412133	Eukaryota
TRSP11009.t1	Tricho_longreads_scf.00059_288384	---NA---		460	No Blast Hit
TRSP1101.t1	Tricho_longreads_scf.00086_252263	elongation factor 1 alpha	0	442	Arachnula sp. CL12	862247	Eukaryota
TRSP11010.t1	Tricho_longreads_scf.00059_288384	mitochondrial Lon protease	1.28347e-151	761	Andalucia godoyi	505711	Eukaryota
TRSP11011.t1	Tricho_longreads_scf.00059_288384	poly [ADP-ribose] polymerase 6-like isoform X3	5.40625e-138	748	Branchiostoma belcheri	7741	Eukaryota
TRSP11012.t1	Tricho_longreads_scf.00059_288384	hypothetical protein EB796_022969	5.13546e-19	244	Bugula neritina	10212	Eukaryota
TRSP11013.t1	Tricho_longreads_scf.00059_288384	---NA---		250	No Blast Hit
TRSP11014.t1	Tricho_longreads_scf.00059_288384	---NA---		388	No Blast Hit
TRSP11015.t1	Tricho_longreads_scf.00059_288384	carbon catabolite repressor protein 4 homolog 5 isoform X1	2.23838e-13	602	Solanum tuberosum	4113	Eukaryota
TRSP11016.t1	Tricho_longreads_scf.00059_288384	SGNH/GDSL hydrolase family protein	2.13551e-61	206	Chloroflexi bacterium	2026724	Bacteria
TRSP11017.t1	Tricho_longreads_scf.00059_288384	hypothetical protein	2.89529e-25	341	Kofleriaceae bacterium	2212474	Bacteria
TRSP11018.t1	Tricho_longreads_scf.00059_288384	1-acyl-sn-glycerol-3-phosphate acyltransferase	4.9293e-53	256	Candidatus Sericytochromatia bacterium	2762020	Bacteria
TRSP11019.t1	Tricho_longreads_scf.00059_288384	hypothetical protein PPL_03679	3.11136e-12	510	Heterostelium album PN500	670386	Eukaryota
TRSP1102.t1	Tricho_longreads_scf.00086_252263	redoxin domain-containing protein	8.2759e-45	190	Marivivens sp.	1978374	Bacteria
TRSP11020.t1	Tricho_longreads_scf.00059_288384	hypothetical protein Hyperionvirus6_11	2.64982e-37	401	Hyperionvirus sp.	2487770	Virus
TRSP11021.t1	Tricho_longreads_scf.00059_288384	unnamed protein product	1.10027e-20	888	Adineta steineri	433720	Eukaryota
TRSP11022.t1	Tricho_longreads_scf.00059_288384	---NA---		628	No Blast Hit
TRSP11023.t1	Tricho_longreads_scf.00059_288384	TerD family protein	5.46657e-24	499	Desulfobacterales bacterium	2044940	Bacteria
TRSP11024.t1	Tricho_longreads_scf.00059_288384	---NA---		172	No Blast Hit
TRSP11025.t1	Tricho_longreads_scf.00059_288384	hypothetical protein KC19_VG268800	9.68021e-34	158	Ceratodon purpureus	3225	Eukaryota
TRSP11026.t1	Tricho_longreads_scf.00059_288384	DNA cytosine methyltransferase	3.07877e-34	776	Planctomycetes bacterium	2026780	Bacteria
TRSP11027.t1	Tricho_longreads_scf.00059_288384	---NA---		187	No Blast Hit
TRSP11028.t1	Tricho_longreads_scf.00059_288384	metal ion transporter	1.55742e-21	99	Rhizophagus clarus	94130	Eukaryota
TRSP11029.t1	Tricho_longreads_scf.00059_288384	hypothetical protein Glove_284g114	1.53521e-10	373	Diversispora epigaea	1348612	Eukaryota
TRSP1103.t1	Tricho_longreads_scf.00086_252263	hypothetical protein	1.44279e-80	1007	bacterium	1869227	Bacteria
TRSP11030.t1	Tricho_longreads_scf.00059_288384	---NA---		82	No Blast Hit
TRSP11031.t1	Tricho_longreads_scf.00059_288384	---NA---		276	No Blast Hit
TRSP11032.t1	Tricho_longreads_scf.00059_288384	hypothetical protein Harvfovirus20_10	1.12391e-63	437	Harvfovirus sp.	2487768	Virus
TRSP11033.t1	Tricho_longreads_scf.00059_288384	---NA---		156	No Blast Hit
TRSP11034.t1	Tricho_longreads_scf.00059_288384	Leucine Rich Repeat and BTB/POZ domain containing protein	1.88069e-11	673	Acanthamoeba castellanii str. Neff	1257118	Eukaryota
TRSP11035.t1	Tricho_longreads_scf.00059_288384	ankyrin repeat domain-containing protein	5.18977e-14	148	Candidatus Competibacteraceae bacterium	2053538	Bacteria
TRSP11036.t1	Tricho_longreads_scf.00059_288384	hypothetical protein BCR42DRAFT_412008	1.83894e-171	699	Absidia repens	90262	Eukaryota
TRSP11037.t1	Tricho_longreads_scf.00059_288384	SAMD5 protein	4.59112e-08	325	Todus mexicanus	135184	Eukaryota
TRSP11038.t1	Tricho_longreads_scf.00059_288384	replication factor C subunit 2 isoform X1	1.98919e-122	444	Coffea eugenioides	49369	Eukaryota
TRSP11039.t1	Tricho_longreads_scf.00059_288384	hypothetical protein PROFUN_14684	2.27216e-78	564	Planoprotostelium fungivorum	1890364	Eukaryota
TRSP1104.t1	Tricho_longreads_scf.00086_252263	InlB B-repeat-containing protein	1.68808e-53	485	Bombiscardovia coagulans	686666	Bacteria
TRSP11040.t1	Tricho_longreads_scf.00059_288384	hypothetical protein SAMD00019534_003300	0	1485	Acytostelium subglobosum LB1	1410327	Eukaryota
TRSP11041.t1	Tricho_longreads_scf.00059_288384	---NA---		233	No Blast Hit
TRSP11042.t1	Tricho_longreads_scf.00059_288384	---NA---		125	No Blast Hit
TRSP11043.t1	Tricho_longreads_scf.00059_288384	unnamed protein product	1.76792e-29	604	Caenorhabditis bovis	2654633	Eukaryota
TRSP11044.t1	Tricho_longreads_scf.00059_288384	---NA---		560	No Blast Hit
TRSP11045.t1	Tricho_longreads_scf.00059_288384	hypothetical protein PROFUN_14141	4.50647e-64	309	Planoprotostelium fungivorum	1890364	Eukaryota
TRSP11046.t1	Tricho_longreads_scf.00059_288384	replication protein A 70 kDa DNA-binding subunit-like isoform X1	4.23814e-72	738	Branchiostoma belcheri	7741	Eukaryota
TRSP11047.t1	Tricho_longreads_scf.00059_288384	ras-related protein Rap1-like	2.61396e-52	228	Penaeus monodon	6687	Eukaryota
TRSP11048.t1	Tricho_longreads_scf.00059_288384	mucin-22-like isoform X4	4.88152e-26	533	Gouania willdenowi	441366	Eukaryota
TRSP11049.t1	Tricho_longreads_scf.00059_288384	serine C-palmitoyltransferase subunit	8.669e-109	467	Heterostelium album PN500	670386	Eukaryota
TRSP1105.t1	Tricho_longreads_scf.00086_252263	---NA---		173	No Blast Hit
TRSP11050.t1	Tricho_longreads_scf.00059_288384	RecName: Full=40S ribosomal protein SA; AltName: Full=33 kDa laminin-binding protein; AltName: Full=p40	7.34045e-72	1955	Hydra viridissima	6082	Eukaryota
TRSP11051.t1	Tricho_longreads_scf.00059_288384	---NA---		75	No Blast Hit
TRSP11052.t1	Tricho_longreads_scf.00059_288384	FYVEtype Zn finger-containing protein	2.70053e-28	495	Acanthamoeba castellanii str. Neff	1257118	Eukaryota
TRSP11053.t1	Tricho_longreads_scf.00059_288384	E3 ubiquitin-protein ligase arih1-like isoform X2	1.14353e-99	522	Rhipicephalus microplus	6941	Eukaryota
TRSP11054.t1	Tricho_longreads_scf.00059_288384	---NA---		160	No Blast Hit
TRSP11055.t1	Tricho_longreads_scf.00059_288384	SDR family NAD(P)-dependent oxidoreductase	1.02148e-80	230	Vitiosangium sp. GDMCC 1.1324	2138576	Bacteria
TRSP11056.t1	Tricho_longreads_scf.00059_288384	probable 2-oxoglutarate-dependent dioxygenase At3g50210 isoform X1	9.53714e-29	299	Rhizophagus clarus	94130	Eukaryota
TRSP11057.t1	Tricho_longreads_scf.00059_288384	calcium-binding protein	2.96133e-12	219	Catellatospora bangladeshensis	310355	Bacteria
TRSP11058.t1	Tricho_longreads_scf.00059_288384	hypothetical protein PROFUN_09432	1.361e-127	493	Planoprotostelium fungivorum	1890364	Eukaryota
TRSP11059.t1	Tricho_longreads_scf.00059_288384	AFG1 family ATPase	1.36169e-70	268	Proteobacteria bacterium	1977087	Bacteria
TRSP1106.t1	Tricho_longreads_scf.00086_252263	hypothetical protein PROFUN_07214	3.74445e-30	337	Planoprotostelium fungivorum	1890364	Eukaryota
TRSP11060.t1	Tricho_longreads_scf.00059_288384	hypothetical protein PPL_03606	4.83266e-39	446	Heterostelium album PN500	670386	Eukaryota
TRSP11061.t1	Tricho_longreads_scf.00059_288384	SRPBCC family protein	0.000322308	323	Desulfitobacterium dichloroeliminans LMG P-21439	871963	Bacteria
TRSP11062.t1	Tricho_longreads_scf.00059_288384	RING finger protein 121	4.46147e-80	308	Aedes albopictus	7160	Eukaryota
TRSP11063.t1	Tricho_longreads_scf.00059_288384	Leo1-like protein	2.2823e-22	437	Trichinella nativa	6335	Eukaryota
TRSP11064.t1	Tricho_longreads_scf.00059_288384	ribonucleotide-diphosphate reductase subunit beta	3.42265e-165	333	Chitinophagales bacterium	2448779	Bacteria
TRSP11065.t1	Tricho_longreads_scf.00059_288384	hypothetical protein PybrP1_011993	4.34326e-55	311	Pythium brassicum	1485010	Eukaryota
TRSP11066.t1	Tricho_longreads_scf.00059_288384	hypothetical protein ASPGLDRAFT_44239	6.36642e-09	591	Aspergillus glaucus CBS 516.65	1160497	Eukaryota
TRSP11067.t1	Tricho_longreads_scf.00059_288384	---NA---		470	No Blast Hit
TRSP11068.t1	Tricho_longreads_scf.00059_288384	---NA---		246	No Blast Hit
TRSP11069.t1	Tricho_longreads_scf.00059_288384	hypothetical protein SAMD00019534_093090	9.73214e-158	665	Acytostelium subglobosum LB1	1410327	Eukaryota
TRSP1107.t1	Tricho_longreads_scf.00086_252263	---NA---		210	No Blast Hit
TRSP11070.t1	Tricho_longreads_scf.00059_288384	D-glycerate dehydrogenase	9.28533e-88	328	Planctomycetes bacterium	2026780	Bacteria
TRSP11071.t1	Tricho_longreads_scf.00059_288384	---NA---		296	No Blast Hit
TRSP11072.t1	Tricho_longreads_scf.00059_288384	hypothetical protein CYY_006485	9.701e-135	2336	Polysphondylium violaceum	133409	Eukaryota
TRSP11073.t1	Tricho_longreads_scf.00059_288384	rho GTPase-activating protein 45-like	1.50939e-24	582	Patiria miniata	46514	Eukaryota
TRSP11074.t1	Tricho_longreads_scf.00059_288384	silent information regulator protein Sir2	1.1174e-06	566	Eubacterium sp.	142586	Bacteria
TRSP11075.t1	Tricho_longreads_scf.00059_288384	U3 small nucleolar RNA-associated protein 6 homolog	2.69535e-34	677	Acropora millepora	45264	Eukaryota
TRSP11076.t1	Tricho_longreads_scf.00059_288384	hypothetical protein	1.4599e-37	441	Pseudanabaena sp. PCC 6802	118173	Bacteria
TRSP11077.t1	Tricho_longreads_scf.00059_288384	putative procollagen-lysine 5-dioxygenase	7.1943e-25	494	Medicago truncatula	3880	Eukaryota
TRSP11078.t1	Tricho_longreads_scf.00059_288384	---NA---		508	No Blast Hit
TRSP11079.t1	Tricho_longreads_scf.00059_288384	IPT/TIG domain-containing protein	6.93288e-14	644	Acidobacteria bacterium	1978231	Bacteria
TRSP1108.t1	Tricho_longreads_scf.00086_252263	hypothetical protein A2V78_16620	3.2706e-46	154	Betaproteobacteria bacterium RBG_16_64_18	1797477	Bacteria
TRSP11080.t1	Tricho_longreads_scf.00059_288384	IPT/TIG domain containing protein	3.18836e-43	630	Acanthamoeba castellanii str. Neff	1257118	Eukaryota
TRSP11081.t1	Tricho_longreads_scf.00059_288384	cardiolipin synthase B	3.99766e-66	517	Planctomycetes bacterium	2026780	Bacteria
TRSP11082.t1	Tricho_longreads_scf.00059_288384	formylglycine-generating enzyme family protein	1.05264e-109	377	Verrucomicrobia bacterium S94	2488809	Bacteria
TRSP11083.t1	Tricho_longreads_scf.00059_288384	tetratricopeptide repeat protein	1.81173e-14	263	Methanobacterium congolense	118062	Archaea
TRSP11084.t1	Tricho_longreads_scf.00059_288384	---NA---		140	No Blast Hit
TRSP11085.t1	Tricho_longreads_scf.00059_288384	endonuclease	4.54144e-33	414	Amphritea spongicola	707589	Bacteria
TRSP11086.t1	Tricho_longreads_scf.00059_288384	---NA---		201	No Blast Hit
TRSP11087.t1	Tricho_longreads_scf.00059_288384	hypothetical protein	2.29354e-50	339	Helicobacter pullorum	35818	Bacteria
TRSP11088.t1	Tricho_longreads_scf.00059_288384	---NA---		897	No Blast Hit
TRSP11089.t1	Tricho_longreads_scf.00059_288384	hypothetical protein SPPG_01236	1.55662e-78	1126	Spizellomyces punctatus DAOM BR117	645134	Eukaryota
TRSP1109.t1	Tricho_longreads_scf.00086_252263	ABC transporter D family protein	0	728	Tieghemostelium lacteum	361077	Eukaryota
TRSP11090.t1	Tricho_longreads_scf.00059_288384	exportin-4 isoform X2	5.42873e-67	1083	Scyliorhinus canicula	7830	Eukaryota
TRSP11091.t1	Tricho_longreads_scf.00059_288384	hypothetical protein SPPG_05969	9.07695e-72	213	Spizellomyces punctatus DAOM BR117	645134	Eukaryota
TRSP11092.t1	Tricho_longreads_scf.00059_288384	vacuolar fusion protein ccz1 family protein	2.68375e-112	399	Acanthamoeba castellanii str. Neff	1257118	Eukaryota
TRSP11093.t1	Tricho_longreads_scf.00059_288384	hypothetical protein	2.50736e-49	470	Desulfobulbus sp. AH-315-M07	2814557	Bacteria
TRSP11094.t1	Tricho_longreads_scf.00059_288384	---NA---		154	No Blast Hit
TRSP11095.t1	Tricho_longreads_scf.00059_288384	hypothetical protein CHU98_g11133	4.16583e-05	264	Xylaria longipes	114818	Eukaryota
TRSP11096.t1	Tricho_longreads_scf.00059_288384	L-cysteine desulfhydrase-like	6.55645e-73	830	Gigantopelta aegis	1735272	Eukaryota
TRSP11097.t1	Tricho_longreads_scf.00059_288384	DgyrCDS14285	7.17926e-123	1051	Dimorphilus gyrociliatus	2664684	Eukaryota
TRSP11098.t1	Tricho_longreads_scf.00059_288384	hypothetical protein	1.10842e-26	539	Desulfobulbus sp. AH-315-M07	2814557	Bacteria
TRSP11099.t1	Tricho_longreads_scf.00059_288384	hypothetical protein	3.04507e-22	262	Tupanvirus soda lake	2126985	Virus
TRSP1110.t1	Tricho_longreads_scf.00086_252263	hypothetical protein K493DRAFT_280505	5.18094e-70	610	Basidiobolus meristosporus CBS 931.73	1314790	Eukaryota
TRSP11100.t1	Tricho_longreads_scf.00059_288384	hypothetical protein	3.43399e-43	566	Desulfobulbus sp. AH-315-M07	2814557	Bacteria
TRSP11101.t1	Tricho_longreads_scf.00059_288384	Poly(ADPribose) polymerase catalytic domain containing protein	1.48634e-35	929	Acanthamoeba castellanii str. Neff	1257118	Eukaryota
TRSP11102.t1	Tricho_longreads_scf.00059_288384	hypothetical protein RMATCC62417_03233	2.59647e-110	591	Rhizopus microsporus	58291	Eukaryota
TRSP11103.t1	Tricho_longreads_scf.00059_288384	Mitochondrial carrier protein	3.16519e-59	311	Acanthamoeba castellanii str. Neff	1257118	Eukaryota
TRSP11104.t1	Tricho_longreads_scf.00059_288384	I/LWEQ domain-containing protein	6.62032e-51	877	Tieghemostelium lacteum	361077	Eukaryota
TRSP1111.t1	Tricho_longreads_scf.00086_252263	elongation factor 1 alpha	0	442	Arachnula sp. CL12	862247	Eukaryota
TRSP11114.t1	Tricho_longreads_scf.00238_71830	uncharacterized protein TM35_000023850	8.86522e-11	389	Trypanosoma theileri	67003	Eukaryota
TRSP11115.t1	Tricho_longreads_scf.00238_71830	---NA---		254	No Blast Hit
TRSP11116.t1	Tricho_longreads_scf.00238_71830	GTPase of unknown function subfamily protein	8.89129e-98	394	Acanthamoeba castellanii str. Neff	1257118	Eukaryota
TRSP11117.t1	Tricho_longreads_scf.00238_71830	4'-phosphopantetheinyl transferase superfamily protein	1.32216e-55	280	Acanthamoeba castellanii str. Neff	1257118	Eukaryota
TRSP11118.t1	Tricho_longreads_scf.00238_71830	protein O-linked-mannose beta-1,4-N-acetylglucosaminyltransferase 2	4.17014e-17	463	Megalops cyprinoides	118141	Eukaryota
TRSP11119.t1	Tricho_longreads_scf.00238_71830	uncharacterized protein LOC117100960	2.52126e-31	390	Anneissia japonica	1529436	Eukaryota
TRSP1112.t1	Tricho_longreads_scf.00086_252263	---NA---		537	No Blast Hit
TRSP11120.t1	Tricho_longreads_scf.00238_71830	protein lifeguard 4-like	2.05072e-40	420	Wasmannia auropunctata	64793	Eukaryota
TRSP11121.t1	Tricho_longreads_scf.00238_71830	integrator complex subunit 1	1.47444e-90	2167	Lingula anatina	7574	Eukaryota
TRSP11122.t1	Tricho_longreads_scf.00238_71830	---NA---		92	No Blast Hit
TRSP11123.t1	Tricho_longreads_scf.00238_71830	hypothetical protein CYY_009852	0	615	Polysphondylium violaceum	133409	Eukaryota
TRSP11124.t1	Tricho_longreads_scf.00238_71830	---NA---		78	No Blast Hit
TRSP11125.t1	Tricho_longreads_scf.00238_71830	putative glycoside hydrolase family 15 protein	5.64518e-12	368	Formosa agariphila KMM 3901	1347342	Bacteria
TRSP11126.t1	Tricho_longreads_scf.00238_71830	hypothetical protein JKP88DRAFT_279820	7.12595e-28	210	Tribonema minus	303371	Eukaryota
TRSP11127.t1	Tricho_longreads_scf.00238_71830	DNA helicase PcrA	2.91738e-150	766	Bacillus cohnii	33932	Bacteria
TRSP11128.t1	Tricho_longreads_scf.00238_71830	hypothetical protein CAPTEDRAFT_21329	4.50703e-14	67	Capitella teleta	283909	Eukaryota
TRSP11129.t1	Tricho_longreads_scf.00238_71830	---NA---		359	No Blast Hit
TRSP1113.t1	Tricho_longreads_scf.00086_252263	arylsulfatase I-like	8.52605e-107	483	Acropora millepora	45264	Eukaryota
TRSP11130.t1	Tricho_longreads_scf.00238_71830	unnamed protein product	1.95675e-08	269	Caenorhabditis bovis	2654633	Eukaryota
TRSP11131.t1	Tricho_longreads_scf.00238_71830	hypothetical protein JKP88DRAFT_279820	4.60358e-28	210	Tribonema minus	303371	Eukaryota
TRSP11132.t1	Tricho_longreads_scf.00238_71830	predicted protein	1.74974e-11	369	Monosiga brevicollis MX1	431895	Eukaryota
TRSP11133.t1	Tricho_longreads_scf.00238_71830	---NA---		78	No Blast Hit
TRSP11134.t1	Tricho_longreads_scf.00238_71830	DNA mismatch repair protein MutL	2.51965e-39	748	Wallemia mellicola	1708541	Eukaryota
TRSP11135.t1	Tricho_longreads_scf.00238_71830	---NA---		86	No Blast Hit
TRSP11136.t1	Tricho_longreads_scf.00238_71830	---NA---		361	No Blast Hit
TRSP11137.t1	Tricho_longreads_scf.00238_71830	---NA---		305	No Blast Hit
TRSP11138.t1	Tricho_longreads_scf.00238_71830	Wiscott-Aldrich syndrome protein	1.46435e-12	515	Dictyostelium discoideum AX4	352472	Eukaryota
TRSP11139.t1	Tricho_longreads_scf.00238_71830	nocturnin isoform X6	1.65462e-37	312	Diabrotica virgifera virgifera	50390	Eukaryota
TRSP1114.t1	Tricho_longreads_scf.00086_252263	hypothetical protein PROFUN_01318	1.03458e-27	544	Planoprotostelium fungivorum	1890364	Eukaryota
TRSP11140.t1	Tricho_longreads_scf.00238_71830	---NA---		290	No Blast Hit
TRSP11141.t1	Tricho_longreads_scf.00238_71830	hypothetical protein	5.59143e-23	373	Planctomycetaceae bacterium	2026779	Bacteria
TRSP11142.t1	Tricho_longreads_scf.00238_71830	serine/threonine protein kinase	7.57806e-06	591	Oscillatoriales cyanobacterium	1151	Bacteria
TRSP11143.t1	Tricho_longreads_scf.00238_71830	fatty acid desaturase 2-like	1.54624e-139	441	Crassostrea virginica	6565	Eukaryota
TRSP11144.t1	Tricho_longreads_scf.00238_71830	hypothetical protein Harvfovirus8_11	9.00447e-57	422	Harvfovirus sp.	2487768	Virus
TRSP11145.t1	Tricho_longreads_scf.00238_71830	Transposon Ty3-G Gag-Pol polyprotein	1.794e-102	647	Exaiptasia diaphana	2652724	Eukaryota
TRSP11146.t1	Tricho_longreads_scf.00176_129850	unnamed protein product, partial	2.55041e-09	311	Rotaria sp. Silwood1	2762511	Eukaryota
TRSP11147.t1	Tricho_longreads_scf.00176_129850	---NA---		457	No Blast Hit
TRSP11148.t1	Tricho_longreads_scf.00176_129850	ABC1-like protein (ABC1)	5.68214e-81	809	Polytomella parva	51329	Eukaryota
TRSP11149.t1	Tricho_longreads_scf.00176_129850	hypothetical protein SAMD00019534_059040	1.24856e-16	992	Acytostelium subglobosum LB1	1410327	Eukaryota
TRSP1115.t1	Tricho_longreads_scf.00086_252263	monooxygenase	1.82477e-86	587	Thecamonas trahens ATCC 50062	461836	Eukaryota
TRSP11150.t1	Tricho_longreads_scf.00176_129850	hypothetical protein CYY_000323	3.13612e-64	383	Polysphondylium violaceum	133409	Eukaryota
TRSP11151.t1	Tricho_longreads_scf.00176_129850	---NA---		221	No Blast Hit
TRSP11152.t1	Tricho_longreads_scf.00176_129850	hypothetical protein BKI52_28530	3.634e-34	681	marine bacterium AO1-C	1905359	Bacteria
TRSP11153.t1	Tricho_longreads_scf.00176_129850	protein phosphatase 2C-related protein	1.77348e-27	315	Tieghemostelium lacteum	361077	Eukaryota
TRSP11154.t1	Tricho_longreads_scf.00176_129850	hypothetical protein	0.000539074	130	Lutibacter sp. B1	2725996	Bacteria
TRSP11155.t1	Tricho_longreads_scf.00176_129850	---NA---		165	No Blast Hit
TRSP11156.t1	Tricho_longreads_scf.00176_129850	---NA---		125	No Blast Hit
TRSP11157.t1	Tricho_longreads_scf.00176_129850	---NA---		289	No Blast Hit
TRSP11158.t1	Tricho_longreads_scf.00176_129850	---NA---		654	No Blast Hit
TRSP11159.t1	Tricho_longreads_scf.00176_129850	---NA---		473	No Blast Hit
TRSP1116.t1	Tricho_longreads_scf.00086_252263	phosphofructokinase family protein	0	596	Striga asiatica	4170	Eukaryota
TRSP11160.t1	Tricho_longreads_scf.00176_129850	hypothetical protein PROFUN_14082	3.95345e-91	611	Planoprotostelium fungivorum	1890364	Eukaryota
TRSP11161.t1	Tricho_longreads_scf.00176_129850	---NA---		310	No Blast Hit
TRSP11162.t1	Tricho_longreads_scf.00176_129850	hypothetical protein CYY_001065	5.4114e-98	345	Polysphondylium violaceum	133409	Eukaryota
TRSP11163.t1	Tricho_longreads_scf.00176_129850	F-box domain protein	8.4731e-48	251	Indivirus ILV1	1977633	Virus
TRSP11164.t1	Tricho_longreads_scf.00176_129850	DUF1295 domain-containing protein	5.19447e-94	324	Myxococcales bacterium	2026763	Bacteria
TRSP11165.t1	Tricho_longreads_scf.00176_129850	---NA---		587	No Blast Hit
TRSP11166.t1	Tricho_longreads_scf.00176_129850	---NA---		884	No Blast Hit
TRSP11167.t1	Tricho_longreads_scf.00176_129850	unnamed protein product	1.92101e-36	592	Rotaria sp. Silwood1	2762511	Eukaryota
TRSP11168.t1	Tricho_longreads_scf.00176_129850	NAD(P)-dependent alcohol dehydrogenase	2.19979e-108	365	Chloroflexi bacterium	2026724	Bacteria
TRSP11169.t1	Tricho_longreads_scf.00176_129850	---NA---		166	No Blast Hit
TRSP1117.t1	Tricho_longreads_scf.00086_252263	---NA---		86	No Blast Hit
TRSP11170.t1	Tricho_longreads_scf.00176_129850	---NA---		510	No Blast Hit
TRSP11171.t1	Tricho_longreads_scf.00176_129850	iron-sulfur cluster assembly accessory protein	2.39099e-30	123	Alphaproteobacteria bacterium 33-17	1895704	Bacteria
TRSP11172.t1	Tricho_longreads_scf.00176_129850	unnamed protein product	0	661	Candidula unifasciata	100452	Eukaryota
TRSP11173.t1	Tricho_longreads_scf.00176_129850	hypothetical protein PROFUN_04938	2.05828e-16	725	Planoprotostelium fungivorum	1890364	Eukaryota
TRSP11174.t1	Tricho_longreads_scf.00176_129850	carbon-nitrogen hydrolase family protein	1.77893e-66	264	bacterium	1869227	Bacteria
TRSP11175.t1	Tricho_longreads_scf.00176_129850	kinase-like domain-containing protein	2.09626e-17	649	Rhizophagus clarus	94130	Eukaryota
TRSP11176.t1	Tricho_longreads_scf.00176_129850	hypothetical protein L211DRAFT_845789	4.54478e-07	647	Terfezia boudieri ATCC MYA-4762	1051890	Eukaryota
TRSP11177.t1	Tricho_longreads_scf.00176_129850	unnamed protein product	1.2619e-89	324	Rotaria socialis	392032	Eukaryota
TRSP11178.t1	Tricho_longreads_scf.00176_129850	---NA---		188	No Blast Hit
TRSP11179.t1	Tricho_longreads_scf.00176_129850	unnamed protein product	3.30732e-18	307	Vitrella brassicaformis CCMP3155	1169540	Eukaryota
TRSP1118.t1	Tricho_longreads_scf.00086_252263	---NA---		123	No Blast Hit
TRSP11180.t1	Tricho_longreads_scf.00176_129850	---NA---		351	No Blast Hit
TRSP11181.t1	Tricho_longreads_scf.00176_129850	SPFH/Band 7/PHB domain protein	6.79075e-23	386	Halothermothrix orenii H 168	373903	Bacteria
TRSP11182.t1	Tricho_longreads_scf.00176_129850	---NA---		100	No Blast Hit
TRSP11183.t1	Tricho_longreads_scf.00176_129850	hypothetical protein CYY_008700	0	1008	Polysphondylium violaceum	133409	Eukaryota
TRSP11184.t1	Tricho_longreads_scf.00176_129850	---NA---		227	No Blast Hit
TRSP11185.t1	Tricho_longreads_scf.00176_129850	cleavage and polyadenylation specificity factor subunit 2-like	0	730	Hydra vulgaris	6087	Eukaryota
TRSP11186.t1	Tricho_longreads_scf.00176_129850	---NA---		217	No Blast Hit
TRSP11187.t1	Tricho_longreads_scf.00176_129850	---NA---		130	No Blast Hit
TRSP11188.t1	Tricho_longreads_scf.00176_129850	hypothetical protein INT47_011824	0	627	Mucor saturninus	64648	Eukaryota
TRSP11189.t1	Tricho_longreads_scf.00176_129850	autotransporter	6.18632e-12	332	Mesorhizobium sp. DCY119	2108445	Bacteria
TRSP1119.t1	Tricho_longreads_scf.00086_252263	---NA---		260	No Blast Hit
TRSP11190.t1	Tricho_longreads_scf.01620_14046	hypothetical protein PROFUN_09982	0	1396	Planoprotostelium fungivorum	1890364	Eukaryota
TRSP11191.t1	Tricho_longreads_scf.01620_14046	toxin-antitoxin system YwqK family antitoxin	1.60117e-29	228	Fusobacterium periodonticum	860	Bacteria
TRSP11192.t1	Tricho_longreads_scf.01620_14046	diphthine--ammonia ligase	3.56431e-21	250	Linepithema humile	83485	Eukaryota
TRSP11193.t1	Tricho_longreads_scf.00030_432512	cellulose 1,4-beta-cellobiosidase	9.15406e-106	391	Deltaproteobacteria bacterium	2026735	Bacteria
TRSP11194.t1	Tricho_longreads_scf.00030_432512	hypothetical protein Harvfovirus20_10	3.59476e-53	426	Harvfovirus sp.	2487768	Virus
TRSP11195.t1	Tricho_longreads_scf.00030_432512	hypothetical protein EMIHUDRAFT_230887	1.88426e-129	428	Emiliania huxleyi CCMP1516	280463	Eukaryota
TRSP11196.t1	Tricho_longreads_scf.00030_432512	uncharacterized protein PTSG_00955	1.29938e-15	254	Salpingoeca rosetta	946362	Eukaryota
TRSP11197.t1	Tricho_longreads_scf.00030_432512	hypothetical protein PROFUN_11548	5.46801e-44	1643	Planoprotostelium fungivorum	1890364	Eukaryota
TRSP11198.t1	Tricho_longreads_scf.00030_432512	---NA---		441	No Blast Hit
TRSP11199.t1	Tricho_longreads_scf.00030_432512	peptide-methionine (R)-S-oxide reductase MsrB	1.24927e-52	256	Spirulina sp. SIO3F2	2607816	Bacteria
TRSP112.t1	Tricho_longreads_scf.01631_13997	hypothetical protein Y032_0020g151	0.000239398	515	Ancylostoma ceylanicum	53326	Eukaryota
TRSP1120.t1	Tricho_longreads_scf.00086_252263	unnamed protein product	1.27826e-167	621	Adineta ricciae	249248	Eukaryota
TRSP11200.t1	Tricho_longreads_scf.00030_432512	hypothetical protein PROFUN_02928	2.73476e-85	388	Planoprotostelium fungivorum	1890364	Eukaryota
TRSP11201.t1	Tricho_longreads_scf.00030_432512	hypothetical protein PIROE2DRAFT_13916	6.64704e-41	262	Piromyces sp. E2	73868	Eukaryota
TRSP11202.t1	Tricho_longreads_scf.00030_432512	hypothetical protein ERJ69_05860	2.80489e-49	772	Aphanocapsa feldmannii 288cV	2507555	Bacteria
TRSP11203.t1	Tricho_longreads_scf.00030_432512	---NA---		77	No Blast Hit
TRSP11204.t1	Tricho_longreads_scf.00030_432512	ammonium transporter 1 member 2	4.21366e-98	520	Theobroma cacao	3641	Eukaryota
TRSP11205.t1	Tricho_longreads_scf.00030_432512	unnamed protein product	3.16186e-141	1193	Rotaria sordida	392033	Eukaryota
TRSP11206.t1	Tricho_longreads_scf.00030_432512	hypothetical protein Hyperionvirus2_165	8.23608e-29	148	Hyperionvirus sp.	2487770	Virus
TRSP11207.t1	Tricho_longreads_scf.00030_432512	---NA---		122	No Blast Hit
TRSP11208.t1	Tricho_longreads_scf.00030_432512	Ubiquitin carboxylterminal hydrolase	1.05348e-141	798	Acanthamoeba castellanii str. Neff	1257118	Eukaryota
TRSP11209.t1	Tricho_longreads_scf.00030_432512	unnamed protein product	6.07773e-37	601	Pieris macdunnoughi	345717	Eukaryota
TRSP1121.t1	Tricho_longreads_scf.00086_252263	FAD-dependent oxidoreductase	3.44148e-60	920	Candidatus Pacearchaeota archaeon	2026773	Archaea
TRSP11210.t1	Tricho_longreads_scf.00030_432512	---NA---		206	No Blast Hit
TRSP11211.t1	Tricho_longreads_scf.00030_432512	hypothetical protein C6495_18700	2.38723e-16	603	Candidatus Poribacteria bacterium	2026781	Bacteria
TRSP11212.t1	Tricho_longreads_scf.00030_432512	myb-like DNA-binding domain protein	2.75556e-58	582	Ichthyophthirius multifiliis	5932	Eukaryota
TRSP11213.t1	Tricho_longreads_scf.00030_432512	hypothetical protein Harvfovirus20_10	6.42336e-65	433	Harvfovirus sp.	2487768	Virus
TRSP11214.t1	Tricho_longreads_scf.00030_432512	hypothetical protein CFC21_033051, partial	4.80872e-34	508	Triticum aestivum	4565	Eukaryota
TRSP11215.t1	Tricho_longreads_scf.00030_432512	hypothetical protein TD95_004819	2.69335e-05	340	Thielaviopsis punctulata	72032	Eukaryota
TRSP11216.t1	Tricho_longreads_scf.00030_432512	---NA---		227	No Blast Hit
TRSP11217.t1	Tricho_longreads_scf.00030_432512	---NA---		302	No Blast Hit
TRSP11218.t1	Tricho_longreads_scf.00030_432512	---NA---		335	No Blast Hit
TRSP11219.t1	Tricho_longreads_scf.00030_432512	NAD(P)H-dependent oxidoreductase	7.15281e-65	195	Saprospiraceae bacterium	2202734	Bacteria
TRSP1122.t1	Tricho_longreads_scf.00086_252263	ankyrin repeat domain-containing protein	9.6979e-14	429	Pyrinomonadaceae bacterium	2283092	Bacteria
TRSP11220.t1	Tricho_longreads_scf.00030_432512	hypothetical protein Hyperionvirus5_103	6.33346e-48	402	Hyperionvirus sp.	2487770	Virus
TRSP11221.t1	Tricho_longreads_scf.00030_432512	toxin-antitoxin system YwqK family antitoxin	6.27059e-13	167	Candidatus Methylopumilus planktonicus	1581557	Bacteria
TRSP11222.t1	Tricho_longreads_scf.00030_432512	unnamed protein product	0.000941015	794	Rotaria sp. Silwood2	2762512	Eukaryota
TRSP11223.t1	Tricho_longreads_scf.00030_432512	DNA repair and recombination protein RAD54B	1.90167e-164	1021	Mytilus galloprovincialis	29158	Eukaryota
TRSP11224.t1	Tricho_longreads_scf.00030_432512	lysophosphatidylcholine acyltransferase 2-like isoform X1	6.40413e-64	535	Crassostrea virginica	6565	Eukaryota
TRSP11225.t1	Tricho_longreads_scf.00030_432512	PREDICTED: uncharacterized protein LOC104808231	1.01426e-17	192	Tarenaya hassleriana	28532	Eukaryota
TRSP11226.t1	Tricho_longreads_scf.00030_432512	RhoGAP domain-containing protein	1.12382e-23	832	Tieghemostelium lacteum	361077	Eukaryota
TRSP11227.t1	Tricho_longreads_scf.00030_432512	hypothetical protein Harvfovirus8_11	6.12287e-58	456	Harvfovirus sp.	2487768	Virus
TRSP11228.t1	Tricho_longreads_scf.00030_432512	hypothetical protein	2.01466e-20	201	Bacteroidetes bacterium	1898104	Bacteria
TRSP11229.t1	Tricho_longreads_scf.00030_432512	F-box/LRR-repeat protein 20	4.62558e-12	284	Trichogramma pretiosum	7493	Eukaryota
TRSP1123.t1	Tricho_longreads_scf.00086_252263	peptidase S8 and S53 domain-containing protein	1.05082e-161	555	Thecamonas trahens ATCC 50062	461836	Eukaryota
TRSP11230.t1	Tricho_longreads_scf.00030_432512	---NA---		422	No Blast Hit
TRSP11231.t1	Tricho_longreads_scf.00030_432512	---NA---		403	No Blast Hit
TRSP11232.t1	Tricho_longreads_scf.00030_432512	unnamed protein product	2.30723e-63	687	Rotaria sp. Silwood1	2762511	Eukaryota
TRSP11233.t1	Tricho_longreads_scf.00030_432512	---NA---		176	No Blast Hit
TRSP11234.t1	Tricho_longreads_scf.00030_432512	autophagy protein 16	5.68649e-143	551	Tieghemostelium lacteum	361077	Eukaryota
TRSP11235.t1	Tricho_longreads_scf.00030_432512	Pleckstrin-2	1.14968e-07	292	Hondaea fermentalgiana	2315210	Eukaryota
TRSP11236.t1	Tricho_longreads_scf.00030_432512	arylsulfatase B-like	0	532	Amphimedon queenslandica	400682	Eukaryota
TRSP11237.t1	Tricho_longreads_scf.00030_432512	F-box domain protein	6.35397e-37	240	Indivirus ILV1	1977633	Virus
TRSP11238.t1	Tricho_longreads_scf.00030_432512	ARMADILLO BTB ARABIDOPSIS PROTEIN 1-like	1.96285e-28	667	Tarenaya hassleriana	28532	Eukaryota
TRSP11239.t1	Tricho_longreads_scf.00030_432512	regulator of chromosome condensation domain-containing protein	4.37639e-41	417	Tieghemostelium lacteum	361077	Eukaryota
TRSP1124.t1	Tricho_longreads_scf.00086_252263	protein tolA, putative	4.42585e-65	392	Acanthamoeba castellanii str. Neff	1257118	Eukaryota
TRSP11240.t1	Tricho_longreads_scf.00030_432512	hypothetical protein Harvfovirus8_11	6.3838e-40	288	Harvfovirus sp.	2487768	Virus
TRSP11241.t1	Tricho_longreads_scf.00030_432512	hypothetical protein LCPAC302_00910	5.18898e-18	244	Pithovirus LCPAC302	2506593	Virus
TRSP11242.t1	Tricho_longreads_scf.00030_432512	hypothetical protein SeLEV6574_g07468	4.64003e-35	326	Synchytrium endobioticum	286115	Eukaryota
TRSP11243.t1	Tricho_longreads_scf.00030_432512	---NA---		184	No Blast Hit
TRSP11244.t1	Tricho_longreads_scf.00030_432512	hypothetical protein PROFUN_06899	1.0716e-140	637	Planoprotostelium fungivorum	1890364	Eukaryota
TRSP11245.t1	Tricho_longreads_scf.00030_432512	---NA---		295	No Blast Hit
TRSP11246.t1	Tricho_longreads_scf.00030_432512	---NA---		100	No Blast Hit
TRSP11247.t1	Tricho_longreads_scf.00030_432512	hypothetical protein	2.58973e-93	516	Alphaproteobacteria bacterium	1913988	Bacteria
TRSP11248.t1	Tricho_longreads_scf.00030_432512	hypothetical protein AMSG_03034	9.81515e-31	675	Thecamonas trahens ATCC 50062	461836	Eukaryota
TRSP11249.t1	Tricho_longreads_scf.00030_432512	hypothetical protein	5.77586e-32	318	Tupanvirus soda lake	2126985	Virus
TRSP1125.t1	Tricho_longreads_scf.00086_252263	conserved Plasmodium protein, unknown function	4.20031e-10	200	Plasmodium reichenowi	5854	Eukaryota
TRSP11250.t1	Tricho_longreads_scf.00030_432512	Ubiquitin carboxylterminal hydrolase	6.99419e-71	935	Acanthamoeba castellanii str. Neff	1257118	Eukaryota
TRSP11251.t1	Tricho_longreads_scf.00030_432512	---NA---		487	No Blast Hit
TRSP11252.t1	Tricho_longreads_scf.00030_432512	conserved unknown protein	1.15271e-114	405	Ectocarpus siliculosus	2880	Eukaryota
TRSP11253.t1	Tricho_longreads_scf.00030_432512	uncharacterized protein LOC100888473	5.49486e-26	393	Strongylocentrotus purpuratus	7668	Eukaryota
TRSP11254.t1	Tricho_longreads_scf.00030_432512	MORN repeat protein	3.30056e-25	221	Pacmanvirus A23	1932881	Virus
TRSP11255.t1	Tricho_longreads_scf.00030_432512	toxin-antitoxin system YwqK family antitoxin	5.10322e-19	249	Algibacter aestuarii	912802	Bacteria
TRSP11256.t1	Tricho_longreads_scf.00030_432512	diacylglycerol kinase epsilon-like	1.07766e-81	804	Planoprotostelium fungivorum	1890364	Eukaryota
TRSP11257.t1	Tricho_longreads_scf.00030_432512	hypothetical protein CROQUDRAFT_662377	1.29588e-17	123	Cronartium quercuum f. sp. fusiforme G11	708437	Eukaryota
TRSP11258.t1	Tricho_longreads_scf.00030_432512	uncharacterized protein LOC34624050	1.40988e-06	446	Cyclospora cayetanensis	88456	Eukaryota
TRSP11259.t1	Tricho_longreads_scf.00030_432512	hypothetical protein PROFUN_15436	1.87801e-128	453	Planoprotostelium fungivorum	1890364	Eukaryota
TRSP1126.t1	Tricho_longreads_scf.00086_252263	---NA---		573	No Blast Hit
TRSP11260.t1	Tricho_longreads_scf.00030_432512	---NA---		442	No Blast Hit
TRSP11261.t1	Tricho_longreads_scf.00030_432512	Hypothetical predicted protein	1.01361e-56	498	Mytilus galloprovincialis	29158	Eukaryota
TRSP11262.t1	Tricho_longreads_scf.00030_432512	Hypothetical predicted protein	1.53471e-46	316	Mytilus galloprovincialis	29158	Eukaryota
TRSP11263.t1	Tricho_longreads_scf.00030_432512	---NA---		947	No Blast Hit
TRSP11264.t1	Tricho_longreads_scf.00030_432512	---NA---		356	No Blast Hit
TRSP11265.t1	Tricho_longreads_scf.00030_432512	THO1 protein (nuclear matrix protein p84), putative	1.44776e-43	516	Acanthamoeba castellanii str. Neff	1257118	Eukaryota
TRSP11266.t1	Tricho_longreads_scf.00030_432512	hypothetical protein DMF84_14610	1.74557e-83	811	Acidobacteria bacterium	1978231	Bacteria
TRSP11267.t1	Tricho_longreads_scf.00030_432512	toxin-antitoxin system YwqK family antitoxin	1.73768e-22	214	Halieaceae bacterium IMCC3088	2518989	Bacteria
TRSP11268.t1	Tricho_longreads_scf.00030_432512	---NA---		322	No Blast Hit
TRSP11269.t1	Tricho_longreads_scf.00030_432512	serine/threonine protein kinase	1.19563e-12	452	Rhizophagus clarus	94130	Eukaryota
TRSP1127.t1	Tricho_longreads_scf.00086_252263	unnamed protein product, partial	2.2942e-71	1319	Rotaria sp. Silwood2	2762512	Eukaryota
TRSP11270.t1	Tricho_longreads_scf.00030_432512	---NA---		649	No Blast Hit
TRSP11271.t1	Tricho_longreads_scf.00030_432512	T-complex protein 1 subunit alpha	0	546	Catenaria anguillulae PL171	765915	Eukaryota
TRSP11272.t1	Tricho_longreads_scf.00030_432512	Xaa-Pro aminopeptidase	7.80233e-103	437	Elusimicrobia bacterium	2030800	Bacteria
TRSP11273.t1	Tricho_longreads_scf.00030_432512	PREDICTED: uncharacterized protein LOC108193766 isoform X1	8.35242e-18	224	Daucus carota subsp. sativus	79200	Eukaryota
TRSP11274.t1	Tricho_longreads_scf.00030_432512	---NA---		941	No Blast Hit
TRSP11275.t1	Tricho_longreads_scf.00030_432512	arylsulfatase B-like	0	546	Amphimedon queenslandica	400682	Eukaryota
TRSP11276.t1	Tricho_longreads_scf.00030_432512	hypothetical protein	1.76609e-57	272	Nitrospirae bacterium	2026887	Bacteria
TRSP11277.t1	Tricho_longreads_scf.00030_432512	hypothetical protein Hyperionvirus5_103	7.18234e-19	408	Hyperionvirus sp.	2487770	Virus
TRSP11278.t1	Tricho_longreads_scf.00030_432512	hypothetical protein	5.99986e-83	948	Adiantum capillus-veneris	13818	Eukaryota
TRSP11279.t1	Tricho_longreads_scf.00030_432512	---NA---		430	No Blast Hit
TRSP1128.t1	Tricho_longreads_scf.00086_252263	hypothetical protein	3.60902e-77	459	Rhodospirillaceae bacterium	1898112	Bacteria
TRSP11280.t1	Tricho_longreads_scf.00030_432512	Tyrosine phosphatase	9.10636e-50	350	Acanthamoeba castellanii str. Neff	1257118	Eukaryota
TRSP11281.t1	Tricho_longreads_scf.00030_432512	hypothetical protein	1.41098e-19	230	Vibrio scophthalmi	45658	Bacteria
TRSP11282.t1	Tricho_longreads_scf.00030_432512	YqgE/AlgH family protein	1.71781e-05	340	Proteobacteria bacterium	1977087	Bacteria
TRSP11283.t1	Tricho_longreads_scf.00030_432512	zinc finger, c2h2 type domain containing protein	9.45938e-18	700	Acanthamoeba castellanii str. Neff	1257118	Eukaryota
TRSP11284.t1	Tricho_longreads_scf.00030_432512	hypothetical protein	1.48248e-22	1088	Duganella ginsengisoli	1462440	Bacteria
TRSP11285.t1	Tricho_longreads_scf.00030_432512	unnamed protein product, partial	5.75618e-123	831	Mus musculus	10090	Eukaryota
TRSP11286.t1	Tricho_longreads_scf.00030_432512	hypothetical protein	5.38131e-37	331	Candidatus Pacearchaeota archaeon	2026773	Archaea
TRSP11287.t1	Tricho_longreads_scf.00030_432512	hypothetical protein Harvfovirus8_11	2.16269e-44	550	Harvfovirus sp.	2487768	Virus
TRSP11288.t1	Tricho_longreads_scf.00030_432512	hypothetical protein Mapa_012227	1.76664e-68	257	Marchantia paleacea	56867	Eukaryota
TRSP11289.t1	Tricho_longreads_scf.00030_432512	Ras- protein Rap-1b	1.26376e-43	576	Clonorchis sinensis	79923	Eukaryota
TRSP1129.t1	Tricho_longreads_scf.00086_252263	unnamed protein product, partial	1.57006e-16	265	Candidula unifasciata	100452	Eukaryota
TRSP11290.t1	Tricho_longreads_scf.00030_432512	---NA---		367	No Blast Hit
TRSP11291.t1	Tricho_longreads_scf.00030_432512	VWA domain-containing protein	2.09727e-103	818	Acidobacteria bacterium	1978231	Bacteria
TRSP11292.t1	Tricho_longreads_scf.00030_432512	hypothetical protein PROFUN_11132	8.48996e-124	527	Planoprotostelium fungivorum	1890364	Eukaryota
TRSP11293.t1	Tricho_longreads_scf.00030_432512	Ubiquitin	1.04042e-15	917	Artemisia annua	35608	Eukaryota
TRSP11294.t1	Tricho_longreads_scf.00030_432512	---NA---		137	No Blast Hit
TRSP11295.t1	Tricho_longreads_scf.00030_432512	hypothetical protein SAMD00019534_010550, partial	1.62335e-53	351	Acytostelium subglobosum LB1	1410327	Eukaryota
TRSP11296.t1	Tricho_longreads_scf.00030_432512	mitochondrial carrier	3.05687e-65	282	Gonapodya prolifera JEL478	1344416	Eukaryota
TRSP11297.t1	Tricho_longreads_scf.00030_432512	hypothetical protein KC19_2G072700	1.21587e-05	327	Ceratodon purpureus	3225	Eukaryota
TRSP11298.t1	Tricho_longreads_scf.00030_432512	hypothetical protein HU200_058000	4.91613e-24	135	Digitaria exilis	1010633	Eukaryota
TRSP11299.t1	Tricho_longreads_scf.00030_432512	---NA---		130	No Blast Hit
TRSP113.t1	Tricho_longreads_scf.01631_13997	hypothetical protein Hyperionvirus2_165	5.01059e-18	120	Hyperionvirus sp.	2487770	Virus
TRSP1130.t1	Tricho_longreads_scf.00086_252263	hypothetical protein ACHHYP_14930	2.09263e-78	508	Achlya hypogyna	1202772	Eukaryota
TRSP11300.t1	Tricho_longreads_scf.00030_432512	dual specificity phosphatase, catalytic domain containing protein	7.86817e-35	453	Acanthamoeba castellanii str. Neff	1257118	Eukaryota
TRSP11301.t1	Tricho_longreads_scf.00030_432512	toxin-antitoxin system YwqK family antitoxin	1.49868e-36	239	Bacteroidetes bacterium	1898104	Bacteria
TRSP11302.t1	Tricho_longreads_scf.00030_432512	hypothetical protein	5.47601e-09	105	Alphaproteobacteria bacterium	1913988	Bacteria
TRSP11303.t1	Tricho_longreads_scf.00030_432512	hypothetical protein F-LCD7_0324	1.25522e-14	209	Faustovirus	1477405	Virus
TRSP11304.t1	Tricho_longreads_scf.00030_432512	---NA---		347	No Blast Hit
TRSP11305.t1	Tricho_longreads_scf.00030_432512	tryptophan 2,3-dioxygenase	1.25304e-72	498	Thecamonas trahens ATCC 50062	461836	Eukaryota
TRSP11306.t1	Tricho_longreads_scf.00030_432512	COP9 signalosome subunit 6, putative	1.21616e-93	333	Acanthamoeba castellanii str. Neff	1257118	Eukaryota
TRSP11307.t1	Tricho_longreads_scf.00030_432512	CS-domain-containing protein	3.06076e-58	176	Lentithecium fluviatile CBS 122367	1168545	Eukaryota
TRSP11308.t1	Tricho_longreads_scf.00030_432512	hypothetical protein DICPUDRAFT_155470	9.48571e-121	534	Dictyostelium purpureum	5786	Eukaryota
TRSP11309.t1	Tricho_longreads_scf.00030_432512	RNA ligase	1.98581e-63	309	Pacmanvirus A23	1932881	Virus
TRSP1131.t1	Tricho_longreads_scf.00086_252263	complex I intermediateassociated CIA30 protein	2.04374e-20	317	Acanthamoeba castellanii str. Neff	1257118	Eukaryota
TRSP11310.t1	Tricho_longreads_scf.00030_432512	lysosomal ProX carboxypeptidase	0	475	Acanthamoeba castellanii str. Neff	1257118	Eukaryota
TRSP11311.t1	Tricho_longreads_scf.00030_432512	DUF1295 domain-containing protein	5.93412e-51	211	Deltaproteobacteria bacterium	2026735	Bacteria
TRSP11312.t1	Tricho_longreads_scf.00030_432512	ubiquitin	5.86037e-16	86	Lambdina fiscellaria nucleopolyhedrovirus	1642929	Virus
TRSP11313.t1	Tricho_longreads_scf.00030_432512	cytoplasmic dynein 1 intermediate chain 2 isoform X12	5.69236e-53	605	Tetranychus urticae	32264	Eukaryota
TRSP11314.t1	Tricho_longreads_scf.00030_432512	predicted protein	2.20832e-166	1093	Monosiga brevicollis MX1	431895	Eukaryota
TRSP11315.t1	Tricho_longreads_scf.00030_432512	toxin-antitoxin system YwqK family antitoxin	6.12596e-33	283	Lutibacter agarilyticus	1109740	Bacteria
TRSP11316.t1	Tricho_longreads_scf.00030_432512	monocyte to macrophage differentiation protein	2.52722e-50	444	Fistulifera solaris	1519565	Eukaryota
TRSP11317.t1	Tricho_longreads_scf.00030_432512	pantoate--beta-alanine ligase	1.05523e-96	285	Chloroflexaceae bacterium	2562117	Bacteria
TRSP11318.t1	Tricho_longreads_scf.00030_432512	3-methyl-2-oxobutanoate hydroxymethyltransferase	0	685	Cavenderia fasciculata	261658	Eukaryota
TRSP11319.t1	Tricho_longreads_scf.00030_432512	---NA---		637	No Blast Hit
TRSP1132.t1	Tricho_longreads_scf.00086_252263	---NA---		97	No Blast Hit
TRSP11320.t1	Tricho_longreads_scf.00030_432512	hypothetical protein SELMODRAFT_446288	3.87579e-146	1062	Selaginella moellendorffii	88036	Eukaryota
TRSP11321.t1	Tricho_longreads_scf.00030_432512	sprT-like domain-containing protein Spartan isoform X1	5.63485e-66	670	Choloepus didactylus	27675	Eukaryota
TRSP11322.t1	Tricho_longreads_scf.00030_432512	hypothetical protein ACA1_137270	1.84086e-25	220	Acanthamoeba castellanii str. Neff	1257118	Eukaryota
TRSP11323.t1	Tricho_longreads_scf.00030_432512	PDZ domain-containing protein	3.48891e-16	387	Planctomycetes bacterium	2026780	Bacteria
TRSP11324.t1	Tricho_longreads_scf.00030_432512	hypothetical protein PROFUN_04849	1.05698e-24	531	Planoprotostelium fungivorum	1890364	Eukaryota
TRSP11325.t1	Tricho_longreads_scf.00030_432512	beta-hexosaminidase subunit beta isoform X1	1.70987e-85	555	Esox lucius	8010	Eukaryota
TRSP11326.t1	Tricho_longreads_scf.00030_432512	---NA---		105	No Blast Hit
TRSP11327.t1	Tricho_longreads_scf.00030_432512	hypothetical protein	5.94986e-133	849	Anaerolineales bacterium	2073117	Bacteria
TRSP11328.t1	Tricho_longreads_scf.00030_432512	DUF692 family protein	5.24397e-67	359	Cyanobacteria bacterium FACHB-471	2692763	Bacteria
TRSP11329.t1	Tricho_longreads_scf.00030_432512	appr-1-p processing	6.16698e-52	237	Thecamonas trahens ATCC 50062	461836	Eukaryota
TRSP1133.t1	Tricho_longreads_scf.00086_252263	putative cation-transporting ATPase	0	1045	Heterostelium album PN500	670386	Eukaryota
TRSP11330.t1	Tricho_longreads_scf.00030_432512	L-2-hydroxyglutarate dehydrogenase, mitochondrial precursor, putative	3.09736e-118	367	Acanthamoeba castellanii str. Neff	1257118	Eukaryota
TRSP11331.t1	Tricho_longreads_scf.00030_432512	predicted protein	2.70149e-39	815	Hordeum vulgare subsp. vulgare	112509	Eukaryota
TRSP11332.t1	Tricho_longreads_scf.00030_432512	hypothetical protein CYY_006644	1.38532e-33	488	Polysphondylium violaceum	133409	Eukaryota
TRSP11333.t1	Tricho_longreads_scf.00030_432512	hypothetical protein PFL1_02527	1.77706e-07	603	Anthracocystis flocculosa	84751	Eukaryota
TRSP11334.t1	Tricho_longreads_scf.00030_432512	autophagy protein 16	4.59968e-130	569	Mucor lusitanicus	29924	Eukaryota
TRSP11335.t1	Tricho_longreads_scf.00030_432512	ATP-dependent zinc metalloprotease FtsH	2.62824e-47	684	candidate division TM6 bacterium GW2011_GWF2_32_72	1619079	Bacteria
TRSP11336.t1	Tricho_longreads_scf.00030_432512	---NA---		591	No Blast Hit
TRSP11337.t1	Tricho_longreads_scf.00030_432512	BTB/POZ domain-containing protein KCTD8	4.54258e-19	224	Trichoplax sp. H2	287889	Eukaryota
TRSP11338.t1	Tricho_longreads_scf.00030_432512	hypothetical protein PEBR_14221	2.88198e-10	678	Penicillium brasilianum	104259	Eukaryota
TRSP11339.t1	Tricho_longreads_scf.00030_432512	toxin-antitoxin system YwqK family antitoxin	4.00939e-70	406	Helicobacter pullorum	35818	Bacteria
TRSP1134.t1	Tricho_longreads_scf.00086_252263	BTB/POZ domain containing protein	1.20515e-64	464	Acanthamoeba castellanii str. Neff	1257118	Eukaryota
TRSP11340.t1	Tricho_longreads_scf.00030_432512	cytochrome P450 81F1-like	2.86783e-49	479	Brassica oleracea var. oleracea	109376	Eukaryota
TRSP11341.t1	Tricho_longreads_scf.00030_432512	hypothetical protein LRAMOSA03643	7.00589e-15	515	Lichtheimia ramosa	688394	Eukaryota
TRSP11342.t1	Tricho_longreads_scf.00030_432512	hypothetical protein	5.98922e-19	396	Candidatus Paracaedibacter symbiosus	244582	Bacteria
TRSP11343.t1	Tricho_longreads_scf.00030_432512	hypothetical protein Ae201684_011194	6.59305e-27	506	Aphanomyces euteiches	100861	Eukaryota
TRSP11344.t1	Tricho_longreads_scf.00030_432512	toxin-antitoxin system YwqK family antitoxin	1.58047e-08	391	Bacteroidales bacterium	2030927	Bacteria
TRSP11345.t1	Tricho_longreads_scf.00030_432512	---NA---		92	No Blast Hit
TRSP11346.t1	Tricho_longreads_scf.00030_432512	Alpha-xylosidase BoGH31A	0	1720	Anaerolineales bacterium	2073117	Bacteria
TRSP11347.t1	Tricho_longreads_scf.00030_432512	Pho13p	4.13232e-67	323	Sugiyamaella lignohabitans	796027	Eukaryota
TRSP11348.t1	Tricho_longreads_scf.00030_432512	box C/D snoRNA protein 1 isoform X2	1.14327e-26	382	Crocodylus porosus	8502	Eukaryota
TRSP11349.t1	Tricho_longreads_scf.00030_432512	---NA---		197	No Blast Hit
TRSP1135.t1	Tricho_longreads_scf.00086_252263	hypothetical protein SAMD00019534_077770	8.56058e-47	886	Acytostelium subglobosum LB1	1410327	Eukaryota
TRSP11350.t1	Tricho_longreads_scf.00030_432512	---NA---		314	No Blast Hit
TRSP11351.t1	Tricho_longreads_scf.00030_432512	class I SAM-dependent methyltransferase	1.47945e-10	265	Cyclobacteriaceae bacterium	2099675	Bacteria
TRSP11352.t1	Tricho_longreads_scf.00030_432512	---NA---		513	No Blast Hit
TRSP11353.t1	Tricho_longreads_scf.00030_432512	MAPEG family protein	2.83468e-25	140	Cyanobacteria bacterium FACHB-472	2692764	Bacteria
TRSP11354.t1	Tricho_longreads_scf.00030_432512	hypothetical protein NA57DRAFT_61267	5.35791e-08	505	Rhizodiscina lignyota	1504668	Eukaryota
TRSP11355.t1	Tricho_longreads_scf.00030_432512	actin depolymerizing factor	1.04504e-25	143	Mucor ambiguus	91626	Eukaryota
TRSP11356.t1	Tricho_longreads_scf.00030_432512	---NA---		353	No Blast Hit
TRSP11357.t1	Tricho_longreads_scf.00030_432512	hypothetical protein ACA1_279620	9.12059e-33	383	Acanthamoeba castellanii str. Neff	1257118	Eukaryota
TRSP11358.t1	Tricho_longreads_scf.00030_432512	hypothetical protein Harvfovirus30_3	2.65166e-42	335	Harvfovirus sp.	2487768	Virus
TRSP11359.t1	Tricho_longreads_scf.00030_432512	---NA---		129	No Blast Hit
TRSP1136.t1	Tricho_longreads_scf.00086_252263	hypothetical protein BDV97DRAFT_334928	1.54168e-21	239	Delphinella strobiligena	147560	Eukaryota
TRSP11360.t1	Tricho_longreads_scf.00030_432512	guanylyl cyclase	7.63456e-117	1800	Planoprotostelium fungivorum	1890364	Eukaryota
TRSP11361.t1	Tricho_longreads_scf.00030_432512	zinc finger, c2h2 type domain containing protein	2.08277e-71	706	Acanthamoeba castellanii str. Neff	1257118	Eukaryota
TRSP11362.t1	Tricho_longreads_scf.00030_432512	hypothetical protein DICPUDRAFT_27582	2.2461e-28	173	Dictyostelium purpureum	5786	Eukaryota
TRSP11363.t1	Tricho_longreads_scf.00030_432512	50S ribosomal protein L2	9.49527e-88	381	Sulfurihydrogenibium sp.	2053621	Bacteria
TRSP11364.t1	Tricho_longreads_scf.00030_432512	serine protease	2.89802e-114	492	Planctomycetes bacterium	2026780	Bacteria
TRSP11365.t1	Tricho_longreads_scf.00030_432512	hypothetical protein PPROV_000756600	1.9908e-11	137	Pycnococcus provasolii	41880	Eukaryota
TRSP11366.t1	Tricho_longreads_scf.00030_432512	---NA---		199	No Blast Hit
TRSP11367.t1	Tricho_longreads_scf.00030_432512	hypothetical protein	3.22009e-98	549	Alphaproteobacteria bacterium	1913988	Bacteria
TRSP11368.t1	Tricho_longreads_scf.00030_432512	---NA---		569	No Blast Hit
TRSP11369.t1	Tricho_longreads_scf.00030_432512	toxin-antitoxin system YwqK family antitoxin	3.63285e-05	212	Chlamydiae bacterium	2081524	Bacteria
TRSP1137.t1	Tricho_longreads_scf.00086_252263	unnamed protein product	9.73612e-09	277	Ectocarpus sp. CCAP 1310/34	867726	Eukaryota
TRSP11370.t1	Tricho_longreads_scf.00030_432512	hypothetical protein	6.65316e-47	405	Algibacter aestuarii	912802	Bacteria
TRSP1138.t1	Tricho_longreads_scf.00086_252263	hypothetical protein DRN11_04615	6.53916e-22	316	Thermoplasmata archaeon	1906666	Archaea
TRSP1139.t1	Tricho_longreads_scf.00086_252263	delta1pyrroline5carboxylate synthetase putative	0	702	Albugo laibachii Nc14	890382	Eukaryota
TRSP114.t1	Tricho_longreads_scf.01631_13997	hypothetical protein FNF29_07525	2.09621e-78	986	Cafeteria roenbergensis	33653	Eukaryota
TRSP1140.t1	Tricho_longreads_scf.00086_252263	hypothetical protein Harvfovirus8_11	4.87707e-76	801	Harvfovirus sp.	2487768	Virus
TRSP1141.t1	Tricho_longreads_scf.00086_252263	hypothetical protein PROFUN_03787	1.07742e-176	713	Planoprotostelium fungivorum	1890364	Eukaryota
TRSP11416.t1	Tricho_longreads_scf.02735_8231	---NA---		307	No Blast Hit
TRSP11417.t1	Tricho_longreads_scf.02735_8231	---NA---		542	No Blast Hit
TRSP1142.t1	Tricho_longreads_scf.00086_252263	cullin C	0	679	Tieghemostelium lacteum	361077	Eukaryota
TRSP1143.t1	Tricho_longreads_scf.00086_252263	---NA---		123	No Blast Hit
TRSP1144.t1	Tricho_longreads_scf.00086_252263	hypothetical protein PROFUN_11200	5.00017e-117	334	Planoprotostelium fungivorum	1890364	Eukaryota
TRSP11441.t1	Tricho_longreads_scf.00363_36747	hypothetical protein	2.88759e-45	522	Chloroflexi bacterium	2026724	Bacteria
TRSP11442.t1	Tricho_longreads_scf.00363_36747	hypothetical protein SAMD00019534_115430	2.48713e-124	277	Acytostelium subglobosum LB1	1410327	Eukaryota
TRSP11443.t1	Tricho_longreads_scf.00363_36747	---NA---		103	No Blast Hit
TRSP11444.t1	Tricho_longreads_scf.00363_36747	---NA---		545	No Blast Hit
TRSP11445.t1	Tricho_longreads_scf.00363_36747	---NA---		423	No Blast Hit
TRSP11446.t1	Tricho_longreads_scf.00363_36747	uncharacterized protein LOC114533409	1.71483e-28	314	Dendronephthya gigantea	151771	Eukaryota
TRSP11447.t1	Tricho_longreads_scf.00363_36747	hypothetical protein CBR_g30595	6.30858e-85	379	Chara braunii	69332	Eukaryota
TRSP11448.t1	Tricho_longreads_scf.00363_36747	MORN repeat protein	3.5806e-17	206	Pacmanvirus A23	1932881	Virus
TRSP11449.t1	Tricho_longreads_scf.00363_36747	---NA---		190	No Blast Hit
TRSP1145.t1	Tricho_longreads_scf.00086_252263	phosphoribosylaminoimidazolesuccinocarboxamide synthase	2.64139e-135	330	Candidatus Marinimicrobia bacterium	2026760	Bacteria
TRSP11450.t1	Tricho_longreads_scf.00363_36747	---NA---		321	No Blast Hit
TRSP11451.t1	Tricho_longreads_scf.00363_36747	VHS and GAT domain containing protein	1.97777e-10	532	Klebsormidium nitens	105231	Eukaryota
TRSP11452.t1	Tricho_longreads_scf.00363_36747	hypothetical protein DICPUDRAFT_59395	1.34001e-101	408	Dictyostelium purpureum	5786	Eukaryota
TRSP11453.t1	Tricho_longreads_scf.00363_36747	Actin/actin-like protein	4.81233e-98	371	Sistotremastrum suecicum HHB10207 ss-3	1314776	Eukaryota
TRSP11454.t1	Tricho_longreads_scf.00363_36747	---NA---		917	No Blast Hit
TRSP11455.t1	Tricho_longreads_scf.00363_36747	cell separation during budding	1.30064e-27	326	Podila epicladia	979697	Eukaryota
TRSP11456.t1	Tricho_longreads_scf.00363_36747	hypothetical protein Glove_192g13	3.72952e-65	240	Diversispora epigaea	1348612	Eukaryota
TRSP1146.t1	Tricho_longreads_scf.00086_252263	hypothetical protein SpCBS45565_g02841	7.60571e-94	3102	Spizellomyces sp. 'palustris'	117820	Eukaryota
TRSP1147.t1	Tricho_longreads_scf.00086_252263	unnamed protein product	8.85341e-20	271	Rotaria sp. Silwood2	2762512	Eukaryota
TRSP11471.t1	Tricho_longreads_scf.00256_59784	syntaxin-8-like	1.15756e-09	106	Plakobranchus ocellatus	259542	Eukaryota
TRSP11472.t1	Tricho_longreads_scf.00256_59784	hypothetical protein CBR_g50687	0	1232	Chara braunii	69332	Eukaryota
TRSP11473.t1	Tricho_longreads_scf.00256_59784	polysaccharide lyase family 7 protein	4.28333e-52	245	Pseudomonas sp. UL073	2809017	Bacteria
TRSP11474.t1	Tricho_longreads_scf.00256_59784	---NA---		164	No Blast Hit
TRSP11475.t1	Tricho_longreads_scf.00256_59784	---NA---		176	No Blast Hit
TRSP11476.t1	Tricho_longreads_scf.00256_59784	Retrovirus-related Pol polyprotein	1.3284e-66	441	Stylophora pistillata	50429	Eukaryota
TRSP11477.t1	Tricho_longreads_scf.00256_59784	Transposon Ty3-I Gag-Pol polyprotein	1.68541e-108	511	Exaiptasia diaphana	2652724	Eukaryota
TRSP11478.t1	Tricho_longreads_scf.00256_59784	hypothetical protein BOX15_Mlig028617g14, partial	8.10554e-20	777	Macrostomum lignano	282301	Eukaryota
TRSP11479.t1	Tricho_longreads_scf.00256_59784	---NA---		187	No Blast Hit
TRSP1148.t1	Tricho_longreads_scf.00086_252263	Fructose-6-phosphate-2-kinase	4.98639e-173	544	Heterostelium album PN500	670386	Eukaryota
TRSP11480.t1	Tricho_longreads_scf.00256_59784	lectin L6-like	6.39565e-26	372	Asterias rubens	7604	Eukaryota
TRSP11481.t1	Tricho_longreads_scf.00256_59784	hypothetical protein	1.31395e-72	422	Tupanvirus soda lake	2126985	Virus
TRSP11482.t1	Tricho_longreads_scf.00256_59784	hypothetical protein	7.01093e-08	1384	Bacteroidia bacterium	2044936	Bacteria
TRSP11483.t1	Tricho_longreads_scf.00256_59784	hypothetical protein CAOG_05572	3.68664e-136	565	Capsaspora owczarzaki ATCC 30864	595528	Eukaryota
TRSP11484.t1	Tricho_longreads_scf.00256_59784	hypothetical protein FDP41_008965	6.9468e-89	489	Naegleria fowleri	5763	Eukaryota
TRSP11485.t1	Tricho_longreads_scf.00256_59784	hypothetical protein	1.44366e-48	323	Gemmatimonadetes bacterium	2026742	Bacteria
TRSP11486.t1	Tricho_longreads_scf.00256_59784	---NA---		216	No Blast Hit
TRSP11487.t1	Tricho_longreads_scf.00256_59784	---NA---		389	No Blast Hit
TRSP11488.t1	Tricho_longreads_scf.00256_59784	predicted protein	1.59304e-21	821	Naegleria gruberi	5762	Eukaryota
TRSP11489.t1	Tricho_longreads_scf.00256_59784	---NA---		337	No Blast Hit
TRSP1149.t1	Tricho_longreads_scf.00086_252263	benzoate-CoA ligase family protein	3.98756e-39	608	Candidatus Tectomicrobia bacterium	2528274	Bacteria
TRSP11490.t1	Tricho_longreads_scf.00256_59784	polysaccharide lyase family 7 protein	8.16421e-48	332	Pseudomonas sp. UL073	2809017	Bacteria
TRSP11491.t1	Tricho_longreads_scf.00256_59784	Frizzled/Smoothened family membrane region protein	0.00045615	536	Acanthamoeba castellanii str. Neff	1257118	Eukaryota
TRSP115.t1	Tricho_longreads_scf.01631_13997	hypothetical protein Harvfovirus8_11	3.84188e-65	389	Harvfovirus sp.	2487768	Virus
TRSP1150.t1	Tricho_longreads_scf.00086_252263	vacuolar protein sorting-associated protein 2 homolog 1-like	3.56305e-81	219	Juglans regia	51240	Eukaryota
TRSP1151.t1	Tricho_longreads_scf.00086_252263	BUD13 homolog	4.19414e-49	479	Branchiostoma floridae	7739	Eukaryota
TRSP1152.t1	Tricho_longreads_scf.00086_252263	pyridoxal kinase	6.62976e-89	283	Cynoglossus semilaevis	244447	Eukaryota
TRSP1153.t1	Tricho_longreads_scf.00086_252263	Factin-capping protein subunit beta, putative	1.17732e-135	271	Acanthamoeba castellanii str. Neff	1257118	Eukaryota
TRSP1154.t1	Tricho_longreads_scf.00086_252263	unnamed protein product	2.20996e-115	380	Rotaria sp. Silwood2	2762512	Eukaryota
TRSP1155.t1	Tricho_longreads_scf.00086_252263	U-box domain-containing protein 4-like isoform X1	7.2451e-11	444	Chenopodium quinoa	63459	Eukaryota
TRSP1156.t1	Tricho_longreads_scf.00086_252263	serine/threonine-protein kinase STY17	1.98366e-48	326	Morus notabilis	981085	Eukaryota
TRSP1157.t1	Tricho_longreads_scf.00086_252263	---NA---		154	No Blast Hit
TRSP1158.t1	Tricho_longreads_scf.00086_252263	CALMS protein	5.53491e-33	138	Sapayoa aenigma	239371	Eukaryota
TRSP1159.t1	Tricho_longreads_scf.00086_252263	hypothetical protein Mapa_005008	1.68621e-151	331	Marchantia paleacea	56867	Eukaryota
TRSP116.t1	Tricho_longreads_scf.01631_13997	toxin-antitoxin system YwqK family antitoxin	5.51388e-12	135	Bacteroidales bacterium	2030927	Bacteria
TRSP1160.t1	Tricho_longreads_scf.00086_252263	unnamed protein product	9.03142e-30	258	Rotaria sp. Silwood2	2762512	Eukaryota
TRSP1161.t1	Tricho_longreads_scf.00086_252263	RING zinc finger-containing protein	8.65145e-23	278	Tieghemostelium lacteum	361077	Eukaryota
TRSP1162.t1	Tricho_longreads_scf.00086_252263	---NA---		388	No Blast Hit
TRSP1163.t1	Tricho_longreads_scf.00086_252263	---NA---		214	No Blast Hit
TRSP1164.t1	Tricho_longreads_scf.00086_252263	---NA---		757	No Blast Hit
TRSP1165.t1	Tricho_longreads_scf.00086_252263	---NA---		864	No Blast Hit
TRSP11701.t1	Tricho_longreads_scf.00224_82319	F-box domain protein	1.78865e-28	312	Indivirus ILV1	1977633	Virus
TRSP11702.t1	Tricho_longreads_scf.00224_82319	---NA---		364	No Blast Hit
TRSP11703.t1	Tricho_longreads_scf.00224_82319	---NA---		95	No Blast Hit
TRSP11704.t1	Tricho_longreads_scf.00224_82319	---NA---		421	No Blast Hit
TRSP11705.t1	Tricho_longreads_scf.00224_82319	toxin-antitoxin system YwqK family antitoxin	2.3856e-29	261	Lutibacter agarilyticus	1109740	Bacteria
TRSP11706.t1	Tricho_longreads_scf.00224_82319	---NA---		101	No Blast Hit
TRSP11707.t1	Tricho_longreads_scf.00224_82319	---NA---		146	No Blast Hit
TRSP11708.t1	Tricho_longreads_scf.00224_82319	hypothetical protein Hyperionvirus6_87	3.4312e-08	72	Hyperionvirus sp.	2487770	Virus
TRSP11709.t1	Tricho_longreads_scf.00224_82319	ATP-dependent DNA/RNA helicase DHX36 isoform X1	0	1290	Nematostella vectensis	45351	Eukaryota
TRSP11710.t1	Tricho_longreads_scf.00224_82319	hypothetical protein GUITHDRAFT_163003	4.70146e-11	300	Guillardia theta CCMP2712	905079	Eukaryota
TRSP11711.t1	Tricho_longreads_scf.00224_82319	Armadillo/betacatenin-like repeat domain containing protein	2.0491e-49	641	Acanthamoeba castellanii str. Neff	1257118	Eukaryota
TRSP11712.t1	Tricho_longreads_scf.00224_82319	DUF2135 domain-containing protein	4.43772e-43	1456	Acidobacteria bacterium	1978231	Bacteria
TRSP11713.t1	Tricho_longreads_scf.00224_82319	F-box domain protein	1.00454e-19	289	Indivirus ILV1	1977633	Virus
TRSP11714.t1	Tricho_longreads_scf.00224_82319	hypothetical protein	1.05216e-60	316	Myxococcales bacterium	2026763	Bacteria
TRSP11715.t1	Tricho_longreads_scf.00224_82319	endonuclease/exonuclease/phosphatase family protein	1.16573e-59	349	Acanthamoeba castellanii str. Neff	1257118	Eukaryota
TRSP11716.t1	Tricho_longreads_scf.00224_82319	---NA---		741	No Blast Hit
TRSP11717.t1	Tricho_longreads_scf.00224_82319	---NA---		137	No Blast Hit
TRSP11718.t1	Tricho_longreads_scf.00224_82319	amino acid ABC transporter substrate-binding protein	5.99019e-18	655	Chloroflexi bacterium	2026724	Bacteria
TRSP11719.t1	Tricho_longreads_scf.00224_82319	---NA---		426	No Blast Hit
TRSP11720.t1	Tricho_longreads_scf.00224_82319	ankyrin repeat domain-containing protein	3.56989e-41	617	Thermofilum sp.	1961369	Archaea
TRSP11721.t1	Tricho_longreads_scf.00224_82319	5-formyltetrahydrofolate cyclo-ligase	2.9868e-39	826	Armillaria solidipes	1076256	Eukaryota
TRSP11722.t1	Tricho_longreads_scf.00224_82319	thiamine biosynthesis protein ThiJ	1.33131e-67	462	Streptomyces sp.	1931	Bacteria
TRSP11723.t1	Tricho_longreads_scf.00224_82319	hypothetical protein CAOG_05078	2.76362e-19	575	Capsaspora owczarzaki ATCC 30864	595528	Eukaryota
TRSP11724.t1	Tricho_longreads_scf.00224_82319	---NA---		425	No Blast Hit
TRSP11725.t1	Tricho_longreads_scf.00224_82319	MORN-repeat protein	1.02577e-05	283	Orpheovirus IHUMI-LCC2	2023057	Virus
TRSP11726.t1	Tricho_longreads_scf.00224_82319	---NA---		359	No Blast Hit
TRSP11727.t1	Tricho_longreads_scf.00224_82319	toxin-antitoxin system YwqK family antitoxin	3.70329e-22	197	Porphyromonas levii	28114	Bacteria
TRSP11728.t1	Tricho_longreads_scf.00224_82319	protein MIS12 homolog	3.07564e-06	231	Nelumbo nucifera	4432	Eukaryota
TRSP11729.t1	Tricho_longreads_scf.00224_82319	---NA---		141	No Blast Hit
TRSP11730.t1	Tricho_longreads_scf.00224_82319	---NA---		300	No Blast Hit
TRSP11731.t1	Tricho_longreads_scf.00224_82319	---NA---		205	No Blast Hit
TRSP11732.t1	Tricho_longreads_scf.00224_82319	---NA---		133	No Blast Hit
TRSP11733.t1	Tricho_longreads_scf.00224_82319	hypothetical protein LOTGIDRAFT_133032	1.02295e-16	547	Lottia gigantea	225164	Eukaryota
TRSP11754.t1	Tricho_longreads_scf.00278_52651	---NA---		56	No Blast Hit
TRSP11755.t1	Tricho_longreads_scf.00278_52651	---NA---		375	No Blast Hit
TRSP11756.t1	Tricho_longreads_scf.00278_52651	---NA---		253	No Blast Hit
TRSP11757.t1	Tricho_longreads_scf.00278_52651	protein tyrosine kinase	2.47058e-05	347	Cavenderia fasciculata	261658	Eukaryota
TRSP11758.t1	Tricho_longreads_scf.00278_52651	hypothetical protein GWI33_020158	2.75811e-100	490	Rhynchophorus ferrugineus	354439	Eukaryota
TRSP11759.t1	Tricho_longreads_scf.00278_52651	arginase	1.09562e-71	348	Chloroflexi bacterium	2026724	Bacteria
TRSP11760.t1	Tricho_longreads_scf.00278_52651	calpain family cysteine protease domain containing protein	4.45984e-52	1348	Acanthamoeba castellanii str. Neff	1257118	Eukaryota
TRSP11761.t1	Tricho_longreads_scf.00278_52651	---NA---		549	No Blast Hit
TRSP11762.t1	Tricho_longreads_scf.00278_52651	---NA---		619	No Blast Hit
TRSP11763.t1	Tricho_longreads_scf.00278_52651	glutamine cyclotransferase	2.87169e-62	454	Caldithrix sp. RBG_13_44_9	1797576	Bacteria
TRSP11764.t1	Tricho_longreads_scf.00278_52651	probable ADP-ribosylation factor GTPase-activating protein AGD15	1.75581e-23	122	Prunus dulcis	3755	Eukaryota
TRSP11765.t1	Tricho_longreads_scf.00278_52651	peptidyl-prolyl cis-trans isomerase	4.25645e-65	379	Phycisphaerales bacterium	2052180	Bacteria
TRSP11766.t1	Tricho_longreads_scf.00278_52651	Cell surface glycoprotein 1	8.91008e-88	1048	Nymphon striatum	424472	Eukaryota
TRSP11767.t1	Tricho_longreads_scf.00278_52651	hypothetical protein Harvfovirus20_10	4.33005e-42	405	Harvfovirus sp.	2487768	Virus
TRSP11768.t1	Tricho_longreads_scf.00278_52651	hypothetical protein Harvfovirus20_10	2.8894e-40	346	Harvfovirus sp.	2487768	Virus
TRSP11769.t1	Tricho_longreads_scf.00278_52651	Ras GTPase	9.34786e-79	185	Dictyostelium discoideum	44689	Eukaryota
TRSP11770.t1	Tricho_longreads_scf.00278_52651	ras-like protein	3.17229e-63	186	Coemansia reversa NRRL 1564	763665	Eukaryota
TRSP11771.t1	Tricho_longreads_scf.00278_52651	rab family GTPase	5.43892e-45	202	Raphidocelis subcapitata	307507	Eukaryota
TRSP11772.t1	Tricho_longreads_scf.00278_52651	---NA---		263	No Blast Hit
TRSP11773.t1	Tricho_longreads_scf.00278_52651	---NA---		526	No Blast Hit
TRSP11774.t1	Tricho_longreads_scf.00278_52651	---NA---		536	No Blast Hit
TRSP11798.t1	Tricho_longreads_scf.01512_14756	hypothetical protein	1.70125e-07	482	Simkania negevensis	83561	Bacteria
TRSP11799.t1	Tricho_longreads_scf.01512_14756	Hypothetical protein, putative	7.41172e-14	205	Bodo saltans	75058	Eukaryota
TRSP11800.t1	Tricho_longreads_scf.01512_14756	---NA---		136	No Blast Hit
TRSP11801.t1	Tricho_longreads_scf.01512_14756	---NA---		116	No Blast Hit
TRSP11802.t1	Tricho_longreads_scf.01512_14756	---NA---		125	No Blast Hit
TRSP11803.t1	Tricho_longreads_scf.01512_14756	malate dehydrogenase	9.12597e-70	205	Heterostelium album PN500	670386	Eukaryota
TRSP11804.t1	Tricho_longreads_scf.00494_28975	---NA---		199	No Blast Hit
TRSP11805.t1	Tricho_longreads_scf.00494_28975	---NA---		104	No Blast Hit
TRSP11806.t1	Tricho_longreads_scf.00494_28975	uncharacterized protein DKFZp434B061-like	1.21393e-26	485	Petromyzon marinus	7757	Eukaryota
TRSP11807.t1	Tricho_longreads_scf.00494_28975	WW domain-containing oxidoreductase	3.02786e-73	322	Auxenochlorella protothecoides	3075	Eukaryota
TRSP11808.t1	Tricho_longreads_scf.00494_28975	MORN-repeat protein	7.11555e-10	184	Orpheovirus IHUMI-LCC2	2023057	Virus
TRSP11809.t1	Tricho_longreads_scf.00494_28975	ras-related protein Rab-10-like	1.62907e-15	176	Crassostrea virginica	6565	Eukaryota
TRSP11810.t1	Tricho_longreads_scf.00494_28975	cellulose 1,4-beta-cellobiosidase	9.15406e-106	391	Deltaproteobacteria bacterium	2026735	Bacteria
TRSP11811.t1	Tricho_longreads_scf.00494_28975	hypothetical protein Harvfovirus20_10	3.63768e-52	492	Harvfovirus sp.	2487768	Virus
TRSP11812.t1	Tricho_longreads_scf.00494_28975	hypothetical protein EMIHUDRAFT_230887	6.24232e-75	333	Emiliania huxleyi CCMP1516	280463	Eukaryota
TRSP11813.t1	Tricho_longreads_scf.00494_28975	hypothetical protein AMSG_04935	1.28637e-36	300	Thecamonas trahens ATCC 50062	461836	Eukaryota
TRSP11814.t1	Tricho_longreads_scf.00494_28975	peptide-methionine (R)-S-oxide reductase MsrB	5.85844e-52	256	Spirulina sp. SIO3F2	2607816	Bacteria
TRSP11815.t1	Tricho_longreads_scf.00494_28975	hypothetical protein PIROE2DRAFT_13916	6.64704e-41	262	Piromyces sp. E2	73868	Eukaryota
TRSP11816.t1	Tricho_longreads_scf.00494_28975	hypothetical protein PROFUN_02928	2.73476e-85	388	Planoprotostelium fungivorum	1890364	Eukaryota
TRSP11817.t1	Tricho_longreads_scf.00494_28975	hypothetical protein ERJ69_05860	2.80489e-49	772	Aphanocapsa feldmannii 288cV	2507555	Bacteria
TRSP11818.t1	Tricho_longreads_scf.00494_28975	---NA---		77	No Blast Hit
TRSP11819.t1	Tricho_longreads_scf.00494_28975	ammonium transporter 1;2	2.73098e-57	286	Dunaliella salina	3046	Eukaryota
TRSP11844.t1	Tricho_longreads_scf.00090_235661	sialate O-acetylesterase-like	6.5794e-48	659	Octopus sinensis	2607531	Eukaryota
TRSP11845.t1	Tricho_longreads_scf.00090_235661	glycoside hydrolase family protein	9.31465e-06	105	Formosa agariphila	320324	Bacteria
TRSP11846.t1	Tricho_longreads_scf.00090_235661	hypothetical protein	3.11069e-73	476	Algibacter aestuarii	912802	Bacteria
TRSP11847.t1	Tricho_longreads_scf.00090_235661	---NA---		459	No Blast Hit
TRSP11848.t1	Tricho_longreads_scf.00090_235661	hypothetical protein INT43_007804	3.22183e-75	314	Umbelopsis isabellina	91625	Eukaryota
TRSP11849.t1	Tricho_longreads_scf.00090_235661	stage V sporulation protein K	3.03187e-56	812	Thecamonas trahens ATCC 50062	461836	Eukaryota
TRSP11850.t1	Tricho_longreads_scf.00090_235661	---NA---		581	No Blast Hit
TRSP11851.t1	Tricho_longreads_scf.00090_235661	hypothetical protein BDN72DRAFT_761725	2.35515e-18	389	Pluteus cervinus	181527	Eukaryota
TRSP11852.t1	Tricho_longreads_scf.00090_235661	---NA---		208	No Blast Hit
TRSP11853.t1	Tricho_longreads_scf.00090_235661	Putative Ras-like protein Rab7	2.70534e-25	85	Rhizopus microsporus	58291	Eukaryota
TRSP11854.t1	Tricho_longreads_scf.00090_235661	VWA domain-containing protein	6.66989e-112	882	Holophagales bacterium	2478486	Bacteria
TRSP11855.t1	Tricho_longreads_scf.00090_235661	---NA---		252	No Blast Hit
TRSP11856.t1	Tricho_longreads_scf.00090_235661	---NA---		446	No Blast Hit
TRSP11857.t1	Tricho_longreads_scf.00090_235661	---NA---		245	No Blast Hit
TRSP11858.t1	Tricho_longreads_scf.00090_235661	hypothetical protein CYY_008522	4.23128e-62	345	Polysphondylium violaceum	133409	Eukaryota
TRSP11859.t1	Tricho_longreads_scf.00090_235661	hypothetical protein BBJ28_00011986	7.73613e-35	836	Nothophytophthora sp. Chile5	2483409	Eukaryota
TRSP11860.t1	Tricho_longreads_scf.00090_235661	---NA---		518	No Blast Hit
TRSP11861.t1	Tricho_longreads_scf.00090_235661	ankyrin repeat domain-containing protein	6.83775e-10	661	Thermoguttaceae bacterium	2691551	Bacteria
TRSP11862.t1	Tricho_longreads_scf.00090_235661	peroxisome biogenesis factor 1-like isoform X3	2.00251e-148	1017	Orbicella faveolata	48498	Eukaryota
TRSP11863.t1	Tricho_longreads_scf.00090_235661	hypothetical protein	1.53578e-122	720	Calycomorphotria hydatis	2528027	Bacteria
TRSP11864.t1	Tricho_longreads_scf.00090_235661	hypothetical protein	2.20145e-24	247	Armatimonadetes bacterium	2033014	Bacteria
TRSP11865.t1	Tricho_longreads_scf.00090_235661	RICIN domain-containing protein	1.11858e-14	171	Fulvivirga sp. M361	2594266	Bacteria
TRSP11866.t1	Tricho_longreads_scf.00090_235661	small GTP-binding protein of Ran family	3.01396e-62	189	Cyanidioschyzon merolae strain 10D	280699	Eukaryota
TRSP11867.t1	Tricho_longreads_scf.00090_235661	---NA---		215	No Blast Hit
TRSP11868.t1	Tricho_longreads_scf.00090_235661	protein kinase domain containing protein	1.00047e-41	862	Acanthamoeba castellanii str. Neff	1257118	Eukaryota
TRSP11869.t1	Tricho_longreads_scf.00090_235661	---NA---		205	No Blast Hit
TRSP11870.t1	Tricho_longreads_scf.00090_235661	---NA---		260	No Blast Hit
TRSP11871.t1	Tricho_longreads_scf.00090_235661	hypothetical protein CYY_006213	4.88447e-17	608	Polysphondylium violaceum	133409	Eukaryota
TRSP11872.t1	Tricho_longreads_scf.00090_235661	hypothetical protein H310_13978	5.02901e-33	319	Aphanomyces invadans	157072	Eukaryota
TRSP11873.t1	Tricho_longreads_scf.00090_235661	hypothetical protein Ctob_015916	1.45203e-99	604	Chrysochromulina tobinii	1460289	Eukaryota
TRSP11874.t1	Tricho_longreads_scf.00090_235661	RhoGEF domain containing protein	5.79751e-29	892	Acanthamoeba castellanii str. Neff	1257118	Eukaryota
TRSP11875.t1	Tricho_longreads_scf.00090_235661	unnamed protein product	2.24532e-20	436	Rotaria socialis	392032	Eukaryota
TRSP11876.t1	Tricho_longreads_scf.00090_235661	hypothetical protein Harvfovirus8_11	7.49162e-58	803	Harvfovirus sp.	2487768	Virus
TRSP11877.t1	Tricho_longreads_scf.00090_235661	---NA---		400	No Blast Hit
TRSP11878.t1	Tricho_longreads_scf.00090_235661	phospholipase A-2-activating protein-like	3.90782e-18	648	Panicum virgatum	38727	Eukaryota
TRSP11879.t1	Tricho_longreads_scf.00090_235661	ras-related C3 botulinum toxin substrate 1 isoform X1	3.98071e-58	212	Bactrocera oleae	104688	Eukaryota
TRSP11880.t1	Tricho_longreads_scf.00090_235661	toxin-antitoxin system YwqK family antitoxin	1.56021e-76	584	Candidatus Thioglobus sp. NP1	2508687	Bacteria
TRSP11881.t1	Tricho_longreads_scf.00090_235661	---NA---		79	No Blast Hit
TRSP11882.t1	Tricho_longreads_scf.00090_235661	cellulase family glycosylhydrolase	3.30899e-74	484	Stigonema ocellatum SAG 48.90 = DSM 106950	221294	Bacteria
TRSP11883.t1	Tricho_longreads_scf.00090_235661	---NA---		104	No Blast Hit
TRSP11884.t1	Tricho_longreads_scf.00090_235661	hypothetical protein ES288_D11G324700v1	8.24766e-106	694	Gossypium darwinii	34276	Eukaryota
TRSP11885.t1	Tricho_longreads_scf.00090_235661	Sphingomyelin phosphodiesterase-like protein	1.81698e-33	509	Globisporangium splendens	82926	Eukaryota
TRSP11886.t1	Tricho_longreads_scf.00090_235661	---NA---		711	No Blast Hit
TRSP11887.t1	Tricho_longreads_scf.00090_235661	VOC family protein	4.86137e-12	131	Limimonas halophila	1082479	Bacteria
TRSP11888.t1	Tricho_longreads_scf.00090_235661	rho-related GTP-binding protein RhoD isoform X1	2.62388e-29	191	Manis pentadactyla	143292	Eukaryota
TRSP11889.t1	Tricho_longreads_scf.00090_235661	laminin-like protein epi-1	2.49653e-19	467	Actinia tenebrosa	6105	Eukaryota
TRSP11890.t1	Tricho_longreads_scf.00090_235661	dual specificity protein phosphatase 18-like	1.4282e-22	302	Gigantopelta aegis	1735272	Eukaryota
TRSP11891.t1	Tricho_longreads_scf.00090_235661	---NA---		587	No Blast Hit
TRSP11892.t1	Tricho_longreads_scf.00090_235661	hypothetical protein DDB_G0289199	3.70656e-65	1035	Dictyostelium discoideum AX4	352472	Eukaryota
TRSP11893.t1	Tricho_longreads_scf.00090_235661	laminin-like protein epi-1	8.27547e-18	710	Actinia tenebrosa	6105	Eukaryota
TRSP11894.t1	Tricho_longreads_scf.00090_235661	hypothetical protein EJ06DRAFT_514848	6.60589e-23	162	Trichodelitschia bisporula	703511	Eukaryota
TRSP11895.t1	Tricho_longreads_scf.00090_235661	hypothetical protein	3.00355e-86	551	Candidatus Heimdallarchaeota archaeon	2026747	Archaea
TRSP11896.t1	Tricho_longreads_scf.00090_235661	MORN repeat protein	1.79988e-09	118	Pacmanvirus A23	1932881	Virus
TRSP11897.t1	Tricho_longreads_scf.00090_235661	trypsin-like peptidase domain-containing protein	5.0703e-32	904	Flavobacterium sp. J27	2060419	Bacteria
TRSP11898.t1	Tricho_longreads_scf.00090_235661	IPT/TIG domain-containing protein	2.40036e-13	304	Acidobacteria bacterium	1978231	Bacteria
TRSP11899.t1	Tricho_longreads_scf.00090_235661	predicted protein	9.46844e-06	399	Trichoplax adhaerens	10228	Eukaryota
TRSP11900.t1	Tricho_longreads_scf.00090_235661	p21-activated protein kinase-interacting protein 1-like	8.27994e-29	442	Lingula anatina	7574	Eukaryota
TRSP11901.t1	Tricho_longreads_scf.00090_235661	dihydrodipicolinate synthase family protein	1.124e-50	281	Firmicutes bacterium	1879010	Bacteria
TRSP11902.t1	Tricho_longreads_scf.00090_235661	hypothetical protein ACA1_360970	1.5253e-14	813	Acanthamoeba castellanii str. Neff	1257118	Eukaryota
TRSP11903.t1	Tricho_longreads_scf.00090_235661	unnamed protein product	1.14864e-36	83	Rotaria sordida	392033	Eukaryota
TRSP11904.t1	Tricho_longreads_scf.00090_235661	---NA---		225	No Blast Hit
TRSP11905.t1	Tricho_longreads_scf.00090_235661	ExeM/NucH family extracellular endonuclease	2.9484e-12	224	Oscillatoriales cyanobacterium RM2_1_1	2720435	Bacteria
TRSP11906.t1	Tricho_longreads_scf.00090_235661	maleylacetoacetate isomerase-like	1.18349e-76	228	Crassostrea virginica	6565	Eukaryota
TRSP11907.t1	Tricho_longreads_scf.00090_235661	uncharacterized protein LOC117307424	1.0006e-08	211	Asterias rubens	7604	Eukaryota
TRSP11908.t1	Tricho_longreads_scf.00090_235661	epidermal retinol dehydrogenase 2-like	1.79816e-65	292	Asterias rubens	7604	Eukaryota
TRSP11909.t1	Tricho_longreads_scf.00090_235661	---NA---		168	No Blast Hit
TRSP11910.t1	Tricho_longreads_scf.00090_235661	zea mays protein disulfide isomerase	1.12173e-119	361	Thecamonas trahens ATCC 50062	461836	Eukaryota
TRSP11911.t1	Tricho_longreads_scf.00090_235661	bolA-like protein DDB_G0274169 isoform X2	1.44491e-24	189	Amyelois transitella	680683	Eukaryota
TRSP11912.t1	Tricho_longreads_scf.00090_235661	---NA---		406	No Blast Hit
TRSP11913.t1	Tricho_longreads_scf.00090_235661	hypothetical protein CAOG_05078	4.26402e-97	1482	Capsaspora owczarzaki ATCC 30864	595528	Eukaryota
TRSP11914.t1	Tricho_longreads_scf.00090_235661	hypothetical protein PROFUN_00201	4.13598e-107	480	Planoprotostelium fungivorum	1890364	Eukaryota
TRSP11915.t1	Tricho_longreads_scf.00090_235661	hypothetical protein Hyperionvirus6_11	8.72413e-11	263	Hyperionvirus sp.	2487770	Virus
TRSP11916.t1	Tricho_longreads_scf.00090_235661	hypothetical protein Harvfovirus36_1, partial	4.42451e-65	367	Harvfovirus sp.	2487768	Virus
TRSP11917.t1	Tricho_longreads_scf.00090_235661	hypothetical protein SAMD00019534_042580, partial	1.81358e-38	374	Acytostelium subglobosum LB1	1410327	Eukaryota
TRSP11918.t1	Tricho_longreads_scf.00090_235661	hypothetical protein	4.38403e-39	529	Brockia lithotrophica	933949	Bacteria
TRSP11919.t1	Tricho_longreads_scf.00090_235661	trypsin-like peptidase domain-containing protein	2.11493e-28	903	Flavobacterium sp. J27	2060419	Bacteria
TRSP11920.t1	Tricho_longreads_scf.00090_235661	hypothetical protein	1.13007e-10	272	Paraburkholderia hiiakae	1081782	Bacteria
TRSP11921.t1	Tricho_longreads_scf.00090_235661	---NA---		335	No Blast Hit
TRSP11922.t1	Tricho_longreads_scf.00090_235661	hypothetical protein FDP41_013488	2.27861e-27	635	Naegleria fowleri	5763	Eukaryota
TRSP11923.t1	Tricho_longreads_scf.00090_235661	trypsin-like peptidase domain-containing protein	1.7746e-31	896	Flavobacterium sp. J27	2060419	Bacteria
TRSP11924.t1	Tricho_longreads_scf.00090_235661	trypsin-like peptidase domain-containing protein	7.60239e-31	897	Flavobacterium sp. J27	2060419	Bacteria
TRSP11925.t1	Tricho_longreads_scf.00090_235661	trypsin-like peptidase domain-containing protein	7.54963e-31	894	Flavobacterium sp. J27	2060419	Bacteria
TRSP11926.t1	Tricho_longreads_scf.00090_235661	hypothetical protein Ae201684_017049	6.79966e-54	224	Aphanomyces euteiches	100861	Eukaryota
TRSP11927.t1	Tricho_longreads_scf.00090_235661	hypothetical protein Harvfovirus30_3	3.29065e-43	321	Harvfovirus sp.	2487768	Virus
TRSP11928.t1	Tricho_longreads_scf.00090_235661	stress-induced-phosphoprotein 1	1.87014e-25	416	Hippocampus comes	109280	Eukaryota
TRSP11929.t1	Tricho_longreads_scf.00090_235661	T9SS C-terminal target domain-containing protein	2.03737e-08	389	Ignavibacteriales bacterium	2049428	Bacteria
TRSP11930.t1	Tricho_longreads_scf.00090_235661	PREDICTED: uncharacterized protein LOC106078491 isoform X1	1.17749e-10	261	Biomphalaria glabrata	6526	Eukaryota
TRSP11931.t1	Tricho_longreads_scf.00090_235661	hypothetical protein UABAM_04945	1.97416e-56	418	Planctomycetes bacterium SRT547	2596890	Bacteria
TRSP11932.t1	Tricho_longreads_scf.00090_235661	sodium:solute symporter family protein	1.52193e-66	579	Luminiphilus sp.	2590574	Bacteria
TRSP11933.t1	Tricho_longreads_scf.00090_235661	serine carboxypeptidase 24-like	4.4737e-87	313	Physcomitrium patens	3218	Eukaryota
TRSP11943.t1	Tricho_longreads_scf.00067_272662	PREDICTED: uncharacterized protein LOC107345209	4.47e-19	288	Acropora digitifera	70779	Eukaryota
TRSP11944.t1	Tricho_longreads_scf.00067_272662	hypothetical protein FDP41_008466	8.58229e-48	193	Naegleria fowleri	5763	Eukaryota
TRSP11945.t1	Tricho_longreads_scf.00067_272662	hypothetical protein Catovirus_1_618	6.16828e-49	406	Catovirus CTV1	1977631	Virus
TRSP11946.t1	Tricho_longreads_scf.00067_272662	hypothetical protein	3.2304e-11	255	Bacteroidia bacterium	2044936	Bacteria
TRSP11947.t1	Tricho_longreads_scf.00067_272662	unnamed protein product	4.15486e-15	253	Rotaria sp. Silwood2	2762512	Eukaryota
TRSP11948.t1	Tricho_longreads_scf.00067_272662	---NA---		426	No Blast Hit
TRSP11949.t1	Tricho_longreads_scf.00067_272662	---NA---		405	No Blast Hit
TRSP11950.t1	Tricho_longreads_scf.00067_272662	hypothetical protein A2029_16210	1.82642e-08	378	Chloroflexi bacterium RBG_19FT_COMBO_47_9	1797665	Bacteria
TRSP11951.t1	Tricho_longreads_scf.00067_272662	---NA---		164	No Blast Hit
TRSP11952.t1	Tricho_longreads_scf.00067_272662	---NA---		134	No Blast Hit
TRSP11953.t1	Tricho_longreads_scf.00067_272662	---NA---		526	No Blast Hit
TRSP11954.t1	Tricho_longreads_scf.00067_272662	serine/threonine-protein kinase CTR1 isoform X2	1.30723e-49	679	Selaginella moellendorffii	88036	Eukaryota
TRSP11955.t1	Tricho_longreads_scf.00067_272662	---NA---		255	No Blast Hit
TRSP11956.t1	Tricho_longreads_scf.00067_272662	hypothetical protein Catovirus_1_601	2.70803e-39	238	Catovirus CTV1	1977631	Virus
TRSP11957.t1	Tricho_longreads_scf.00067_272662	probable beta-D-xylosidase 7 isoform X2	0	727	Chelonia mydas	8469	Eukaryota
TRSP11958.t1	Tricho_longreads_scf.00067_272662	hypothetical protein Harvfovirus36_1, partial	4.05993e-35	253	Harvfovirus sp.	2487768	Virus
TRSP11959.t1	Tricho_longreads_scf.00067_272662	hypothetical protein BE17_31715	8.48293e-60	296	Sorangium cellulosum	56	Bacteria
TRSP11960.t1	Tricho_longreads_scf.00067_272662	unnamed protein product	3.72325e-05	72	Naegleria fowleri	5763	Eukaryota
TRSP11961.t1	Tricho_longreads_scf.00067_272662	---NA---		122	No Blast Hit
TRSP11962.t1	Tricho_longreads_scf.00067_272662	---NA---		174	No Blast Hit
TRSP11963.t1	Tricho_longreads_scf.00067_272662	hypothetical protein Catovirus_1_560	9.17256e-12	155	Catovirus CTV1	1977631	Virus
TRSP11964.t1	Tricho_longreads_scf.00067_272662	---NA---		153	No Blast Hit
TRSP11965.t1	Tricho_longreads_scf.00067_272662	toxin-antitoxin system YwqK family antitoxin	9.75343e-56	346	Helicobacter pullorum	35818	Bacteria
TRSP11966.t1	Tricho_longreads_scf.00067_272662	basic proline-rich protein-like	3.23075e-08	440	Asterias rubens	7604	Eukaryota
TRSP11967.t1	Tricho_longreads_scf.00067_272662	mucin 91C	1.96372e-16	362	Planoprotostelium fungivorum	1890364	Eukaryota
TRSP11968.t1	Tricho_longreads_scf.00067_272662	uroporphyrinogen decarboxylase-like	6.58703e-146	361	Lingula anatina	7574	Eukaryota
TRSP11969.t1	Tricho_longreads_scf.00067_272662	---NA---		70	No Blast Hit
TRSP11970.t1	Tricho_longreads_scf.00067_272662	pyruvate kinase, barrel domain containing protein	0	485	Acanthamoeba castellanii str. Neff	1257118	Eukaryota
TRSP11971.t1	Tricho_longreads_scf.00067_272662	Fbox domain containing protein	5.32658e-26	560	Acanthamoeba castellanii str. Neff	1257118	Eukaryota
TRSP11972.t1	Tricho_longreads_scf.00067_272662	---NA---		276	No Blast Hit
TRSP11973.t1	Tricho_longreads_scf.00067_272662	hypothetical protein	2.02739e-40	285	Algibacter aestuarii	912802	Bacteria
TRSP11974.t1	Tricho_longreads_scf.00067_272662	IMS-domain-containing protein	2.03123e-80	577	Rhizopus microsporus ATCC 52813	1340429	Eukaryota
TRSP11975.t1	Tricho_longreads_scf.00067_272662	tyrosine-protein phosphatase non-receptor type 9-like	4.70807e-11	294	Manduca sexta	7130	Eukaryota
TRSP11976.t1	Tricho_longreads_scf.00067_272662	SH2 domain-containing protein	3.45326e-57	732	Cavenderia fasciculata	261658	Eukaryota
TRSP11977.t1	Tricho_longreads_scf.00067_272662	actin binding protein	6.41051e-61	354	Heterostelium album PN500	670386	Eukaryota
TRSP11978.t1	Tricho_longreads_scf.00067_272662	high mobility group protein 1.2	2.62303e-22	315	Trichuris trichiura	36087	Eukaryota
TRSP11979.t1	Tricho_longreads_scf.00067_272662	hypothetical protein C9374_003491	5.19415e-66	357	Naegleria lovaniensis	51637	Eukaryota
TRSP11980.t1	Tricho_longreads_scf.00067_272662	putative superfamily II helicase	5.86816e-25	544	Planoprotostelium fungivorum	1890364	Eukaryota
TRSP11981.t1	Tricho_longreads_scf.00067_272662	hypothetical protein CANCADRAFT_132871	4.51087e-12	255	Tortispora caseinolytica NRRL Y-17796	767744	Eukaryota
TRSP11982.t1	Tricho_longreads_scf.00067_272662	Carbohydrate-binding module family 48 protein	4.69275e-13	230	Paramicrosporidium saccamoebae	1246581	Eukaryota
TRSP11983.t1	Tricho_longreads_scf.00067_272662	hypothetical protein	6.11222e-28	412	Rhodospirillales bacterium	2026786	Bacteria
TRSP11984.t1	Tricho_longreads_scf.00067_272662	CBF5	0	475	Symbiodinium sp. KB8	230985	Eukaryota
TRSP11985.t1	Tricho_longreads_scf.00067_272662	WD40 repeat-containing protein	2.27181e-31	1307	Heterostelium album PN500	670386	Eukaryota
TRSP11986.t1	Tricho_longreads_scf.00067_272662	toxin-antitoxin system YwqK family antitoxin	1.86407e-45	281	Luminiphilus syltensis NOR5-1B	565045	Bacteria
TRSP11987.t1	Tricho_longreads_scf.00067_272662	SET domain-containing protein-lysine N-methyltransferase	2.3845e-13	147	Leptospirales bacterium	2604146	Bacteria
TRSP11988.t1	Tricho_longreads_scf.00067_272662	hypothetical protein PPL_04706	1.4914e-15	308	Heterostelium album PN500	670386	Eukaryota
TRSP11989.t1	Tricho_longreads_scf.00067_272662	quinone oxidoreductase-like protein 1	1.61592e-36	328	Strongylocentrotus purpuratus	7668	Eukaryota
TRSP11990.t1	Tricho_longreads_scf.00067_272662	hypothetical protein BT93_L0414	9.93852e-35	312	Corymbia citriodora subsp. variegata	360336	Eukaryota
TRSP11991.t1	Tricho_longreads_scf.00067_272662	WD40 repeat domain-containing protein	1.91683e-78	313	Chloropicon primus	1764295	Eukaryota
TRSP11992.t1	Tricho_longreads_scf.00067_272662	hypothetical protein SAMD00019534_059450	3.59424e-129	984	Acytostelium subglobosum LB1	1410327	Eukaryota
TRSP11993.t1	Tricho_longreads_scf.00067_272662	ABC transporter-related protein	0	604	Heterostelium album PN500	670386	Eukaryota
TRSP11994.t1	Tricho_longreads_scf.00067_272662	hypothetical protein PybrP1_006599	2.75279e-55	266	Pythium brassicum	1485010	Eukaryota
TRSP11995.t1	Tricho_longreads_scf.00067_272662	---NA---		115	No Blast Hit
TRSP11996.t1	Tricho_longreads_scf.00067_272662	EF-hand domain-containing protein D1	4.00552e-59	184	Hyaena hyaena	95912	Eukaryota
TRSP11997.t1	Tricho_longreads_scf.00067_272662	hypothetical protein PROFUN_10908	3.44687e-52	318	Planoprotostelium fungivorum	1890364	Eukaryota
TRSP11998.t1	Tricho_longreads_scf.00067_272662	hypothetical protein PROFUN_10821	1.40035e-19	304	Planoprotostelium fungivorum	1890364	Eukaryota
TRSP11999.t1	Tricho_longreads_scf.00067_272662	unnamed protein product	6.60175e-100	289	Rotaria sordida	392033	Eukaryota
TRSP12000.t1	Tricho_longreads_scf.00067_272662	---NA---		280	No Blast Hit
TRSP12001.t1	Tricho_longreads_scf.00067_272662	hypothetical protein PROFUN_04153	4.03725e-161	833	Planoprotostelium fungivorum	1890364	Eukaryota
TRSP12002.t1	Tricho_longreads_scf.00067_272662	Olinked GlcNAc transferase-like protein	2.62894e-56	287	Acanthamoeba castellanii str. Neff	1257118	Eukaryota
TRSP12003.t1	Tricho_longreads_scf.00067_272662	hypothetical protein	1.79047e-30	156	Tupanvirus soda lake	2126985	Virus
TRSP12004.t1	Tricho_longreads_scf.00067_272662	glycolate dehydrogenase	0	998	Acanthamoeba castellanii str. Neff	1257118	Eukaryota
TRSP12005.t1	Tricho_longreads_scf.00067_272662	unnamed protein product	3.4458e-146	589	Didymodactylos carnosus	1234261	Eukaryota
TRSP12006.t1	Tricho_longreads_scf.00067_272662	---NA---		321	No Blast Hit
TRSP12007.t1	Tricho_longreads_scf.00067_272662	hypothetical protein	1.00258e-37	435	Desulfobulbus sp. AH-315-M07	2814557	Bacteria
TRSP12008.t1	Tricho_longreads_scf.00067_272662	hypothetical protein	5.70519e-66	400	Tupanvirus soda lake	2126985	Virus
TRSP12009.t1	Tricho_longreads_scf.00067_272662	---NA---		377	No Blast Hit
TRSP12010.t1	Tricho_longreads_scf.00067_272662	toxin-antitoxin system YwqK family antitoxin	3.36738e-59	428	Fibrobacter succinogenes	833	Bacteria
TRSP12011.t1	Tricho_longreads_scf.00067_272662	---NA---		574	No Blast Hit
TRSP12012.t1	Tricho_longreads_scf.00067_272662	---NA---		251	No Blast Hit
TRSP12013.t1	Tricho_longreads_scf.00067_272662	---NA---		185	No Blast Hit
TRSP12014.t1	Tricho_longreads_scf.00067_272662	---NA---		190	No Blast Hit
TRSP12015.t1	Tricho_longreads_scf.00067_272662	---NA---		120	No Blast Hit
TRSP12016.t1	Tricho_longreads_scf.00067_272662	hypothetical protein Mapa_009661	9.49735e-28	557	Marchantia paleacea	56867	Eukaryota
TRSP12017.t1	Tricho_longreads_scf.00067_272662	general transcription factor IIF subunit 2-like	3.38992e-23	246	Salmo trutta	8032	Eukaryota
TRSP12018.t1	Tricho_longreads_scf.00067_272662	---NA---		478	No Blast Hit
TRSP12019.t1	Tricho_longreads_scf.00067_272662	---NA---		572	No Blast Hit
TRSP12020.t1	Tricho_longreads_scf.00067_272662	---NA---		302	No Blast Hit
TRSP12021.t1	Tricho_longreads_scf.00067_272662	Ras guanine nucleotide exchange factor	2.2042e-81	724	Tieghemostelium lacteum	361077	Eukaryota
TRSP12022.t1	Tricho_longreads_scf.00067_272662	TIR domain-containing protein	1.62192e-22	716	Planctomycetaceae bacterium	2026779	Bacteria
TRSP12023.t1	Tricho_longreads_scf.00067_272662	histidyl-tRNA synthetase, putative	2.60439e-170	1269	Bodo saltans	75058	Eukaryota
TRSP12024.t1	Tricho_longreads_scf.00067_272662	---NA---		840	No Blast Hit
TRSP12025.t1	Tricho_longreads_scf.00067_272662	hypothetical protein BA869_10270	7.22378e-31	872	Desulfuromonadales bacterium C00003107	1869309	Bacteria
TRSP12026.t1	Tricho_longreads_scf.00067_272662	---NA---		573	No Blast Hit
TRSP12027.t1	Tricho_longreads_scf.00067_272662	toxin-antitoxin system YwqK family antitoxin	9.24161e-19	202	Helicobacter sp.	218	Bacteria
TRSP12028.t1	Tricho_longreads_scf.00067_272662	hypothetical protein CSA86_03445	3.59722e-24	214	Arcobacter sp.	1872629	Bacteria
TRSP12029.t1	Tricho_longreads_scf.00067_272662	SRT1	9.72741e-77	296	Symbiodinium natans	878477	Eukaryota
TRSP12030.t1	Tricho_longreads_scf.00067_272662	---NA---		380	No Blast Hit
TRSP12031.t1	Tricho_longreads_scf.00067_272662	hypothetical protein CYY_005917	0	1010	Polysphondylium violaceum	133409	Eukaryota
TRSP12032.t1	Tricho_longreads_scf.00067_272662	hypothetical protein KFL_003230070	2.5647e-27	794	Klebsormidium nitens	105231	Eukaryota
TRSP12033.t1	Tricho_longreads_scf.00067_272662	uncharacterized protein CD36_04690	0.000183633	136	Candida dubliniensis CD36	573826	Eukaryota
TRSP12034.t1	Tricho_longreads_scf.00067_272662	---NA---		192	No Blast Hit
TRSP12035.t1	Tricho_longreads_scf.00067_272662	membrane glycoprotein yil173w	8.00255e-96	829	Chrysochromulina tobinii	1460289	Eukaryota
TRSP12036.t1	Tricho_longreads_scf.00067_272662	ATP-dependent RNA helicase DDX55	1.5326e-136	624	Larimichthys crocea	215358	Eukaryota
TRSP12037.t1	Tricho_longreads_scf.00067_272662	unnamed protein product, partial	3.04402e-43	443	Rotaria sp. Silwood1	2762511	Eukaryota
TRSP12038.t1	Tricho_longreads_scf.00067_272662	---NA---		176	No Blast Hit
TRSP12039.t1	Tricho_longreads_scf.00067_272662	---NA---		197	No Blast Hit
TRSP12040.t1	Tricho_longreads_scf.00067_272662	---NA---		431	No Blast Hit
TRSP12041.t1	Tricho_longreads_scf.00067_272662	hypothetical protein PNEG_00499	2.43911e-12	200	Pneumocystis murina B123	1069680	Eukaryota
TRSP12042.t1	Tricho_longreads_scf.00067_272662	putative elav G	1.08534e-53	337	Streblomastix strix	222440	Eukaryota
TRSP12043.t1	Tricho_longreads_scf.00067_272662	hypothetical protein	8.12357e-13	762	Thermoguttaceae bacterium	2691551	Bacteria
TRSP12044.t1	Tricho_longreads_scf.00067_272662	hypothetical protein	9.03067e-20	264	Planctomyces sp.	37635	Bacteria
TRSP12045.t1	Tricho_longreads_scf.00067_272662	---NA---		500	No Blast Hit
TRSP12046.t1	Tricho_longreads_scf.00067_272662	WD40 repeat protein, COMPASS complex protein	2.81497e-107	437	Acanthamoeba castellanii str. Neff	1257118	Eukaryota
TRSP12047.t1	Tricho_longreads_scf.00067_272662	MORN repeat protein	4.08489e-13	201	Pacmanvirus A23	1932881	Virus
TRSP12048.t1	Tricho_longreads_scf.00067_272662	hypothetical protein	2.21134e-08	517	Actinobacteria bacterium	2900548
TRSP12049.t1	Tricho_longreads_scf.00067_272662	hypothetical protein	0.000462449	300	Clostridia bacterium	2044939	Bacteria
TRSP12050.t1	Tricho_longreads_scf.00067_272662	GNAT family N-acetyltransferase	2.03967e-22	155	Vibrio gazogenes	687	Bacteria
TRSP12051.t1	Tricho_longreads_scf.00067_272662	molybdopterin synthase catalytic subunit	2.54243e-51	152	Lingula anatina	7574	Eukaryota
TRSP12052.t1	Tricho_longreads_scf.00067_272662	hypothetical protein AXG93_2024s1100	1.94643e-13	194	Marchantia polymorpha subsp. ruderalis	1480154	Eukaryota
TRSP12053.t1	Tricho_longreads_scf.00067_272662	hypothetical protein	4.58136e-07	459	Clostridia bacterium	2044939	Bacteria
TRSP12054.t1	Tricho_longreads_scf.00067_272662	hypothetical protein	3.13002e-06	335	Actinobacteria bacterium	2900548
TRSP12055.t1	Tricho_longreads_scf.00067_272662	hypothetical protein	0.000167043	165	Oscillospiraceae bacterium	2485925	Bacteria
TRSP12056.t1	Tricho_longreads_scf.00067_272662	---NA---		565	No Blast Hit
TRSP12057.t1	Tricho_longreads_scf.00067_272662	3-hydroxybutyrate dehydrogenase	2.67115e-27	148	Ferruginivarius sediminum	2661937	Bacteria
TRSP12096.t1	Tricho_longreads_scf.00156_147190	---NA---		236	No Blast Hit
TRSP12097.t1	Tricho_longreads_scf.00156_147190	membrane-associated tyrosine- and threonine-specific cdc2-inhibitory kinase-like	1.01222e-56	424	Actinia tenebrosa	6105	Eukaryota
TRSP12098.t1	Tricho_longreads_scf.00156_147190	ribosomal protein S12	1.18144e-30	163	Vermamoeba vermiformis	5778	Eukaryota
TRSP12099.t1	Tricho_longreads_scf.00156_147190	---NA---		119	No Blast Hit
TRSP12100.t1	Tricho_longreads_scf.00156_147190	ATPase, AAA domain containing protein	5.1087e-160	711	Acanthamoeba castellanii str. Neff	1257118	Eukaryota
TRSP12101.t1	Tricho_longreads_scf.00156_147190	G-protein coupled receptor 157	2.19298e-09	253	Exaiptasia diaphana	2652724	Eukaryota
TRSP12102.t1	Tricho_longreads_scf.00156_147190	Hypothetical predicted protein	1.40238e-21	453	Cloeon dipterum	197152	Eukaryota
TRSP12103.t1	Tricho_longreads_scf.00156_147190	hypothetical protein	1.97541e-16	206	Chitinivibrionales bacterium	2663014	Bacteria
TRSP12104.t1	Tricho_longreads_scf.00156_147190	---NA---		168	No Blast Hit
TRSP12105.t1	Tricho_longreads_scf.00156_147190	---NA---		585	No Blast Hit
TRSP12106.t1	Tricho_longreads_scf.00156_147190	hypothetical protein THASP1DRAFT_17163, partial	5.71794e-26	90	Thamnocephalis sphaerospora	78915	Eukaryota
TRSP12107.t1	Tricho_longreads_scf.00156_147190	hypothetical protein Hyperionvirus6_11	2.67757e-33	613	Hyperionvirus sp.	2487770	Virus
TRSP12108.t1	Tricho_longreads_scf.00156_147190	Smg-4/UPF3 family-domain-containing protein	2.5714e-31	227	Dunaliella salina	3046	Eukaryota
TRSP12109.t1	Tricho_longreads_scf.00156_147190	ras related protein PiYpt1	1.33684e-71	214	Tribonema minus	303371	Eukaryota
TRSP1211.t1	Tricho_longreads_scf.00153_149379	F-box domain protein	5.17649e-19	159	Indivirus ILV1	1977633	Virus
TRSP12110.t1	Tricho_longreads_scf.00156_147190	---NA---		462	No Blast Hit
TRSP12111.t1	Tricho_longreads_scf.00156_147190	hypothetical protein RvY_16972	1.82495e-50	451	Ramazzottius varieornatus	947166	Eukaryota
TRSP12112.t1	Tricho_longreads_scf.00156_147190	hypothetical protein A2Z44_08960	1.60909e-112	480	Betaproteobacteria bacterium RBG_19FT_COMBO_58_11	1797480	Bacteria
TRSP12113.t1	Tricho_longreads_scf.00156_147190	---NA---		104	No Blast Hit
TRSP12114.t1	Tricho_longreads_scf.00156_147190	nitronate monooxygenase	6.61699e-57	339	Rhodospirillales bacterium URHD0017	1380357	Bacteria
TRSP12115.t1	Tricho_longreads_scf.00156_147190	hypothetical protein DL769_001902	1.15881e-18	749	Monosporascus sp. CRB-8-3	2211644	Eukaryota
TRSP12116.t1	Tricho_longreads_scf.00156_147190	hypothetical protein CYY_009240	0	597	Polysphondylium violaceum	133409	Eukaryota
TRSP12117.t1	Tricho_longreads_scf.00156_147190	hypothetical protein FO519_001385	5.12643e-28	305	Halicephalobus sp. NKZ332	2598192	Eukaryota
TRSP12118.t1	Tricho_longreads_scf.00156_147190	PREDICTED: uncharacterized protein LOC109580548	1.78931e-57	608	Amphimedon queenslandica	400682	Eukaryota
TRSP12119.t1	Tricho_longreads_scf.00156_147190	esterase/lipase/thioesterase domain-containing protein	4.27282e-47	308	Cavenderia fasciculata	261658	Eukaryota
TRSP1212.t1	Tricho_longreads_scf.00153_149379	hypothetical protein Harvfovirus8_11	2.83198e-56	352	Harvfovirus sp.	2487768	Virus
TRSP12120.t1	Tricho_longreads_scf.00156_147190	toxin-antitoxin system YwqK family antitoxin	4.28281e-09	76	Porphyromonas levii	28114	Bacteria
TRSP12121.t1	Tricho_longreads_scf.00156_147190	---NA---		39	No Blast Hit
TRSP12122.t1	Tricho_longreads_scf.00156_147190	alpha/beta fold hydrolase	2.86125e-14	518	Microcoleus sp. FACHB-831	2692827	Bacteria
TRSP12123.t1	Tricho_longreads_scf.00156_147190	iron-sulfur cluster carrier protein ApbC	1.75275e-100	301	bacterium	1869227	Bacteria
TRSP12124.t1	Tricho_longreads_scf.00156_147190	DNA methyltransferase dnmt5, putative	1.44736e-15	786	Acanthamoeba castellanii str. Neff	1257118	Eukaryota
TRSP12125.t1	Tricho_longreads_scf.00156_147190	---NA---		451	No Blast Hit
TRSP12126.t1	Tricho_longreads_scf.00156_147190	---NA---		240	No Blast Hit
TRSP12127.t1	Tricho_longreads_scf.00156_147190	BTB/POZ domain containing protein	3.0785e-59	460	Acanthamoeba castellanii str. Neff	1257118	Eukaryota
TRSP12128.t1	Tricho_longreads_scf.00156_147190	putative CDP-alcohol phosphatidyltransferase class-I family protein	1.62252e-86	355	Gracilariopsis chorda	448386	Eukaryota
TRSP12129.t1	Tricho_longreads_scf.00156_147190	---NA---		158	No Blast Hit
TRSP1213.t1	Tricho_longreads_scf.00153_149379	hypothetical protein CAPTEDRAFT_150487	3.73665e-49	213	Capitella teleta	283909	Eukaryota
TRSP12130.t1	Tricho_longreads_scf.00156_147190	---NA---		199	No Blast Hit
TRSP12131.t1	Tricho_longreads_scf.00156_147190	cacna2d1	9.23819e-102	1839	Nematostella vectensis	45351	Eukaryota
TRSP12132.t1	Tricho_longreads_scf.00156_147190	pseudouridine synthase	2.59897e-16	912	Bacteroides sp.	29523	Bacteria
TRSP12133.t1	Tricho_longreads_scf.00156_147190	hypothetical protein ACA1_278200	5.34258e-18	536	Acanthamoeba castellanii str. Neff	1257118	Eukaryota
TRSP12134.t1	Tricho_longreads_scf.00156_147190	hypothetical protein CYY_004966	2.01019e-26	563	Polysphondylium violaceum	133409	Eukaryota
TRSP12135.t1	Tricho_longreads_scf.00156_147190	hypothetical protein	1.01e-71	309	Candidatus Heimdallarchaeota archaeon	2026747	Archaea
TRSP12136.t1	Tricho_longreads_scf.00156_147190	nicotinamidase	3.12942e-40	379	Crassostrea gigas	29159	Eukaryota
TRSP12137.t1	Tricho_longreads_scf.00156_147190	glycosyl hydrolase family protein	1.21272e-07	805	Lachnospiraceae bacterium	1898203	Bacteria
TRSP12138.t1	Tricho_longreads_scf.00156_147190	---NA---		360	No Blast Hit
TRSP12139.t1	Tricho_longreads_scf.00156_147190	FMN-linked oxidoreductase	4.30694e-82	293	Hesseltinella vesiculosa	101127	Eukaryota
TRSP1214.t1	Tricho_longreads_scf.00153_149379	---NA---		207	No Blast Hit
TRSP12140.t1	Tricho_longreads_scf.00156_147190	vacuolar protein sortingassociated protein 45, putative	0	556	Acanthamoeba castellanii str. Neff	1257118	Eukaryota
TRSP12141.t1	Tricho_longreads_scf.00156_147190	hypothetical protein DLAC_08803	8.41056e-29	368	Tieghemostelium lacteum	361077	Eukaryota
TRSP12142.t1	Tricho_longreads_scf.00156_147190	hypothetical protein	4.62697e-06	145	Desulfobulbus sp. AH-315-M07	2814557	Bacteria
TRSP12143.t1	Tricho_longreads_scf.00156_147190	dihydrolipoyllysine-residue acetyltransferase component 1 of pyruvate dehydrogenase complex, mitochondrial isoform X2	1.01886e-77	342	Selaginella moellendorffii	88036	Eukaryota
TRSP12144.t1	Tricho_longreads_scf.00156_147190	---NA---		215	No Blast Hit
TRSP12145.t1	Tricho_longreads_scf.00156_147190	bifunctional polynucleotide phosphatase/kinase-like	1.15881e-116	415	Lytechinus variegatus	7654	Eukaryota
TRSP12146.t1	Tricho_longreads_scf.00156_147190	translation initiation factor eIF-2B subunit beta-like	2.79516e-117	358	Asterias rubens	7604	Eukaryota
TRSP12147.t1	Tricho_longreads_scf.00156_147190	Hypothetical protein EMIHUDRAFT_63012	3.09903e-51	117	Emiliania huxleyi CCMP1516	280463	Eukaryota
TRSP12148.t1	Tricho_longreads_scf.00156_147190	ER membrane protein complex subunit 1 isoform X2	2.39278e-53	898	Acanthochromis polyacanthus	80966	Eukaryota
TRSP12149.t1	Tricho_longreads_scf.00156_147190	ribosomal L27e protein family-domain-containing protein	2.64181e-39	134	Dimargaris cristalligena	215637	Eukaryota
TRSP1215.t1	Tricho_longreads_scf.00153_149379	hypothetical protein PROFUN_12589	5.12259e-26	942	Planoprotostelium fungivorum	1890364	Eukaryota
TRSP12150.t1	Tricho_longreads_scf.00156_147190	RNA polymerase II subunit A C-terminal domain phosphatase SSU72	4.15589e-50	178	Electrophorus electricus	8005	Eukaryota
TRSP12151.t1	Tricho_longreads_scf.00156_147190	NIPSNAP family protein	5.09188e-51	260	Acanthamoeba castellanii str. Neff	1257118	Eukaryota
TRSP12152.t1	Tricho_longreads_scf.00156_147190	phosducin-like protein	5.72951e-22	219	Sipha flava	143950	Eukaryota
TRSP12153.t1	Tricho_longreads_scf.00156_147190	putative calcium-binding protein CML25	2.21575e-06	227	Capsicum annuum	4072	Eukaryota
TRSP12154.t1	Tricho_longreads_scf.00156_147190	RapGAP/RanGAP domain containing protein	1.44724e-65	644	Acanthamoeba castellanii str. Neff	1257118	Eukaryota
TRSP12155.t1	Tricho_longreads_scf.00156_147190	RNA-binding protein	2.5535e-23	195	Leptolyngbya sp. DLM2.Bin27	2480213	Bacteria
TRSP12156.t1	Tricho_longreads_scf.00156_147190	hypothetical protein PROFUN_05036	1.72384e-94	342	Planoprotostelium fungivorum	1890364	Eukaryota
TRSP12157.t1	Tricho_longreads_scf.00156_147190	RING zinc finger-containing protein	6.84026e-27	763	Heterostelium album PN500	670386	Eukaryota
TRSP12158.t1	Tricho_longreads_scf.00156_147190	---NA---		401	No Blast Hit
TRSP12159.t1	Tricho_longreads_scf.00156_147190	ras-related protein Rab-32	1.28314e-66	213	Pipistrellus kuhlii	59472	Eukaryota
TRSP1216.t1	Tricho_longreads_scf.00153_149379	DNase I-like protein	2.24343e-06	1662	Pluteus cervinus	181527	Eukaryota
TRSP12160.t1	Tricho_longreads_scf.00156_147190	EF hand domain containing protein	4.68136e-69	366	Acanthamoeba castellanii str. Neff	1257118	Eukaryota
TRSP12161.t1	Tricho_longreads_scf.00156_147190	---NA---		182	No Blast Hit
TRSP12162.t1	Tricho_longreads_scf.00156_147190	AP-4 complex subunit mu	1.10666e-120	743	Hondaea fermentalgiana	2315210	Eukaryota
TRSP12163.t1	Tricho_longreads_scf.00156_147190	hypothetical protein	8.4424e-178	569	Chiloscyllium punctatum	137246	Eukaryota
TRSP12164.t1	Tricho_longreads_scf.00156_147190	---NA---		279	No Blast Hit
TRSP12165.t1	Tricho_longreads_scf.00298_45997	---NA---		82	No Blast Hit
TRSP12166.t1	Tricho_longreads_scf.00298_45997	serine/threonine kinase	6.08651e-101	471	Acanthamoeba castellanii str. Neff	1257118	Eukaryota
TRSP12167.t1	Tricho_longreads_scf.00298_45997	hypothetical protein	4.6437e-51	549	Desulfobulbus sp. AH-315-M07	2814557	Bacteria
TRSP12168.t1	Tricho_longreads_scf.00298_45997	RNA ligase, Rnl2 family	2.22398e-54	436	Tenacibaculum jejuense	584609	Bacteria
TRSP12169.t1	Tricho_longreads_scf.00298_45997	poly [ADP-ribose] polymerase 1	3.50053e-116	872	Octopus sinensis	2607531	Eukaryota
TRSP1217.t1	Tricho_longreads_scf.00153_149379	---NA---		160	No Blast Hit
TRSP12170.t1	Tricho_longreads_scf.00298_45997	hypothetical protein	7.37961e-26	271	Algibacter aestuarii	912802	Bacteria
TRSP12171.t1	Tricho_longreads_scf.00298_45997	PREDICTED: uncharacterized protein LOC102804514	0	747	Saccoglossus kowalevskii	10224	Eukaryota
TRSP12172.t1	Tricho_longreads_scf.00298_45997	Calcium/calmodulin-dependent protein kinase	1.42019e-70	739	Choanephora cucurbitarum	101091	Eukaryota
TRSP12173.t1	Tricho_longreads_scf.00298_45997	GATOR complex protein WDR59 isoform X2	8.90539e-71	867	Photinus pyralis	7054	Eukaryota
TRSP12174.t1	Tricho_longreads_scf.00298_45997	superoxide dismutase [Fe]	2.32894e-73	252	Oceanospirillales bacterium	1914300	Bacteria
TRSP12175.t1	Tricho_longreads_scf.00298_45997	hypothetical protein CYY_006096	1.50246e-83	267	Polysphondylium violaceum	133409	Eukaryota
TRSP12176.t1	Tricho_longreads_scf.00298_45997	predicted protein	7.36334e-69	942	Hordeum vulgare subsp. vulgare	112509	Eukaryota
TRSP12177.t1	Tricho_longreads_scf.00298_45997	hypothetical protein	9.39187e-10	163	Opitutae bacterium	2026771	Bacteria
TRSP12178.t1	Tricho_longreads_scf.00298_45997	hypothetical protein Hyperionvirus5_103	2.47351e-54	504	Hyperionvirus sp.	2487770	Virus
TRSP12179.t1	Tricho_longreads_scf.00298_45997	DNA replication licensing factor MCM6-like	9.16514e-13	151	Parasteatoda tepidariorum	114398	Eukaryota
TRSP1218.t1	Tricho_longreads_scf.00153_149379	hypothetical protein PROFUN_04725	8.61645e-134	1549	Planoprotostelium fungivorum	1890364	Eukaryota
TRSP1219.t1	Tricho_longreads_scf.00153_149379	UPF0171 family protein	2.66001e-90	514	Planoprotostelium fungivorum	1890364	Eukaryota
TRSP1220.t1	Tricho_longreads_scf.00153_149379	---NA---		102	No Blast Hit
TRSP1221.t1	Tricho_longreads_scf.00153_149379	hypothetical protein SAMD00019534_009160	3.33819e-29	392	Acytostelium subglobosum LB1	1410327	Eukaryota
TRSP12213.t1	Tricho_longreads_scf.00088_238416	hypothetical protein BB561_006071	2.20024e-08	156	Smittium simulii	133385	Eukaryota
TRSP12214.t1	Tricho_longreads_scf.00088_238416	hypothetical protein THASP1DRAFT_29866	1.46638e-18	546	Thamnocephalis sphaerospora	78915	Eukaryota
TRSP12215.t1	Tricho_longreads_scf.00088_238416	WD repeat-containing protein 43	7.77215e-19	524	Haplosporangium sp. Z 767	1897647	Eukaryota
TRSP12216.t1	Tricho_longreads_scf.00088_238416	DnaJ domain containing protein	1.19482e-64	408	Acanthamoeba castellanii str. Neff	1257118	Eukaryota
TRSP12217.t1	Tricho_longreads_scf.00088_238416	transmembrane protein	1.23224e-22	92	Cavenderia fasciculata	261658	Eukaryota
TRSP12218.t1	Tricho_longreads_scf.00088_238416	hypothetical protein INT44_006874	6.10558e-112	965	Umbelopsis vinacea	44442	Eukaryota
TRSP12219.t1	Tricho_longreads_scf.00088_238416	SCF ubiquitin ligase	2.37782e-89	163	uncultured eukaryote	100272	Eukaryota
TRSP1222.t1	Tricho_longreads_scf.00153_149379	poly(ADP-ribose) glycohydrolase isoform X2	5.95792e-32	616	Polistes dominula	743375	Eukaryota
TRSP12220.t1	Tricho_longreads_scf.00088_238416	uncharacterized protein LOC109719067 isoform X2	2.44315e-06	108	Ananas comosus var. bracteatus	296719	Eukaryota
TRSP12221.t1	Tricho_longreads_scf.00088_238416	hypothetical protein M758_11G113000	2.46682e-97	816	Ceratodon purpureus	3225	Eukaryota
TRSP12222.t1	Tricho_longreads_scf.00088_238416	poly(ADP-ribose) glycohydrolase-like isoform X2	5.76276e-24	604	Ceratina calcarata	156304	Eukaryota
TRSP12223.t1	Tricho_longreads_scf.00088_238416	hypothetical protein Ae201684_002573	4.1449e-63	538	Aphanomyces euteiches	100861	Eukaryota
TRSP12224.t1	Tricho_longreads_scf.00088_238416	unconventional myosin-Vb	5.64042e-111	2114	Erpetoichthys calabaricus	27687	Eukaryota
TRSP12225.t1	Tricho_longreads_scf.00088_238416	cysteinyl-tRNA synthetase	4.1906e-19	201	Heterostelium album PN500	670386	Eukaryota
TRSP12226.t1	Tricho_longreads_scf.00088_238416	unnamed protein product	3.54767e-42	162	Didymodactylos carnosus	1234261	Eukaryota
TRSP12227.t1	Tricho_longreads_scf.00088_238416	erythrocyte band 7 integral membrane -like	1.26755e-96	330	Brachionus plicatilis	10195	Eukaryota
TRSP12228.t1	Tricho_longreads_scf.00088_238416	coiled-coil domain-containing protein 181	6.24924e-13	251	Alligator mississippiensis	8496	Eukaryota
TRSP12229.t1	Tricho_longreads_scf.00088_238416	protein kinase	2.80855e-69	1131	Tribonema minus	303371	Eukaryota
TRSP1223.t1	Tricho_longreads_scf.00153_149379	phosphoglucomutase	0	569	Klebsormidium nitens	105231	Eukaryota
TRSP12230.t1	Tricho_longreads_scf.00088_238416	hypothetical protein DICPUDRAFT_31155	1.05982e-56	270	Dictyostelium purpureum	5786	Eukaryota
TRSP12231.t1	Tricho_longreads_scf.00088_238416	ribosomal protein L34e-domain-containing protein	5.74073e-27	132	Cantharellus anzutake	1750568	Eukaryota
TRSP12232.t1	Tricho_longreads_scf.00088_238416	PERQ amino acid-rich with GYF domain-containing protein 2 isoform X1	8.1575e-09	1030	Ictalurus punctatus	7998	Eukaryota
TRSP12233.t1	Tricho_longreads_scf.00088_238416	hypothetical protein As57867_013800	1.01728e-128	1441	Aphanomyces stellatus	120398	Eukaryota
TRSP12234.t1	Tricho_longreads_scf.00088_238416	hypothetical protein	5.50503e-10	110	Ruminococcus sp.	41978	Bacteria
TRSP12235.t1	Tricho_longreads_scf.00088_238416	palmitoylprotein thioesterase precursor, putative	2.40038e-65	490	Acanthamoeba castellanii str. Neff	1257118	Eukaryota
TRSP12236.t1	Tricho_longreads_scf.00088_238416	GTP 3',8-cyclase MoaA	5.10095e-145	331	Rhodothermaceae bacterium RA	1779382	Bacteria
TRSP12237.t1	Tricho_longreads_scf.00088_238416	---NA---		399	No Blast Hit
TRSP12238.t1	Tricho_longreads_scf.00088_238416	---NA---		829	No Blast Hit
TRSP12239.t1	Tricho_longreads_scf.00088_238416	hypothetical protein CYY_007405	4.65832e-35	234	Polysphondylium violaceum	133409	Eukaryota
TRSP1224.t1	Tricho_longreads_scf.00153_149379	1-pyrroline-5-carboxylate dehydrogenase	0	570	Acidobacteria bacterium	1978231	Bacteria
TRSP12240.t1	Tricho_longreads_scf.00088_238416	hypothetical protein	2.01684e-43	619	Desulfobulbus sp. AH-315-M07	2814557	Bacteria
TRSP12241.t1	Tricho_longreads_scf.00088_238416	hypothetical protein	2.10604e-42	326	Candidatus Helarchaeota archaeon	2719382	Archaea
TRSP12242.t1	Tricho_longreads_scf.00088_238416	transporter, major facilitator family protein	7.41979e-86	459	Acanthamoeba castellanii str. Neff	1257118	Eukaryota
TRSP12243.t1	Tricho_longreads_scf.00088_238416	LAG1 longevity assurance -like protein 2	9.12756e-34	291	Capsicum annuum	4072	Eukaryota
TRSP12244.t1	Tricho_longreads_scf.00088_238416	pyridoxal-phosphate dependent enzyme	7.50441e-51	319	Sulfurimonas autotrophica	202747	Bacteria
TRSP12245.t1	Tricho_longreads_scf.00088_238416	---NA---		95	No Blast Hit
TRSP12246.t1	Tricho_longreads_scf.00088_238416	replication factor C subunit 3	2.54284e-133	354	Planoprotostelium fungivorum	1890364	Eukaryota
TRSP12247.t1	Tricho_longreads_scf.00088_238416	U3 small nucleolar RNA-associated protein	8.35856e-22	731	Apophysomyces sp. BC1034	2184029	Eukaryota
TRSP12248.t1	Tricho_longreads_scf.00088_238416	hypothetical protein BOX15_Mlig008399g1	1.68291e-17	776	Macrostomum lignano	282301	Eukaryota
TRSP12249.t1	Tricho_longreads_scf.00088_238416	RNA polymerase III	0	1461	Cavenderia fasciculata	261658	Eukaryota
TRSP1225.t1	Tricho_longreads_scf.00153_149379	---NA---		361	No Blast Hit
TRSP12250.t1	Tricho_longreads_scf.00088_238416	ubiquitin C-terminal hydrolase L3	3.12968e-36	308	Planoprotostelium fungivorum	1890364	Eukaryota
TRSP12251.t1	Tricho_longreads_scf.00088_238416	hypothetical protein A2289_15280	9.96563e-09	210	Deltaproteobacteria bacterium RIFOXYB12_FULL_58_9	1797899	Bacteria
TRSP12252.t1	Tricho_longreads_scf.00088_238416	CBWD1 protein	6.64459e-91	394	Podargus strigoides	8905	Eukaryota
TRSP12253.t1	Tricho_longreads_scf.00088_238416	---NA---		216	No Blast Hit
TRSP12254.t1	Tricho_longreads_scf.00088_238416	DUF2135 domain-containing protein	2.76901e-82	1603	Deltaproteobacteria bacterium	2026735	Bacteria
TRSP12255.t1	Tricho_longreads_scf.00088_238416	cathepsin D	4.59896e-141	405	Tieghemostelium lacteum	361077	Eukaryota
TRSP12256.t1	Tricho_longreads_scf.00088_238416	endonuclease	8.82929e-76	453	Deltaproteobacteria bacterium	2026735	Bacteria
TRSP12257.t1	Tricho_longreads_scf.00088_238416	unnamed protein product, partial	1.62061e-10	101	Oppiella nova	334625	Eukaryota
TRSP12258.t1	Tricho_longreads_scf.00088_238416	D-arabinono-1,4-lactone oxidase	4.26908e-125	388	Galdieria sulphuraria	130081	Eukaryota
TRSP12259.t1	Tricho_longreads_scf.00088_238416	hypothetical protein DLAC_08803	4.64999e-35	809	Tieghemostelium lacteum	361077	Eukaryota
TRSP1226.t1	Tricho_longreads_scf.00153_149379	hypothetical protein PROFUN_11548	2.55188e-57	997	Planoprotostelium fungivorum	1890364	Eukaryota
TRSP12260.t1	Tricho_longreads_scf.00088_238416	TKL/TKL-ccin protein kinase	4.62269e-06	512	Coprinopsis cinerea	5346	Eukaryota
TRSP12261.t1	Tricho_longreads_scf.00088_238416	Oidioi.mRNA.OKI2018_I69.chr1.g3379.t1.cds	3.79848e-06	278	Oikopleura dioica	34765	Eukaryota
TRSP12262.t1	Tricho_longreads_scf.00088_238416	Splicing factor 3A subunit 3	1.3894e-108	462	Rhizophagus irregularis DAOM 181602=DAOM 197198	747089	Eukaryota
TRSP12263.t1	Tricho_longreads_scf.00088_238416	hypothetical protein	7.02769e-16	222	uncultured soil microorganism	1457551
TRSP12264.t1	Tricho_longreads_scf.00088_238416	prolyl 4hydroxylase, alpha subunit	3.67524e-28	219	Acanthamoeba castellanii str. Neff	1257118	Eukaryota
TRSP12265.t1	Tricho_longreads_scf.00088_238416	---NA---		95	No Blast Hit
TRSP12266.t1	Tricho_longreads_scf.00088_238416	---NA---		299	No Blast Hit
TRSP12267.t1	Tricho_longreads_scf.00088_238416	hypothetical protein LRAMOSA02921	1.15668e-38	590	Lichtheimia ramosa	688394	Eukaryota
TRSP12268.t1	Tricho_longreads_scf.00088_238416	mucin 91C	1.60558e-32	760	Planoprotostelium fungivorum	1890364	Eukaryota
TRSP12269.t1	Tricho_longreads_scf.00088_238416	Golgi SNAP receptor complex member 1	2.72969e-18	226	Lepeophtheirus salmonis	72036	Eukaryota
TRSP1227.t1	Tricho_longreads_scf.00153_149379	d9ec5138-8e79-4d95-b33b-4ef75663b084	9.70129e-08	666	Sclerotinia trifoliorum	28548	Eukaryota
TRSP12270.t1	Tricho_longreads_scf.00088_238416	hypothetical protein	6.09686e-16	724	Oscillospiraceae bacterium	2485925	Bacteria
TRSP12271.t1	Tricho_longreads_scf.00088_238416	hypothetical protein DICPUDRAFT_158685	7.04123e-13	235	Dictyostelium purpureum	5786	Eukaryota
TRSP12272.t1	Tricho_longreads_scf.00088_238416	---NA---		108	No Blast Hit
TRSP12273.t1	Tricho_longreads_scf.00088_238416	hypothetical protein	8.31735e-13	437	Candidatus Altiarchaeales archaeon	2250256	Archaea
TRSP12274.t1	Tricho_longreads_scf.00088_238416	hypothetical protein HST_G00057030	2.28959e-53	138	Hippoglossus stenolepis	195615	Eukaryota
TRSP12275.t1	Tricho_longreads_scf.00088_238416	---NA---		281	No Blast Hit
TRSP12276.t1	Tricho_longreads_scf.00088_238416	DgyrCDS12181	3.7977e-68	372	Dimorphilus gyrociliatus	2664684	Eukaryota
TRSP12277.t1	Tricho_longreads_scf.00088_238416	ATP-dependent RNA helicase DHX8	5.83109e-97	518	Macrolepiota fuliginosa MF-IS2	1400762	Eukaryota
TRSP12278.t1	Tricho_longreads_scf.00088_238416	---NA---		286	No Blast Hit
TRSP12279.t1	Tricho_longreads_scf.00088_238416	transmembrane protein 144-like isoform X3	1.25894e-102	380	Patiria miniata	46514	Eukaryota
TRSP1228.t1	Tricho_longreads_scf.00153_149379	EOG090X04G3	4.86569e-17	541	Moina brachiata	675436	Eukaryota
TRSP12280.t1	Tricho_longreads_scf.00088_238416	hypothetical protein BWX68_03009	8.05765e-15	447	Verrucomicrobia bacterium ADurb.Bin063	1852926	Bacteria
TRSP12281.t1	Tricho_longreads_scf.00088_238416	kinase-like protein	8.75427e-14	676	Gigaspora margarita	4874	Eukaryota
TRSP12282.t1	Tricho_longreads_scf.00088_238416	toxin-antitoxin system YwqK family antitoxin	6.58929e-24	198	Porphyromonas levii	28114	Bacteria
TRSP12283.t1	Tricho_longreads_scf.00088_238416	dimethylmenaquinone methyltransferase	1.83254e-112	282	Chloroflexi bacterium	2026724	Bacteria
TRSP12284.t1	Tricho_longreads_scf.00088_238416	hypothetical protein PROFUN_08344	9.92166e-113	640	Planoprotostelium fungivorum	1890364	Eukaryota
TRSP12285.t1	Tricho_longreads_scf.00088_238416	hypothetical protein CYY_004947	2.90474e-35	396	Polysphondylium violaceum	133409	Eukaryota
TRSP12286.t1	Tricho_longreads_scf.00088_238416	Poly(ADPribose) polymerase catalytic domain containing protein	2.84579e-45	788	Acanthamoeba castellanii str. Neff	1257118	Eukaryota
TRSP12287.t1	Tricho_longreads_scf.00088_238416	hypothetical protein Hyperionvirus6_11	3.43088e-42	865	Hyperionvirus sp.	2487770	Virus
TRSP12288.t1	Tricho_longreads_scf.00088_238416	toxin-antitoxin system YwqK family antitoxin	6.40036e-39	352	Fibrobacter sp. UWB12	1896203	Bacteria
TRSP12289.t1	Tricho_longreads_scf.00088_238416	alpha/beta fold hydrolase	3.4611e-16	497	Burkholderia sp. Ac-20379	2703900	Bacteria
TRSP1229.t1	Tricho_longreads_scf.00153_149379	winged helix DNA-binding domain-containing protein	1.02717e-46	371	Anaerolineae bacterium	2052143	Bacteria
TRSP12290.t1	Tricho_longreads_scf.00088_238416	---NA---		180	No Blast Hit
TRSP12291.t1	Tricho_longreads_scf.00088_238416	serine/threonine kinase	7.36924e-45	715	Cavenderia fasciculata	261658	Eukaryota
TRSP12292.t1	Tricho_longreads_scf.00088_238416	hypothetical protein CAPTEDRAFT_221879	3.25282e-15	511	Capitella teleta	283909	Eukaryota
TRSP12293.t1	Tricho_longreads_scf.00088_238416	AAA family ATPase	2.29619e-64	705	Actinomadura bangladeshensis	453573	Bacteria
TRSP12294.t1	Tricho_longreads_scf.00088_238416	WGR domain-containing protein	1.43645e-21	377	Kofleriaceae bacterium	2212474	Bacteria
TRSP12295.t1	Tricho_longreads_scf.00088_238416	---NA---		940	No Blast Hit
TRSP12296.t1	Tricho_longreads_scf.00088_238416	thymidine kinase, cytosolic-like	1.20581e-78	183	Amphimedon queenslandica	400682	Eukaryota
TRSP12297.t1	Tricho_longreads_scf.00088_238416	---NA---		132	No Blast Hit
TRSP12298.t1	Tricho_longreads_scf.00088_238416	hypothetical protein CYY_006644	7.26682e-43	709	Polysphondylium violaceum	133409	Eukaryota
TRSP12299.t1	Tricho_longreads_scf.00088_238416	hypothetical protein As57867_013884	5.08953e-12	269	Aphanomyces stellatus	120398	Eukaryota
TRSP1230.t1	Tricho_longreads_scf.00153_149379	hypothetical protein PROFUN_01866	6.11658e-10	592	Planoprotostelium fungivorum	1890364	Eukaryota
TRSP12300.t1	Tricho_longreads_scf.00088_238416	hypothetical protein ACA1_175440	6.53445e-07	284	Acanthamoeba castellanii str. Neff	1257118	Eukaryota
TRSP12301.t1	Tricho_longreads_scf.00088_238416	hypothetical protein BCV72DRAFT_77268	1.27811e-37	303	Rhizopus microsporus var. microsporus	86635	Eukaryota
TRSP12302.t1	Tricho_longreads_scf.00088_238416	FK506-binding protein 2-like	2.22782e-39	208	Dendronephthya gigantea	151771	Eukaryota
TRSP12303.t1	Tricho_longreads_scf.00088_238416	hypothetical protein	6.41526e-53	493	Desulfobulbus sp. AH-315-M07	2814557	Bacteria
TRSP12304.t1	Tricho_longreads_scf.00088_238416	WD domain, G-beta repeat-containing protein	4.3384e-38	464	Acanthamoeba castellanii str. Neff	1257118	Eukaryota
TRSP12305.t1	Tricho_longreads_scf.00088_238416	uncharacterized protein LOC110464043 isoform X2	2.31994e-28	213	Mizuhopecten yessoensis	6573	Eukaryota
TRSP12306.t1	Tricho_longreads_scf.00088_238416	aminoacyl tRNA synthase complex-interacting multifunctional protein 1a	4.1367e-54	434	Kryptolebias marmoratus	37003	Eukaryota
TRSP12307.t1	Tricho_longreads_scf.00088_238416	---NA---		238	No Blast Hit
TRSP1231.t1	Tricho_longreads_scf.00153_149379	guanine nucleotide-binding protein alpha-5 subunit, putative	4.93647e-139	352	Acanthamoeba castellanii str. Neff	1257118	Eukaryota
TRSP1232.t1	Tricho_longreads_scf.00153_149379	hypothetical protein	4.87546e-27	204	Candidatus Marinimicrobia bacterium	2026760	Bacteria
TRSP1233.t1	Tricho_longreads_scf.00153_149379	hypothetical protein DICPUDRAFT_153358	1.41669e-147	1064	Dictyostelium purpureum	5786	Eukaryota
TRSP1234.t1	Tricho_longreads_scf.00153_149379	SH2 domain-containing protein	9.03344e-103	1461	Planoprotostelium fungivorum	1890364	Eukaryota
TRSP1235.t1	Tricho_longreads_scf.00153_149379	DNA polymerase I	1.14158e-63	788	Sphaerochaeta sp. S2	2798868	Bacteria
TRSP12352.t1	Tricho_longreads_scf.00119_194326	---NA---		222	No Blast Hit
TRSP12353.t1	Tricho_longreads_scf.00119_194326	---NA---		449	No Blast Hit
TRSP12354.t1	Tricho_longreads_scf.00119_194326	---NA---		635	No Blast Hit
TRSP12355.t1	Tricho_longreads_scf.00119_194326	serine/threonine-protein kinase 4	6.19007e-42	206	Halichoerus grypus	9711	Eukaryota
TRSP12356.t1	Tricho_longreads_scf.00119_194326	---NA---		635	No Blast Hit
TRSP12357.t1	Tricho_longreads_scf.00119_194326	putative ataxia telangiectasia mutated	0	2921	Planoprotostelium fungivorum	1890364	Eukaryota
TRSP12358.t1	Tricho_longreads_scf.00119_194326	tetratricopeptide repeat protein	3.04556e-43	675	Persicimonas caeni	2292766	Bacteria
TRSP12359.t1	Tricho_longreads_scf.00119_194326	alpha-L-rhamnosidase	0	1043	Candidatus Solibacter sp.	2068625	Bacteria
TRSP1236.t1	Tricho_longreads_scf.00153_149379	---NA---		147	No Blast Hit
TRSP12360.t1	Tricho_longreads_scf.00119_194326	DBH-like monooxygenase protein 1 isoform X1	3.0721e-55	679	Exaiptasia diaphana	2652724	Eukaryota
TRSP12361.t1	Tricho_longreads_scf.00119_194326	tetratricopeptide repeat protein	4.31202e-16	762	Desulfallas sp. Bu1-1	2787620	Bacteria
TRSP12362.t1	Tricho_longreads_scf.00119_194326	---NA---		277	No Blast Hit
TRSP12363.t1	Tricho_longreads_scf.00119_194326	hypothetical protein PROFUN_01038	1.95703e-45	1053	Planoprotostelium fungivorum	1890364	Eukaryota
TRSP12364.t1	Tricho_longreads_scf.00119_194326	putative receptor protein kinase	3.9364e-46	1049	Planoprotostelium fungivorum	1890364	Eukaryota
TRSP12365.t1	Tricho_longreads_scf.00119_194326	putative receptor protein kinase	2.16356e-47	1042	Planoprotostelium fungivorum	1890364	Eukaryota
TRSP12366.t1	Tricho_longreads_scf.00119_194326	hypothetical protein SELMODRAFT_236265	5.95786e-106	904	Selaginella moellendorffii	88036	Eukaryota
TRSP12367.t1	Tricho_longreads_scf.00119_194326	chitinase-3-like protein 1 isoform X2	0.0001153	171	Penaeus vannamei	6689	Eukaryota
TRSP12368.t1	Tricho_longreads_scf.00119_194326	hypothetical protein AYI70_g1210	2.74855e-07	113	Smittium culicis	133412	Eukaryota
TRSP12369.t1	Tricho_longreads_scf.00119_194326	importin subunit alpha-like	6.70358e-06	452	Glossina fuscipes	7396	Eukaryota
TRSP1237.t1	Tricho_longreads_scf.00153_149379	amidase	7.59564e-74	475	Algoriphagus formosus	2007308	Bacteria
TRSP12370.t1	Tricho_longreads_scf.00119_194326	Rh-related protein	6.13752e-143	519	Branchiostoma floridae	7739	Eukaryota
TRSP12371.t1	Tricho_longreads_scf.00119_194326	FAD-binding oxidoreductase	4.12046e-34	678	Mangrovibacterium diazotrophicum	1261403	Bacteria
TRSP12372.t1	Tricho_longreads_scf.00119_194326	putative LRR receptor-like serine/threonine-protein kinase	2.45186e-45	1038	Planoprotostelium fungivorum	1890364	Eukaryota
TRSP12373.t1	Tricho_longreads_scf.00119_194326	hypothetical protein PROFUN_01038	6.21827e-46	1004	Planoprotostelium fungivorum	1890364	Eukaryota
TRSP12374.t1	Tricho_longreads_scf.00119_194326	FAD-dependent oxidoreductase	1.58389e-30	418	Firmicutes bacterium	1879010	Bacteria
TRSP12375.t1	Tricho_longreads_scf.00119_194326	phosphoinositide 3-kinase	3.6595e-106	989	Klosneuvirus KNV1	1977640	Virus
TRSP12376.t1	Tricho_longreads_scf.00119_194326	hypothetical protein PROFUN_02723	2.75084e-45	240	Planoprotostelium fungivorum	1890364	Eukaryota
TRSP12377.t1	Tricho_longreads_scf.00119_194326	hypothetical protein	1.3744e-55	318	Tupanvirus soda lake	2126985	Virus
TRSP12378.t1	Tricho_longreads_scf.00119_194326	beta-tubulin	5.56975e-21	469	Conidiobolus coronatus NRRL 28638	796925	Eukaryota
TRSP12379.t1	Tricho_longreads_scf.00119_194326	hypothetical protein PROFUN_05424	1.32585e-87	477	Planoprotostelium fungivorum	1890364	Eukaryota
TRSP1238.t1	Tricho_longreads_scf.00153_149379	hypothetical protein INT44_006036	1.4281e-57	266	Umbelopsis vinacea	44442	Eukaryota
TRSP12380.t1	Tricho_longreads_scf.00119_194326	hypothetical protein pdam_00022284	1.05235e-19	154	Pocillopora damicornis	46731	Eukaryota
TRSP12381.t1	Tricho_longreads_scf.00119_194326	hypothetical protein FDP41_012330	1.71629e-38	1516	Naegleria fowleri	5763	Eukaryota
TRSP12382.t1	Tricho_longreads_scf.00119_194326	U3 small nucleolar RNA-associated protein 18 homolog isoform X2	4.38662e-34	498	Formica exsecta	72781	Eukaryota
TRSP12383.t1	Tricho_longreads_scf.00119_194326	S-adenosyl-L-methionine-dependent methyltransferases superfamily protein	1.03757e-27	428	Artemisia annua	35608	Eukaryota
TRSP12384.t1	Tricho_longreads_scf.00119_194326	chaperonin 60	0	599	Dictyostelium discoideum AX4	352472	Eukaryota
TRSP12385.t1	Tricho_longreads_scf.00119_194326	serine/threonine kinase	9.43499e-90	675	Tieghemostelium lacteum	361077	Eukaryota
TRSP12386.t1	Tricho_longreads_scf.00119_194326	sodium potassium transporting ATPase alpha subunit	0	1001	Schistosoma mansoni	6183	Eukaryota
TRSP12387.t1	Tricho_longreads_scf.00119_194326	---NA---		339	No Blast Hit
TRSP12388.t1	Tricho_longreads_scf.00119_194326	hypothetical protein Harvfovirus5_25	6.37504e-36	369	Harvfovirus sp.	2487768	Virus
TRSP12389.t1	Tricho_longreads_scf.00119_194326	hypothetical protein INT45_002340	1.28208e-43	188	Mucor circinatus	2054153	Eukaryota
TRSP1239.t1	Tricho_longreads_scf.00153_149379	hypothetical protein	2.34727e-23	402	Chloroflexi bacterium	2026724	Bacteria
TRSP12390.t1	Tricho_longreads_scf.00119_194326	---NA---		638	No Blast Hit
TRSP12391.t1	Tricho_longreads_scf.00119_194326	oxysterol binding family protein, member 7	4.98219e-55	444	Dictyostelium discoideum AX4	352472	Eukaryota
TRSP12392.t1	Tricho_longreads_scf.00119_194326	hypothetical protein I3842_10G084800	1.12566e-05	466	Carya illinoinensis	32201	Eukaryota
TRSP12393.t1	Tricho_longreads_scf.00119_194326	ribosome maturation protein SBDS-like	1.33841e-66	282	Exaiptasia diaphana	2652724	Eukaryota
TRSP12394.t1	Tricho_longreads_scf.00119_194326	hypothetical protein JD969_18520	4.00174e-24	370	Planctomycetes bacterium	2026780	Bacteria
TRSP12395.t1	Tricho_longreads_scf.00119_194326	CLL4A clavata1-like receptor S/T protein kinase protein	2.01615e-42	1035	Planoprotostelium fungivorum	1890364	Eukaryota
TRSP12396.t1	Tricho_longreads_scf.00119_194326	hypothetical protein Hyperionvirus1_174	2.27275e-08	636	Hyperionvirus sp.	2487770	Virus
TRSP12397.t1	Tricho_longreads_scf.00119_194326	---NA---		98	No Blast Hit
TRSP12398.t1	Tricho_longreads_scf.00119_194326	---NA---		455	No Blast Hit
TRSP12399.t1	Tricho_longreads_scf.00119_194326	hypothetical protein DLAC_08803	6.52602e-34	572	Tieghemostelium lacteum	361077	Eukaryota
TRSP1240.t1	Tricho_longreads_scf.00153_149379	---NA---		127	No Blast Hit
TRSP12400.t1	Tricho_longreads_scf.00119_194326	---NA---		486	No Blast Hit
TRSP12401.t1	Tricho_longreads_scf.00119_194326	---NA---		276	No Blast Hit
TRSP12402.t1	Tricho_longreads_scf.00119_194326	zinc finger family protein	1.62843e-103	1357	Acanthamoeba castellanii str. Neff	1257118	Eukaryota
TRSP12403.t1	Tricho_longreads_scf.00119_194326	---NA---		126	No Blast Hit
TRSP12404.t1	Tricho_longreads_scf.00119_194326	2'-5'-oligoadenylate synthase 1A-like	6.88867e-15	420	Dendronephthya gigantea	151771	Eukaryota
TRSP12405.t1	Tricho_longreads_scf.00119_194326	alcohol dehydrogenase, zinccontaining, putative	1.2872e-134	361	Acanthamoeba castellanii str. Neff	1257118	Eukaryota
TRSP12406.t1	Tricho_longreads_scf.00119_194326	ankyrin repeat protein	5.40153e-88	1640	Salpingoeca rosetta	946362	Eukaryota
TRSP12407.t1	Tricho_longreads_scf.00119_194326	---NA---		484	No Blast Hit
TRSP12408.t1	Tricho_longreads_scf.00119_194326	uncharacterized protein LOC111345815	1.1664e-19	171	Stylophora pistillata	50429	Eukaryota
TRSP12409.t1	Tricho_longreads_scf.00119_194326	Hypothetical predicted protein	3.94721e-40	326	Mytilus galloprovincialis	29158	Eukaryota
TRSP1241.t1	Tricho_longreads_scf.00153_149379	type a von willebrand factor domain-containing protein	6.62337e-67	664	Stylonychia lemnae	5949	Eukaryota
TRSP12410.t1	Tricho_longreads_scf.00119_194326	---NA---		679	No Blast Hit
TRSP12411.t1	Tricho_longreads_scf.00119_194326	hypothetical protein EE612_008509, partial	5.97999e-35	202	Oryza sativa Japonica Group	39947	Eukaryota
TRSP12412.t1	Tricho_longreads_scf.00119_194326	ankyrin repeat protein	8.29971e-88	1482	Salpingoeca rosetta	946362	Eukaryota
TRSP12413.t1	Tricho_longreads_scf.00119_194326	---NA---		498	No Blast Hit
TRSP12414.t1	Tricho_longreads_scf.00119_194326	hypothetical protein PROFUN_01038	6.12637e-38	221	Planoprotostelium fungivorum	1890364	Eukaryota
TRSP1242.t1	Tricho_longreads_scf.00153_149379	protein farnesyltransferase/geranylgeranyltransferase type-1 subunit alpha	1.6454e-104	307	Strongylocentrotus purpuratus	7668	Eukaryota
TRSP12425.t1	Tricho_longreads_scf.00136_166881	Vitamin D 25-hydroxylase	1.92474e-19	180	Stegodyphus mimosarum	407821	Eukaryota
TRSP12426.t1	Tricho_longreads_scf.00136_166881	---NA---		160	No Blast Hit
TRSP12427.t1	Tricho_longreads_scf.00136_166881	---NA---		122	No Blast Hit
TRSP12428.t1	Tricho_longreads_scf.00136_166881	uncharacterized protein PTSG_04073	1.43976e-142	522	Salpingoeca rosetta	946362	Eukaryota
TRSP12429.t1	Tricho_longreads_scf.00136_166881	hypothetical protein BC938DRAFT_480287	1.05585e-09	513	Jimgerdemannia flammicorona	994334	Eukaryota
TRSP1243.t1	Tricho_longreads_scf.00153_149379	---NA---		287	No Blast Hit
TRSP12430.t1	Tricho_longreads_scf.00136_166881	calponin-1-like	6.73667e-23	123	Dendronephthya gigantea	151771	Eukaryota
TRSP12431.t1	Tricho_longreads_scf.00136_166881	PEP-CTERM sorting domain-containing protein	2.35817e-12	412	Nitrosospira multiformis	1231	Bacteria
TRSP12432.t1	Tricho_longreads_scf.00136_166881	---NA---		128	No Blast Hit
TRSP12433.t1	Tricho_longreads_scf.00136_166881	ABC transporter ATP-binding protein	3.4084e-157	627	Candidatus Woesearchaeota archaeon	2026803	Archaea
TRSP12434.t1	Tricho_longreads_scf.00136_166881	hypothetical protein DME22_03595	2.37792e-101	1316	Verrucomicrobia bacterium	2026799	Bacteria
TRSP12435.t1	Tricho_longreads_scf.00136_166881	---NA---		184	No Blast Hit
TRSP12436.t1	Tricho_longreads_scf.00136_166881	toxin-antitoxin system YwqK family antitoxin	2.4228e-23	222	Porphyromonas somerae	322095	Bacteria
TRSP12437.t1	Tricho_longreads_scf.00136_166881	hypothetical protein ACA1_113470	1.82503e-105	1333	Acanthamoeba castellanii str. Neff	1257118	Eukaryota
TRSP12438.t1	Tricho_longreads_scf.00136_166881	hypothetical protein	1.00434e-108	1076	Verrucomicrobia bacterium	2026799	Bacteria
TRSP12439.t1	Tricho_longreads_scf.00136_166881	SAM domain-containing protein	2.533e-83	613	Tieghemostelium lacteum	361077	Eukaryota
TRSP1244.t1	Tricho_longreads_scf.00153_149379	3-oxo-5-alpha-steroid 4-dehydrogenase 1 isoform X2	1.10407e-68	263	Ornithorhynchus anatinus	9258	Eukaryota
TRSP12440.t1	Tricho_longreads_scf.00136_166881	---NA---		320	No Blast Hit
TRSP12441.t1	Tricho_longreads_scf.00136_166881	---NA---		373	No Blast Hit
TRSP12442.t1	Tricho_longreads_scf.00136_166881	---NA---		231	No Blast Hit
TRSP12443.t1	Tricho_longreads_scf.00136_166881	---NA---		532	No Blast Hit
TRSP12444.t1	Tricho_longreads_scf.00136_166881	---NA---		194	No Blast Hit
TRSP12445.t1	Tricho_longreads_scf.00136_166881	---NA---		229	No Blast Hit
TRSP12446.t1	Tricho_longreads_scf.00136_166881	hypothetical protein	3.68248e-14	279	Desulfovibrio sp.	885	Bacteria
TRSP12447.t1	Tricho_longreads_scf.00136_166881	MORN repeat protein	1.1107e-26	183	Pacmanvirus A23	1932881	Virus
TRSP12448.t1	Tricho_longreads_scf.00136_166881	hypothetical protein	1.16494e-49	954	Chloroflexi bacterium	2026724	Bacteria
TRSP12449.t1	Tricho_longreads_scf.00136_166881	---NA---		100	No Blast Hit
TRSP1245.t1	Tricho_longreads_scf.00153_149379	unnamed protein product	0	469	Naegleria fowleri	5763	Eukaryota
TRSP12450.t1	Tricho_longreads_scf.00136_166881	hypothetical protein, variant	7.13942e-23	1086	Capsaspora owczarzaki ATCC 30864	595528	Eukaryota
TRSP12451.t1	Tricho_longreads_scf.00136_166881	hypothetical protein Hyperionvirus5_120	8.23796e-18	279	Hyperionvirus sp.	2487770	Virus
TRSP12452.t1	Tricho_longreads_scf.00136_166881	uncharacterized protein At4g26485-like	2.7923e-27	269	Malus baccata	106549	Eukaryota
TRSP12453.t1	Tricho_longreads_scf.00136_166881	hypothetical protein	2.15037e-17	286	Tupanvirus soda lake	2126985	Virus
TRSP12454.t1	Tricho_longreads_scf.00136_166881	hypothetical protein	1.97739e-06	220	Planctomycetes bacterium	2026780	Bacteria
TRSP12455.t1	Tricho_longreads_scf.00136_166881	toxin-antitoxin system YwqK family antitoxin	1.47524e-20	375	Fusobacterium pseudoperiodonticum	2663009	Bacteria
TRSP12456.t1	Tricho_longreads_scf.00136_166881	hypothetical protein A3759_13980	1.78143e-47	411	Thalassolituus sp. HI0120	1822263	Bacteria
TRSP12457.t1	Tricho_longreads_scf.00136_166881	leucine-rich repeat protein	3.76063e-26	235	Pithovirus LCPAC101	2506586	Virus
TRSP12458.t1	Tricho_longreads_scf.00136_166881	hypothetical protein Harvfovirus36_1, partial	1.56928e-34	257	Harvfovirus sp.	2487768	Virus
TRSP12459.t1	Tricho_longreads_scf.00136_166881	hypothetical protein Hyperionvirus6_11	5.8564e-28	359	Hyperionvirus sp.	2487770	Virus
TRSP1246.t1	Tricho_longreads_scf.00153_149379	hypothetical protein	9.53947e-69	908	Cyanobacteria bacterium UBA11372	2055768	Bacteria
TRSP12460.t1	Tricho_longreads_scf.00136_166881	chymotrypsin-like protease CTRL-1 isoform X2	1.39028e-42	289	Gadus morhua	8049	Eukaryota
TRSP12461.t1	Tricho_longreads_scf.00136_166881	glucose6-phosphate dehydrogenase, C-terminal domain containing protein	0	543	Acanthamoeba castellanii str. Neff	1257118	Eukaryota
TRSP12462.t1	Tricho_longreads_scf.00136_166881	C2-domain-containing protein	4.80383e-20	369	Basidiobolus meristosporus CBS 931.73	1314790	Eukaryota
TRSP12463.t1	Tricho_longreads_scf.00136_166881	toxin-antitoxin system YwqK family antitoxin	1.10346e-32	265	Halieaceae bacterium IMCC3088	2518989	Bacteria
TRSP12464.t1	Tricho_longreads_scf.00136_166881	F-box domain protein	6.1041e-46	273	Indivirus ILV1	1977633	Virus
TRSP12465.t1	Tricho_longreads_scf.00136_166881	---NA---		435	No Blast Hit
TRSP12466.t1	Tricho_longreads_scf.00136_166881	hypothetical protein C2G38_1960578	1.32308e-29	193	Gigaspora rosea	44941	Eukaryota
TRSP12467.t1	Tricho_longreads_scf.00136_166881	---NA---		221	No Blast Hit
TRSP12468.t1	Tricho_longreads_scf.00136_166881	---NA---		213	No Blast Hit
TRSP12469.t1	Tricho_longreads_scf.00136_166881	protein tolA, putative	8.00991e-68	349	Acanthamoeba castellanii str. Neff	1257118	Eukaryota
TRSP1247.t1	Tricho_longreads_scf.00153_149379	leucine--tRNA ligase	0	896	Limnothrix sp. FACHB-881	2692819	Bacteria
TRSP12470.t1	Tricho_longreads_scf.00136_166881	probable beta-D-xylosidase 5	3.09994e-160	907	Amphimedon queenslandica	400682	Eukaryota
TRSP12471.t1	Tricho_longreads_scf.00136_166881	---NA---		350	No Blast Hit
TRSP12472.t1	Tricho_longreads_scf.00136_166881	hypothetical protein	3.62182e-21	574	Halieaceae bacterium	2026743	Bacteria
TRSP12473.t1	Tricho_longreads_scf.00136_166881	hypothetical protein	5.43388e-21	477	Halieaceae bacterium	2026743	Bacteria
TRSP12474.t1	Tricho_longreads_scf.00136_166881	---NA---		457	No Blast Hit
TRSP12475.t1	Tricho_longreads_scf.00136_166881	toxin-antitoxin system YwqK family antitoxin	4.36608e-42	317	Algibacter aestuarii	912802	Bacteria
TRSP12476.t1	Tricho_longreads_scf.00136_166881	leucine-rich repeat protein	1.49219e-55	322	Pithovirus LCPAC101	2506586	Virus
TRSP12477.t1	Tricho_longreads_scf.00136_166881	lactose-binding lectin l-2-like	3.25686e-08	329	Poecilia mexicana	48701	Eukaryota
TRSP12478.t1	Tricho_longreads_scf.00136_166881	toxin-antitoxin system YwqK family antitoxin	3.51164e-43	285	Fibrobacter sp. UWB4	1964356	Bacteria
TRSP12479.t1	Tricho_longreads_scf.00136_166881	toxin-antitoxin system YwqK family antitoxin	1.71152e-51	455	Fibrobacter sp.	35828	Bacteria
TRSP1248.t1	Tricho_longreads_scf.00153_149379	CDGSH iron-sulfur domain-containing protein	2.93861e-22	120	Fusobacteriaceae bacterium	2053555	Bacteria
TRSP12480.t1	Tricho_longreads_scf.00136_166881	hypothetical protein FNF31_07575	0	530	Cafeteria roenbergensis	33653	Eukaryota
TRSP12481.t1	Tricho_longreads_scf.00136_166881	hypothetical protein DFQ27_007825	2.1513e-06	435	Actinomortierella ambigua	1343610	Eukaryota
TRSP12482.t1	Tricho_longreads_scf.00136_166881	hypothetical protein CVU61_15550	8.97549e-21	258	Deltaproteobacteria bacterium HGW-Deltaproteobacteria-19	2013746	Bacteria
TRSP12483.t1	Tricho_longreads_scf.00136_166881	F-box domain protein	3.52175e-31	240	Indivirus ILV1	1977633	Virus
TRSP12484.t1	Tricho_longreads_scf.00136_166881	uncharacterized protein	1.38034e-69	243	Blastocystis hominis	12968	Eukaryota
TRSP12485.t1	Tricho_longreads_scf.00136_166881	hypothetical protein CYY_005422	2.26091e-75	260	Polysphondylium violaceum	133409	Eukaryota
TRSP12486.t1	Tricho_longreads_scf.00136_166881	hypothetical protein M758_1G140900	7.84293e-21	445	Ceratodon purpureus	3225	Eukaryota
TRSP12487.t1	Tricho_longreads_scf.00136_166881	hypothetical protein PPL_05152	1.02942e-12	956	Heterostelium album PN500	670386	Eukaryota
TRSP12488.t1	Tricho_longreads_scf.00136_166881	---NA---		305	No Blast Hit
TRSP12489.t1	Tricho_longreads_scf.00136_166881	hypothetical protein Hyperionvirus1_152	1.40272e-21	187	Hyperionvirus sp.	2487770	Virus
TRSP1249.t1	Tricho_longreads_scf.00153_149379	adenylosuccinate lyase	0	453	Pontibacter pudoricolor	2694930	Bacteria
TRSP12490.t1	Tricho_longreads_scf.00124_185874	hypothetical protein EIP86_000752	1.30185e-10	95	Pleurotus ostreatoroseus	2048520	Eukaryota
TRSP12491.t1	Tricho_longreads_scf.00124_185874	hypothetical protein	3.22009e-98	549	Alphaproteobacteria bacterium	1913988	Bacteria
TRSP12492.t1	Tricho_longreads_scf.00124_185874	---NA---		569	No Blast Hit
TRSP12493.t1	Tricho_longreads_scf.00124_185874	toxin-antitoxin system YwqK family antitoxin	3.63285e-05	212	Chlamydiae bacterium	2081524	Bacteria
TRSP12494.t1	Tricho_longreads_scf.00124_185874	hypothetical protein	6.65316e-47	405	Algibacter aestuarii	912802	Bacteria
[truncated: 25,370 more rows]

## Sheet: Eukaryota
Sequence name	Scaffold_id	Sequence desc.	Sequence length	E-Value	Species	TaxID	Kingdom
TRSP28497.t1	Tricho_longreads_scf.00044_330626	hypothetical protein B5S29_g2609 [	292	8.45997e-05	[Candida] boidinii]	5477	Eukaryota
TRSP29494.t1	Tricho_longreads_scf.00038_359085	DNA polymerase epsilon catalytic subunit A-like	2219	0	Abrus precatorius	3816	Eukaryota
TRSP6954.t1	Tricho_longreads_scf.00785_22326	meiotic recombination protein SPO11-2 isoform X2	250	9.27072e-13	Abrus precatorius	3816	Eukaryota
TRSP42430.t1	Tricho_longreads_scf.00014_642678	hypothetical protein FQR65_LT08660	101	1.78805e-34	Abscondita terminalis	2069292	Eukaryota
TRSP41457.t1	Tricho_longreads_scf.00112_202110	hypothetical protein FQR65_LT10832	165	3.77297e-17	Abscondita terminalis	2069292	Eukaryota
TRSP3964.t1	Tricho_longreads_scf.00110_206213	hypothetical protein	310	0	Absidia glauca	4829	Eukaryota
TRSP19140.t1	Tricho_longreads_scf.00125_182297	hypothetical protein	357	9.32146e-60	Absidia glauca	4829	Eukaryota
TRSP28142.t1	Tricho_longreads_scf.00089_236149	hypothetical protein	389	4.69924e-53	Absidia glauca	4829	Eukaryota
TRSP26279.t1	Tricho_longreads_scf.00047_322559	hypothetical protein	222	4.34593e-23	Absidia glauca	4829	Eukaryota
TRSP30858.t1	Tricho_longreads_scf.00113_200828	hypothetical protein	273	7.97349e-05	Absidia glauca	4829	Eukaryota
TRSP31876.t1	Tricho_longreads_scf.00190_114270	ADP,ATP carrier protein	306	6.1106e-139	Absidia repens	90262	Eukaryota
TRSP31889.t1	Tricho_longreads_scf.00190_114270	ADP,ATP carrier protein	306	6.1106e-139	Absidia repens	90262	Eukaryota
TRSP31742.t1	Tricho_longreads_scf.00100_218392	vacuolar protein sorting 55	130	2.03156e-32	Absidia repens	90262	Eukaryota
TRSP11036.t1	Tricho_longreads_scf.00059_288384	hypothetical protein BCR42DRAFT_412008	699	1.83894e-171	Absidia repens	90262	Eukaryota
TRSP23069.t1	Tricho_longreads_scf.00061_286003	clathrin, heavy chain	699	3.24415e-65	Absidia repens	90262	Eukaryota
TRSP31090.t1	Tricho_longreads_scf.00108_208067	pyridoxal-dependent decarboxylase	429	1.42535e-98	Absidia repens	90262	Eukaryota
TRSP23389.t1	Tricho_longreads_scf.00111_202777	rab-GTPase-TBC domain-domain-containing protein	306	1.38484e-39	Absidia repens	90262	Eukaryota
TRSP42483.t1	Tricho_longreads_scf.00014_642678	PPPDE putative peptidase domain-domain-containing protein	277	2.64077e-16	Absidia repens	90262	Eukaryota
TRSP30573.t1	Tricho_longreads_scf.00102_215809	DHHC palmitoyltransferase-domain-containing protein	291	4.3897e-49	Absidia repens	90262	Eukaryota
TRSP18362.t1	Tricho_longreads_scf.00029_440001	WD40-repeat-containing domain protein	445	2.10066e-28	Absidia repens	90262	Eukaryota
TRSP24401.t1	Tricho_longreads_scf.00137_165529	nucleoporin complex subunit 54-domain-containing protein	339	3.48973e-28	Absidia repens	90262	Eukaryota
TRSP32461.t1	Tricho_longreads_scf.00404_33704	actin-1, putative	375	0	Acanthamoeba castellanii	5755	Eukaryota
TRSP24262.t1	Tricho_longreads_scf.00384_35220	actin-1, putative	375	0	Acanthamoeba castellanii	5755	Eukaryota
TRSP2412.t1	Tricho_longreads_scf.00300_45407	actin-1, putative	375	0	Acanthamoeba castellanii	5755	Eukaryota
TRSP10741.t1	Tricho_longreads_scf.00078_262981	PfpI family peptidase	172	6.5427e-71	Acanthamoeba castellanii	5755	Eukaryota
TRSP27325.t1	Tricho_longreads_scf.00052_310865	protein kinase C17	497	0	Acanthamoeba castellanii	5755	Eukaryota
TRSP25934.t1	Tricho_longreads_scf.00017_602044	RecName: Full=Myosin heavy chain IB; AltName: Full=Myosin heavy chain IL	1064	0	Acanthamoeba castellanii	5755	Eukaryota
TRSP15897.t1	Tricho_longreads_scf.00013_658143	protein kinase C4	362	1.42238e-121	Acanthamoeba castellanii	5755	Eukaryota
TRSP28770.t1	Tricho_longreads_scf.00133_170447	ubiquitin-like protein Ublp94.4	500	1.18977e-168	Acanthamoeba castellanii	5755	Eukaryota
TRSP1252.t1	Tricho_longreads_scf.00153_149379	cysteine protease 3	328	1.22119e-122	Acanthamoeba castellanii	5755	Eukaryota
TRSP23522.t1	Tricho_longreads_scf.00006_856200	cysteine protease 3	338	1.74446e-125	Acanthamoeba castellanii	5755	Eukaryota
TRSP12913.t1	Tricho_longreads_scf.00055_302167	cysteine protease 3	340	4.8171e-116	Acanthamoeba castellanii	5755	Eukaryota
TRSP3651.t1	Tricho_longreads_scf.00007_838757	mitochondrial transcription factor B-like protein	320	6.43715e-90	Acanthamoeba castellanii	5755	Eukaryota
TRSP44083.t1	Tricho_longreads_scf.00009_791302	cysteine proteinase precursor	322	8.34426e-121	Acanthamoeba castellanii	5755	Eukaryota
TRSP5578.t1	Tricho_longreads_scf.00475_29710	protein kinase C1	355	6.99283e-110	Acanthamoeba castellanii	5755	Eukaryota
TRSP10084.t1	Tricho_longreads_scf.00042_341914	protein kinase C1	351	3.15256e-110	Acanthamoeba castellanii	5755	Eukaryota
TRSP17620.t1	Tricho_longreads_scf.00186_116445	Thg1-like protein 1	273	2.06238e-76	Acanthamoeba castellanii	5755	Eukaryota
TRSP26311.t1	Tricho_longreads_scf.00047_322559	Tom70	882	0	Acanthamoeba castellanii	5755	Eukaryota
TRSP28856.t1	Tricho_longreads_scf.00140_163105	cAMP phosphodiesterase	629	5.73716e-137	Acanthamoeba castellanii	5755	Eukaryota
TRSP25369.t1	Tricho_longreads_scf.00166_140178	autophagy protein 5	279	5.13382e-66	Acanthamoeba castellanii	5755	Eukaryota
TRSP32473.t1	Tricho_longreads_scf.00422_32413	adenylate cyclase B	1398	2.90686e-78	Acanthamoeba castellanii	5755	Eukaryota
TRSP24247.t1	Tricho_longreads_scf.00250_64232	adenylate cyclase B	1398	2.90686e-78	Acanthamoeba castellanii	5755	Eukaryota
TRSP4693.t1	Tricho_longreads_scf.00083_257487	adenylate cyclase B	555	1.36254e-83	Acanthamoeba castellanii	5755	Eukaryota
TRSP28771.t1	Tricho_longreads_scf.00133_170447	ubiquitin-like protein Ublp94.4	290	1.14785e-29	Acanthamoeba castellanii	5755	Eukaryota
TRSP13872.t1	Tricho_longreads_scf.00093_229579	actin-1, putative	374	0	Acanthamoeba castellanii str. Neff	1257118	Eukaryota
TRSP4215.t1	Tricho_longreads_scf.00246_66155	actin-1, putative	115	6.31627e-69	Acanthamoeba castellanii str. Neff	1257118	Eukaryota
TRSP8699.t1	Tricho_longreads_scf.00319_42678	actin-1, putative	105	1.9818e-68	Acanthamoeba castellanii str. Neff	1257118	Eukaryota
TRSP30238.t1	Tricho_longreads_scf.00082_257650	core histone h2a/h2b/h3/h4 superfamily protein	120	6.34475e-55	Acanthamoeba castellanii str. Neff	1257118	Eukaryota
TRSP8967.t1	Tricho_longreads_scf.00050_315752	core histone h2a/h2b/h3/h4 superfamily protein	120	6.34475e-55	Acanthamoeba castellanii str. Neff	1257118	Eukaryota
TRSP30237.t1	Tricho_longreads_scf.00082_257650	core histone h2a/h2b/h3/h4 superfamily protein	122	3.72848e-50	Acanthamoeba castellanii str. Neff	1257118	Eukaryota
TRSP21845.t1	Tricho_longreads_scf.00109_207519	protein phosphatase 6, catalytic subunit isoform a, putative	309	0	Acanthamoeba castellanii str. Neff	1257118	Eukaryota
TRSP38847.t1	Tricho_longreads_scf.00808_22010	actinrelated protein 2, putative	391	0	Acanthamoeba castellanii str. Neff	1257118	Eukaryota
TRSP15095.t1	Tricho_longreads_scf.00146_158180	actinrelated protein 2, putative	391	0	Acanthamoeba castellanii str. Neff	1257118	Eukaryota
TRSP10947.t1	Tricho_longreads_scf.00099_221761	Rho family, small GTP binding protein Rac3, putative	193	4.89407e-106	Acanthamoeba castellanii str. Neff	1257118	Eukaryota
TRSP5293.t1	Tricho_longreads_scf.00084_256585	small Gprotein	188	7.68507e-101	Acanthamoeba castellanii str. Neff	1257118	Eukaryota
TRSP25629.t1	Tricho_longreads_scf.00091_235394	elongation factor SIII p15 subunit, putative	105	6.64875e-50	Acanthamoeba castellanii str. Neff	1257118	Eukaryota
TRSP31197.t1	Tricho_longreads_scf.00592_26331	protein phosphatase 6, catalytic subunit isoform a, putative	354	1.90281e-09	Acanthamoeba castellanii str. Neff	1257118	Eukaryota
TRSP19684.t1	Tricho_longreads_scf.00072_268357	Hypothetical protein ACA1_178210	244	3.18003e-132	Acanthamoeba castellanii str. Neff	1257118	Eukaryota
TRSP16815.t1	Tricho_longreads_scf.00012_738869	Peptidylprolyl cis-trans isomerase-like 1, putative	159	9.38925e-84	Acanthamoeba castellanii str. Neff	1257118	Eukaryota
TRSP10807.t1	Tricho_longreads_scf.00128_177280	transport protein Sec61 alpha subunit, putative	477	0	Acanthamoeba castellanii str. Neff	1257118	Eukaryota
TRSP37671.t1	Tricho_longreads_scf.00129_176063	Rho family, small GTP binding protein Rac3, putative	193	4.09377e-101	Acanthamoeba castellanii str. Neff	1257118	Eukaryota
TRSP24624.t1	Tricho_longreads_scf.00008_824997	signal peptidase I, putative	183	5.72124e-89	Acanthamoeba castellanii str. Neff	1257118	Eukaryota
TRSP27172.t1	Tricho_longreads_scf.00081_260942	Vtype ATPase, C subunit	165	5.42919e-70	Acanthamoeba castellanii str. Neff	1257118	Eukaryota
TRSP25856.t1	Tricho_longreads_scf.00017_602044	ras-related protein Rab-2A, putative	206	4.09272e-110	Acanthamoeba castellanii str. Neff	1257118	Eukaryota
TRSP44096.t1	Tricho_longreads_scf.00009_791302	ATP:L-methionine S-Adenosyltransferase	387	0	Acanthamoeba castellanii str. Neff	1257118	Eukaryota
TRSP33541.t1	Tricho_longreads_scf.00020_510754	casein kinase ii subunit beta, putative	566	2.26129e-97	Acanthamoeba castellanii str. Neff	1257118	Eukaryota
TRSP6093.t1	Tricho_longreads_scf.00058_297874	Actinrelated protein 3, putative	417	0	Acanthamoeba castellanii str. Neff	1257118	Eukaryota
TRSP25628.t1	Tricho_longreads_scf.00091_235394	ribosomal protein S9, putative	144	9.61453e-63	Acanthamoeba castellanii str. Neff	1257118	Eukaryota
TRSP17805.t1	Tricho_longreads_scf.00046_325925	hypothetical protein ACA1_148460	223	8.13589e-99	Acanthamoeba castellanii str. Neff	1257118	Eukaryota
TRSP25120.t1	Tricho_longreads_scf.00196_110900	Rasrelated C3 botulinum toxin substrate 1 precursor, putative	201	2.13671e-94	Acanthamoeba castellanii str. Neff	1257118	Eukaryota
TRSP35637.t1	Tricho_longreads_scf.00182_119534	ATPase, AAA domain containing protein	288	7.91262e-134	Acanthamoeba castellanii str. Neff	1257118	Eukaryota
TRSP32364.t1	Tricho_longreads_scf.00262_56927	Ubiquitinlike modifier-activating enzyme 1, putative	213	3.0503e-80	Acanthamoeba castellanii str. Neff	1257118	Eukaryota
TRSP16877.t1	Tricho_longreads_scf.00002_1182365	integral membrane protein 1 isoform 5, putative	707	0	Acanthamoeba castellanii str. Neff	1257118	Eukaryota
TRSP12621.t1	Tricho_longreads_scf.00123_190498	Sar1family small GTPase	192	7.49304e-94	Acanthamoeba castellanii str. Neff	1257118	Eukaryota
TRSP15517.t1	Tricho_longreads_scf.00147_156433	ccr4associated factor, putative	269	4.37389e-133	Acanthamoeba castellanii str. Neff	1257118	Eukaryota
TRSP36706.t1	Tricho_longreads_scf.00021_507094	meiotic recombinase Dmc1, putative	340	3.19951e-159	Acanthamoeba castellanii str. Neff	1257118	Eukaryota
TRSP40018.t1	Tricho_longreads_scf.02214_11410	protein kinase	397	1.10014e-87	Acanthamoeba castellanii str. Neff	1257118	Eukaryota
TRSP16143.t1	Tricho_longreads_scf.00003_1004824	ABC transporter domain protein	301	9.75339e-134	Acanthamoeba castellanii str. Neff	1257118	Eukaryota
TRSP15776.t1	Tricho_longreads_scf.00013_658143	hypothetical protein ACA1_183020	267	1.91727e-34	Acanthamoeba castellanii str. Neff	1257118	Eukaryota
TRSP27194.t1	Tricho_longreads_scf.00081_260942	Inosine5'-monophosphate dehydrogenase	272	2.18927e-127	Acanthamoeba castellanii str. Neff	1257118	Eukaryota
TRSP32945.t1	Tricho_longreads_scf.00025_477026	DNAdirected RNA polymerase, beta subunit	1195	0	Acanthamoeba castellanii str. Neff	1257118	Eukaryota
TRSP17310.t1	Tricho_longreads_scf.00002_1182365	Isobutyryl-CoA dehydrogenase, putative	248	1.11218e-89	Acanthamoeba castellanii str. Neff	1257118	Eukaryota
TRSP1153.t1	Tricho_longreads_scf.00086_252263	Factin-capping protein subunit beta, putative	271	1.17732e-135	Acanthamoeba castellanii str. Neff	1257118	Eukaryota
TRSP12997.t1	Tricho_longreads_scf.00055_302167	formate-tetrahydrofolate ligase	642	0	Acanthamoeba castellanii str. Neff	1257118	Eukaryota
TRSP33744.t1	Tricho_longreads_scf.00221_85164	hypothetical protein ACA1_364340	98	3.67852e-41	Acanthamoeba castellanii str. Neff	1257118	Eukaryota
TRSP35599.t1	Tricho_longreads_scf.00182_119534	zinc finger domain containing protein	267	4.7034e-37	Acanthamoeba castellanii str. Neff	1257118	Eukaryota
TRSP1846.t1	Tricho_longreads_scf.00039_358812	transketolase, putative	859	0	Acanthamoeba castellanii str. Neff	1257118	Eukaryota
TRSP9214.t1	Tricho_longreads_scf.00041_348916	purinergic receptor, putative	68	1.42018e-16	Acanthamoeba castellanii str. Neff	1257118	Eukaryota
TRSP31165.t1	Tricho_longreads_scf.00178_128213	3oxoacid CoA transferase 1 isoform 3, putative	503	0	Acanthamoeba castellanii str. Neff	1257118	Eukaryota
TRSP33524.t1	Tricho_longreads_scf.00020_510754	mitochondrial phosphate transporter, putative	605	5.04235e-145	Acanthamoeba castellanii str. Neff	1257118	Eukaryota
TRSP18454.t1	Tricho_longreads_scf.00029_440001	Ras family protein	213	9.26236e-103	Acanthamoeba castellanii str. Neff	1257118	Eukaryota
TRSP16335.t1	Tricho_longreads_scf.00003_1004824	signal peptide binding domain containing protein	476	0	Acanthamoeba castellanii str. Neff	1257118	Eukaryota
TRSP25535.t1	Tricho_longreads_scf.00126_181615	GTP cyclohydrolase II, putative	257	4.96219e-65	Acanthamoeba castellanii str. Neff	1257118	Eukaryota
TRSP27140.t1	Tricho_longreads_scf.00081_260942	MAP/microtubule affinityregulating kinase	930	7.98636e-138	Acanthamoeba castellanii str. Neff	1257118	Eukaryota
TRSP39779.t1	Tricho_longreads_scf.00209_95378	cystathionine gammasynthase	387	2.4582e-174	Acanthamoeba castellanii str. Neff	1257118	Eukaryota
TRSP26462.t1	Tricho_longreads_scf.00077_264455	shortchain dehydrogenase/reductase SDR, putative	307	5.57823e-137	Acanthamoeba castellanii str. Neff	1257118	Eukaryota
TRSP18378.t1	Tricho_longreads_scf.00029_440001	serine hydroxymethyltransferase	451	0	Acanthamoeba castellanii str. Neff	1257118	Eukaryota
TRSP10201.t1	Tricho_longreads_scf.00042_341914	homogentisate 1,2dioxygenase	439	0	Acanthamoeba castellanii str. Neff	1257118	Eukaryota
TRSP16653.t1	Tricho_longreads_scf.00012_738869	ABC exporter, ATPbinding protein	662	0	Acanthamoeba castellanii str. Neff	1257118	Eukaryota
TRSP7044.t1	Tricho_longreads_scf.00051_312876	coatomer subunit gamma, putative	477	0	Acanthamoeba castellanii str. Neff	1257118	Eukaryota
TRSP23766.t1	Tricho_longreads_scf.00006_856200	geranylgeranyl diphosphate synthase 1, putative	304	1.74314e-121	Acanthamoeba castellanii str. Neff	1257118	Eukaryota
TRSP27182.t1	Tricho_longreads_scf.00081_260942	Inosine5'-monophosphate dehydrogenase	560	0	Acanthamoeba castellanii str. Neff	1257118	Eukaryota
TRSP6955.t1	Tricho_longreads_scf.00179_128070	opioid growth factor receptor (ogfr) region protein, putative	140	5.08893e-52	Acanthamoeba castellanii str. Neff	1257118	Eukaryota
TRSP28859.t1	Tricho_longreads_scf.00140_163105	clathrin coat assembly protein, putative	170	1.36418e-67	Acanthamoeba castellanii str. Neff	1257118	Eukaryota
TRSP30103.t1	Tricho_longreads_scf.00151_152232	glycerol3-phosphate dehydrogenase	346	8.62325e-136	Acanthamoeba castellanii str. Neff	1257118	Eukaryota
TRSP21541.t1	Tricho_longreads_scf.00169_138509	ABC transporter ATPase/permease	625	0	Acanthamoeba castellanii str. Neff	1257118	Eukaryota
TRSP22323.t1	Tricho_longreads_scf.00005_925709	20S proteasome alpha subunit F, putative	257	3.23574e-106	Acanthamoeba castellanii str. Neff	1257118	Eukaryota
TRSP12773.t1	Tricho_longreads_scf.00116_197489	hypothetical protein ACA1_368290	302	8.88257e-33	Acanthamoeba castellanii str. Neff	1257118	Eukaryota
TRSP31665.t1	Tricho_longreads_scf.00100_218392	ATPase, AAA domain containing protein	1060	0	Acanthamoeba castellanii str. Neff	1257118	Eukaryota
TRSP35062.t1	Tricho_longreads_scf.00092_230423	UDPglucose pyrophosphorylase 2 isoform, putative	502	0	Acanthamoeba castellanii str. Neff	1257118	Eukaryota
TRSP17080.t1	Tricho_longreads_scf.00002_1182365	hydroxymethylglutarylCoA reductase (NADPH), putative	588	4.87051e-168	Acanthamoeba castellanii str. Neff	1257118	Eukaryota
TRSP34304.t1	Tricho_longreads_scf.00019_512507	nucleoside diphosphate kinase 1, putative	312	4.68657e-79	Acanthamoeba castellanii str. Neff	1257118	Eukaryota
TRSP33151.t1	Tricho_longreads_scf.00951_20015	vacuolar protein sortingassociated protein 26, putative	356	7.09652e-145	Acanthamoeba castellanii str. Neff	1257118	Eukaryota
TRSP12762.t1	Tricho_longreads_scf.00116_197489	RNA recognition motifdomain containing protein	472	1.26225e-44	Acanthamoeba castellanii str. Neff	1257118	Eukaryota
TRSP10426.t1	Tricho_longreads_scf.00138_164325	ER lumen proteinretaining receptor-like protein	247	8.14472e-87	Acanthamoeba castellanii str. Neff	1257118	Eukaryota
TRSP21808.t1	Tricho_longreads_scf.00109_207519	zinc finger, C3HC4 type (RING finger) domain containing protein	447	2.58436e-76	Acanthamoeba castellanii str. Neff	1257118	Eukaryota
TRSP22411.t1	Tricho_longreads_scf.00104_213812	receptor mediated endocytosis family member (rme1), putative	505	0	Acanthamoeba castellanii str. Neff	1257118	Eukaryota
TRSP31668.t1	Tricho_longreads_scf.00100_218392	K+ channel tetramerisation subfamily protein	415	6.12273e-24	Acanthamoeba castellanii str. Neff	1257118	Eukaryota
TRSP18736.t1	Tricho_longreads_scf.00015_607500	hypothetical protein ACA1_161750	114	2.35229e-37	Acanthamoeba castellanii str. Neff	1257118	Eukaryota
TRSP14868.t1	Tricho_longreads_scf.00027_457298	proteasome subunit protein, putative	252	2.56437e-84	Acanthamoeba castellanii str. Neff	1257118	Eukaryota
TRSP44537.t1	Tricho_longreads_scf.00011_772879	checkpoint protein hus1, putative	588	1.30477e-91	Acanthamoeba castellanii str. Neff	1257118	Eukaryota
TRSP13187.t1	Tricho_longreads_scf.00114_200515	actin-1, putative	366	2.98998e-162	Acanthamoeba castellanii str. Neff	1257118	Eukaryota
TRSP43405.t1	Tricho_longreads_scf.00286_48781	hypothetical protein ACA1_187480	139	3.80085e-52	Acanthamoeba castellanii str. Neff	1257118	Eukaryota
TRSP20596.t1	Tricho_longreads_scf.00232_75092	hypothetical protein ACA1_187480	139	3.80085e-52	Acanthamoeba castellanii str. Neff	1257118	Eukaryota
TRSP30938.t1	Tricho_longreads_scf.00490_29138	hypothetical protein ACA1_161750	114	5.41116e-37	Acanthamoeba castellanii str. Neff	1257118	Eukaryota
TRSP33718.t1	Tricho_longreads_scf.00202_103780	archease family protein	144	1.78708e-41	Acanthamoeba castellanii str. Neff	1257118	Eukaryota
TRSP25670.t1	Tricho_longreads_scf.00091_235394	hypothetical protein ACA1_204440	1001	0	Acanthamoeba castellanii str. Neff	1257118	Eukaryota
TRSP12405.t1	Tricho_longreads_scf.00119_194326	alcohol dehydrogenase, zinccontaining, putative	361	1.2872e-134	Acanthamoeba castellanii str. Neff	1257118	Eukaryota
TRSP44766.t1	Tricho_longreads_scf.00174_133189	hypothetical protein ACA1_370300	441	8.45273e-176	Acanthamoeba castellanii str. Neff	1257118	Eukaryota
TRSP17120.t1	Tricho_longreads_scf.00002_1182365	e3 ubiquitinprotein ligase rbra, putative	516	0	Acanthamoeba castellanii str. Neff	1257118	Eukaryota
TRSP23131.t1	Tricho_longreads_scf.00197_110896	nicotinate phosphoribosyltransferase, (NAPRTase) subfamily protein	516	0	Acanthamoeba castellanii str. Neff	1257118	Eukaryota
TRSP21250.t1	Tricho_longreads_scf.00028_441143	golgi family protein, putative	384	4.6398e-170	Acanthamoeba castellanii str. Neff	1257118	Eukaryota
TRSP4974.t1	Tricho_longreads_scf.00062_284551	Ankyrin repeatcontaining protein	133	6.28432e-40	Acanthamoeba castellanii str. Neff	1257118	Eukaryota
TRSP7069.t1	Tricho_longreads_scf.00051_312876	Synapsin, ATP binding domain containing protein	385	1.37477e-126	Acanthamoeba castellanii str. Neff	1257118	Eukaryota
TRSP28137.t1	Tricho_longreads_scf.00089_236149	aconitate hydratase, mitochondrial, putative	777	0	Acanthamoeba castellanii str. Neff	1257118	Eukaryota
TRSP31670.t1	Tricho_longreads_scf.00100_218392	biogenesis of lysosome related family protein	158	1.03285e-32	Acanthamoeba castellanii str. Neff	1257118	Eukaryota
TRSP17256.t1	Tricho_longreads_scf.00002_1182365	Aga27A, putative	406	3.39005e-176	Acanthamoeba castellanii str. Neff	1257118	Eukaryota
TRSP19982.t1	Tricho_longreads_scf.00231_75146	DNA repair protein (mre11), putative	563	3.41506e-152	Acanthamoeba castellanii str. Neff	1257118	Eukaryota
TRSP3764.t1	Tricho_longreads_scf.00007_838757	DNA repair protein (mre11), putative	563	3.41506e-152	Acanthamoeba castellanii str. Neff	1257118	Eukaryota
TRSP10281.t1	Tricho_longreads_scf.00033_419090	DEAD/DEAH box helicase domain containing protein	811	0	Acanthamoeba castellanii str. Neff	1257118	Eukaryota
TRSP9970.t1	Tricho_longreads_scf.00004_931448	DEAD box RNA helicase, putative	1914	0	Acanthamoeba castellanii str. Neff	1257118	Eukaryota
TRSP45258.t1	Tricho_longreads_scf.00053_308123	COMM domain containing protein 6, putative	76	1.03355e-21	Acanthamoeba castellanii str. Neff	1257118	Eukaryota
TRSP1231.t1	Tricho_longreads_scf.00153_149379	guanine nucleotide-binding protein alpha-5 subunit, putative	352	4.93647e-139	Acanthamoeba castellanii str. Neff	1257118	Eukaryota
TRSP18082.t1	Tricho_longreads_scf.00032_419434	zinc finger, C3HC4 type (RING finger) domain containing protein	97	1.4509e-36	Acanthamoeba castellanii str. Neff	1257118	Eukaryota
TRSP4960.t1	Tricho_longreads_scf.00062_284551	aspartate aminotransferase	966	3.67147e-155	Acanthamoeba castellanii str. Neff	1257118	Eukaryota
TRSP33558.t1	Tricho_longreads_scf.00020_510754	eukaryotic dna topoisomerase, putative	488	9.96532e-69	Acanthamoeba castellanii str. Neff	1257118	Eukaryota
TRSP34296.t1	Tricho_longreads_scf.00019_512507	Synapsin, ATP binding domain containing protein	342	2.23878e-142	Acanthamoeba castellanii str. Neff	1257118	Eukaryota
TRSP30557.t1	Tricho_longreads_scf.00102_215809	carbamoylphosphate synthase, large subunit	1457	0	Acanthamoeba castellanii str. Neff	1257118	Eukaryota
TRSP20454.t1	Tricho_longreads_scf.00173_133484	Synapsin, ATP binding domain containing protein	339	2.70788e-113	Acanthamoeba castellanii str. Neff	1257118	Eukaryota
TRSP36748.t1	Tricho_longreads_scf.00021_507094	DC2like protein	148	4.80689e-49	Acanthamoeba castellanii str. Neff	1257118	Eukaryota
TRSP6957.t1	Tricho_longreads_scf.00179_128070	opioid growth factor receptor (ogfr) region protein, putative	324	1.32566e-87	Acanthamoeba castellanii str. Neff	1257118	Eukaryota
TRSP11310.t1	Tricho_longreads_scf.00030_432512	lysosomal ProX carboxypeptidase	475	0	Acanthamoeba castellanii str. Neff	1257118	Eukaryota
TRSP32922.t1	Tricho_longreads_scf.00025_477026	helicase conserved Cterminal domain containing protein	1002	0	Acanthamoeba castellanii str. Neff	1257118	Eukaryota
TRSP39290.t1	Tricho_longreads_scf.00018_567815	haloacid dehalogenaselike hydrolase domain containing protein	223	2.52476e-65	Acanthamoeba castellanii str. Neff	1257118	Eukaryota
TRSP29590.t1	Tricho_longreads_scf.00038_359085	Factin-capping protein subunit alpha-2, putative	283	4.7677e-111	Acanthamoeba castellanii str. Neff	1257118	Eukaryota
TRSP32889.t1	Tricho_longreads_scf.00025_477026	PCI domain containing protein	441	1.07145e-158	Acanthamoeba castellanii str. Neff	1257118	Eukaryota
TRSP12940.t1	Tricho_longreads_scf.00055_302167	isochorismatase hydrolase	184	1.11853e-62	Acanthamoeba castellanii str. Neff	1257118	Eukaryota
TRSP20262.t1	Tricho_longreads_scf.00260_58246	acylCoA thioester hydrolase	446	2.2426e-139	Acanthamoeba castellanii str. Neff	1257118	Eukaryota
TRSP13808.t1	Tricho_longreads_scf.00284_49788	Rasrelated GTPase	201	8.10866e-58	Acanthamoeba castellanii str. Neff	1257118	Eukaryota
TRSP8218.t1	Tricho_longreads_scf.00252_63162	tryptophan synthase alpha chain, putative	667	0	Acanthamoeba castellanii str. Neff	1257118	Eukaryota
TRSP44370.t1	Tricho_longreads_scf.00011_772879	proteasome (prosome, macropain) 26S subunit, nonATPase, 6, putative	382	6.02134e-149	Acanthamoeba castellanii str. Neff	1257118	Eukaryota
TRSP23050.t1	Tricho_longreads_scf.00061_286003	actin bundling protein	220	1.32388e-71	Acanthamoeba castellanii str. Neff	1257118	Eukaryota
TRSP20191.t1	Tricho_longreads_scf.00200_104721	TNF receptor-associated protein 1, putative	798	0	Acanthamoeba castellanii str. Neff	1257118	Eukaryota
TRSP12286.t1	Tricho_longreads_scf.00088_238416	Poly(ADPribose) polymerase catalytic domain containing protein	788	2.84579e-45	Acanthamoeba castellanii str. Neff	1257118	Eukaryota
TRSP14927.t1	Tricho_longreads_scf.00027_457298	K+ channel tetramerisation subfamily protein	269	4.00051e-20	Acanthamoeba castellanii str. Neff	1257118	Eukaryota
TRSP44480.t1	Tricho_longreads_scf.00011_772879	hypothetical protein ACA1_034470	254	1.3543e-86	Acanthamoeba castellanii str. Neff	1257118	Eukaryota
TRSP16152.t1	Tricho_longreads_scf.00003_1004824	guanine nucleotide-binding protein alpha-5 subunit, putative	351	1.07618e-139	Acanthamoeba castellanii str. Neff	1257118	Eukaryota
TRSP24095.t1	Tricho_longreads_scf.00022_503607	ABC transporter, ATPbinding domain containing protein	675	0	Acanthamoeba castellanii str. Neff	1257118	Eukaryota
TRSP13816.t1	Tricho_longreads_scf.00284_49788	hypothetical protein ACA1_198300	307	4.73008e-112	Acanthamoeba castellanii str. Neff	1257118	Eukaryota
TRSP10902.t1	Tricho_longreads_scf.00099_221761	serine-tRNA ligase domain containing protein	478	0	Acanthamoeba castellanii str. Neff	1257118	Eukaryota
TRSP18476.t1	Tricho_longreads_scf.00029_440001	vacuolar sorting protein, putative	491	0	Acanthamoeba castellanii str. Neff	1257118	Eukaryota
TRSP17167.t1	Tricho_longreads_scf.00002_1182365	mRNA decay factorlike protein	1124	0	Acanthamoeba castellanii str. Neff	1257118	Eukaryota
TRSP5455.t1	Tricho_longreads_scf.00189_114652	guanine nucleotide-binding protein alpha-5 subunit, putative	341	1.28245e-137	Acanthamoeba castellanii str. Neff	1257118	Eukaryota
TRSP22082.t1	Tricho_longreads_scf.00005_925709	NAD dependent epimerase/dehydratase family protein	318	6.73015e-122	Acanthamoeba castellanii str. Neff	1257118	Eukaryota
TRSP44041.t1	Tricho_longreads_scf.00009_791302	COP9 signalosome complex subunit 4, putative	395	2.8579e-131	Acanthamoeba castellanii str. Neff	1257118	Eukaryota
TRSP12461.t1	Tricho_longreads_scf.00136_166881	glucose6-phosphate dehydrogenase, C-terminal domain containing protein	543	0	Acanthamoeba castellanii str. Neff	1257118	Eukaryota
TRSP23639.t1	Tricho_longreads_scf.00006_856200	phytochelatin synthase, putative	385	1.80702e-76	Acanthamoeba castellanii str. Neff	1257118	Eukaryota
TRSP25793.t1	Tricho_longreads_scf.00017_602044	Endomembrane protein 70 subfamily	591	0	Acanthamoeba castellanii str. Neff	1257118	Eukaryota
TRSP17760.t1	Tricho_longreads_scf.00046_325925	CCAATbox binding transcription factor subunit HAP3-related, putative	111	6.24023e-26	Acanthamoeba castellanii str. Neff	1257118	Eukaryota
TRSP3615.t1	Tricho_longreads_scf.00007_838757	hypothetical protein ACA1_307830	215	6.01087e-35	Acanthamoeba castellanii str. Neff	1257118	Eukaryota
TRSP13981.t1	Tricho_longreads_scf.00001_1255013	serine/threonineprotein phosphatase PP2A, putative	148	1.94684e-20	Acanthamoeba castellanii str. Neff	1257118	Eukaryota
TRSP22516.t1	Tricho_longreads_scf.00187_116187	serine/threonine kinase	440	5.47386e-157	Acanthamoeba castellanii str. Neff	1257118	Eukaryota
TRSP10545.t1	Tricho_longreads_scf.00149_154273	GTP cyclohydrolase II, putative	256	8.42148e-56	Acanthamoeba castellanii str. Neff	1257118	Eukaryota
TRSP23846.t1	Tricho_longreads_scf.00105_211905	hypothetical protein ACA1_174000	67	4.08686e-18	Acanthamoeba castellanii str. Neff	1257118	Eukaryota
TRSP32109.t1	Tricho_longreads_scf.00266_55260	NAD-dependent malic enzyme, putative	588	0	Acanthamoeba castellanii str. Neff	1257118	Eukaryota
TRSP10829.t1	Tricho_longreads_scf.00128_177280	proteasome 26S subunit, nonATPase, 1, putative	979	0	Acanthamoeba castellanii str. Neff	1257118	Eukaryota
TRSP21100.t1	Tricho_longreads_scf.00152_149972	cellulase (glycosyl hydrolase family 5) subfamily protein	392	3.88699e-151	Acanthamoeba castellanii str. Neff	1257118	Eukaryota
TRSP3447.t1	Tricho_longreads_scf.00007_838757	clathrin heavy chain, putative	1707	0	Acanthamoeba castellanii str. Neff	1257118	Eukaryota
TRSP15926.t1	Tricho_longreads_scf.00013_658143	vacuolar protein sortingassociated protein 28, putative	244	1.28391e-58	Acanthamoeba castellanii str. Neff	1257118	Eukaryota
TRSP12140.t1	Tricho_longreads_scf.00156_147190	vacuolar protein sortingassociated protein 45, putative	556	0	Acanthamoeba castellanii str. Neff	1257118	Eukaryota
TRSP10371.t1	Tricho_longreads_scf.00033_419090	eukaryotic dna topoisomerase, putative	653	0	Acanthamoeba castellanii str. Neff	1257118	Eukaryota
TRSP23681.t1	Tricho_longreads_scf.00006_856200	guanine nucleotide-binding protein alpha-5 subunit, putative	355	3.94576e-128	Acanthamoeba castellanii str. Neff	1257118	Eukaryota
TRSP23662.t1	Tricho_longreads_scf.00006_856200	hypothetical protein ACA1_145250	257	2.41857e-100	Acanthamoeba castellanii str. Neff	1257118	Eukaryota
TRSP11970.t1	Tricho_longreads_scf.00067_272662	pyruvate kinase, barrel domain containing protein	485	0	Acanthamoeba castellanii str. Neff	1257118	Eukaryota
TRSP19947.t1	Tricho_longreads_scf.00192_113109	serine/threonine kinase	804	1.69868e-101	Acanthamoeba castellanii str. Neff	1257118	Eukaryota
TRSP32860.t1	Tricho_longreads_scf.00025_477026	prolyl 4hydroxylase, alpha subunit	232	4.03545e-80	Acanthamoeba castellanii str. Neff	1257118	Eukaryota
TRSP5275.t1	Tricho_longreads_scf.00084_256585	guanine nucleotide-binding protein alpha-5 subunit, putative	364	1.92662e-132	Acanthamoeba castellanii str. Neff	1257118	Eukaryota
TRSP15994.t1	Tricho_longreads_scf.00013_658143	hypothetical protein ACA1_184760	211	5.64755e-21	Acanthamoeba castellanii str. Neff	1257118	Eukaryota
TRSP26316.t1	Tricho_longreads_scf.00047_322559	hypothetical protein ACA1_208300	488	1.94541e-117	Acanthamoeba castellanii str. Neff	1257118	Eukaryota
TRSP35737.t1	Tricho_longreads_scf.00139_163662	Rho family, small GTP binding protein Rac3, putative	214	4.30331e-45	Acanthamoeba castellanii str. Neff	1257118	Eukaryota
TRSP23786.t1	Tricho_longreads_scf.00006_856200	hypothetical protein ACA1_024000	130	1.37384e-09	Acanthamoeba castellanii str. Neff	1257118	Eukaryota
TRSP21717.t1	Tricho_longreads_scf.00049_317669	hypothetical protein ACA1_398940	163	2.0473e-33	Acanthamoeba castellanii str. Neff	1257118	Eukaryota
TRSP12771.t1	Tricho_longreads_scf.00116_197489	guanine nucleotide-binding protein alpha-5 subunit, putative	357	1.16584e-113	Acanthamoeba castellanii str. Neff	1257118	Eukaryota
TRSP9369.t1	Tricho_longreads_scf.00177_128716	Ras family protein	175	1.35765e-50	Acanthamoeba castellanii str. Neff	1257118	Eukaryota
TRSP16110.t1	Tricho_longreads_scf.00003_1004824	guanine nucleotide-binding protein alpha-5 subunit, putative	353	8.6157e-136	Acanthamoeba castellanii str. Neff	1257118	Eukaryota
TRSP13004.t1	Tricho_longreads_scf.00055_302167	glycosyl hydrolase, family 31 protein	574	0	Acanthamoeba castellanii str. Neff	1257118	Eukaryota
TRSP12938.t1	Tricho_longreads_scf.00055_302167	phenylalanine-tRNA ligase	373	4.78489e-144	Acanthamoeba castellanii str. Neff	1257118	Eukaryota
TRSP20336.t1	Tricho_longreads_scf.00087_242937	Ubiquitinlike modifier-activating enzyme 1, putative	1016	0	Acanthamoeba castellanii str. Neff	1257118	Eukaryota
TRSP3456.t1	Tricho_longreads_scf.00007_838757	hypothetical protein ACA1_352500	329	1.99218e-125	Acanthamoeba castellanii str. Neff	1257118	Eukaryota
TRSP31862.t1	Tricho_longreads_scf.00451_30818	Rho family, small GTP binding protein Rac3, putative	210	1.75503e-44	Acanthamoeba castellanii str. Neff	1257118	Eukaryota
TRSP21754.t1	Tricho_longreads_scf.00049_317669	phosphoribosylformylglycinamidine synthase	828	0	Acanthamoeba castellanii str. Neff	1257118	Eukaryota
TRSP19706.t1	Tricho_longreads_scf.00072_268357	K+ channel tetramerisation subfamily protein	224	7.67545e-23	Acanthamoeba castellanii str. Neff	1257118	Eukaryota
TRSP20337.t1	Tricho_longreads_scf.00087_242937	transmembrane protein, putative	576	0	Acanthamoeba castellanii str. Neff	1257118	Eukaryota
TRSP16347.t1	Tricho_longreads_scf.00003_1004824	prolyl oligopeptidase	715	0	Acanthamoeba castellanii str. Neff	1257118	Eukaryota
TRSP42067.t1	Tricho_longreads_scf.00037_392589	cullin 1, putative	755	0	Acanthamoeba castellanii str. Neff	1257118	Eukaryota
TRSP22820.t1	Tricho_longreads_scf.00023_491334	enoylCoA hydratase	287	5.81232e-85	Acanthamoeba castellanii str. Neff	1257118	Eukaryota
TRSP24418.t1	Tricho_longreads_scf.00137_165529	elongation factor 1-gamma family protein	981	1.21341e-136	Acanthamoeba castellanii str. Neff	1257118	Eukaryota
TRSP23189.t1	Tricho_longreads_scf.00064_276406	Der1like domain family, member 1, putative	239	6.95534e-61	Acanthamoeba castellanii str. Neff	1257118	Eukaryota
TRSP27458.t1	Tricho_longreads_scf.00076_264950	Rasrelated GTPase	587	5.80972e-56	Acanthamoeba castellanii str. Neff	1257118	Eukaryota
TRSP32996.t1	Tricho_longreads_scf.00025_477026	protein serine/threonine kinase, putative	1233	1.15755e-90	Acanthamoeba castellanii str. Neff	1257118	Eukaryota
TRSP15239.t1	Tricho_longreads_scf.00057_299299	Nacylsphingosine amidohydrolase, putative	421	3.0552e-159	Acanthamoeba castellanii str. Neff	1257118	Eukaryota
TRSP42472.t1	Tricho_longreads_scf.00014_642678	transmembrane protein, putative	403	4.12335e-119	Acanthamoeba castellanii str. Neff	1257118	Eukaryota
TRSP24650.t1	Tricho_longreads_scf.00008_824997	alphaactinin, putative	741	0	Acanthamoeba castellanii str. Neff	1257118	Eukaryota
TRSP28515.t1	Tricho_longreads_scf.00044_330626	hypothetical protein ACA1_071400	262	7.80597e-62	Acanthamoeba castellanii str. Neff	1257118	Eukaryota
TRSP9486.t1	Tricho_longreads_scf.00154_148902	EF hand domain containing protein	139	5.12072e-35	Acanthamoeba castellanii str. Neff	1257118	Eukaryota
TRSP2823.t1	Tricho_longreads_scf.00684_23967	alkaline phosphatase family subfamily protein	350	4.19112e-89	Acanthamoeba castellanii str. Neff	1257118	Eukaryota
TRSP45292.t1	Tricho_longreads_scf.00053_308123	rRNA metabolism protein, SBDS family	250	1.31795e-68	Acanthamoeba castellanii str. Neff	1257118	Eukaryota
TRSP7830.t1	Tricho_longreads_scf.00162_143705	Dolichylphosphate beta-glucosyltransferase	333	4.47844e-98	Acanthamoeba castellanii str. Neff	1257118	Eukaryota
TRSP40336.t1	Tricho_longreads_scf.00031_423553	oxysterolbinding protein-like protein 8 isoform b, putative	376	4.21372e-106	Acanthamoeba castellanii str. Neff	1257118	Eukaryota
TRSP23564.t1	Tricho_longreads_scf.00006_856200	amino acid permease	583	0	Acanthamoeba castellanii str. Neff	1257118	Eukaryota
TRSP30390.t1	Tricho_longreads_scf.00068_270245	actin bundling protein	235	3.1507e-66	Acanthamoeba castellanii str. Neff	1257118	Eukaryota
TRSP26266.t1	Tricho_longreads_scf.00047_322559	protein kinase domain containing protein	651	2.25515e-75	Acanthamoeba castellanii str. Neff	1257118	Eukaryota
TRSP25548.t1	Tricho_longreads_scf.00126_181615	carbamoylphosphate synthase L chain, ATP-binding, putative	713	0	Acanthamoeba castellanii str. Neff	1257118	Eukaryota
TRSP32861.t1	Tricho_longreads_scf.00025_477026	prolyl 4hydroxylase, alpha subunit	234	2.23801e-74	Acanthamoeba castellanii str. Neff	1257118	Eukaryota
TRSP16747.t1	Tricho_longreads_scf.00012_738869	amidohydrolase superfamily protein	527	3.7644e-173	Acanthamoeba castellanii str. Neff	1257118	Eukaryota
TRSP35715.t1	Tricho_longreads_scf.00139_163662	Rho family, small GTP binding protein Rac3, putative	203	2.05951e-54	Acanthamoeba castellanii str. Neff	1257118	Eukaryota
TRSP15058.t1	Tricho_longreads_scf.00274_52897	protein kinase domain containing protein	388	9.92131e-91	Acanthamoeba castellanii str. Neff	1257118	Eukaryota
TRSP13689.t1	Tricho_longreads_scf.00034_409289	protein kinase domain containing protein	388	9.92131e-91	Acanthamoeba castellanii str. Neff	1257118	Eukaryota
TRSP29537.t1	Tricho_longreads_scf.00038_359085	DUF1237 domain protein	468	2.61627e-168	Acanthamoeba castellanii str. Neff	1257118	Eukaryota
TRSP10768.t1	Tricho_longreads_scf.00128_177280	autophagocytosis associated protein, cterminal domain containing protein	173	3.73667e-32	Acanthamoeba castellanii str. Neff	1257118	Eukaryota
TRSP7049.t1	Tricho_longreads_scf.00051_312876	Maflike protein	195	4.25336e-61	Acanthamoeba castellanii str. Neff	1257118	Eukaryota
TRSP27020.t1	Tricho_longreads_scf.00127_179609	peptidylprolyl cis-trans isomerase	182	1.1733e-65	Acanthamoeba castellanii str. Neff	1257118	Eukaryota
TRSP10161.t1	Tricho_longreads_scf.00042_341914	peptidase D, putative	479	6.95278e-170	Acanthamoeba castellanii str. Neff	1257118	Eukaryota
TRSP27415.t1	Tricho_longreads_scf.00076_264950	Ubiquitinlike modifier-activating enzyme 1, putative	1022	0	Acanthamoeba castellanii str. Neff	1257118	Eukaryota
TRSP4101.t1	Tricho_longreads_scf.00103_214222	SNF2 family Nterminal domain containing protein	2362	0	Acanthamoeba castellanii str. Neff	1257118	Eukaryota
TRSP25605.t1	Tricho_longreads_scf.00091_235394	mitochondrial ribosomal protein L51/S25/CIB8 family protein	132	1.5477e-28	Acanthamoeba castellanii str. Neff	1257118	Eukaryota
TRSP24163.t1	Tricho_longreads_scf.00560_26948	coatomer subunit gamma, putative	870	0	Acanthamoeba castellanii str. Neff	1257118	Eukaryota
TRSP37969.t1	Tricho_longreads_scf.00218_87045	cell cycle control protein	308	2.86337e-112	Acanthamoeba castellanii str. Neff	1257118	Eukaryota
TRSP12840.t1	Tricho_longreads_scf.00213_91158	cell cycle control protein	308	2.86337e-112	Acanthamoeba castellanii str. Neff	1257118	Eukaryota
TRSP11306.t1	Tricho_longreads_scf.00030_432512	COP9 signalosome subunit 6, putative	333	1.21616e-93	Acanthamoeba castellanii str. Neff	1257118	Eukaryota
TRSP14306.t1	Tricho_longreads_scf.00001_1255013	farnesyldiphosphate farnesyltransferase	448	1.62252e-123	Acanthamoeba castellanii str. Neff	1257118	Eukaryota
TRSP9435.t1	Tricho_longreads_scf.00154_148902	regulatory-associated protein of mTOR, putative	1188	0	Acanthamoeba castellanii str. Neff	1257118	Eukaryota
TRSP44048.t1	Tricho_longreads_scf.00009_791302	cellulase (glycosyl hydrolase family 5) subfamily protein	396	1.27023e-142	Acanthamoeba castellanii str. Neff	1257118	Eukaryota
TRSP16943.t1	Tricho_longreads_scf.00002_1182365	serine/threonineprotein kinase	1001	7.78286e-79	Acanthamoeba castellanii str. Neff	1257118	Eukaryota
TRSP14833.t1	Tricho_longreads_scf.00027_457298	Rasrelated protein Rab5, putative	223	5.50854e-64	Acanthamoeba castellanii str. Neff	1257118	Eukaryota
TRSP22417.t1	Tricho_longreads_scf.00104_213812	hypothetical protein ACA1_208300	472	4.29955e-109	Acanthamoeba castellanii str. Neff	1257118	Eukaryota
TRSP27438.t1	Tricho_longreads_scf.00076_264950	oxidoreductase, zincbinding dehydrogenase, putative	382	1.14225e-118	Acanthamoeba castellanii str. Neff	1257118	Eukaryota
TRSP23489.t1	Tricho_longreads_scf.00234_73455	hypothetical protein ACA1_036220	88	5.70586e-12	Acanthamoeba castellanii str. Neff	1257118	Eukaryota
TRSP11330.t1	Tricho_longreads_scf.00030_432512	L-2-hydroxyglutarate dehydrogenase, mitochondrial precursor, putative	367	3.09736e-118	Acanthamoeba castellanii str. Neff	1257118	Eukaryota
TRSP32114.t1	Tricho_longreads_scf.00266_55260	cycloartenol synthase	734	0	Acanthamoeba castellanii str. Neff	1257118	Eukaryota
TRSP13299.t1	Tricho_longreads_scf.00010_779600	serine carboxypeptidase	455	2.43647e-157	Acanthamoeba castellanii str. Neff	1257118	Eukaryota
TRSP31963.t1	Tricho_longreads_scf.00141_160753	Expansin, putative	253	4.6335e-72	Acanthamoeba castellanii str. Neff	1257118	Eukaryota
TRSP22475.t1	Tricho_longreads_scf.00188_116124	RNA recognition domain containing protein	409	2.01067e-15	Acanthamoeba castellanii str. Neff	1257118	Eukaryota
TRSP23780.t1	Tricho_longreads_scf.00006_856200	Ubiquitinconjugating enzyme subfamily protein	274	4.16651e-64	Acanthamoeba castellanii str. Neff	1257118	Eukaryota
TRSP14377.t1	Tricho_longreads_scf.00001_1255013	Ubiquitinconjugating enzyme subfamily protein	205	5.55921e-55	Acanthamoeba castellanii str. Neff	1257118	Eukaryota
TRSP13869.t1	Tricho_longreads_scf.00093_229579	Na+/H+ antiporter	597	7.97732e-130	Acanthamoeba castellanii str. Neff	1257118	Eukaryota
TRSP13960.t1	Tricho_longreads_scf.00001_1255013	Synapsin, putative	314	6.37103e-91	Acanthamoeba castellanii str. Neff	1257118	Eukaryota
TRSP25047.t1	Tricho_longreads_scf.00313_43357	DTW domain containing 1, putative	243	3.74864e-59	Acanthamoeba castellanii str. Neff	1257118	Eukaryota
TRSP15514.t1	Tricho_longreads_scf.00147_156433	Serine/threonineprotein kinase bud32, putative	228	9.06235e-71	Acanthamoeba castellanii str. Neff	1257118	Eukaryota
TRSP24678.t1	Tricho_longreads_scf.00008_824997	WD repeat containing protein	302	1.75097e-106	Acanthamoeba castellanii str. Neff	1257118	Eukaryota
TRSP7833.t1	Tricho_longreads_scf.00162_143705	hypothetical protein ACA1_089180	259	4.17798e-41	Acanthamoeba castellanii str. Neff	1257118	Eukaryota
TRSP4127.t1	Tricho_longreads_scf.00103_214222	tetratricopeptide repeat domain containing protein	1462	0	Acanthamoeba castellanii str. Neff	1257118	Eukaryota
TRSP31802.t1	Tricho_longreads_scf.00293_47041	opioid growth factor receptor (ogfr) region protein, putative	252	1.02273e-67	Acanthamoeba castellanii str. Neff	1257118	Eukaryota
TRSP29503.t1	Tricho_longreads_scf.00038_359085	cellulase (glycosyl hydrolase family 5) subfamily protein	387	1.38063e-142	Acanthamoeba castellanii str. Neff	1257118	Eukaryota
TRSP30213.t1	Tricho_longreads_scf.00082_257650	lysosomal ProX carboxypeptidase	467	9.00278e-167	Acanthamoeba castellanii str. Neff	1257118	Eukaryota
TRSP20398.t1	Tricho_longreads_scf.00203_103303	Zndependent dipeptidase	437	8.92384e-137	Acanthamoeba castellanii str. Neff	1257118	Eukaryota
TRSP15140.t1	Tricho_longreads_scf.00146_158180	EF hand domain containing protein	256	1.54818e-48	Acanthamoeba castellanii str. Neff	1257118	Eukaryota
TRSP26867.t1	Tricho_longreads_scf.00048_319196	hypothetical protein ACA1_259530	493	4.6132e-41	Acanthamoeba castellanii str. Neff	1257118	Eukaryota
TRSP30084.t1	Tricho_longreads_scf.00151_152232	hypothetical protein ACA1_253340	264	2.29372e-21	Acanthamoeba castellanii str. Neff	1257118	Eukaryota
TRSP45266.t1	Tricho_longreads_scf.00053_308123	hydrolase, NUDIX family protein	620	3.95638e-63	Acanthamoeba castellanii str. Neff	1257118	Eukaryota
TRSP12783.t1	Tricho_longreads_scf.00116_197489	RapGAP/RanGAP domain containing protein	421	2.02471e-76	Acanthamoeba castellanii str. Neff	1257118	Eukaryota
TRSP29350.t1	Tricho_longreads_scf.00121_192605	Nacylsphingosine amidohydrolase, putative	346	3.8329e-127	Acanthamoeba castellanii str. Neff	1257118	Eukaryota
TRSP12635.t1	Tricho_longreads_scf.00123_190498	Roadblock/LC7 domain containing protein	118	7.8291e-23	Acanthamoeba castellanii str. Neff	1257118	Eukaryota
TRSP22002.t1	Tricho_longreads_scf.00005_925709	SAM domain (Sterile alpha motif) domain containing protein	175	8.79859e-05	Acanthamoeba castellanii str. Neff	1257118	Eukaryota
TRSP12972.t1	Tricho_longreads_scf.00055_302167	acyloxyacyl hydrolase	580	0	Acanthamoeba castellanii str. Neff	1257118	Eukaryota
TRSP17543.t1	Tricho_longreads_scf.00069_270160	actin subfamily protein	154	9.16438e-34	Acanthamoeba castellanii str. Neff	1257118	Eukaryota
TRSP8845.t1	Tricho_longreads_scf.00571_26685	dual specificity phosphatase, catalytic domain containing protein	450	3.40461e-89	Acanthamoeba castellanii str. Neff	1257118	Eukaryota
TRSP39402.t1	Tricho_longreads_scf.00018_567815	Lsorbosone dehydrogenase	412	3.03725e-146	Acanthamoeba castellanii str. Neff	1257118	Eukaryota
TRSP3251.t1	Tricho_longreads_scf.00217_88237	premRNA cleavage complex subunit	423	2.194e-146	Acanthamoeba castellanii str. Neff	1257118	Eukaryota
TRSP33569.t1	Tricho_longreads_scf.00020_510754	dipeptidyl-peptidase family protein	486	1.06126e-165	Acanthamoeba castellanii str. Neff	1257118	Eukaryota
TRSP16276.t1	Tricho_longreads_scf.00003_1004824	SCP2 sterol transfer family protein	236	3.95089e-63	Acanthamoeba castellanii str. Neff	1257118	Eukaryota
TRSP15136.t1	Tricho_longreads_scf.00146_158180	Camk2b protein	347	3.32527e-86	Acanthamoeba castellanii str. Neff	1257118	Eukaryota
TRSP33704.t1	Tricho_longreads_scf.00202_103780	tyrosine-tRNA ligase	534	2.02908e-164	Acanthamoeba castellanii str. Neff	1257118	Eukaryota
TRSP12747.t1	Tricho_longreads_scf.00116_197489	membranebound transcription factor protease, site 1 isoform 1, putative	966	0	Acanthamoeba castellanii str. Neff	1257118	Eukaryota
TRSP44031.t1	Tricho_longreads_scf.00009_791302	Rasrelated GTPase	167	2.35565e-42	Acanthamoeba castellanii str. Neff	1257118	Eukaryota
TRSP17004.t1	Tricho_longreads_scf.00002_1182365	transcription factor iia, alpha/beta subunit protein	461	1.47117e-09	Acanthamoeba castellanii str. Neff	1257118	Eukaryota
TRSP10723.t1	Tricho_longreads_scf.00078_262981	acylCoA synthetase, putative	687	0	Acanthamoeba castellanii str. Neff	1257118	Eukaryota
TRSP33735.t1	Tricho_longreads_scf.00221_85164	ATPase, AAA domain containing protein	661	0	Acanthamoeba castellanii str. Neff	1257118	Eukaryota
TRSP10763.t1	Tricho_longreads_scf.00128_177280	ATPase, AAA domain containing protein	661	0	Acanthamoeba castellanii str. Neff	1257118	Eukaryota
TRSP25224.t1	Tricho_longreads_scf.00098_222063	leucine-tRNA ligase	1087	0	Acanthamoeba castellanii str. Neff	1257118	Eukaryota
TRSP39083.t1	Tricho_longreads_scf.00075_266310	IPT/TIG domain containing protein	485	8.03367e-51	Acanthamoeba castellanii str. Neff	1257118	Eukaryota
TRSP39085.t1	Tricho_longreads_scf.00075_266310	IPT/TIG domain containing protein	465	4.81626e-51	Acanthamoeba castellanii str. Neff	1257118	Eukaryota
TRSP23016.t1	Tricho_longreads_scf.00061_286003	dual specificity phosphatase, catalytic domain containing protein	519	4.97066e-78	Acanthamoeba castellanii str. Neff	1257118	Eukaryota
TRSP8482.t1	Tricho_longreads_scf.00220_85460	von Willebrand factor type A domain containing protein	445	2.31798e-128	Acanthamoeba castellanii str. Neff	1257118	Eukaryota
TRSP10163.t1	Tricho_longreads_scf.00042_341914	initiation factor, subunit 2 family protein	415	2.49252e-114	Acanthamoeba castellanii str. Neff	1257118	Eukaryota
TRSP12004.t1	Tricho_longreads_scf.00067_272662	glycolate dehydrogenase	998	0	Acanthamoeba castellanii str. Neff	1257118	Eukaryota
TRSP40657.t1	Tricho_longreads_scf.00236_72682	transcriptional regulator, Sir2, putative	387	3.48096e-75	Acanthamoeba castellanii str. Neff	1257118	Eukaryota
TRSP22784.t1	Tricho_longreads_scf.00023_491334	PhytanoylCoA dioxygenase (PhyH) superfamily protein	317	5.30893e-107	Acanthamoeba castellanii str. Neff	1257118	Eukaryota
TRSP44021.t1	Tricho_longreads_scf.00009_791302	ATPase, AAA domain containing protein	616	2.2719e-151	Acanthamoeba castellanii str. Neff	1257118	Eukaryota
TRSP23847.t1	Tricho_longreads_scf.00105_211905	peptidylprolyl cis-trans isomerase, FKBP-type domain containing protein	448	1.61152e-113	Acanthamoeba castellanii str. Neff	1257118	Eukaryota
TRSP22584.t1	Tricho_longreads_scf.00172_134011	kinesin motor domain containing protein	659	1.12216e-99	Acanthamoeba castellanii str. Neff	1257118	Eukaryota
TRSP4326.t1	Tricho_longreads_scf.00302_45046	RapGAP/RanGAP domain containing protein	1012	1.36456e-61	Acanthamoeba castellanii str. Neff	1257118	Eukaryota
TRSP25576.t1	Tricho_longreads_scf.01113_18218	EF hand domain containing protein	289	2.85968e-49	Acanthamoeba castellanii str. Neff	1257118	Eukaryota
TRSP6139.t1	Tricho_longreads_scf.00058_297874	EF hand domain containing protein	289	2.85968e-49	Acanthamoeba castellanii str. Neff	1257118	Eukaryota
TRSP6960.t1	Tricho_longreads_scf.00179_128070	phosphoglycerate mutase family protein	321	4.46748e-82	Acanthamoeba castellanii str. Neff	1257118	Eukaryota
TRSP19204.t1	Tricho_longreads_scf.00024_484723	Serine/threonine phosphatase	186	2.08372e-56	Acanthamoeba castellanii str. Neff	1257118	Eukaryota
TRSP18698.t1	Tricho_longreads_scf.00015_607500	hypothetical protein ACA1_309640	437	4.59362e-81	Acanthamoeba castellanii str. Neff	1257118	Eukaryota
TRSP23343.t1	Tricho_longreads_scf.00111_202777	CUE domain containing protein	453	3.39611e-149	Acanthamoeba castellanii str. Neff	1257118	Eukaryota
TRSP10753.t1	Tricho_longreads_scf.00078_262981	gammaglutamyltransferase	609	1.03857e-167	Acanthamoeba castellanii str. Neff	1257118	Eukaryota
TRSP28456.t1	Tricho_longreads_scf.00044_330626	alanine-tRNA ligase	946	0	Acanthamoeba castellanii str. Neff	1257118	Eukaryota
TRSP26669.t1	Tricho_longreads_scf.00063_281444	SWIM zinc finger domain containing protein	165	1.65232e-05	Acanthamoeba castellanii str. Neff	1257118	Eukaryota
TRSP21261.t1	Tricho_longreads_scf.00028_441143	protein serine/threonine kinase, putative	426	2.04414e-130	Acanthamoeba castellanii str. Neff	1257118	Eukaryota
TRSP4108.t1	Tricho_longreads_scf.00103_214222	leukotriene A4 hydrolase/aminopeptidase	606	0	Acanthamoeba castellanii str. Neff	1257118	Eukaryota
TRSP19344.t1	Tricho_longreads_scf.00024_484723	major vault protein alpha, putative	435	8.77428e-126	Acanthamoeba castellanii str. Neff	1257118	Eukaryota
TRSP25962.t1	Tricho_longreads_scf.00017_602044	guanine nucleotide-binding protein alpha-5 subunit, putative	354	1.10435e-100	Acanthamoeba castellanii str. Neff	1257118	Eukaryota
TRSP7493.t1	Tricho_longreads_scf.00016_607116	RNA binding protein	516	5.04044e-172	Acanthamoeba castellanii str. Neff	1257118	Eukaryota
TRSP26717.t1	Tricho_longreads_scf.00063_281444	RNA recognition motif domain containing protein	453	3.75629e-84	Acanthamoeba castellanii str. Neff	1257118	Eukaryota
TRSP44579.t1	Tricho_longreads_scf.00011_772879	UBA/TS-N domain containing protein	283	7.3012e-39	Acanthamoeba castellanii str. Neff	1257118	Eukaryota
TRSP18833.t1	Tricho_longreads_scf.00015_607500	cytochrome c oxidase assembly protein cox15, putative	397	4.11856e-110	Acanthamoeba castellanii str. Neff	1257118	Eukaryota
TRSP14789.t1	Tricho_longreads_scf.00263_56793	Appr1-p processing enzyme family protein, putative	286	7.46888e-68	Acanthamoeba castellanii str. Neff	1257118	Eukaryota
TRSP31174.t1	Tricho_longreads_scf.00178_128213	Appr1-p processing enzyme family protein, putative	313	2.55457e-67	Acanthamoeba castellanii str. Neff	1257118	Eukaryota
TRSP33381.t1	Tricho_longreads_scf.00582_26461	homeobox domain containing protein	602	4.01317e-29	Acanthamoeba castellanii str. Neff	1257118	Eukaryota
TRSP25858.t1	Tricho_longreads_scf.00017_602044	Ca2+dependent endoplasmic reticulum nucleoside diphosphatase isoform 3, putative	311	3.6762e-87	Acanthamoeba castellanii str. Neff	1257118	Eukaryota
TRSP7498.t1	Tricho_longreads_scf.00016_607116	vesicle trafficking protein, putative	1217	1.28586e-45	Acanthamoeba castellanii str. Neff	1257118	Eukaryota
TRSP24735.t1	Tricho_longreads_scf.00008_824997	rho guanine dissociation factor isoform 2, putative	231	2.01897e-56	Acanthamoeba castellanii str. Neff	1257118	Eukaryota
TRSP12235.t1	Tricho_longreads_scf.00088_238416	palmitoylprotein thioesterase precursor, putative	490	2.40038e-65	Acanthamoeba castellanii str. Neff	1257118	Eukaryota
TRSP2682.t1	Tricho_longreads_scf.00167_138674	phytol kinase 2, putative	235	1.64707e-63	Acanthamoeba castellanii str. Neff	1257118	Eukaryota
TRSP25220.t1	Tricho_longreads_scf.00098_222063	hypothetical protein ACA1_176100	166	2.86601e-15	Acanthamoeba castellanii str. Neff	1257118	Eukaryota
TRSP27427.t1	Tricho_longreads_scf.00076_264950	opioid growth factor receptor (ogfr) region protein, putative	601	6.25314e-59	Acanthamoeba castellanii str. Neff	1257118	Eukaryota
TRSP43109.t1	Tricho_longreads_scf.02458_10703	Autophagyrelated protein 12, putative	132	6.35349e-35	Acanthamoeba castellanii str. Neff	1257118	Eukaryota
TRSP39343.t1	Tricho_longreads_scf.00018_567815	Autophagyrelated protein 12, putative	132	6.4939e-35	Acanthamoeba castellanii str. Neff	1257118	Eukaryota
TRSP16381.t1	Tricho_longreads_scf.00003_1004824	2OGFe(II) oxygenase family oxidoreductase	252	6.43259e-59	Acanthamoeba castellanii str. Neff	1257118	Eukaryota
TRSP18441.t1	Tricho_longreads_scf.00029_440001	Rasrelated protein ORAB-1, putative	581	1.49603e-42	Acanthamoeba castellanii str. Neff	1257118	Eukaryota
TRSP12151.t1	Tricho_longreads_scf.00156_147190	NIPSNAP family protein	260	5.09188e-51	Acanthamoeba castellanii str. Neff	1257118	Eukaryota
TRSP20742.t1	Tricho_longreads_scf.00026_458223	vacuolar proton ATPase, putative	847	0	Acanthamoeba castellanii str. Neff	1257118	Eukaryota
TRSP23045.t1	Tricho_longreads_scf.00061_286003	ATPase, AAA domain containing protein	308	8.49245e-56	Acanthamoeba castellanii str. Neff	1257118	Eukaryota
TRSP42711.t1	Tricho_longreads_scf.00096_227714	hypothetical protein ACA1_128190	109	6.54046e-22	Acanthamoeba castellanii str. Neff	1257118	Eukaryota
TRSP479.t1	Tricho_longreads_scf.00347_38573	phospholipase, putative	149	1.50447e-30	Acanthamoeba castellanii str. Neff	1257118	Eukaryota
TRSP669.t1	Tricho_longreads_scf.01189_17478	2OGFe(II) oxygenase family oxidoreductase	196	2.84312e-49	Acanthamoeba castellanii str. Neff	1257118	Eukaryota
TRSP24648.t1	Tricho_longreads_scf.00008_824997	3' exoribonuclease family, domain 1 domain containing protein	258	1.38326e-51	Acanthamoeba castellanii str. Neff	1257118	Eukaryota
TRSP4125.t1	Tricho_longreads_scf.00103_214222	ADPribosylation factor, putative	569	3.41401e-34	Acanthamoeba castellanii str. Neff	1257118	Eukaryota
TRSP30224.t1	Tricho_longreads_scf.00082_257650	K+ channel tetramerisation subfamily protein	247	2.17404e-14	Acanthamoeba castellanii str. Neff	1257118	Eukaryota
TRSP29456.t1	Tricho_longreads_scf.00038_359085	vacuolar sorting protein, putative	653	0	Acanthamoeba castellanii str. Neff	1257118	Eukaryota
TRSP16814.t1	Tricho_longreads_scf.00012_738869	amino acid adenylation subfamily protein	1482	0	Acanthamoeba castellanii str. Neff	1257118	Eukaryota
TRSP17603.t1	Tricho_longreads_scf.00186_116445	GTPbinding protein	221	1.23578e-39	Acanthamoeba castellanii str. Neff	1257118	Eukaryota
TRSP16909.t1	Tricho_longreads_scf.00002_1182365	calponin	246	9.25032e-07	Acanthamoeba castellanii str. Neff	1257118	Eukaryota
TRSP26200.t1	Tricho_longreads_scf.00047_322559	major vault protein alpha, putative	438	3.83734e-128	Acanthamoeba castellanii str. Neff	1257118	Eukaryota
TRSP22164.t1	Tricho_longreads_scf.00005_925709	p53 inducible protein	1363	0	Acanthamoeba castellanii str. Neff	1257118	Eukaryota
TRSP31987.t1	Tricho_longreads_scf.00141_160753	AlphaN-acetylglucosaminidase (NAGLU)	805	0	Acanthamoeba castellanii str. Neff	1257118	Eukaryota
TRSP23874.t1	Tricho_longreads_scf.00105_211905	OTUlike cysteine protease	374	2.22161e-70	Acanthamoeba castellanii str. Neff	1257118	Eukaryota
TRSP11116.t1	Tricho_longreads_scf.00238_71830	GTPase of unknown function subfamily protein	394	8.89129e-98	Acanthamoeba castellanii str. Neff	1257118	Eukaryota
TRSP17845.t1	Tricho_longreads_scf.00046_325925	SH3 domain containing protein	291	3.47627e-33	Acanthamoeba castellanii str. Neff	1257118	Eukaryota
TRSP7053.t1	Tricho_longreads_scf.00051_312876	ChaC, cation transport regulatorlike 2, putative	153	5.61022e-37	Acanthamoeba castellanii str. Neff	1257118	Eukaryota
TRSP31803.t1	Tricho_longreads_scf.00293_47041	arginine-tRNA ligase	645	0	Acanthamoeba castellanii str. Neff	1257118	Eukaryota
TRSP24056.t1	Tricho_longreads_scf.00022_503607	thiamine pyrophosphokinase	247	3.14909e-56	Acanthamoeba castellanii str. Neff	1257118	Eukaryota
TRSP12046.t1	Tricho_longreads_scf.00067_272662	WD40 repeat protein, COMPASS complex protein	437	2.81497e-107	Acanthamoeba castellanii str. Neff	1257118	Eukaryota
TRSP30592.t1	Tricho_longreads_scf.00102_215809	phosphoglycerate mutase family protein	349	4.67521e-101	Acanthamoeba castellanii str. Neff	1257118	Eukaryota
TRSP42561.t1	Tricho_longreads_scf.00014_642678	Transmembrane protein, putative	264	1.8811e-62	Acanthamoeba castellanii str. Neff	1257118	Eukaryota
TRSP23783.t1	Tricho_longreads_scf.00006_856200	Kynurenine Aminotransferase	376	6.22251e-127	Acanthamoeba castellanii str. Neff	1257118	Eukaryota
TRSP35598.t1	Tricho_longreads_scf.00182_119534	hypothetical protein ACA1_259000	726	1.59436e-34	Acanthamoeba castellanii str. Neff	1257118	Eukaryota
TRSP40353.t1	Tricho_longreads_scf.00031_423553	hypothetical protein ACA1_253170	439	3.37283e-63	Acanthamoeba castellanii str. Neff	1257118	Eukaryota
TRSP13998.t1	Tricho_longreads_scf.00001_1255013	protein kinase domain containing protein	555	4.77286e-138	Acanthamoeba castellanii str. Neff	1257118	Eukaryota
TRSP12154.t1	Tricho_longreads_scf.00156_147190	RapGAP/RanGAP domain containing protein	644	1.44724e-65	Acanthamoeba castellanii str. Neff	1257118	Eukaryota
TRSP6697.t1	Tricho_longreads_scf.00362_36848	protein kinase, putative	936	9.61621e-61	Acanthamoeba castellanii str. Neff	1257118	Eukaryota
TRSP24623.t1	Tricho_longreads_scf.00008_824997	signal peptidase I, putative	153	7.0642e-53	Acanthamoeba castellanii str. Neff	1257118	Eukaryota
TRSP18026.t1	Tricho_longreads_scf.00193_113068	dual specificity phosphatase, putative	230	1.39539e-58	Acanthamoeba castellanii str. Neff	1257118	Eukaryota
TRSP39773.t1	Tricho_longreads_scf.00209_95378	EF hand domain containing protein	279	1.0609e-54	Acanthamoeba castellanii str. Neff	1257118	Eukaryota
TRSP19364.t1	Tricho_longreads_scf.00024_484723	U4/U6 small nuclear ribonucleoprotein Prp4, putative	506	2.86762e-137	Acanthamoeba castellanii str. Neff	1257118	Eukaryota
TRSP10930.t1	Tricho_longreads_scf.00099_221761	Camk2b protein	418	4.91634e-76	Acanthamoeba castellanii str. Neff	1257118	Eukaryota
TRSP32592.t1	Tricho_longreads_scf.00101_216346	3'5' exonuclease domain containing protein	848	3.97188e-149	Acanthamoeba castellanii str. Neff	1257118	Eukaryota
TRSP44027.t1	Tricho_longreads_scf.00009_791302	ATPase, AAA domain containing protein	627	2.72578e-159	Acanthamoeba castellanii str. Neff	1257118	Eukaryota
TRSP12166.t1	Tricho_longreads_scf.00298_45997	serine/threonine kinase	471	6.08651e-101	Acanthamoeba castellanii str. Neff	1257118	Eukaryota
TRSP19135.t1	Tricho_longreads_scf.00125_182297	phospholipidtranslocating P-type ATPase family protein	1182	0	Acanthamoeba castellanii str. Neff	1257118	Eukaryota
TRSP41903.t1	Tricho_longreads_scf.00417_32730	OTUlike cysteine protease	359	1.8812e-71	Acanthamoeba castellanii str. Neff	1257118	Eukaryota
TRSP24063.t1	Tricho_longreads_scf.00022_503607	Ser/Thr phosphatase family superfamily protein	267	5.96472e-64	Acanthamoeba castellanii str. Neff	1257118	Eukaryota
TRSP14518.t1	Tricho_longreads_scf.00214_91147	EF hand domain containing protein	243	1.89873e-55	Acanthamoeba castellanii str. Neff	1257118	Eukaryota
TRSP10170.t1	Tricho_longreads_scf.00042_341914	repressor of rna polymerase iii transcription, putative	224	1.59692e-52	Acanthamoeba castellanii str. Neff	1257118	Eukaryota
TRSP29770.t1	Tricho_longreads_scf.00117_196398	protein kinase, putative	674	4.1875e-62	Acanthamoeba castellanii str. Neff	1257118	Eukaryota
TRSP26035.t1	Tricho_longreads_scf.00036_403022	saccharopine dehydrogenase	418	3.09059e-136	Acanthamoeba castellanii str. Neff	1257118	Eukaryota
TRSP18851.t1	Tricho_longreads_scf.00015_607500	hydrolase, alpha/beta fold domain containing protein	383	2.29767e-104	Acanthamoeba castellanii str. Neff	1257118	Eukaryota
TRSP7841.t1	Tricho_longreads_scf.00162_143705	SPRY domain containing protein	1783	0	Acanthamoeba castellanii str. Neff	1257118	Eukaryota
TRSP15691.t1	Tricho_longreads_scf.00040_356269	COMM domain containing protein 2, putative	201	1.80715e-52	Acanthamoeba castellanii str. Neff	1257118	Eukaryota
TRSP3697.t1	Tricho_longreads_scf.00007_838757	hypothetical protein ACA1_037450	264	5.42314e-33	Acanthamoeba castellanii str. Neff	1257118	Eukaryota
TRSP8271.t1	Tricho_longreads_scf.01316_16289	Dual specificity protein kinase shkC, putative	407	3.30557e-97	Acanthamoeba castellanii str. Neff	1257118	Eukaryota
TRSP17987.t1	Tricho_longreads_scf.00207_97835	lipase A precursor family protein	390	1.18755e-109	Acanthamoeba castellanii str. Neff	1257118	Eukaryota
TRSP18046.t1	Tricho_longreads_scf.00193_113068	MAP kinseERK kinase	360	3.63065e-93	Acanthamoeba castellanii str. Neff	1257118	Eukaryota
TRSP7006.t1	Tricho_longreads_scf.00179_128070	MAP kinseERK kinase	360	3.63065e-93	Acanthamoeba castellanii str. Neff	1257118	Eukaryota
TRSP9878.t1	Tricho_longreads_scf.00004_931448	transmembrane protein 93, putative	132	6.38082e-10	Acanthamoeba castellanii str. Neff	1257118	Eukaryota
TRSP33003.t1	Tricho_longreads_scf.00025_477026	transcriptional repressor TUP1, putative	626	0	Acanthamoeba castellanii str. Neff	1257118	Eukaryota
TRSP9090.t1	Tricho_longreads_scf.00185_117083	hypothetical protein ACA1_400250	183	1.78569e-39	Acanthamoeba castellanii str. Neff	1257118	Eukaryota
TRSP1751.t1	Tricho_longreads_scf.00590_26397	hypothetical protein ACA1_255670	347	5.85123e-102	Acanthamoeba castellanii str. Neff	1257118	Eukaryota
TRSP4161.t1	Tricho_longreads_scf.00103_214222	protein kinase domain containing protein	613	2.15866e-59	Acanthamoeba castellanii str. Neff	1257118	Eukaryota
TRSP764.t1	Tricho_longreads_scf.01672_13801	acetyltransferase, GNAT superfamily protein	190	1.55354e-62	Acanthamoeba castellanii str. Neff	1257118	Eukaryota
TRSP10388.t1	Tricho_longreads_scf.00033_419090	hypothetical protein ACA1_109760	619	1.19344e-61	Acanthamoeba castellanii str. Neff	1257118	Eukaryota
TRSP21657.t1	Tricho_longreads_scf.00049_317669	GDSLlike lipase/acylhydrolase domain containing protein	574	4.47151e-93	Acanthamoeba castellanii str. Neff	1257118	Eukaryota
TRSP11080.t1	Tricho_longreads_scf.00059_288384	IPT/TIG domain containing protein	630	3.18836e-43	Acanthamoeba castellanii str. Neff	1257118	Eukaryota
TRSP44071.t1	Tricho_longreads_scf.00009_791302	diacylglycerol kinase	1393	2.3139e-122	Acanthamoeba castellanii str. Neff	1257118	Eukaryota
TRSP24712.t1	Tricho_longreads_scf.00008_824997	kinesin motor domain containing protein	731	1.09112e-43	Acanthamoeba castellanii str. Neff	1257118	Eukaryota
TRSP23425.t1	Tricho_longreads_scf.01269_16739	HEAT repeat domain containing protein	619	5.47943e-153	Acanthamoeba castellanii str. Neff	1257118	Eukaryota
TRSP42713.t1	Tricho_longreads_scf.00096_227714	SAM domain (Sterile alpha motif) domain containing protein	441	8.1162e-41	Acanthamoeba castellanii str. Neff	1257118	Eukaryota
TRSP41973.t1	Tricho_longreads_scf.00037_392589	G-protein beta WD-40 repeat domain containing protein	578	7.06102e-96	Acanthamoeba castellanii str. Neff	1257118	Eukaryota
TRSP4998.t1	Tricho_longreads_scf.00062_284551	lipase A precursor family protein	380	2.85132e-110	Acanthamoeba castellanii str. Neff	1257118	Eukaryota
TRSP19478.t1	Tricho_longreads_scf.00204_102768	alpha1,2-mannosidase subfamily protein	1200	0	Acanthamoeba castellanii str. Neff	1257118	Eukaryota
TRSP29903.t1	Tricho_longreads_scf.00726_23228	homeobox domain containing protein	555	1.21783e-29	Acanthamoeba castellanii str. Neff	1257118	Eukaryota
TRSP32979.t1	Tricho_longreads_scf.00025_477026	macro domain containing protein	223	1.19735e-64	Acanthamoeba castellanii str. Neff	1257118	Eukaryota
TRSP32569.t1	Tricho_longreads_scf.00101_216346	hypothetical protein ACA1_384030	380	5.31929e-109	Acanthamoeba castellanii str. Neff	1257118	Eukaryota
TRSP28909.t1	Tricho_longreads_scf.01095_18447	phosphoinositide 3kinase family, accessory domain (pik domain) domain containing protein	1540	0	Acanthamoeba castellanii str. Neff	1257118	Eukaryota
TRSP21315.t1	Tricho_longreads_scf.00028_441143	hypothetical protein ACA1_392980	397	3.88911e-75	Acanthamoeba castellanii str. Neff	1257118	Eukaryota
TRSP31964.t1	Tricho_longreads_scf.00141_160753	histidinol dehydrogenase	2132	0	Acanthamoeba castellanii str. Neff	1257118	Eukaryota
TRSP25362.t1	Tricho_longreads_scf.00166_140178	Na+/H+ antiporter	567	2.71623e-102	Acanthamoeba castellanii str. Neff	1257118	Eukaryota
TRSP7722.t1	Tricho_longreads_scf.00097_222757	hypothetical protein ACA1_115350	199	2.89284e-33	Acanthamoeba castellanii str. Neff	1257118	Eukaryota
TRSP22377.t1	Tricho_longreads_scf.00104_213812	nicotinate phosphoribosyltransferase, (NAPRTase) subfamily protein	126	6.37047e-35	Acanthamoeba castellanii str. Neff	1257118	Eukaryota
TRSP9742.t1	Tricho_longreads_scf.00004_931448	eukaryotic initiation factor, putative	287	1.525e-61	Acanthamoeba castellanii str. Neff	1257118	Eukaryota
TRSP25184.t1	Tricho_longreads_scf.00098_222063	myosin head (motor domain) domain containing protein	942	0	Acanthamoeba castellanii str. Neff	1257118	Eukaryota
TRSP20765.t1	Tricho_longreads_scf.00026_458223	peptidase S9, prolyl oligopeptidase active site region, putative	447	2.84328e-13	Acanthamoeba castellanii str. Neff	1257118	Eukaryota
TRSP25501.t1	Tricho_longreads_scf.00126_181615	MAP kinase phosphatase 6, putative	215	8.47473e-44	Acanthamoeba castellanii str. Neff	1257118	Eukaryota
TRSP44022.t1	Tricho_longreads_scf.00009_791302	ATPase, AAA domain containing protein	581	3.17163e-123	Acanthamoeba castellanii str. Neff	1257118	Eukaryota
TRSP13161.t1	Tricho_longreads_scf.00114_200515	tetraspanning membrane protein, SFT2like protein	152	9.92385e-28	Acanthamoeba castellanii str. Neff	1257118	Eukaryota
TRSP29247.t1	Tricho_longreads_scf.00066_273239	DNA repair helicase rad25 subfamily protein	1179	1.24751e-127	Acanthamoeba castellanii str. Neff	1257118	Eukaryota
TRSP24983.t1	Tricho_longreads_scf.00237_71878	phosphoinositide 3kinase family, accessory domain (pik domain) domain containing protein	1578	2.64526e-179	Acanthamoeba castellanii str. Neff	1257118	Eukaryota
TRSP3549.t1	Tricho_longreads_scf.00007_838757	amine oxidase family protein	524	1.74393e-107	Acanthamoeba castellanii str. Neff	1257118	Eukaryota
TRSP13656.t1	Tricho_longreads_scf.00034_409289	serine/threonine kinase	526	7.92159e-66	Acanthamoeba castellanii str. Neff	1257118	Eukaryota
TRSP7849.t1	Tricho_longreads_scf.00162_143705	multidrug resistanceassociated protein, putative	1429	0	Acanthamoeba castellanii str. Neff	1257118	Eukaryota
TRSP18000.t1	Tricho_longreads_scf.00207_97835	lipase A precursor family protein	383	1.08408e-108	Acanthamoeba castellanii str. Neff	1257118	Eukaryota
TRSP36426.t1	Tricho_longreads_scf.00160_144821	Ras-related protein Rab-7A	153	9.31496e-39	Acanthamoeba castellanii str. Neff	1257118	Eukaryota
TRSP40219.t1	Tricho_longreads_scf.00180_127864	MutT domain protein-like family protein	264	2.88611e-70	Acanthamoeba castellanii str. Neff	1257118	Eukaryota
TRSP22972.t1	Tricho_longreads_scf.00061_286003	MutT domain protein-like family protein	264	2.88611e-70	Acanthamoeba castellanii str. Neff	1257118	Eukaryota
TRSP4959.t1	Tricho_longreads_scf.00062_284551	protein kinase domain containing protein	1377	1.32531e-62	Acanthamoeba castellanii str. Neff	1257118	Eukaryota
TRSP19372.t1	Tricho_longreads_scf.00024_484723	protein kinase domain containing protein	530	6.1952e-55	Acanthamoeba castellanii str. Neff	1257118	Eukaryota
TRSP23426.t1	Tricho_longreads_scf.00277_52669	BTB/POZ domain containing protein	77	5.88411e-07	Acanthamoeba castellanii str. Neff	1257118	Eukaryota
TRSP43168.t1	Tricho_longreads_scf.00686_23935	BTB/POZ domain containing protein	256	2.28795e-09	Acanthamoeba castellanii str. Neff	1257118	Eukaryota
TRSP30782.t1	Tricho_longreads_scf.00056_299362	glutamine-tRNA ligase	713	0	Acanthamoeba castellanii str. Neff	1257118	Eukaryota
TRSP34350.t1	Tricho_longreads_scf.00019_512507	transcriptional regulator, Sir2 family protein	389	2.01479e-74	Acanthamoeba castellanii str. Neff	1257118	Eukaryota
TRSP2701.t1	Tricho_longreads_scf.00167_138674	haloacid dehalogenase (HAD) superfamily protein	873	1.12582e-43	Acanthamoeba castellanii str. Neff	1257118	Eukaryota
TRSP33734.t1	Tricho_longreads_scf.00221_85164	protein kinase domain containing protein	946	1.3508e-129	Acanthamoeba castellanii str. Neff	1257118	Eukaryota
TRSP10764.t1	Tricho_longreads_scf.00128_177280	protein kinase domain containing protein	811	3.01113e-132	Acanthamoeba castellanii str. Neff	1257118	Eukaryota
TRSP34239.t1	Tricho_longreads_scf.00019_512507	phosphoesterase family protein	489	5.67993e-126	Acanthamoeba castellanii str. Neff	1257118	Eukaryota
TRSP13476.t1	Tricho_longreads_scf.00010_779600	RNA ligase	358	1.54943e-88	Acanthamoeba castellanii str. Neff	1257118	Eukaryota
TRSP19083.t1	Tricho_longreads_scf.00212_91274	stressinducible protein STI1-like, putative	255	2.38919e-58	Acanthamoeba castellanii str. Neff	1257118	Eukaryota
TRSP23710.t1	Tricho_longreads_scf.00006_856200	Sec23/Sec24 trunk domain containing protein	746	1.39758e-123	Acanthamoeba castellanii str. Neff	1257118	Eukaryota
TRSP2621.t1	Tricho_longreads_scf.00095_228964	protein kinase domain containing protein	759	6.57131e-73	Acanthamoeba castellanii str. Neff	1257118	Eukaryota
TRSP39315.t1	Tricho_longreads_scf.00018_567815	Ser/Thr phosphatase family protein	611	1.69286e-158	Acanthamoeba castellanii str. Neff	1257118	Eukaryota
TRSP31253.t1	Tricho_longreads_scf.00687_23921	peroxidase, putative	185	1.78357e-46	Acanthamoeba castellanii str. Neff	1257118	Eukaryota
TRSP17449.t1	Tricho_longreads_scf.00069_270160	cytochrome p450 superfamily protein	503	3.73504e-118	Acanthamoeba castellanii str. Neff	1257118	Eukaryota
TRSP10091.t1	Tricho_longreads_scf.00042_341914	von Willebrand factor type A domain containing protein	755	0	Acanthamoeba castellanii str. Neff	1257118	Eukaryota
TRSP3879.t1	Tricho_longreads_scf.00134_167559	cytochrome p450 superfamily protein	499	4.07352e-110	Acanthamoeba castellanii str. Neff	1257118	Eukaryota
TRSP33551.t1	Tricho_longreads_scf.00020_510754	EF hand domain containing protein	553	4.82338e-97	Acanthamoeba castellanii str. Neff	1257118	Eukaryota
TRSP10168.t1	Tricho_longreads_scf.00042_341914	protein kinase domain containing protein	559	6.46816e-66	Acanthamoeba castellanii str. Neff	1257118	Eukaryota
TRSP33589.t1	Tricho_longreads_scf.00020_510754	chain a, 4ank: a designed ankyrin repeat protein	287	3.92458e-29	Acanthamoeba castellanii str. Neff	1257118	Eukaryota
TRSP17114.t1	Tricho_longreads_scf.00002_1182365	cystatin, putative	114	1.1177e-20	Acanthamoeba castellanii str. Neff	1257118	Eukaryota
TRSP21280.t1	Tricho_longreads_scf.00028_441143	SAM domain (Sterile alpha motif) domain containing protein	420	3.43217e-43	Acanthamoeba castellanii str. Neff	1257118	Eukaryota
TRSP478.t1	Tricho_longreads_scf.00347_38573	phospholipase a2, putative	655	4.52314e-48	Acanthamoeba castellanii str. Neff	1257118	Eukaryota
TRSP16871.t1	Tricho_longreads_scf.00002_1182365	hypothetical protein ACA1_384020	114	0.000426538	Acanthamoeba castellanii str. Neff	1257118	Eukaryota
TRSP7532.t1	Tricho_longreads_scf.00016_607116	dual specificity protein kinase shka, putative	547	7.37789e-144	Acanthamoeba castellanii str. Neff	1257118	Eukaryota
TRSP20261.t1	Tricho_longreads_scf.00260_58246	ABC transporter, ATPbinding domain containing protein	765	1.62938e-109	Acanthamoeba castellanii str. Neff	1257118	Eukaryota
TRSP30575.t1	Tricho_longreads_scf.00102_215809	phorbol esters/diacylglycerol binding domain containing protein	1755	1.67451e-75	Acanthamoeba castellanii str. Neff	1257118	Eukaryota
TRSP12100.t1	Tricho_longreads_scf.00156_147190	ATPase, AAA domain containing protein	711	5.1087e-160	Acanthamoeba castellanii str. Neff	1257118	Eukaryota
TRSP31894.t1	Tricho_longreads_scf.00190_114270	Lsorbosone dehydrogenase	460	5.57421e-116	Acanthamoeba castellanii str. Neff	1257118	Eukaryota
TRSP14707.t1	Tricho_longreads_scf.00107_209387	homeobox domain containing protein	298	9.91967e-38	Acanthamoeba castellanii str. Neff	1257118	Eukaryota
TRSP8617.t1	Tricho_longreads_scf.00074_266971	ribosomal protein L9, Nterminal domain containing protein	196	2.68599e-21	Acanthamoeba castellanii str. Neff	1257118	Eukaryota
TRSP36736.t1	Tricho_longreads_scf.00021_507094	OTUlike cysteine protease protein	660	2.43129e-46	Acanthamoeba castellanii str. Neff	1257118	Eukaryota
TRSP28716.t1	Tricho_longreads_scf.00120_192732	pyruvate kinase, barrel domain containing protein	539	2.4823e-106	Acanthamoeba castellanii str. Neff	1257118	Eukaryota
TRSP21252.t1	Tricho_longreads_scf.00028_441143	transcription factor e2f domain containing protein	588	1.42218e-41	Acanthamoeba castellanii str. Neff	1257118	Eukaryota
TRSP13771.t1	Tricho_longreads_scf.00034_409289	tetratricopeptide repeat domain containing protein	1408	0	Acanthamoeba castellanii str. Neff	1257118	Eukaryota
TRSP24722.t1	Tricho_longreads_scf.00008_824997	hydrolase, alpha/beta fold domain containing protein	334	1.58604e-86	Acanthamoeba castellanii str. Neff	1257118	Eukaryota
TRSP16978.t1	Tricho_longreads_scf.00002_1182365	RhoGEF domain containing protein	917	1.02026e-36	Acanthamoeba castellanii str. Neff	1257118	Eukaryota
TRSP20108.t1	Tricho_longreads_scf.00079_261360	importin beta subunit	858	0	Acanthamoeba castellanii str. Neff	1257118	Eukaryota
TRSP20004.t1	Tricho_longreads_scf.00231_75146	hypothetical protein ACA1_255670	418	5.90058e-110	Acanthamoeba castellanii str. Neff	1257118	Eukaryota
TRSP18601.t1	Tricho_longreads_scf.00060_288263	protein serine/threonine kinase, putative	821	2.72203e-62	Acanthamoeba castellanii str. Neff	1257118	Eukaryota
TRSP13078.t1	Tricho_longreads_scf.00148_154705	membrane transporter, putative	449	1.74549e-80	Acanthamoeba castellanii str. Neff	1257118	Eukaryota
TRSP25434.t1	Tricho_longreads_scf.00159_146039	phospholipidtranslocating P-type ATPase family protein	1069	0	Acanthamoeba castellanii str. Neff	1257118	Eukaryota
TRSP40408.t1	Tricho_longreads_scf.00031_423553	hypothetical protein ACA1_219480	965	0	Acanthamoeba castellanii str. Neff	1257118	Eukaryota
TRSP20713.t1	Tricho_longreads_scf.00026_458223	Proteintyrosine phosphatase	437	1.77904e-53	Acanthamoeba castellanii str. Neff	1257118	Eukaryota
TRSP15792.t1	Tricho_longreads_scf.00013_658143	DNA repair helicase rad25 subfamily protein	1173	1.65844e-130	Acanthamoeba castellanii str. Neff	1257118	Eukaryota
TRSP7770.t1	Tricho_longreads_scf.00097_222757	TolAlike protein	337	2.41584e-66	Acanthamoeba castellanii str. Neff	1257118	Eukaryota
TRSP19299.t1	Tricho_longreads_scf.00024_484723	protein kinase domain containing protein	474	1.38742e-109	Acanthamoeba castellanii str. Neff	1257118	Eukaryota
TRSP33511.t1	Tricho_longreads_scf.00020_510754	hypothetical protein ACA1_283270	199	3.98464e-06	Acanthamoeba castellanii str. Neff	1257118	Eukaryota
TRSP42602.t1	Tricho_longreads_scf.00014_642678	NACHT domain containing protein	1489	0	Acanthamoeba castellanii str. Neff	1257118	Eukaryota
TRSP29985.t1	Tricho_longreads_scf.00670_24213	TBC domaincontaining protein	633	5.79266e-58	Acanthamoeba castellanii str. Neff	1257118	Eukaryota
TRSP43999.t1	Tricho_longreads_scf.00009_791302	TBC domaincontaining protein	655	1.0687e-57	Acanthamoeba castellanii str. Neff	1257118	Eukaryota
TRSP30785.t1	Tricho_longreads_scf.00056_299362	DEAD/DEAH box helicase	1440	8.01812e-111	Acanthamoeba castellanii str. Neff	1257118	Eukaryota
TRSP23161.t1	Tricho_longreads_scf.00064_276406	nicotinamide-nucleotide adenylyltransferase/ nicotinate-nucleotide adenylyltransferase, putative	283	2.55241e-05	Acanthamoeba castellanii str. Neff	1257118	Eukaryota
TRSP20717.t1	Tricho_longreads_scf.00026_458223	hypothetical protein ACA1_130990	287	3.20972e-43	Acanthamoeba castellanii str. Neff	1257118	Eukaryota
TRSP43760.t1	Tricho_longreads_scf.00593_26313	cholinesterase	532	7.18394e-147	Acanthamoeba castellanii str. Neff	1257118	Eukaryota
TRSP18212.t1	Tricho_longreads_scf.00032_419434	homeobox domain containing protein	212	6.47107e-10	Acanthamoeba castellanii str. Neff	1257118	Eukaryota
TRSP16757.t1	Tricho_longreads_scf.00012_738869	cathepsin L, putative	320	1.04686e-90	Acanthamoeba castellanii str. Neff	1257118	Eukaryota
TRSP45240.t1	Tricho_longreads_scf.00053_308123	hypothetical protein ACA1_330330	135	2.24342e-21	Acanthamoeba castellanii str. Neff	1257118	Eukaryota
TRSP7209.t1	Tricho_longreads_scf.00285_49592	opioid growth factor receptor (ogfr) region protein, putative	256	6.68638e-54	Acanthamoeba castellanii str. Neff	1257118	Eukaryota
TRSP16953.t1	Tricho_longreads_scf.00002_1182365	GDSLlike lipase/acylhydrolase domain containing protein	353	2.67519e-92	Acanthamoeba castellanii str. Neff	1257118	Eukaryota
TRSP31684.t1	Tricho_longreads_scf.00100_218392	myosin head (motor domain) domain containing protein	1912	0	Acanthamoeba castellanii str. Neff	1257118	Eukaryota
TRSP35930.t1	Tricho_longreads_scf.00170_137981	EF hand domain containing protein	189	5.65482e-38	Acanthamoeba castellanii str. Neff	1257118	Eukaryota
TRSP45112.t1	Tricho_longreads_scf.00165_142107	cholinesterase	532	5.0772e-147	Acanthamoeba castellanii str. Neff	1257118	Eukaryota
TRSP31727.t1	Tricho_longreads_scf.00100_218392	NAD dependent epimerase/dehydratase family protein	323	9.81325e-72	Acanthamoeba castellanii str. Neff	1257118	Eukaryota
TRSP33554.t1	Tricho_longreads_scf.00020_510754	peptidase, M20/M25/M40 superfamily protein	390	1.18939e-116	Acanthamoeba castellanii str. Neff	1257118	Eukaryota
TRSP35910.t1	Tricho_longreads_scf.00170_137981	WD repeatcontaining protein	566	3.14358e-86	Acanthamoeba castellanii str. Neff	1257118	Eukaryota
TRSP45248.t1	Tricho_longreads_scf.00053_308123	NAD dependent epimerase/dehydratase superfamily protein	324	2.14584e-77	Acanthamoeba castellanii str. Neff	1257118	Eukaryota
TRSP33723.t1	Tricho_longreads_scf.00202_103780	BTB/POZ domain containing protein	630	4.26372e-102	Acanthamoeba castellanii str. Neff	1257118	Eukaryota
TRSP24802.t1	Tricho_longreads_scf.00008_824997	aldehyde oxidase and xanthine dehydrogenase, molybdopterin binding domain containing protein	1351	0	Acanthamoeba castellanii str. Neff	1257118	Eukaryota
TRSP18446.t1	Tricho_longreads_scf.00029_440001	transcriptional regulator, Sir2, putative	526	6.28489e-61	Acanthamoeba castellanii str. Neff	1257118	Eukaryota
TRSP12941.t1	Tricho_longreads_scf.00055_302167	lipase A precursor family protein	382	4.42483e-100	Acanthamoeba castellanii str. Neff	1257118	Eukaryota
TRSP14464.t1	Tricho_longreads_scf.00292_47208	nucleoside diphosphate kinase	446	4.62504e-104	Acanthamoeba castellanii str. Neff	1257118	Eukaryota
TRSP22503.t1	Tricho_longreads_scf.00187_116187	nucleoside diphosphate kinase	446	4.62504e-104	Acanthamoeba castellanii str. Neff	1257118	Eukaryota
TRSP16141.t1	Tricho_longreads_scf.00003_1004824	peroxisomal membrane 22 kDa family protein	195	5.73467e-38	Acanthamoeba castellanii str. Neff	1257118	Eukaryota
TRSP18655.t1	Tricho_longreads_scf.00015_607500	RasGEF domain containing protein	624	6.67687e-96	Acanthamoeba castellanii str. Neff	1257118	Eukaryota
TRSP10577.t1	Tricho_longreads_scf.00149_154273	Fatty acid desaturase, putative	461	5.27137e-126	Acanthamoeba castellanii str. Neff	1257118	Eukaryota
TRSP6233.t1	Tricho_longreads_scf.00073_267302	translocase, putative	465	3.0558e-79	Acanthamoeba castellanii str. Neff	1257118	Eukaryota
TRSP11092.t1	Tricho_longreads_scf.00059_288384	vacuolar fusion protein ccz1 family protein	399	2.68375e-112	Acanthamoeba castellanii str. Neff	1257118	Eukaryota
TRSP32904.t1	Tricho_longreads_scf.00025_477026	TolAlike protein	308	1.37454e-66	Acanthamoeba castellanii str. Neff	1257118	Eukaryota
TRSP39280.t1	Tricho_longreads_scf.00018_567815	Sec1like family protein	664	5.50562e-154	Acanthamoeba castellanii str. Neff	1257118	Eukaryota
TRSP1677.t1	Tricho_longreads_scf.00164_142938	C2 and SH3 domain containing protein	316	1.76334e-16	Acanthamoeba castellanii str. Neff	1257118	Eukaryota
TRSP22410.t1	Tricho_longreads_scf.00104_213812	ankyrin domain protein	136	3.45348e-20	Acanthamoeba castellanii str. Neff	1257118	Eukaryota
TRSP10468.t1	Tricho_longreads_scf.00138_164325	nicotinamide-nucleotide adenylyltransferase/ nicotinate-nucleotide adenylyltransferase, putative	314	1.54188e-31	Acanthamoeba castellanii str. Neff	1257118	Eukaryota
TRSP26197.t1	Tricho_longreads_scf.00047_322559	zinc finger, C3HC4 type (RING finger) domain containing protein	398	1.79213e-99	Acanthamoeba castellanii str. Neff	1257118	Eukaryota
TRSP24977.t1	Tricho_longreads_scf.00008_824997	zinc finger, C3HC4 type (RING finger) domain containing protein	398	1.79213e-99	Acanthamoeba castellanii str. Neff	1257118	Eukaryota
TRSP23794.t1	Tricho_longreads_scf.00006_856200	CRAL/TRIO domain containing protein	294	6.50672e-44	Acanthamoeba castellanii str. Neff	1257118	Eukaryota
TRSP31950.t1	Tricho_longreads_scf.00141_160753	SAM domain (Sterile alpha motif) domain containing protein	513	5.91643e-100	Acanthamoeba castellanii str. Neff	1257118	Eukaryota
TRSP26805.t1	Tricho_longreads_scf.00048_319196	tetratricopeptide repeat domain containing protein	1563	0	Acanthamoeba castellanii str. Neff	1257118	Eukaryota
TRSP23114.t1	Tricho_longreads_scf.00197_110896	TolAlike protein	310	1.39141e-66	Acanthamoeba castellanii str. Neff	1257118	Eukaryota
TRSP30732.t1	Tricho_longreads_scf.00056_299362	G proteincoupled receptor, putative	387	4.04627e-95	Acanthamoeba castellanii str. Neff	1257118	Eukaryota
TRSP10358.t1	Tricho_longreads_scf.00033_419090	serine/threonine kinase	421	7.20557e-56	Acanthamoeba castellanii str. Neff	1257118	Eukaryota
TRSP44364.t1	Tricho_longreads_scf.00011_772879	Calciumbinding mitochondrial carrier protein	761	0	Acanthamoeba castellanii str. Neff	1257118	Eukaryota
TRSP24688.t1	Tricho_longreads_scf.00008_824997	betahydroxylase	228	1.60558e-46	Acanthamoeba castellanii str. Neff	1257118	Eukaryota
TRSP29673.t1	Tricho_longreads_scf.00118_195945	AMP deaminase	1682	0	Acanthamoeba castellanii str. Neff	1257118	Eukaryota
TRSP23104.t1	Tricho_longreads_scf.00197_110896	lipase A precursor family protein	390	5.43797e-104	Acanthamoeba castellanii str. Neff	1257118	Eukaryota
TRSP10698.t1	Tricho_longreads_scf.00078_262981	carboxypeptidase A3, putative	364	1.91871e-99	Acanthamoeba castellanii str. Neff	1257118	Eukaryota
TRSP6309.t1	Tricho_longreads_scf.00073_267302	CCAAT/enhancer-binding family protein	247	1.60463e-16	Acanthamoeba castellanii str. Neff	1257118	Eukaryota
TRSP12002.t1	Tricho_longreads_scf.00067_272662	Olinked GlcNAc transferase-like protein	287	2.62894e-56	Acanthamoeba castellanii str. Neff	1257118	Eukaryota
TRSP29476.t1	Tricho_longreads_scf.00038_359085	Hsp40, putative	499	6.63793e-106	Acanthamoeba castellanii str. Neff	1257118	Eukaryota
TRSP44780.t1	Tricho_longreads_scf.00174_133189	peroxidase, putative	330	2.51252e-79	Acanthamoeba castellanii str. Neff	1257118	Eukaryota
TRSP1694.t1	Tricho_longreads_scf.00164_142938	alpha1,2-mannosidase subfamily protein	146	3.3255e-14	Acanthamoeba castellanii str. Neff	1257118	Eukaryota
TRSP20681.t1	Tricho_longreads_scf.00122_191827	hypothetical protein ACA1_119250	67	1.63373e-08	Acanthamoeba castellanii str. Neff	1257118	Eukaryota
TRSP5001.t1	Tricho_longreads_scf.00062_284551	hypothetical protein ACA1_119250	70	2.0882e-05	Acanthamoeba castellanii str. Neff	1257118	Eukaryota
TRSP31907.t1	Tricho_longreads_scf.00190_114270	transporter, major facilitator subfamily protein	473	3.58888e-73	Acanthamoeba castellanii str. Neff	1257118	Eukaryota
TRSP4639.t1	Tricho_longreads_scf.00452_30760	phospholipidtranslocating P-type ATPase family protein	1065	0	Acanthamoeba castellanii str. Neff	1257118	Eukaryota
TRSP33762.t1	Tricho_longreads_scf.00221_85164	DEAD/DEAH box helicase	1446	1.30683e-105	Acanthamoeba castellanii str. Neff	1257118	Eukaryota
TRSP30692.t1	Tricho_longreads_scf.00056_299362	START domain containing protein	206	1.02364e-36	Acanthamoeba castellanii str. Neff	1257118	Eukaryota
TRSP3513.t1	Tricho_longreads_scf.00007_838757	tetratricopeptide repeat domain containing protein	1343	0	Acanthamoeba castellanii str. Neff	1257118	Eukaryota
TRSP22970.t1	Tricho_longreads_scf.00061_286003	cytochrome p450 superfamily protein	100	3.36843e-13	Acanthamoeba castellanii str. Neff	1257118	Eukaryota
TRSP23841.t1	Tricho_longreads_scf.00105_211905	cyclin, Nterminal domain containing protein	348	2.26926e-47	Acanthamoeba castellanii str. Neff	1257118	Eukaryota
TRSP2026.t1	Tricho_longreads_scf.00229_76936	putative peptidoglycan binding domain containing protein	554	4.85111e-47	Acanthamoeba castellanii str. Neff	1257118	Eukaryota
TRSP9434.t1	Tricho_longreads_scf.00154_148902	hypothetical protein ACA1_307830	145	6.19666e-16	Acanthamoeba castellanii str. Neff	1257118	Eukaryota
TRSP32365.t1	Tricho_longreads_scf.00262_56927	Ubiquitinlike modifier-activating enzyme 1, putative	301	2.64305e-71	Acanthamoeba castellanii str. Neff	1257118	Eukaryota
TRSP21536.t1	Tricho_longreads_scf.00169_138509	hypothetical protein ACA1_285180	573	0.000349306	Acanthamoeba castellanii str. Neff	1257118	Eukaryota
TRSP12909.t1	Tricho_longreads_scf.00055_302167	hypothetical protein ACA1_255750	496	4.53451e-136	Acanthamoeba castellanii str. Neff	1257118	Eukaryota
TRSP10125.t1	Tricho_longreads_scf.00042_341914	GTPase-activator protein for Ras family GTPase	328	1.63866e-19	Acanthamoeba castellanii str. Neff	1257118	Eukaryota
TRSP16022.t1	Tricho_longreads_scf.00013_658143	hypothetical protein ACA1_088900	213	9.73751e-21	Acanthamoeba castellanii str. Neff	1257118	Eukaryota
TRSP44381.t1	Tricho_longreads_scf.00011_772879	LIM domain containing protein	300	4.81492e-17	Acanthamoeba castellanii str. Neff	1257118	Eukaryota
TRSP23774.t1	Tricho_longreads_scf.00006_856200	alanyl dipeptidyl peptidase	754	2.18774e-177	Acanthamoeba castellanii str. Neff	1257118	Eukaryota
TRSP23616.t1	Tricho_longreads_scf.00006_856200	hypothetical protein ACA1_369890	162	2.47222e-29	Acanthamoeba castellanii str. Neff	1257118	Eukaryota
TRSP14127.t1	Tricho_longreads_scf.00001_1255013	protein kinase domain containing protein	347	1.14502e-62	Acanthamoeba castellanii str. Neff	1257118	Eukaryota
TRSP23193.t1	Tricho_longreads_scf.00064_276406	Ubox domain containing protein	971	1.46374e-150	Acanthamoeba castellanii str. Neff	1257118	Eukaryota
TRSP2817.t1	Tricho_longreads_scf.00684_23967	NAD dependent epimerase/dehydratase family protein	817	3.14626e-55	Acanthamoeba castellanii str. Neff	1257118	Eukaryota
TRSP33692.t1	Tricho_longreads_scf.00202_103780	chromo' (CHRromatin Organization MOdifier) domain containing protein	603	2.20041e-14	Acanthamoeba castellanii str. Neff	1257118	Eukaryota
TRSP13132.t1	Tricho_longreads_scf.00114_200515	cholinesterase	468	2.51968e-123	Acanthamoeba castellanii str. Neff	1257118	Eukaryota
TRSP3760.t1	Tricho_longreads_scf.00007_838757	TolAlike protein	321	1.4806e-60	Acanthamoeba castellanii str. Neff	1257118	Eukaryota
TRSP12216.t1	Tricho_longreads_scf.00088_238416	DnaJ domain containing protein	408	1.19482e-64	Acanthamoeba castellanii str. Neff	1257118	Eukaryota
TRSP35169.t1	Tricho_longreads_scf.00708_23571	leucine rich repeat domain containing protein	278	2.13922e-45	Acanthamoeba castellanii str. Neff	1257118	Eukaryota
TRSP16371.t1	Tricho_longreads_scf.00003_1004824	leucine rich repeat domain containing protein	278	2.4833e-45	Acanthamoeba castellanii str. Neff	1257118	Eukaryota
TRSP13478.t1	Tricho_longreads_scf.00010_779600	hypothetical protein ACA1_215080	1715	1.69787e-78	Acanthamoeba castellanii str. Neff	1257118	Eukaryota
TRSP23578.t1	Tricho_longreads_scf.00006_856200	tetratricopeptide repeat domain containing protein	803	3.1657e-150	Acanthamoeba castellanii str. Neff	1257118	Eukaryota
TRSP19524.t1	Tricho_longreads_scf.00035_405242	DIL domain containing protein	743	1.4544e-20	Acanthamoeba castellanii str. Neff	1257118	Eukaryota
TRSP23027.t1	Tricho_longreads_scf.00061_286003	enoylCoA hydratase/isomerase family domain containing protein	300	2.19288e-87	Acanthamoeba castellanii str. Neff	1257118	Eukaryota
TRSP34340.t1	Tricho_longreads_scf.00019_512507	TolAlike protein	297	9.50026e-63	Acanthamoeba castellanii str. Neff	1257118	Eukaryota
TRSP13296.t1	Tricho_longreads_scf.00010_779600	UBA/TS-N domain containing protein	154	1.18255e-05	Acanthamoeba castellanii str. Neff	1257118	Eukaryota
TRSP22288.t1	Tricho_longreads_scf.00005_925709	poly(adpribose) glycohydrolase	598	9.81152e-82	Acanthamoeba castellanii str. Neff	1257118	Eukaryota
TRSP24920.t1	Tricho_longreads_scf.00008_824997	phospholipidtranslocating P-type ATPase, flippase subfamily protein	1128	0	Acanthamoeba castellanii str. Neff	1257118	Eukaryota
TRSP19665.t1	Tricho_longreads_scf.00035_405242	global transcription factor, putative	927	0	Acanthamoeba castellanii str. Neff	1257118	Eukaryota
TRSP27212.t1	Tricho_longreads_scf.01028_19190	alkaline phosphatase family subfamily protein	512	1.06427e-103	Acanthamoeba castellanii str. Neff	1257118	Eukaryota
TRSP7444.t1	Tricho_longreads_scf.00016_607116	alkaline phosphatase family subfamily protein	512	1.06427e-103	Acanthamoeba castellanii str. Neff	1257118	Eukaryota
TRSP23106.t1	Tricho_longreads_scf.00197_110896	NAD dependent epimerase/dehydratase family protein	327	1.07664e-67	Acanthamoeba castellanii str. Neff	1257118	Eukaryota
TRSP21606.t1	Tricho_longreads_scf.00150_153505	serine/threonine kinase	758	1.31421e-58	Acanthamoeba castellanii str. Neff	1257118	Eukaryota
TRSP42044.t1	Tricho_longreads_scf.00037_392589	succinylglutamate desuccinylase/aspartoacylase, putative	540	4.47351e-130	Acanthamoeba castellanii str. Neff	1257118	Eukaryota
TRSP31977.t1	Tricho_longreads_scf.00141_160753	DNA ligase III, putative	236	3.37508e-47	Acanthamoeba castellanii str. Neff	1257118	Eukaryota
TRSP18812.t1	Tricho_longreads_scf.00015_607500	TolAlike protein	339	1.37204e-63	Acanthamoeba castellanii str. Neff	1257118	Eukaryota
TRSP27259.t1	Tricho_longreads_scf.00052_310865	actinrelated protein Arp6, putative	425	1.32818e-94	Acanthamoeba castellanii str. Neff	1257118	Eukaryota
TRSP9907.t1	Tricho_longreads_scf.00004_931448	tetratricopeptide repeat domain containing protein	857	1.03909e-161	Acanthamoeba castellanii str. Neff	1257118	Eukaryota
TRSP12469.t1	Tricho_longreads_scf.00136_166881	protein tolA, putative	349	8.00991e-68	Acanthamoeba castellanii str. Neff	1257118	Eukaryota
TRSP23108.t1	Tricho_longreads_scf.00197_110896	phosphoesterase family protein	494	4.64939e-123	Acanthamoeba castellanii str. Neff	1257118	Eukaryota
TRSP21524.t1	Tricho_longreads_scf.00169_138509	PhytanoylCoA dioxygenase (PhyH) superfamily protein	363	8.82455e-79	Acanthamoeba castellanii str. Neff	1257118	Eukaryota
TRSP17842.t1	Tricho_longreads_scf.00046_325925	NOL1/NOP2/sun domain containing protein	369	2.45356e-105	Acanthamoeba castellanii str. Neff	1257118	Eukaryota
TRSP44491.t1	Tricho_longreads_scf.00011_772879	peroxidase, putative	330	2.94402e-80	Acanthamoeba castellanii str. Neff	1257118	Eukaryota
TRSP35124.t1	Tricho_longreads_scf.00092_230423	peroxisomal membrane 22 kDa family protein	192	1.16179e-47	Acanthamoeba castellanii str. Neff	1257118	Eukaryota
TRSP23633.t1	Tricho_longreads_scf.00006_856200	POT family protein	541	3.09767e-122	Acanthamoeba castellanii str. Neff	1257118	Eukaryota
TRSP17110.t1	Tricho_longreads_scf.00002_1182365	GDSLlike lipase/acylhydrolase domain containing protein	353	5.64156e-88	Acanthamoeba castellanii str. Neff	1257118	Eukaryota
TRSP7058.t1	Tricho_longreads_scf.00051_312876	EGFlike domain containing protein	674	1.16204e-73	Acanthamoeba castellanii str. Neff	1257118	Eukaryota
TRSP45072.t1	Tricho_longreads_scf.01248_16974	cytochrome p450 superfamily protein	498	1.72557e-111	Acanthamoeba castellanii str. Neff	1257118	Eukaryota
TRSP11117.t1	Tricho_longreads_scf.00238_71830	4'-phosphopantetheinyl transferase superfamily protein	280	1.32216e-55	Acanthamoeba castellanii str. Neff	1257118	Eukaryota
TRSP4896.t1	Tricho_longreads_scf.00062_284551	WD domain, G-beta repeat-containing protein	401	1.57865e-34	Acanthamoeba castellanii str. Neff	1257118	Eukaryota
TRSP28461.t1	Tricho_longreads_scf.00044_330626	ribosomal RNA large subunit methyltransferase J, putative	359	3.81427e-56	Acanthamoeba castellanii str. Neff	1257118	Eukaryota
TRSP26365.t1	Tricho_longreads_scf.00208_95545	von Willebrand factor type A domain containing protein	455	6.93121e-82	Acanthamoeba castellanii str. Neff	1257118	Eukaryota
TRSP18684.t1	Tricho_longreads_scf.00015_607500	integral membrane protein	343	1.39363e-52	Acanthamoeba castellanii str. Neff	1257118	Eukaryota
TRSP7812.t1	Tricho_longreads_scf.00676_24128	hypothetical protein ACA1_322130	424	1.36243e-119	Acanthamoeba castellanii str. Neff	1257118	Eukaryota
TRSP10539.t1	Tricho_longreads_scf.00149_154273	actin bundling protein	246	7.04515e-49	Acanthamoeba castellanii str. Neff	1257118	Eukaryota
TRSP10551.t1	Tricho_longreads_scf.00149_154273	actin bundling protein	246	7.04515e-49	Acanthamoeba castellanii str. Neff	1257118	Eukaryota
TRSP18029.t1	Tricho_longreads_scf.00193_113068	Sec23/Sec24 trunk domain containing protein	982	2.17527e-113	Acanthamoeba castellanii str. Neff	1257118	Eukaryota
TRSP28715.t1	Tricho_longreads_scf.00120_192732	Sphingosine1-phosphate lyase, putative	526	7.86323e-120	Acanthamoeba castellanii str. Neff	1257118	Eukaryota
TRSP7321.t1	Tricho_longreads_scf.00191_113692	protein kinase domain containing protein	832	5.28621e-49	Acanthamoeba castellanii str. Neff	1257118	Eukaryota
TRSP25683.t1	Tricho_longreads_scf.00210_95007	cytochrome p450 superfamily protein	484	3.02149e-110	Acanthamoeba castellanii str. Neff	1257118	Eukaryota
TRSP12402.t1	Tricho_longreads_scf.00119_194326	zinc finger family protein	1357	1.62843e-103	Acanthamoeba castellanii str. Neff	1257118	Eukaryota
TRSP27047.t1	Tricho_longreads_scf.00127_179609	von Willebrand factor type A domain containing protein	453	8.77211e-82	Acanthamoeba castellanii str. Neff	1257118	Eukaryota
TRSP19095.t1	Tricho_longreads_scf.00212_91274	Sec23/Sec24 trunk domain containing protein	813	0	Acanthamoeba castellanii str. Neff	1257118	Eukaryota
TRSP2571.t1	Tricho_longreads_scf.00095_228964	hypothetical protein ACA1_113470	1221	2.80593e-110	Acanthamoeba castellanii str. Neff	1257118	Eukaryota
TRSP24158.t1	Tricho_longreads_scf.00560_26948	RasGEF domain containing protein	105	2.47825e-11	Acanthamoeba castellanii str. Neff	1257118	Eukaryota
TRSP6754.t1	Tricho_longreads_scf.01190_17471	protein tolA, putative	355	5.46727e-67	Acanthamoeba castellanii str. Neff	1257118	Eukaryota
TRSP13666.t1	Tricho_longreads_scf.00034_409289	RasGEF domain containing protein	347	3.19732e-60	Acanthamoeba castellanii str. Neff	1257118	Eukaryota
TRSP8652.t1	Tricho_longreads_scf.00074_266971	Glycoprotein, synaptic 2 family protein	291	1.29174e-67	Acanthamoeba castellanii str. Neff	1257118	Eukaryota
TRSP32003.t1	Tricho_longreads_scf.00141_160753	Dual specificity protein kinase	525	8.93741e-123	Acanthamoeba castellanii str. Neff	1257118	Eukaryota
TRSP4923.t1	Tricho_longreads_scf.00062_284551	von Willebrand factor type A domain containing protein	456	9.24711e-85	Acanthamoeba castellanii str. Neff	1257118	Eukaryota
TRSP23136.t1	Tricho_longreads_scf.00197_110896	hypothetical protein ACA1_175330	1694	0	Acanthamoeba castellanii str. Neff	1257118	Eukaryota
TRSP14408.t1	Tricho_longreads_scf.00001_1255013	hypothetical protein ACA1_058720	193	1.11235e-42	Acanthamoeba castellanii str. Neff	1257118	Eukaryota
TRSP24504.t1	Tricho_longreads_scf.00065_273929	NOL1/NOP2/sun family domain containing protein	574	5.21198e-96	Acanthamoeba castellanii str. Neff	1257118	Eukaryota
TRSP29429.t1	Tricho_longreads_scf.00487_29322	von Willebrand factor type A domain containing protein	453	7.02198e-82	Acanthamoeba castellanii str. Neff	1257118	Eukaryota
TRSP1124.t1	Tricho_longreads_scf.00086_252263	protein tolA, putative	392	4.42585e-65	Acanthamoeba castellanii str. Neff	1257118	Eukaryota
TRSP45278.t1	Tricho_longreads_scf.00053_308123	Fbox domain containing protein	480	7.25034e-89	Acanthamoeba castellanii str. Neff	1257118	Eukaryota
TRSP18315.t1	Tricho_longreads_scf.00029_440001	Nacyl phosphatidylethanolamine phospholipase D	343	3.51412e-104	Acanthamoeba castellanii str. Neff	1257118	Eukaryota
TRSP12242.t1	Tricho_longreads_scf.00088_238416	transporter, major facilitator family protein	459	7.41979e-86	Acanthamoeba castellanii str. Neff	1257118	Eukaryota
TRSP22008.t1	Tricho_longreads_scf.00005_925709	von Willebrand factor type A domain containing protein	456	9.7329e-86	Acanthamoeba castellanii str. Neff	1257118	Eukaryota
TRSP15697.t1	Tricho_longreads_scf.00040_356269	betaxylosidase	787	3.75277e-179	Acanthamoeba castellanii str. Neff	1257118	Eukaryota
TRSP26299.t1	Tricho_longreads_scf.00047_322559	myosin head (motor domain) domain containing protein	1431	0	Acanthamoeba castellanii str. Neff	1257118	Eukaryota
TRSP22449.t1	Tricho_longreads_scf.00188_116124	Pex2 / Pex12 amino terminal regioncontaining protein	302	1.14761e-73	Acanthamoeba castellanii str. Neff	1257118	Eukaryota
TRSP18386.t1	Tricho_longreads_scf.00029_440001	DNAdirected RNA polymerase II subunit rpb4, putative	132	3.78071e-28	Acanthamoeba castellanii str. Neff	1257118	Eukaryota
TRSP30480.t1	Tricho_longreads_scf.00068_270245	CRAL/TRIO domain containing protein	252	5.83809e-43	Acanthamoeba castellanii str. Neff	1257118	Eukaryota
TRSP25756.t1	Tricho_longreads_scf.00017_602044	CRAL/TRIO domain containing protein	253	4.97938e-45	Acanthamoeba castellanii str. Neff	1257118	Eukaryota
TRSP28165.t1	Tricho_longreads_scf.00089_236149	hypothetical protein ACA1_113470	1154	9.93279e-116	Acanthamoeba castellanii str. Neff	1257118	Eukaryota
TRSP39028.t1	Tricho_longreads_scf.00075_266310	regulator of chromosome condensation (RCC1) repeat domain containing protein	1191	0	Acanthamoeba castellanii str. Neff	1257118	Eukaryota
TRSP12533.t1	Tricho_longreads_scf.00124_185874	clavaldehyde dehydrogenase	247	1.48968e-56	Acanthamoeba castellanii str. Neff	1257118	Eukaryota
TRSP42524.t1	Tricho_longreads_scf.00014_642678	RhoGEF domain containing protein	436	2.26782e-86	Acanthamoeba castellanii str. Neff	1257118	Eukaryota
TRSP8152.t1	Tricho_longreads_scf.00131_172796	prenylcysteine oxidase	442	2.37072e-84	Acanthamoeba castellanii str. Neff	1257118	Eukaryota
TRSP27938.t1	Tricho_longreads_scf.00043_341295	SAM domain (Sterile alpha motif) domain containing protein	342	1.32922e-41	Acanthamoeba castellanii str. Neff	1257118	Eukaryota
TRSP10132.t1	Tricho_longreads_scf.00042_341914	hypothetical protein ACA1_131210	497	1.53309e-60	Acanthamoeba castellanii str. Neff	1257118	Eukaryota
TRSP31898.t1	Tricho_longreads_scf.00190_114270	viral life cyclerelated protein	702	1.10355e-129	Acanthamoeba castellanii str. Neff	1257118	Eukaryota
TRSP27495.t1	Tricho_longreads_scf.00076_264950	ARM family protein	1099	0	Acanthamoeba castellanii str. Neff	1257118	Eukaryota
TRSP24432.t1	Tricho_longreads_scf.00137_165529	phospholipidtranslocating P-type ATPase family protein	1197	0	Acanthamoeba castellanii str. Neff	1257118	Eukaryota
TRSP24494.t1	Tricho_longreads_scf.00065_273929	NOL1/NOP2/sun family domain containing protein	577	3.05131e-96	Acanthamoeba castellanii str. Neff	1257118	Eukaryota
TRSP35750.t1	Tricho_longreads_scf.00139_163662	phosphoribosylaminoimidazole carboxylase, ATPase subunit	794	3.5847e-162	Acanthamoeba castellanii str. Neff	1257118	Eukaryota
TRSP24842.t1	Tricho_longreads_scf.00008_824997	aldehyde oxidase and xanthine dehydrogenase, molybdopterin binding domain containing protein	2057	0	Acanthamoeba castellanii str. Neff	1257118	Eukaryota
TRSP30159.t1	Tricho_longreads_scf.00082_257650	MORN repeatcontaining protein	405	1.93809e-09	Acanthamoeba castellanii str. Neff	1257118	Eukaryota
TRSP10834.t1	Tricho_longreads_scf.00128_177280	RapGAP/RanGAP domain containing protein	540	1.36962e-53	Acanthamoeba castellanii str. Neff	1257118	Eukaryota
TRSP7100.t1	Tricho_longreads_scf.00051_312876	cudAlike protein, putative	266	1.73088e-18	Acanthamoeba castellanii str. Neff	1257118	Eukaryota
TRSP36683.t1	Tricho_longreads_scf.00021_507094	AAR2 protein	356	6.7265e-75	Acanthamoeba castellanii str. Neff	1257118	Eukaryota
TRSP33818.t1	Tricho_longreads_scf.00318_42762	MORN repeatcontaining protein	205	1.14688e-19	Acanthamoeba castellanii str. Neff	1257118	Eukaryota
TRSP26121.t1	Tricho_longreads_scf.00036_403022	MORN repeatcontaining protein	205	1.14688e-19	Acanthamoeba castellanii str. Neff	1257118	Eukaryota
TRSP23760.t1	Tricho_longreads_scf.00006_856200	hypothetical protein ACA1_369320	919	0	Acanthamoeba castellanii str. Neff	1257118	Eukaryota
TRSP16002.t1	Tricho_longreads_scf.00013_658143	nicotinamide-nucleotide adenylyltransferase/ nicotinate-nucleotide adenylyltransferase, putative	295	1.23507e-28	Acanthamoeba castellanii str. Neff	1257118	Eukaryota
TRSP42718.t1	Tricho_longreads_scf.00096_227714	TolAlike protein	319	1.07539e-59	Acanthamoeba castellanii str. Neff	1257118	Eukaryota
TRSP19848.t1	Tricho_longreads_scf.00085_255005	glycosyl hydrolases family 38 Nterminal domain containing protein	1156	0	Acanthamoeba castellanii str. Neff	1257118	Eukaryota
TRSP10061.t1	Tricho_longreads_scf.00004_931448	cathepsin A, putative	737	2.49005e-107	Acanthamoeba castellanii str. Neff	1257118	Eukaryota
TRSP11715.t1	Tricho_longreads_scf.00224_82319	endonuclease/exonuclease/phosphatase family protein	349	1.16573e-59	Acanthamoeba castellanii str. Neff	1257118	Eukaryota
TRSP11868.t1	Tricho_longreads_scf.00090_235661	protein kinase domain containing protein	862	1.00047e-41	Acanthamoeba castellanii str. Neff	1257118	Eukaryota
TRSP15834.t1	Tricho_longreads_scf.00013_658143	Phosphate transporter family protein	469	8.6294e-106	Acanthamoeba castellanii str. Neff	1257118	Eukaryota
TRSP31990.t1	Tricho_longreads_scf.00141_160753	RhoGEF domain containing protein	1055	2.72332e-62	Acanthamoeba castellanii str. Neff	1257118	Eukaryota
TRSP17298.t1	Tricho_longreads_scf.00002_1182365	SNF2 family Nterminal domain containing protein	1575	0	Acanthamoeba castellanii str. Neff	1257118	Eukaryota
TRSP21928.t1	Tricho_longreads_scf.00412_33092	myosin head (motor domain) domain containing protein	1391	0	Acanthamoeba castellanii str. Neff	1257118	Eukaryota
TRSP27308.t1	Tricho_longreads_scf.00052_310865	protein tolA, putative	391	6.52805e-60	Acanthamoeba castellanii str. Neff	1257118	Eukaryota
TRSP15852.t1	Tricho_longreads_scf.00013_658143	transcription factor e2f/dimerization partner (tdp) domain containing protein	433	2.59303e-65	Acanthamoeba castellanii str. Neff	1257118	Eukaryota
TRSP39347.t1	Tricho_longreads_scf.00018_567815	hypothetical protein ACA1_042090	204	8.6925e-33	Acanthamoeba castellanii str. Neff	1257118	Eukaryota
TRSP40427.t1	Tricho_longreads_scf.00031_423553	actinfragmin kinase	1065	2.7962e-57	Acanthamoeba castellanii str. Neff	1257118	Eukaryota
TRSP14405.t1	Tricho_longreads_scf.00001_1255013	hypothetical protein ACA1_155240	277	2.07925e-57	Acanthamoeba castellanii str. Neff	1257118	Eukaryota
TRSP40398.t1	Tricho_longreads_scf.00031_423553	thioredoxin, putative	803	1.61736e-44	Acanthamoeba castellanii str. Neff	1257118	Eukaryota
TRSP25804.t1	Tricho_longreads_scf.00017_602044	protein synthetase, putative	1907	0	Acanthamoeba castellanii str. Neff	1257118	Eukaryota
TRSP18563.t1	Tricho_longreads_scf.00060_288263	protein casp, putative	621	7.45844e-112	Acanthamoeba castellanii str. Neff	1257118	Eukaryota
TRSP33014.t1	Tricho_longreads_scf.00025_477026	protein kinase domain containing protein	791	4.68721e-47	Acanthamoeba castellanii str. Neff	1257118	Eukaryota
TRSP14763.t1	Tricho_longreads_scf.00107_209387	hypothetical protein ACA1_174560	420	2.68047e-64	Acanthamoeba castellanii str. Neff	1257118	Eukaryota
TRSP12160.t1	Tricho_longreads_scf.00156_147190	EF hand domain containing protein	366	4.68136e-69	Acanthamoeba castellanii str. Neff	1257118	Eukaryota
TRSP31711.t1	Tricho_longreads_scf.00100_218392	amidohydrolase domain containing protein	1144	0	Acanthamoeba castellanii str. Neff	1257118	Eukaryota
TRSP3249.t1	Tricho_longreads_scf.00217_88237	SAM domain (Sterile alpha motif) domain containing protein	449	9.29901e-68	Acanthamoeba castellanii str. Neff	1257118	Eukaryota
TRSP22357.t1	Tricho_longreads_scf.00104_213812	IgA Peptidase M64 protein	589	4.53055e-164	Acanthamoeba castellanii str. Neff	1257118	Eukaryota
TRSP22386.t1	Tricho_longreads_scf.00104_213812	IgA Peptidase M64 protein	589	9.36493e-164	Acanthamoeba castellanii str. Neff	1257118	Eukaryota
TRSP29846.t1	Tricho_longreads_scf.00143_159134	Bromodomain containing protein	239	5.91536e-41	Acanthamoeba castellanii str. Neff	1257118	Eukaryota
TRSP25193.t1	Tricho_longreads_scf.00098_222063	peroxidase, putative	348	1.38723e-75	Acanthamoeba castellanii str. Neff	1257118	Eukaryota
TRSP2633.t1	Tricho_longreads_scf.00095_228964	ribosome biogenesis GTPase YqeH, putative	408	9.59567e-81	Acanthamoeba castellanii str. Neff	1257118	Eukaryota
TRSP24727.t1	Tricho_longreads_scf.00008_824997	Fbox domain containing protein	997	0	Acanthamoeba castellanii str. Neff	1257118	Eukaryota
TRSP3719.t1	Tricho_longreads_scf.00007_838757	Gpatch domain containing protein	304	2.12423e-16	Acanthamoeba castellanii str. Neff	1257118	Eukaryota
TRSP16906.t1	Tricho_longreads_scf.00002_1182365	dual specificity phosphatase, catalytic domain containing protein	171	1.60544e-24	Acanthamoeba castellanii str. Neff	1257118	Eukaryota
TRSP26253.t1	Tricho_longreads_scf.00047_322559	HEAT repeat domain containing protein	1120	3.31813e-127	Acanthamoeba castellanii str. Neff	1257118	Eukaryota
TRSP26479.t1	Tricho_longreads_scf.00077_264455	protein pns1, putative	501	1.15801e-115	Acanthamoeba castellanii str. Neff	1257118	Eukaryota
TRSP41713.t1	Tricho_longreads_scf.00647_24825	hypothetical protein ACA1_113470	1333	1.73628e-105	Acanthamoeba castellanii str. Neff	1257118	Eukaryota
TRSP12437.t1	Tricho_longreads_scf.00136_166881	hypothetical protein ACA1_113470	1333	1.82503e-105	Acanthamoeba castellanii str. Neff	1257118	Eukaryota
TRSP9897.t1	Tricho_longreads_scf.00004_931448	hypothetical protein ACA1_269310	458	6.85456e-86	Acanthamoeba castellanii str. Neff	1257118	Eukaryota
TRSP39988.t1	Tricho_longreads_scf.00130_174597	IgA Peptidase M64 protein	588	7.40733e-163	Acanthamoeba castellanii str. Neff	1257118	Eukaryota
TRSP44057.t1	Tricho_longreads_scf.00009_791302	EF hand domain containing protein	547	2.59283e-57	Acanthamoeba castellanii str. Neff	1257118	Eukaryota
TRSP13510.t1	Tricho_longreads_scf.00054_306768	integral membrane protein duf6 domain containing protein	429	7.6258e-73	Acanthamoeba castellanii str. Neff	1257118	Eukaryota
TRSP4156.t1	Tricho_longreads_scf.00103_214222	poly ADP-ribose glycohydrolase (PARG) protein, putative	597	3.5155e-88	Acanthamoeba castellanii str. Neff	1257118	Eukaryota
TRSP7080.t1	Tricho_longreads_scf.00051_312876	hypothetical protein ACA1_382400	763	4.49028e-157	Acanthamoeba castellanii str. Neff	1257118	Eukaryota
TRSP16818.t1	Tricho_longreads_scf.00012_738869	START domain containing protein	246	2.65352e-38	Acanthamoeba castellanii str. Neff	1257118	Eukaryota
TRSP34281.t1	Tricho_longreads_scf.00019_512507	cytochrome p450 superfamily protein	430	2.54172e-96	Acanthamoeba castellanii str. Neff	1257118	Eukaryota
TRSP17100.t1	Tricho_longreads_scf.00002_1182365	peptidase, M20/M25/M40 superfamily protein	366	1.86193e-75	Acanthamoeba castellanii str. Neff	1257118	Eukaryota
TRSP41608.t1	Tricho_longreads_scf.00205_100626	hypothetical protein ACA1_010190, partial	1153	1.68972e-75	Acanthamoeba castellanii str. Neff	1257118	Eukaryota
TRSP6009.t1	Tricho_longreads_scf.00527_28046	von Willebrand factor type A domain containing protein	643	6.87794e-66	Acanthamoeba castellanii str. Neff	1257118	Eukaryota
TRSP42202.t1	Tricho_longreads_scf.00473_29768	protein tolA, putative	378	1.91705e-64	Acanthamoeba castellanii str. Neff	1257118	Eukaryota
TRSP25108.t1	Tricho_longreads_scf.00196_110900	hypothetical protein ACA1_103330	576	9.96186e-17	Acanthamoeba castellanii str. Neff	1257118	Eukaryota
TRSP45125.t1	Tricho_longreads_scf.00165_142107	protein tolA, putative	378	3.13812e-64	Acanthamoeba castellanii str. Neff	1257118	Eukaryota
TRSP32122.t1	Tricho_longreads_scf.00266_55260	rad50 subfamily protein	1317	0	Acanthamoeba castellanii str. Neff	1257118	Eukaryota
TRSP19993.t1	Tricho_longreads_scf.00231_75146	ubiquitin fusion degradation protein, putative	522	3.58551e-108	Acanthamoeba castellanii str. Neff	1257118	Eukaryota
TRSP40216.t1	Tricho_longreads_scf.00180_127864	cytochrome p450 superfamily protein	456	4.47855e-99	Acanthamoeba castellanii str. Neff	1257118	Eukaryota
TRSP8510.t1	Tricho_longreads_scf.00281_51443	von Willebrand factor type A domain containing protein	465	8.02971e-77	Acanthamoeba castellanii str. Neff	1257118	Eukaryota
TRSP14817.t1	Tricho_longreads_scf.00027_457298	carrier superfamily protein	487	4.02043e-116	Acanthamoeba castellanii str. Neff	1257118	Eukaryota
TRSP32589.t1	Tricho_longreads_scf.00101_216346	hypothetical protein ACA1_111720	325	7.4102e-19	Acanthamoeba castellanii str. Neff	1257118	Eukaryota
TRSP27258.t1	Tricho_longreads_scf.00052_310865	Ras guanine nucleotide exchange factor, putative	1226	2.6393e-64	Acanthamoeba castellanii str. Neff	1257118	Eukaryota
TRSP42085.t1	Tricho_longreads_scf.00037_392589	cytochrome p450 superfamily protein	483	1.29336e-106	Acanthamoeba castellanii str. Neff	1257118	Eukaryota
TRSP13433.t1	Tricho_longreads_scf.00010_779600	protein tolA, putative	420	4.97143e-64	Acanthamoeba castellanii str. Neff	1257118	Eukaryota
TRSP2346.t1	Tricho_longreads_scf.01232_17117	methyltransferase domain containing protein	222	1.59594e-35	Acanthamoeba castellanii str. Neff	1257118	Eukaryota
TRSP26326.t1	Tricho_longreads_scf.00047_322559	EF hand domain containing protein	464	1.06704e-47	Acanthamoeba castellanii str. Neff	1257118	Eukaryota
TRSP19286.t1	Tricho_longreads_scf.00024_484723	hypothetical protein ACA1_157820	151	6.91654e-10	Acanthamoeba castellanii str. Neff	1257118	Eukaryota
TRSP41964.t1	Tricho_longreads_scf.00037_392589	methyltransferase domain containing protein	224	1.99276e-36	Acanthamoeba castellanii str. Neff	1257118	Eukaryota
TRSP16338.t1	Tricho_longreads_scf.00003_1004824	nucleotidyltransferase domain containing protein	433	3.94429e-63	Acanthamoeba castellanii str. Neff	1257118	Eukaryota
TRSP8952.t1	Tricho_longreads_scf.00050_315752	hypothetical protein ACA1_215700	276	1.87797e-57	Acanthamoeba castellanii str. Neff	1257118	Eukaryota
TRSP33630.t1	Tricho_longreads_scf.00020_510754	ferredoxin, putative	282	4.0453e-33	Acanthamoeba castellanii str. Neff	1257118	Eukaryota
TRSP18040.t1	Tricho_longreads_scf.00193_113068	rieske [2fe2s] domain containing protein	458	2.06227e-94	Acanthamoeba castellanii str. Neff	1257118	Eukaryota
TRSP8959.t1	Tricho_longreads_scf.00050_315752	HEAT repeat domain containing protein	1555	2.71965e-49	Acanthamoeba castellanii str. Neff	1257118	Eukaryota
TRSP4114.t1	Tricho_longreads_scf.00103_214222	hypothetical protein ACA1_368190	168	1.33101e-27	Acanthamoeba castellanii str. Neff	1257118	Eukaryota
TRSP30807.t1	Tricho_longreads_scf.00113_200828	structural maintenance of chromosomes 5 smc5, putative	1045	0	Acanthamoeba castellanii str. Neff	1257118	Eukaryota
TRSP23689.t1	Tricho_longreads_scf.00006_856200	BTB/POZ domain containing protein	461	8.84209e-95	Acanthamoeba castellanii str. Neff	1257118	Eukaryota
TRSP34762.t1	Tricho_longreads_scf.00836_21704	rad50 subfamily protein	1313	0	Acanthamoeba castellanii str. Neff	1257118	Eukaryota
TRSP44599.t1	Tricho_longreads_scf.00011_772879	TolA, putative	507	2.30398e-50	Acanthamoeba castellanii str. Neff	1257118	Eukaryota
TRSP32218.t1	Tricho_longreads_scf.00080_261232	protein tolA, putative	336	6.38211e-65	Acanthamoeba castellanii str. Neff	1257118	Eukaryota
TRSP29241.t1	Tricho_longreads_scf.00066_273239	SAM domain (Sterile alpha motif) domain containing protein	476	7.89436e-31	Acanthamoeba castellanii str. Neff	1257118	Eukaryota
TRSP13645.t1	Tricho_longreads_scf.00034_409289	Signal transducer and activator of transcription STAT family protein	627	1.79079e-77	Acanthamoeba castellanii str. Neff	1257118	Eukaryota
TRSP8981.t1	Tricho_longreads_scf.00050_315752	leucine rich repeat domain containing protein	437	5.82303e-85	Acanthamoeba castellanii str. Neff	1257118	Eukaryota
TRSP1717.t1	Tricho_longreads_scf.00164_142938	prephenate dehydratase	541	1.62856e-125	Acanthamoeba castellanii str. Neff	1257118	Eukaryota
TRSP13446.t1	Tricho_longreads_scf.00010_779600	GTPase-activator protein for Ras family GTPase	627	3.41143e-56	Acanthamoeba castellanii str. Neff	1257118	Eukaryota
TRSP40345.t1	Tricho_longreads_scf.00031_423553	Ubox domain containing protein	828	2.86306e-90	Acanthamoeba castellanii str. Neff	1257118	Eukaryota
TRSP18207.t1	Tricho_longreads_scf.00032_419434	MORN repeatcontaining protein	282	6.54987e-32	Acanthamoeba castellanii str. Neff	1257118	Eukaryota
TRSP23595.t1	Tricho_longreads_scf.00006_856200	hypothetical protein ACA1_287570	165	3.70835e-27	Acanthamoeba castellanii str. Neff	1257118	Eukaryota
TRSP26357.t1	Tricho_longreads_scf.00208_95545	tetratricopeptide repeat domain containing protein	936	1.36167e-117	Acanthamoeba castellanii str. Neff	1257118	Eukaryota
TRSP18678.t1	Tricho_longreads_scf.00015_607500	replication protein A1, putative	1741	2.90662e-96	Acanthamoeba castellanii str. Neff	1257118	Eukaryota
TRSP25758.t1	Tricho_longreads_scf.00017_602044	diacylglycerol kinase accessory domain (presumed) domain containing protein	392	1.61178e-74	Acanthamoeba castellanii str. Neff	1257118	Eukaryota
TRSP5260.t1	Tricho_longreads_scf.00084_256585	universal stress domain containing protein	229	1.10763e-20	Acanthamoeba castellanii str. Neff	1257118	Eukaryota
TRSP3636.t1	Tricho_longreads_scf.00007_838757	BTB/POZ domain containing protein	348	3.13732e-30	Acanthamoeba castellanii str. Neff	1257118	Eukaryota
TRSP14858.t1	Tricho_longreads_scf.00027_457298	hypothetical protein ACA1_209420	902	2.41892e-141	Acanthamoeba castellanii str. Neff	1257118	Eukaryota
TRSP44390.t1	Tricho_longreads_scf.00011_772879	hypothetical protein ACA1_116400	183	6.85446e-33	Acanthamoeba castellanii str. Neff	1257118	Eukaryota
TRSP14071.t1	Tricho_longreads_scf.00001_1255013	ankyrin repeat domain 13 isoform 4, putative	958	5.02341e-86	Acanthamoeba castellanii str. Neff	1257118	Eukaryota
TRSP20299.t1	Tricho_longreads_scf.00087_242937	Poly(ADPribose) polymerase catalytic domain containing protein	746	7.45379e-63	Acanthamoeba castellanii str. Neff	1257118	Eukaryota
TRSP17749.t1	Tricho_longreads_scf.00046_325925	sugar (glycosidePentoside-hexuronide) transporter, putative	860	1.25196e-96	Acanthamoeba castellanii str. Neff	1257118	Eukaryota
TRSP25603.t1	Tricho_longreads_scf.00091_235394	BTB/POZ domain containing protein	242	6.33097e-17	Acanthamoeba castellanii str. Neff	1257118	Eukaryota
TRSP5934.t1	Tricho_longreads_scf.00406_33657	Rasrelated GTP-binding kinase	323	2.30966e-56	Acanthamoeba castellanii str. Neff	1257118	Eukaryota
TRSP36075.t1	Tricho_longreads_scf.00282_51426	Rasrelated GTP-binding kinase	323	2.30966e-56	Acanthamoeba castellanii str. Neff	1257118	Eukaryota
TRSP22920.t1	Tricho_longreads_scf.00255_62096	hypothetical protein ACA1_173920	132	5.06955e-16	Acanthamoeba castellanii str. Neff	1257118	Eukaryota
TRSP5465.t1	Tricho_longreads_scf.00189_114652	hypothetical protein ACA1_050630	170	3.11081e-32	Acanthamoeba castellanii str. Neff	1257118	Eukaryota
TRSP27984.t1	Tricho_longreads_scf.00043_341295	LBP / BPI / CETP family, Cterminal domain containing protein	488	7.29127e-87	Acanthamoeba castellanii str. Neff	1257118	Eukaryota
TRSP9141.t1	Tricho_longreads_scf.00041_348916	cytochrome p450 superfamily protein	505	5.4228e-104	Acanthamoeba castellanii str. Neff	1257118	Eukaryota
TRSP18118.t1	Tricho_longreads_scf.00032_419434	universal stress domain containing protein	298	4.25043e-21	Acanthamoeba castellanii str. Neff	1257118	Eukaryota
TRSP20169.t1	Tricho_longreads_scf.00243_66499	chain a, 4ank: a designed ankyrin repeat protein	174	3.78841e-22	Acanthamoeba castellanii str. Neff	1257118	Eukaryota
TRSP18786.t1	Tricho_longreads_scf.00015_607500	RasGEF domain containing protein	1089	4.9887e-61	Acanthamoeba castellanii str. Neff	1257118	Eukaryota
TRSP44437.t1	Tricho_longreads_scf.00011_772879	hypothetical protein ACA1_197880	238	1.24819e-36	Acanthamoeba castellanii str. Neff	1257118	Eukaryota
TRSP25418.t1	Tricho_longreads_scf.00159_146039	TolA, putative	450	7.81575e-46	Acanthamoeba castellanii str. Neff	1257118	Eukaryota
TRSP7474.t1	Tricho_longreads_scf.00016_607116	transporter, major facilitator subfamily protein	475	2.58226e-59	Acanthamoeba castellanii str. Neff	1257118	Eukaryota
TRSP42758.t1	Tricho_longreads_scf.00096_227714	GTPaseactivating protein	620	7.53948e-55	Acanthamoeba castellanii str. Neff	1257118	Eukaryota
TRSP31998.t1	Tricho_longreads_scf.00141_160753	peroxidase, putative	348	2.54069e-68	Acanthamoeba castellanii str. Neff	1257118	Eukaryota
TRSP39074.t1	Tricho_longreads_scf.00075_266310	RhoGEF domain containing protein	547	2.09498e-47	Acanthamoeba castellanii str. Neff	1257118	Eukaryota
TRSP14287.t1	Tricho_longreads_scf.00001_1255013	MORN repeatcontaining protein	167	2.44223e-21	Acanthamoeba castellanii str. Neff	1257118	Eukaryota
TRSP19952.t1	Tricho_longreads_scf.00192_113109	endonuclease/exonuclease/phosphatase family protein	333	4.12859e-58	Acanthamoeba castellanii str. Neff	1257118	Eukaryota
TRSP14716.t1	Tricho_longreads_scf.00107_209387	zinc finger, C3HC4 type (RING finger) domain containing protein	426	8.72306e-91	Acanthamoeba castellanii str. Neff	1257118	Eukaryota
TRSP32210.t1	Tricho_longreads_scf.00080_261232	MORN repeatcontaining protein	280	1.92123e-29	Acanthamoeba castellanii str. Neff	1257118	Eukaryota
TRSP23402.t1	Tricho_longreads_scf.00271_53037	Poly(ADPribose) polymerase catalytic domain containing protein	983	5.48715e-123	Acanthamoeba castellanii str. Neff	1257118	Eukaryota
TRSP8517.t1	Tricho_longreads_scf.00281_51443	von Willebrand factor type A domain containing protein	480	1.00714e-74	Acanthamoeba castellanii str. Neff	1257118	Eukaryota
TRSP43835.t1	Tricho_longreads_scf.00168_138567	IgA Peptidase M64 protein	419	1.41786e-105	Acanthamoeba castellanii str. Neff	1257118	Eukaryota
TRSP9135.t1	Tricho_longreads_scf.00041_348916	slime mold cyclic amp receptor protein	342	4.41769e-42	Acanthamoeba castellanii str. Neff	1257118	Eukaryota
TRSP16636.t1	Tricho_longreads_scf.00012_738869	protein tolA, putative	405	1.45556e-61	Acanthamoeba castellanii str. Neff	1257118	Eukaryota
TRSP10481.t1	Tricho_longreads_scf.00138_164325	IPT/TIG domain containing protein	819	1.86237e-104	Acanthamoeba castellanii str. Neff	1257118	Eukaryota
TRSP29176.t1	Tricho_longreads_scf.00914_20584	transporter, major facilitator subfamily protein	444	1.86297e-93	Acanthamoeba castellanii str. Neff	1257118	Eukaryota
TRSP10075.t1	Tricho_longreads_scf.00004_931448	transporter, major facilitator subfamily protein	444	1.78454e-93	Acanthamoeba castellanii str. Neff	1257118	Eukaryota
TRSP29582.t1	Tricho_longreads_scf.00038_359085	von Willebrand factor type A domain containing protein	897	1.29598e-106	Acanthamoeba castellanii str. Neff	1257118	Eukaryota
TRSP23008.t1	Tricho_longreads_scf.00061_286003	actin related protein 2/3 complex, subunit 5like, putative	130	8.56103e-19	Acanthamoeba castellanii str. Neff	1257118	Eukaryota
TRSP14584.t1	Tricho_longreads_scf.00771_22487	hypothetical protein ACA1_341040	122	2.53231e-11	Acanthamoeba castellanii str. Neff	1257118	Eukaryota
TRSP33465.t1	Tricho_longreads_scf.00020_510754	G-protein beta WD-40 repeat domain containing protein	712	8.71915e-56	Acanthamoeba castellanii str. Neff	1257118	Eukaryota
TRSP13138.t1	Tricho_longreads_scf.00114_200515	protein kinase domain containing protein	598	2.35083e-41	Acanthamoeba castellanii str. Neff	1257118	Eukaryota
TRSP18848.t1	Tricho_longreads_scf.00015_607500	PX domain containing protein	437	6.36343e-64	Acanthamoeba castellanii str. Neff	1257118	Eukaryota
TRSP38367.t1	Tricho_longreads_scf.01280_16634	hypothetical protein ACA1_285670, partial	261	5.16431e-38	Acanthamoeba castellanii str. Neff	1257118	Eukaryota
TRSP20522.t1	Tricho_longreads_scf.00503_28807	hypothetical protein ACA1_285670, partial	261	1.10936e-37	Acanthamoeba castellanii str. Neff	1257118	Eukaryota
TRSP9966.t1	Tricho_longreads_scf.00004_931448	leucine rich repeat domain containing protein	501	4.87345e-98	Acanthamoeba castellanii str. Neff	1257118	Eukaryota
TRSP14406.t1	Tricho_longreads_scf.00001_1255013	vacuolar sorting protein 9 (vps9) domain containing protein	497	9.05979e-63	Acanthamoeba castellanii str. Neff	1257118	Eukaryota
TRSP3494.t1	Tricho_longreads_scf.00007_838757	hypothetical protein ACA1_113470	2024	6.49358e-121	Acanthamoeba castellanii str. Neff	1257118	Eukaryota
TRSP13283.t1	Tricho_longreads_scf.00010_779600	poly(adpribose) glycohydrolase	532	3.10075e-76	Acanthamoeba castellanii str. Neff	1257118	Eukaryota
TRSP2819.t1	Tricho_longreads_scf.00684_23967	ribonuclease HI, putative	911	1.07058e-36	Acanthamoeba castellanii str. Neff	1257118	Eukaryota
TRSP28126.t1	Tricho_longreads_scf.00089_236149	ATPase, AAA domain containing protein	588	1.89412e-89	Acanthamoeba castellanii str. Neff	1257118	Eukaryota
TRSP12503.t1	Tricho_longreads_scf.00124_185874	SWIM zinc finger domain containing protein	328	2.64901e-18	Acanthamoeba castellanii str. Neff	1257118	Eukaryota
TRSP24771.t1	Tricho_longreads_scf.00008_824997	DHHC zinc finger domain containing protein	162	8.29091e-23	Acanthamoeba castellanii str. Neff	1257118	Eukaryota
TRSP14884.t1	Tricho_longreads_scf.00027_457298	hypothetical protein ACA1_051450	373	1.81511e-54	Acanthamoeba castellanii str. Neff	1257118	Eukaryota
TRSP33638.t1	Tricho_longreads_scf.00020_510754	von Willebrand factor type A domain containing protein	473	3.06506e-71	Acanthamoeba castellanii str. Neff	1257118	Eukaryota
TRSP29751.t1	Tricho_longreads_scf.00117_196398	hypothetical protein ACA1_174560	353	5.28267e-63	Acanthamoeba castellanii str. Neff	1257118	Eukaryota
TRSP13899.t1	Tricho_longreads_scf.00093_229579	MORN repeatcontaining protein	239	3.26391e-25	Acanthamoeba castellanii str. Neff	1257118	Eukaryota
TRSP27242.t1	Tricho_longreads_scf.00052_310865	protein kinase 2, putative	399	5.4502e-17	Acanthamoeba castellanii str. Neff	1257118	Eukaryota
TRSP19544.t1	Tricho_longreads_scf.00035_405242	Proteintyrosine phosphatase	357	2.93023e-55	Acanthamoeba castellanii str. Neff	1257118	Eukaryota
TRSP23550.t1	Tricho_longreads_scf.00006_856200	WD domain, G-beta repeat-containing protein	592	1.78339e-121	Acanthamoeba castellanii str. Neff	1257118	Eukaryota
TRSP25339.t1	Tricho_longreads_scf.00166_140178	hypothetical protein ACA1_113470	1241	4.64092e-100	Acanthamoeba castellanii str. Neff	1257118	Eukaryota
TRSP34328.t1	Tricho_longreads_scf.00019_512507	RasGEF domain containing protein	418	4.88931e-74	Acanthamoeba castellanii str. Neff	1257118	Eukaryota
TRSP15987.t1	Tricho_longreads_scf.00013_658143	alcohol dehydrogenase zinc-binding domain containing protein	345	4.84625e-63	Acanthamoeba castellanii str. Neff	1257118	Eukaryota
TRSP14085.t1	Tricho_longreads_scf.00001_1255013	LBP / BPI / CETP family, Cterminal domain containing protein	474	8.261e-95	Acanthamoeba castellanii str. Neff	1257118	Eukaryota
TRSP16941.t1	Tricho_longreads_scf.00002_1182365	regulator of g protein signaling domain containing protein	186	2.94996e-16	Acanthamoeba castellanii str. Neff	1257118	Eukaryota
TRSP4984.t1	Tricho_longreads_scf.00062_284551	universal stress protein	237	3.58949e-15	Acanthamoeba castellanii str. Neff	1257118	Eukaryota
TRSP24138.t1	Tricho_longreads_scf.00022_503607	hypothetical protein ACA1_070880	138	0.000216751	Acanthamoeba castellanii str. Neff	1257118	Eukaryota
TRSP32586.t1	Tricho_longreads_scf.00101_216346	RasGEF domain containing protein	796	2.13867e-57	Acanthamoeba castellanii str. Neff	1257118	Eukaryota
TRSP33652.t1	Tricho_longreads_scf.00020_510754	RasGEF domain containing protein	1088	1.75912e-70	Acanthamoeba castellanii str. Neff	1257118	Eukaryota
TRSP20574.t1	Tricho_longreads_scf.00232_75092	LIM domain containing protein	133	1.95382e-20	Acanthamoeba castellanii str. Neff	1257118	Eukaryota
TRSP8489.t1	Tricho_longreads_scf.00220_85460	GTPbinding nuclear protein Ran, putative	176	2.87516e-29	Acanthamoeba castellanii str. Neff	1257118	Eukaryota
TRSP21235.t1	Tricho_longreads_scf.00028_441143	Phosphatidylinositol4-phosphate 5-Kinase protein	669	4.77978e-120	Acanthamoeba castellanii str. Neff	1257118	Eukaryota
TRSP4938.t1	Tricho_longreads_scf.00062_284551	RecF/RecN/SMC domain containing protein	1088	0	Acanthamoeba castellanii str. Neff	1257118	Eukaryota
TRSP40651.t1	Tricho_longreads_scf.00236_72682	YEATS family protein	216	2.59751e-34	Acanthamoeba castellanii str. Neff	1257118	Eukaryota
TRSP7052.t1	Tricho_longreads_scf.00051_312876	hypothetical protein ACA1_220210	466	4.36927e-28	Acanthamoeba castellanii str. Neff	1257118	Eukaryota
TRSP3906.t1	Tricho_longreads_scf.00134_167559	START domain containing protein	233	1.12184e-29	Acanthamoeba castellanii str. Neff	1257118	Eukaryota
TRSP14910.t1	Tricho_longreads_scf.00027_457298	hypothetical protein ACA1_373600	657	2.76721e-68	Acanthamoeba castellanii str. Neff	1257118	Eukaryota
TRSP37426.t1	Tricho_longreads_scf.01759_13310	GapPol polyprotein	353	1.93586e-55	Acanthamoeba castellanii str. Neff	1257118	Eukaryota
TRSP18081.t1	Tricho_longreads_scf.00032_419434	stress responsive A/B barrel domain protein	102	5.69516e-12	Acanthamoeba castellanii str. Neff	1257118	Eukaryota
TRSP7192.t1	Tricho_longreads_scf.00401_33884	transporter, major facilitator subfamily protein	465	1.10035e-82	Acanthamoeba castellanii str. Neff	1257118	Eukaryota
TRSP23237.t1	Tricho_longreads_scf.00064_276406	transporter, major facilitator subfamily protein	465	1.04308e-82	Acanthamoeba castellanii str. Neff	1257118	Eukaryota
TRSP34279.t1	Tricho_longreads_scf.00019_512507	BTB/POZ domain containing protein	496	7.84124e-99	Acanthamoeba castellanii str. Neff	1257118	Eukaryota
TRSP18101.t1	Tricho_longreads_scf.00032_419434	tetratricopeptide repeat domain containing protein	935	6.79872e-110	Acanthamoeba castellanii str. Neff	1257118	Eukaryota
TRSP41677.t1	Tricho_longreads_scf.00492_29064	hypothetical protein ACA1_158020	253	7.51881e-24	Acanthamoeba castellanii str. Neff	1257118	Eukaryota
TRSP44209.t1	Tricho_longreads_scf.00009_791302	hypothetical protein ACA1_158020	231	8.25199e-25	Acanthamoeba castellanii str. Neff	1257118	Eukaryota
TRSP15918.t1	Tricho_longreads_scf.00013_658143	endonuclease/exonuclease/phosphatase family protein	267	1.18054e-39	Acanthamoeba castellanii str. Neff	1257118	Eukaryota
TRSP11103.t1	Tricho_longreads_scf.00059_288384	Mitochondrial carrier protein	311	3.16519e-59	Acanthamoeba castellanii str. Neff	1257118	Eukaryota
TRSP25694.t1	Tricho_longreads_scf.00210_95007	cytochrome p450 superfamily protein	463	1.50481e-95	Acanthamoeba castellanii str. Neff	1257118	Eukaryota
TRSP4744.t1	Tricho_longreads_scf.00083_257487	ribosomal protein S10p/S20e, putative	384	1.1506e-08	Acanthamoeba castellanii str. Neff	1257118	Eukaryota
TRSP25350.t1	Tricho_longreads_scf.00166_140178	SPRY domain containing protein	954	2.01055e-19	Acanthamoeba castellanii str. Neff	1257118	Eukaryota
TRSP13997.t1	Tricho_longreads_scf.00001_1255013	Protein-tyrosine-phosphatase	358	1.02945e-61	Acanthamoeba castellanii str. Neff	1257118	Eukaryota
TRSP30770.t1	Tricho_longreads_scf.00056_299362	IPT/TIG domain containing protein	391	7.84806e-35	Acanthamoeba castellanii str. Neff	1257118	Eukaryota
TRSP45315.t1	Tricho_longreads_scf.00053_308123	KID repeat-containing protein	845	4.13765e-15	Acanthamoeba castellanii str. Neff	1257118	Eukaryota
TRSP5431.t1	Tricho_longreads_scf.00189_114652	hypothetical protein ACA1_037740	1906	5.47511e-78	Acanthamoeba castellanii str. Neff	1257118	Eukaryota
TRSP25792.t1	Tricho_longreads_scf.00017_602044	DNA repair protein XRCC3, putative	406	1.00542e-53	Acanthamoeba castellanii str. Neff	1257118	Eukaryota
TRSP21244.t1	Tricho_longreads_scf.00028_441143	hypothetical protein ACA1_131210	507	3.17177e-72	Acanthamoeba castellanii str. Neff	1257118	Eukaryota
TRSP43943.t1	Tricho_longreads_scf.00009_791302	RhoGEF domain containing protein	393	8.11291e-43	Acanthamoeba castellanii str. Neff	1257118	Eukaryota
TRSP27248.t1	Tricho_longreads_scf.00052_310865	'chromo' (CHRromatin Organization MOdifier) domain containing protein	313	1.56362e-39	Acanthamoeba castellanii str. Neff	1257118	Eukaryota
TRSP40344.t1	Tricho_longreads_scf.00031_423553	class I glutamine amidotransferase domain containing protein	241	1.30581e-30	Acanthamoeba castellanii str. Neff	1257118	Eukaryota
TRSP23880.t1	Tricho_longreads_scf.00105_211905	copper/zinc superoxide dismutase	447	5.42733e-61	Acanthamoeba castellanii str. Neff	1257118	Eukaryota
TRSP24295.t1	Tricho_longreads_scf.00198_110860	serine/threonineprotein kinase	811	2.57291e-158	Acanthamoeba castellanii str. Neff	1257118	Eukaryota
TRSP17459.t1	Tricho_longreads_scf.00069_270160	hypothetical protein ACA1_400560	575	2.25601e-17	Acanthamoeba castellanii str. Neff	1257118	Eukaryota
TRSP35761.t1	Tricho_longreads_scf.00139_163662	protein kinase domain containing protein	589	1.69274e-87	Acanthamoeba castellanii str. Neff	1257118	Eukaryota
TRSP42009.t1	Tricho_longreads_scf.00037_392589	dual specificity protein phosphatase	227	3.44574e-45	Acanthamoeba castellanii str. Neff	1257118	Eukaryota
TRSP26406.t1	Tricho_longreads_scf.00077_264455	hypothetical protein ACA1_198320	522	2.46393e-93	Acanthamoeba castellanii str. Neff	1257118	Eukaryota
TRSP1134.t1	Tricho_longreads_scf.00086_252263	BTB/POZ domain containing protein	464	1.20515e-64	Acanthamoeba castellanii str. Neff	1257118	Eukaryota
TRSP20147.t1	Tricho_longreads_scf.00079_261360	Phytanoyl-CoA dioxygenase	707	4.76792e-49	Acanthamoeba castellanii str. Neff	1257118	Eukaryota
TRSP9730.t1	Tricho_longreads_scf.00004_931448	Phytanoyl-CoA dioxygenase	707	5.65457e-49	Acanthamoeba castellanii str. Neff	1257118	Eukaryota
TRSP39022.t1	Tricho_longreads_scf.00075_266310	hypothetical protein ACA1_295780	242	7.68526e-29	Acanthamoeba castellanii str. Neff	1257118	Eukaryota
TRSP8992.t1	Tricho_longreads_scf.00050_315752	poly ADP-ribose glycohydrolase (PARG) protein, putative	607	1.37743e-84	Acanthamoeba castellanii str. Neff	1257118	Eukaryota
TRSP22806.t1	Tricho_longreads_scf.00023_491334	cytochrome p450 superfamily protein	459	2.427e-94	Acanthamoeba castellanii str. Neff	1257118	Eukaryota
TRSP44050.t1	Tricho_longreads_scf.00009_791302	MORN repeatcontaining protein	169	1.80376e-08	Acanthamoeba castellanii str. Neff	1257118	Eukaryota
TRSP14286.t1	Tricho_longreads_scf.00001_1255013	acylCoA synthetase	608	1.01278e-157	Acanthamoeba castellanii str. Neff	1257118	Eukaryota
TRSP1346.t1	Tricho_longreads_scf.00460_30411	TolAlike protein	265	2.86551e-59	Acanthamoeba castellanii str. Neff	1257118	Eukaryota
TRSP14798.t1	Tricho_longreads_scf.00263_56793	TolAlike protein	265	2.86551e-59	Acanthamoeba castellanii str. Neff	1257118	Eukaryota
TRSP3582.t1	Tricho_longreads_scf.00007_838757	hypothetical protein ACA1_093540	1608	0	Acanthamoeba castellanii str. Neff	1257118	Eukaryota
TRSP8947.t1	Tricho_longreads_scf.00050_315752	Ubiquitin carboxylterminal hydrolase 15, putative	427	1.46362e-29	Acanthamoeba castellanii str. Neff	1257118	Eukaryota
TRSP29470.t1	Tricho_longreads_scf.00038_359085	hypothetical protein ACA1_336920	1204	2.37822e-11	Acanthamoeba castellanii str. Neff	1257118	Eukaryota
TRSP28451.t1	Tricho_longreads_scf.00044_330626	serine/threonine kinase	522	6.32779e-53	Acanthamoeba castellanii str. Neff	1257118	Eukaryota
TRSP10558.t1	Tricho_longreads_scf.00149_154273	protein kinase domain containing protein	816	9.33423e-53	Acanthamoeba castellanii str. Neff	1257118	Eukaryota
TRSP16328.t1	Tricho_longreads_scf.00003_1004824	CBS domain containing protein	312	3.18451e-30	Acanthamoeba castellanii str. Neff	1257118	Eukaryota
TRSP9963.t1	Tricho_longreads_scf.00004_931448	cytochrome p450 superfamily protein	474	3.7046e-84	Acanthamoeba castellanii str. Neff	1257118	Eukaryota
TRSP3253.t1	Tricho_longreads_scf.00217_88237	protein kinase	810	5.27401e-134	Acanthamoeba castellanii str. Neff	1257118	Eukaryota
TRSP9308.t1	Tricho_longreads_scf.00358_37255	BTB/POZ domain containing protein	444	2.39996e-75	Acanthamoeba castellanii str. Neff	1257118	Eukaryota
TRSP34171.t1	Tricho_longreads_scf.00019_512507	hypothetical protein ACA1_383540	275	2.4087e-27	Acanthamoeba castellanii str. Neff	1257118	Eukaryota
TRSP15794.t1	Tricho_longreads_scf.00013_658143	calpain family cysteine protease domain containing protein	805	3.46801e-30	Acanthamoeba castellanii str. Neff	1257118	Eukaryota
TRSP33583.t1	Tricho_longreads_scf.00020_510754	TROVE domain containing protein	922	5.11525e-112	Acanthamoeba castellanii str. Neff	1257118	Eukaryota
TRSP20703.t1	Tricho_longreads_scf.00535_27616	hypothetical protein ACA1_290830	450	1.40092e-45	Acanthamoeba castellanii str. Neff	1257118	Eukaryota
TRSP11971.t1	Tricho_longreads_scf.00067_272662	Fbox domain containing protein	560	5.32658e-26	Acanthamoeba castellanii str. Neff	1257118	Eukaryota
TRSP3562.t1	Tricho_longreads_scf.00007_838757	SET domain containing protein	411	2.79423e-54	Acanthamoeba castellanii str. Neff	1257118	Eukaryota
TRSP15973.t1	Tricho_longreads_scf.00013_658143	SH3 domain containing protein	507	1.35051e-31	Acanthamoeba castellanii str. Neff	1257118	Eukaryota
TRSP9783.t1	Tricho_longreads_scf.00004_931448	ankyrin repeat-containing protein	453	5.26292e-88	Acanthamoeba castellanii str. Neff	1257118	Eukaryota
TRSP23584.t1	Tricho_longreads_scf.00006_856200	GIYYIG catalytic domain containing protein	309	1.16249e-56	Acanthamoeba castellanii str. Neff	1257118	Eukaryota
TRSP22747.t1	Tricho_longreads_scf.00023_491334	hypothetical protein ACA1_285670, partial	183	1.61709e-27	Acanthamoeba castellanii str. Neff	1257118	Eukaryota
TRSP24695.t1	Tricho_longreads_scf.00008_824997	ankyrin repeat domain 13 isoform 4, putative	458	1.44255e-90	Acanthamoeba castellanii str. Neff	1257118	Eukaryota
TRSP17751.t1	Tricho_longreads_scf.00046_325925	tRNA binding domain containing protein	408	2.80892e-56	Acanthamoeba castellanii str. Neff	1257118	Eukaryota
TRSP25426.t1	Tricho_longreads_scf.00159_146039	hypothetical protein ACA1_036360	1252	1.41031e-76	Acanthamoeba castellanii str. Neff	1257118	Eukaryota
TRSP17128.t1	Tricho_longreads_scf.00002_1182365	TolA, putative	533	1.96942e-52	Acanthamoeba castellanii str. Neff	1257118	Eukaryota
TRSP44761.t1	Tricho_longreads_scf.00174_133189	hypothetical protein ACA1_113470	1217	1.87328e-106	Acanthamoeba castellanii str. Neff	1257118	Eukaryota
TRSP33991.t1	Tricho_longreads_scf.00743_23015	DnaJ domain containing protein	306	2.32831e-63	Acanthamoeba castellanii str. Neff	1257118	Eukaryota
TRSP28568.t1	Tricho_longreads_scf.00044_330626	DnaJ domain containing protein	306	7.87501e-64	Acanthamoeba castellanii str. Neff	1257118	Eukaryota
TRSP17077.t1	Tricho_longreads_scf.00002_1182365	TolA, putative	551	3.18662e-50	Acanthamoeba castellanii str. Neff	1257118	Eukaryota
TRSP1005.t1	Tricho_longreads_scf.00181_122754	tetratricopeptide repeat domain containing protein	1323	8.6823e-113	Acanthamoeba castellanii str. Neff	1257118	Eukaryota
TRSP27933.t1	Tricho_longreads_scf.00043_341295	RNA recognition motif domain containing protein	438	1.08296e-15	Acanthamoeba castellanii str. Neff	1257118	Eukaryota
TRSP32587.t1	Tricho_longreads_scf.00101_216346	SET and MYND domain containing 3, putative	371	7.86442e-50	Acanthamoeba castellanii str. Neff	1257118	Eukaryota
TRSP39997.t1	Tricho_longreads_scf.00130_174597	CBS domain containing protein	358	2.88791e-35	Acanthamoeba castellanii str. Neff	1257118	Eukaryota
TRSP23414.t1	Tricho_longreads_scf.00271_53037	hypothetical protein ACA1_383540	275	4.8843e-27	Acanthamoeba castellanii str. Neff	1257118	Eukaryota
TRSP44788.t1	Tricho_longreads_scf.00174_133189	hypothetical protein ACA1_383540	275	4.8843e-27	Acanthamoeba castellanii str. Neff	1257118	Eukaryota
TRSP26751.t1	Tricho_longreads_scf.00063_281444	protein kinase domain containing protein	574	1.36427e-74	Acanthamoeba castellanii str. Neff	1257118	Eukaryota
TRSP27904.t1	Tricho_longreads_scf.00043_341295	RhoGEF domain containing protein	456	2.40913e-39	Acanthamoeba castellanii str. Neff	1257118	Eukaryota
TRSP42603.t1	Tricho_longreads_scf.00014_642678	hydrolase, carbonnitrogen superfamily protein	957	8.20122e-38	Acanthamoeba castellanii str. Neff	1257118	Eukaryota
TRSP14818.t1	Tricho_longreads_scf.00027_457298	Nicotinamide riboside kinase 1 family protein	187	1.08252e-17	Acanthamoeba castellanii str. Neff	1257118	Eukaryota
TRSP17864.t1	Tricho_longreads_scf.00046_325925	RhoGEF domain containing protein	710	1.98596e-32	Acanthamoeba castellanii str. Neff	1257118	Eukaryota
TRSP19089.t1	Tricho_longreads_scf.00212_91274	ZFAND1 protein	281	1.71355e-47	Acanthamoeba castellanii str. Neff	1257118	Eukaryota
TRSP34270.t1	Tricho_longreads_scf.00019_512507	hypothetical protein ACA1_010190, partial	846	6.73983e-65	Acanthamoeba castellanii str. Neff	1257118	Eukaryota
TRSP20133.t1	Tricho_longreads_scf.00079_261360	hypothetical protein ACA1_113470	1311	1.94326e-111	Acanthamoeba castellanii str. Neff	1257118	Eukaryota
TRSP8161.t1	Tricho_longreads_scf.00131_172796	hypothetical protein ACA1_295320	206	1.25064e-05	Acanthamoeba castellanii str. Neff	1257118	Eukaryota
TRSP3487.t1	Tricho_longreads_scf.00007_838757	hypothetical protein ACA1_113470	1800	2.63164e-96	Acanthamoeba castellanii str. Neff	1257118	Eukaryota
TRSP43830.t1	Tricho_longreads_scf.00168_138567	nicotinate phosphoribosyltransferase, (NAPRTase) subfamily protein	165	6.97885e-30	Acanthamoeba castellanii str. Neff	1257118	Eukaryota
TRSP10983.t1	Tricho_longreads_scf.02070_11921	hypothetical protein ACA1_070410	405	1.16764e-64	Acanthamoeba castellanii str. Neff	1257118	Eukaryota
TRSP20711.t1	Tricho_longreads_scf.00026_458223	hypothetical protein ACA1_070410	405	1.16764e-64	Acanthamoeba castellanii str. Neff	1257118	Eukaryota
TRSP29348.t1	Tricho_longreads_scf.00121_192605	hypothetical protein ACA1_058310	328	2.44528e-08	Acanthamoeba castellanii str. Neff	1257118	Eukaryota
TRSP40168.t1	Tricho_longreads_scf.00180_127864	hypothetical protein ACA1_379130	278	1.57347e-37	Acanthamoeba castellanii str. Neff	1257118	Eukaryota
TRSP8734.t1	Tricho_longreads_scf.00201_104657	SAM domain (Sterile alpha motif) domain containing protein	450	7.77451e-60	Acanthamoeba castellanii str. Neff	1257118	Eukaryota
TRSP23117.t1	Tricho_longreads_scf.00197_110896	CBS domain containing protein	341	6.9125e-41	Acanthamoeba castellanii str. Neff	1257118	Eukaryota
TRSP9350.t1	Tricho_longreads_scf.00177_128716	PQ loop repeat-containing protein	340	5.28808e-35	Acanthamoeba castellanii str. Neff	1257118	Eukaryota
TRSP11250.t1	Tricho_longreads_scf.00030_432512	Ubiquitin carboxylterminal hydrolase	935	6.99419e-71	Acanthamoeba castellanii str. Neff	1257118	Eukaryota
TRSP20047.t1	Tricho_longreads_scf.00245_66361	LMBR1 domain containing protein	1666	6.6906e-88	Acanthamoeba castellanii str. Neff	1257118	Eukaryota
TRSP39070.t1	Tricho_longreads_scf.00075_266310	RhoGEF domain containing protein	623	1.21189e-40	Acanthamoeba castellanii str. Neff	1257118	Eukaryota
TRSP6196.t1	Tricho_longreads_scf.00468_30083	adaptin subfamily protein	305	2.8439e-36	Acanthamoeba castellanii str. Neff	1257118	Eukaryota
TRSP23248.t1	Tricho_longreads_scf.00064_276406	transporter, major facilitator subfamily protein	369	2.34339e-63	Acanthamoeba castellanii str. Neff	1257118	Eukaryota
TRSP16284.t1	Tricho_longreads_scf.00003_1004824	ATPase, AAA domain containing protein	452	4.71922e-85	Acanthamoeba castellanii str. Neff	1257118	Eukaryota
TRSP12746.t1	Tricho_longreads_scf.00116_197489	serine carboxypeptidase	477	1.7292e-102	Acanthamoeba castellanii str. Neff	1257118	Eukaryota
TRSP32900.t1	Tricho_longreads_scf.00025_477026	hypothetical protein ACA1_397180	720	1.87903e-97	Acanthamoeba castellanii str. Neff	1257118	Eukaryota
TRSP13300.t1	Tricho_longreads_scf.00010_779600	telomeraseassociated protein 1, putative	2033	0	Acanthamoeba castellanii str. Neff	1257118	Eukaryota
TRSP16633.t1	Tricho_longreads_scf.00012_738869	Protein of unknown function (DUF1253) containing protein	681	2.01504e-96	Acanthamoeba castellanii str. Neff	1257118	Eukaryota
TRSP20386.t1	Tricho_longreads_scf.00203_103303	translocase, putative	480	1.67895e-59	Acanthamoeba castellanii str. Neff	1257118	Eukaryota
TRSP18242.t1	Tricho_longreads_scf.00032_419434	translocase, putative	480	1.67895e-59	Acanthamoeba castellanii str. Neff	1257118	Eukaryota
TRSP22252.t1	Tricho_longreads_scf.00005_925709	RasGEF domain containing protein	660	3.73327e-65	Acanthamoeba castellanii str. Neff	1257118	Eukaryota
TRSP29859.t1	Tricho_longreads_scf.00143_159134	hypothetical protein ACA1_355860	501	1.11648e-86	Acanthamoeba castellanii str. Neff	1257118	Eukaryota
TRSP14266.t1	Tricho_longreads_scf.00001_1255013	pyridine nucleotidedisulfide oxidoreductase family protein	517	2.13137e-58	Acanthamoeba castellanii str. Neff	1257118	Eukaryota
TRSP12597.t1	Tricho_longreads_scf.00123_190498	GTPase activation domain containing protein	2197	4.02331e-51	Acanthamoeba castellanii str. Neff	1257118	Eukaryota
TRSP10364.t1	Tricho_longreads_scf.00033_419090	hypothetical protein ACA1_368220	681	5.61052e-127	Acanthamoeba castellanii str. Neff	1257118	Eukaryota
TRSP2336.t1	Tricho_longreads_scf.00936_20212	BTB/POZ domain containing protein	435	1.55161e-34	Acanthamoeba castellanii str. Neff	1257118	Eukaryota
TRSP21497.t1	Tricho_longreads_scf.00299_45739	BTB/POZ domain containing protein	435	1.55161e-34	Acanthamoeba castellanii str. Neff	1257118	Eukaryota
TRSP28638.t1	Tricho_longreads_scf.00211_93867	hypothetical protein ACA1_112560	848	3.6588e-59	Acanthamoeba castellanii str. Neff	1257118	Eukaryota
TRSP17809.t1	Tricho_longreads_scf.00046_325925	protein kinase domain containing protein	583	2.98886e-41	Acanthamoeba castellanii str. Neff	1257118	Eukaryota
TRSP22821.t1	Tricho_longreads_scf.00023_491334	copper/zinc superoxide dismutase	398	8.85005e-57	Acanthamoeba castellanii str. Neff	1257118	Eukaryota
TRSP14226.t1	Tricho_longreads_scf.00001_1255013	hypothetical protein ACA1_054060	353	2.687e-59	Acanthamoeba castellanii str. Neff	1257118	Eukaryota
TRSP25961.t1	Tricho_longreads_scf.00017_602044	DEAD/DEAH box helicase domain containing protein	627	8.02803e-97	Acanthamoeba castellanii str. Neff	1257118	Eukaryota
TRSP23298.t1	Tricho_longreads_scf.00242_66736	transcriptional regulatorrelated, putative	1116	9.57089e-177	Acanthamoeba castellanii str. Neff	1257118	Eukaryota
TRSP16109.t1	Tricho_longreads_scf.00003_1004824	protein involved in vacuole import and degradation, putative	706	3.25732e-144	Acanthamoeba castellanii str. Neff	1257118	Eukaryota
TRSP21213.t1	Tricho_longreads_scf.00028_441143	serine carboxypeptidase	481	1.01826e-100	Acanthamoeba castellanii str. Neff	1257118	Eukaryota
TRSP12599.t1	Tricho_longreads_scf.00123_190498	RhoGEF domain containing protein	1129	1.01097e-55	Acanthamoeba castellanii str. Neff	1257118	Eukaryota
TRSP18335.t1	Tricho_longreads_scf.00029_440001	WD domain, Gbeta repeat/F-box domain containing protein	465	4.78363e-67	Acanthamoeba castellanii str. Neff	1257118	Eukaryota
TRSP9965.t1	Tricho_longreads_scf.00004_931448	golgi family protein, putative	1400	3.26785e-93	Acanthamoeba castellanii str. Neff	1257118	Eukaryota
TRSP42988.t1	Tricho_longreads_scf.01056_18844	hypothetical protein ACA1_051450	378	6.60735e-46	Acanthamoeba castellanii str. Neff	1257118	Eukaryota
TRSP30715.t1	Tricho_longreads_scf.00056_299362	hypothetical protein ACA1_051450	378	6.60735e-46	Acanthamoeba castellanii str. Neff	1257118	Eukaryota
TRSP7059.t1	Tricho_longreads_scf.00051_312876	hypothetical protein ACA1_278960	679	1.33249e-49	Acanthamoeba castellanii str. Neff	1257118	Eukaryota
TRSP18750.t1	Tricho_longreads_scf.00015_607500	hypothetical protein ACA1_228910	560	1.01021e-88	Acanthamoeba castellanii str. Neff	1257118	Eukaryota
TRSP25147.t1	Tricho_longreads_scf.00098_222063	hypothetical protein ACA1_282980	204	1.56674e-38	Acanthamoeba castellanii str. Neff	1257118	Eukaryota
TRSP29510.t1	Tricho_longreads_scf.00038_359085	G-protein beta WD-40 repeat domain containing protein	547	2.30806e-53	Acanthamoeba castellanii str. Neff	1257118	Eukaryota
TRSP25883.t1	Tricho_longreads_scf.00017_602044	leucine rich repeat domain containing protein	1068	2.21722e-173	Acanthamoeba castellanii str. Neff	1257118	Eukaryota
TRSP6753.t1	Tricho_longreads_scf.01190_17471	betaxylosidase	887	3.70582e-147	Acanthamoeba castellanii str. Neff	1257118	Eukaryota
TRSP34403.t1	Tricho_longreads_scf.01061_18785	adaptin subfamily protein	305	2.44056e-36	Acanthamoeba castellanii str. Neff	1257118	Eukaryota
TRSP6193.t1	Tricho_longreads_scf.00468_30083	adaptin subfamily protein	305	2.44056e-36	Acanthamoeba castellanii str. Neff	1257118	Eukaryota
TRSP25058.t1	Tricho_longreads_scf.00313_43357	adaptin subfamily protein	305	2.44056e-36	Acanthamoeba castellanii str. Neff	1257118	Eukaryota
TRSP35749.t1	Tricho_longreads_scf.00139_163662	Sel1 repeat-containing protein	636	4.54436e-96	Acanthamoeba castellanii str. Neff	1257118	Eukaryota
TRSP19874.t1	Tricho_longreads_scf.00085_255005	protein kinase domain containing protein	1147	7.00102e-102	Acanthamoeba castellanii str. Neff	1257118	Eukaryota
TRSP9445.t1	Tricho_longreads_scf.00154_148902	RhoGEF domain containing protein	695	2.33738e-39	Acanthamoeba castellanii str. Neff	1257118	Eukaryota
TRSP24017.t1	Tricho_longreads_scf.00022_503607	von Willebrand factor type A domain containing protein	932	1.64453e-83	Acanthamoeba castellanii str. Neff	1257118	Eukaryota
TRSP30859.t1	Tricho_longreads_scf.00113_200828	Interferoninducible protein Gig2, putative	1197	0	Acanthamoeba castellanii str. Neff	1257118	Eukaryota
TRSP31621.t1	Tricho_longreads_scf.00157_146689	tetratricopeptide repeat domain containing protein	535	4.47934e-19	Acanthamoeba castellanii str. Neff	1257118	Eukaryota
TRSP9053.t1	Tricho_longreads_scf.00050_315752	Choline/Carnitine oacyltransferase superfamily protein	954	3.39414e-85	Acanthamoeba castellanii str. Neff	1257118	Eukaryota
TRSP45222.t1	Tricho_longreads_scf.00053_308123	RasGEF domain containing protein	543	1.53638e-58	Acanthamoeba castellanii str. Neff	1257118	Eukaryota
TRSP11265.t1	Tricho_longreads_scf.00030_432512	THO1 protein (nuclear matrix protein p84), putative	516	1.44776e-43	Acanthamoeba castellanii str. Neff	1257118	Eukaryota
TRSP18662.t1	Tricho_longreads_scf.00015_607500	hypothetical protein ACA1_133480	249	1.22049e-10	Acanthamoeba castellanii str. Neff	1257118	Eukaryota
TRSP14349.t1	Tricho_longreads_scf.00001_1255013	hypothetical protein ACA1_220200	754	9.70418e-116	Acanthamoeba castellanii str. Neff	1257118	Eukaryota
TRSP39407.t1	Tricho_longreads_scf.00018_567815	hypothetical protein ACA1_141940	324	3.33352e-41	Acanthamoeba castellanii str. Neff	1257118	Eukaryota
TRSP23548.t1	Tricho_longreads_scf.00006_856200	phosphoinositide 3kinase family, accessory domain (pik domain) domain containing protein	1012	7.47072e-175	Acanthamoeba castellanii str. Neff	1257118	Eukaryota
TRSP30432.t1	Tricho_longreads_scf.00068_270245	CBS domain containing protein	330	2.52435e-32	Acanthamoeba castellanii str. Neff	1257118	Eukaryota
TRSP19836.t1	Tricho_longreads_scf.00085_255005	transmembrane protein	406	4.18123e-49	Acanthamoeba castellanii str. Neff	1257118	Eukaryota
TRSP6285.t1	Tricho_longreads_scf.00073_267302	RhoGEF domain containing protein	1032	1.62155e-29	Acanthamoeba castellanii str. Neff	1257118	Eukaryota
TRSP15241.t1	Tricho_longreads_scf.00057_299299	calponin domain containing protein	1071	3.92383e-33	Acanthamoeba castellanii str. Neff	1257118	Eukaryota
TRSP8426.t1	Tricho_longreads_scf.00258_59249	tetratricopeptide repeat-containing protein	1143	3.3016e-131	Acanthamoeba castellanii str. Neff	1257118	Eukaryota
TRSP42632.t1	Tricho_longreads_scf.00014_642678	RhoGEF domain containing protein	585	1.4185e-32	Acanthamoeba castellanii str. Neff	1257118	Eukaryota
TRSP32274.t1	Tricho_longreads_scf.00080_261232	hypothetical protein ACA1_171690	148	6.73674e-17	Acanthamoeba castellanii str. Neff	1257118	Eukaryota
TRSP3660.t1	Tricho_longreads_scf.00007_838757	SH2 domain containing protein	531	3.63857e-63	Acanthamoeba castellanii str. Neff	1257118	Eukaryota
TRSP11280.t1	Tricho_longreads_scf.00030_432512	Tyrosine phosphatase	350	9.10636e-50	Acanthamoeba castellanii str. Neff	1257118	Eukaryota
TRSP9030.t1	Tricho_longreads_scf.00050_315752	SAP domain containing protein	471	0.000697472	Acanthamoeba castellanii str. Neff	1257118	Eukaryota
TRSP1865.t1	Tricho_longreads_scf.00039_358812	hypothetical protein ACA1_269310	336	1.9537e-52	Acanthamoeba castellanii str. Neff	1257118	Eukaryota
TRSP1929.t1	Tricho_longreads_scf.00039_358812	transporter, small conductance mechanosensitive ion channel (MscS) family protein	588	3.33798e-19	Acanthamoeba castellanii str. Neff	1257118	Eukaryota
TRSP9744.t1	Tricho_longreads_scf.00004_931448	Twinfilin, putative	486	8.10359e-15	Acanthamoeba castellanii str. Neff	1257118	Eukaryota
TRSP25556.t1	Tricho_longreads_scf.00126_181615	hypothetical protein ACA1_364410	681	3.11539e-10	Acanthamoeba castellanii str. Neff	1257118	Eukaryota
TRSP2616.t1	Tricho_longreads_scf.00095_228964	hypothetical protein ACA1_366370	316	1.03798e-40	Acanthamoeba castellanii str. Neff	1257118	Eukaryota
TRSP18803.t1	Tricho_longreads_scf.00015_607500	CBS domain containing protein-related, putative	483	4.12652e-25	Acanthamoeba castellanii str. Neff	1257118	Eukaryota
TRSP16399.t1	Tricho_longreads_scf.00003_1004824	Histone methylation protein DOT1	2823	3.01e-31	Acanthamoeba castellanii str. Neff	1257118	Eukaryota
TRSP11208.t1	Tricho_longreads_scf.00030_432512	Ubiquitin carboxylterminal hydrolase	798	1.05348e-141	Acanthamoeba castellanii str. Neff	1257118	Eukaryota
TRSP7415.t1	Tricho_longreads_scf.00016_607116	fibronectin type III domain containing protein	572	5.24624e-25	Acanthamoeba castellanii str. Neff	1257118	Eukaryota
TRSP31690.t1	Tricho_longreads_scf.00100_218392	transcriptional regulator, Sir2 family protein	438	4.85624e-74	Acanthamoeba castellanii str. Neff	1257118	Eukaryota
TRSP11874.t1	Tricho_longreads_scf.00090_235661	RhoGEF domain containing protein	892	5.79751e-29	Acanthamoeba castellanii str. Neff	1257118	Eukaryota
TRSP12127.t1	Tricho_longreads_scf.00156_147190	BTB/POZ domain containing protein	460	3.0785e-59	Acanthamoeba castellanii str. Neff	1257118	Eukaryota
TRSP25806.t1	Tricho_longreads_scf.00017_602044	GTPase-activator protein for Ras family GTPase	1825	2.67472e-49	Acanthamoeba castellanii str. Neff	1257118	Eukaryota
TRSP9983.t1	Tricho_longreads_scf.00004_931448	angiotonin transactivated protein 1 isoform 2, putative	212	7.11449e-18	Acanthamoeba castellanii str. Neff	1257118	Eukaryota
TRSP19881.t1	Tricho_longreads_scf.00175_131593	hypothetical protein ACA1_133480	191	1.80715e-11	Acanthamoeba castellanii str. Neff	1257118	Eukaryota
TRSP7548.t1	Tricho_longreads_scf.00016_607116	tetratricopeptide repeat-containing protein	1958	1.1338e-152	Acanthamoeba castellanii str. Neff	1257118	Eukaryota
TRSP27186.t1	Tricho_longreads_scf.00081_260942	hypothetical protein ACA1_112560	515	1.80021e-62	Acanthamoeba castellanii str. Neff	1257118	Eukaryota
TRSP27190.t1	Tricho_longreads_scf.00081_260942	hypothetical protein ACA1_112560	515	1.80021e-62	Acanthamoeba castellanii str. Neff	1257118	Eukaryota
TRSP10144.t1	Tricho_longreads_scf.00042_341914	RhoGEF domain containing protein	541	1.33441e-31	Acanthamoeba castellanii str. Neff	1257118	Eukaryota
TRSP15839.t1	Tricho_longreads_scf.00013_658143	MORN repeatcontaining protein	585	4.87644e-15	Acanthamoeba castellanii str. Neff	1257118	Eukaryota
TRSP21525.t1	Tricho_longreads_scf.00169_138509	PH domain containing protein	586	2.45063e-19	Acanthamoeba castellanii str. Neff	1257118	Eukaryota
TRSP22635.t1	Tricho_longreads_scf.00230_76435	hypothetical protein ACA1_163110	308	4.72696e-22	Acanthamoeba castellanii str. Neff	1257118	Eukaryota
TRSP13961.t1	Tricho_longreads_scf.00001_1255013	2oxoglutarate and iron-dependent oxygenase domain containing 1, putative	440	2.43267e-98	Acanthamoeba castellanii str. Neff	1257118	Eukaryota
TRSP23307.t1	Tricho_longreads_scf.00242_66736	Signal transducer and activator of transcription STAT family protein	613	1.5527e-103	Acanthamoeba castellanii str. Neff	1257118	Eukaryota
TRSP29043.t1	Tricho_longreads_scf.00144_159054	copper/zinc superoxide dismutase	385	6.37027e-52	Acanthamoeba castellanii str. Neff	1257118	Eukaryota
TRSP1937.t1	Tricho_longreads_scf.00039_358812	NB-ARC domain containing protein	616	1.72072e-71	Acanthamoeba castellanii str. Neff	1257118	Eukaryota
TRSP23761.t1	Tricho_longreads_scf.00006_856200	SPRY domain containing protein	1854	2.05532e-76	Acanthamoeba castellanii str. Neff	1257118	Eukaryota
TRSP31398.t1	Tricho_longreads_scf.00070_269880	MORN repeatcontaining protein	202	1.20015e-24	Acanthamoeba castellanii str. Neff	1257118	Eukaryota
TRSP24296.t1	Tricho_longreads_scf.00198_110860	FERM central domain containing protein	501	7.46919e-41	Acanthamoeba castellanii str. Neff	1257118	Eukaryota
TRSP33833.t1	Tricho_longreads_scf.00411_33105	ribonuclease HI, putative	883	1.60651e-31	Acanthamoeba castellanii str. Neff	1257118	Eukaryota
TRSP27018.t1	Tricho_longreads_scf.00127_179609	kelch repeat-containing protein	328	3.57572e-57	Acanthamoeba castellanii str. Neff	1257118	Eukaryota
TRSP7581.t1	Tricho_longreads_scf.00016_607116	hypothetical protein ACA1_208610	629	1.10647e-15	Acanthamoeba castellanii str. Neff	1257118	Eukaryota
TRSP23385.t1	Tricho_longreads_scf.00111_202777	EF hand domain containing protein	300	2.939e-31	Acanthamoeba castellanii str. Neff	1257118	Eukaryota
TRSP42450.t1	Tricho_longreads_scf.00014_642678	Ser/Thr phosphatase family superfamily protein	310	1.6937e-53	Acanthamoeba castellanii str. Neff	1257118	Eukaryota
TRSP4943.t1	Tricho_longreads_scf.00062_284551	SGT1 protein	870	1.70896e-110	Acanthamoeba castellanii str. Neff	1257118	Eukaryota
TRSP9338.t1	Tricho_longreads_scf.00177_128716	LBP / BPI / CETP family, Cterminal domain containing protein	316	2.93795e-38	Acanthamoeba castellanii str. Neff	1257118	Eukaryota
TRSP22765.t1	Tricho_longreads_scf.00023_491334	hypothetical protein ACA1_069460	148	3.54212e-06	Acanthamoeba castellanii str. Neff	1257118	Eukaryota
TRSP39011.t1	Tricho_longreads_scf.00075_266310	ribonuclease HI, putative	1696	1.0917e-54	Acanthamoeba castellanii str. Neff	1257118	Eukaryota
[truncated: 12,025 more rows]

## Sheet: Bacteria
Sequence name	Scaffold_id	Sequence desc.	Sequence length	E-Value	Species	TaxID	Kingdom
[truncated: 5,210 more rows]

## Sheet: Virus
Sequence name	Scaffold_id	Sequence desc.	Sequence length	E-Value	Species	TaxID	Kingdom
[truncated: 1,568 more rows]

[truncated: 1 more sheets: Archaea]
