# Supplementary material for: Omics of an Enigmatic Marine Amoeba Uncovers Unprecedented Gene Trafficking from Giant Viruses and Provides Insights into Its Complex Life Cycle
Source: MDPI journal article supplement (doi:10.3390/microbiolres14020047), 2023-05-18
Supplement: s1 [file s1 › Table_S3_NEW.xlsx]

## Sheet: Sheet1
Table S2. . Putative LGT-derived genes in Trichosphaerium sp. draft genome with Alien Index above threshold (>45) scores. Taxonomic distribution of donors, detection in transcriptome and intron number in gene models are included.
BACTERIA							VIRUSES							ARCHAEA
Gene ID	Alien Index	Description	Dection in Transcriptome	Number of Introns	Potential Donor	Groups	Gene ID	Alien Index	Description	Dection in Transcriptome	Number of Introns	Potential Donor	Group	Gene ID	Alien Index	Description	Dection in Transcriptome	Number of Introns	Potential Donor	Group
TRSP13995.t1	460.517	bifunctional aspartate kinase/homoserine dehydrogenase I	+	15	Persicimonas caeni	Proteobacteria	TRSP10133.t1	121.483	hypothetical protein Harvfovirus8_11	+	1	Harvfovirus sp.	Mimiviridae	TRSP17214.t1	153.238	Ornithine carbamoyltransferase	+	6	Candidatus Lokiarchaeota archaeon	Asgard group
TRSP10093.t1	388.048	bifunctional aspartate kinase/homoserine dehydrogenase I	+	16	Longimonas halophila	FCB group	TRSP12375.t1	113.339	phosphoinositide 3-kinase	+	18	Klosneuvirus KNV1	Mimiviridae	TRSP14451.t1	93.6453	glucose 1-dehydrogenase	+	12	Candidatus Bathyarchaeota archaeon	TACK group
TRSP33012.t1	384.581	S9 family peptidase	+	18	Acidobacteria bacterium	Acidobacteria	TRSP16883.t1	63.2822	hypothetical protein Harvfovirus20_10	+	1	Harvfovirus sp.	Mimiviridae	TRSP28730.t1	93.6453	glucose 1-dehydrogenase	+	12	Candidatus Bathyarchaeota archaeon	TACK group
TRSP11346.t1	320.578	Alpha-xylosidase BoGH31A	+	37	Anaerolineales bacterium	Terrabacteria group	TRSP19347.t1	59.26	F-box domain protein	+	6	Indivirus ILV1	Mimiviridae	TRSP30818.t1	51.7344	tRNA (guanine(10)-N(2))-dimethyltransferase	+	11	Euryarchaeota archaeon	Euryarchaeota
TRSP17852.t1	293.148	argininosuccinate synthase	+	10	Candidatus Peregrinibacteria bacterium	Bacteria candidate phyla	TRSP22855.t1	49.9121	O-methyltransferase	+	4	Fadolivirus 1	unclassified viruses	TRSP12645.t1	47.635	methyltransferase	+	2	Candidatus Woesearchaeota archaeon CG10_big_fil_rev_8_21_14_0_10_37_12	Candidatus Woesearchaeota
TRSP19813.t1	271.482	FAD-dependent oxidoreductase	+	21	Acidimicrobiia bacterium	Terrabacteria group	TRSP28362.t1	98.7332	hypothetical protein Hyperionvirus5_120	+	7	Hyperionvirus sp.	Mimiviridae	TRSP3453.t1	134.249	Aliphatic nitrilase	-	10	Candidatus Heimdallarchaeota archaeon AB_125	Asgard group
TRSP35010.t1	271.433	glycoside hydrolase family 2 protein	+	20	Chthonomonas sp.	Terrabacteria group	TRSP30529.t1	87.6195	hypothetical protein Harvfovirus36_1, partial	+	10	Harvfovirus sp.	Mimiviridae	TRSP14099.t1	123.293	M20/M25/M40 family metallo-hydrolase	-	8	Euryarchaeota archaeon	Euryarchaeota
TRSP32553.t1	265.538	TauD/TfdA family dioxygenase	+	9	Acidobacteria bacterium	Acidobacteria	TRSP32066.t1	53.238	hypothetical protein	+	12	Tupanvirus soda lake	Mimiviridae	TRSP22027.t1	100.31	amidohydrolase family protein	-	10	Candidatus Woesearchaeota archaeon	Candidatus Woesearchaeota
TRSP12359.t1	264.726	alpha-L-rhamnosidase	+	25	Candidatus Solibacter sp.	Acidobacteria	TRSP32299.t1	57.4202	hypothetical protein LCPAC302_00910	+	5	Pithovirus LCPAC302	Pithoviridae	TRSP13265.t1	84.3149	GMC family oxidoreductase N-terminal domain-containing protein	-	10	Halorientalis regularis	Euryarchaeota
TRSP27521.t1	262.044	glycoside hydrolase family 2 protein	+	21	Chthonomonas sp.	Terrabacteria group	TRSP36738.t1	113.738	RNA ligase	+	1	Klosneuvirus KNV1	Mimiviridae	TRSP40436.t1	73.2003	S-adenosylmethionine decarboxylase proenzyme	-	4	Methanocaldococcus sp. SG7	Euryarchaeota
TRSP40395.t1	248.858	FAD-containing oxidoreductase	+	29	Desulforhopalus sp.	Proteobacteria	TRSP10435.t1	85.4079	hypothetical protein Harvfovirus3_55	+	0	Harvfovirus sp.	Mimiviridae	TRSP20306.t1	64.3354	hypothetical protein	-	1	Nitrosopumilus sp.	TACK group
TRSP32224.t1	235.225	DUF5060 domain-containing protein	+	12	Planctomycetes bacterium	PVC group	TRSP14781.t1	47.4182	hypothetical protein Hyperionvirus6_11	+	0	Hyperionvirus sp.	Mimiviridae	TRSP5738.t1	59.6026	D-glycerate dehydrogenase	-	11	Euryarchaeota archaeon	Euryarchaeota
TRSP13522.t1	230.076	class I SAM-dependent methyltransferase	+	15	Verrucomicrobia bacterium	PVC group	TRSP14857.t1	59.8089	hypothetical protein Harvfovirus5_25	+	0	Harvfovirus sp.	Mimiviridae	TRSP37913.t1	59.3916	D-glycerate dehydrogenase	-	10	Euryarchaeota archaeon	Euryarchaeota
TRSP37947.t1	225.317	galactosylceramidase	+	16	Verrucomicrobia bacterium	PVC group	TRSP16013.t1	45.8447	hypothetical protein Hyperionvirus4_148	+	0	Hyperionvirus sp.	Mimiviridae	TRSP19163.t1	58.3366	hypothetical protein	-	0	Sulfolobus islandicus M.14.25	TACK group
TRSP44123.t1	216.011	M24 family metallopeptidase	+	10	Gammaproteobacteria bacterium LSUCC0112	Proteobacteria	TRSP20321.t1	152.249	hypothetical protein	+	0	Tupanvirus soda lake	Mimiviridae	TRSP23204.t1	56.8163	hypothetical protein	-	0	Nitrosopumilus sp.	TACK group
TRSP32241.t1	205.675	sulfatase	+	15	Pyrinomonadaceae bacterium	Acidobacteria	TRSP20369.t1	108.225	hypothetical protein	+	0	Tupanvirus soda lake	Mimiviridae	TRSP14022.t1	49.6132	hypothetical protein	-	0	Nitrosopumilus sp.	TACK group
TRSP14135.t1	204.7	cysteine desulfurase-like protein	+	13	Bacteroidetes bacterium	FCB group	TRSP20597.t1	66.4935	hypothetical protein Harvfovirus36_1, partial	+	0	Harvfovirus sp.	Mimiviridae	TRSP31738.t1	48.64	hypothetical protein	-	0	Nitrosopumilus sp.	TACK group
TRSP21069.t1	201.058	1,4-beta-xylanase	+	7	Cyanobacteria bacterium UBA11369	Terrabacteria group	TRSP21794.t1	122.659	hypothetical protein Catovirus_1_561	+	0	Catovirus CTV1	Mimiviridae	TRSP43821.t1	47.4945	hypothetical protein	-	0	Nitrosopumilus sp.	TACK group
TRSP31811.t1	195.951	1,4-beta-xylanase	+	8	Cyanobacteria bacterium UBA11369	Terrabacteria group	TRSP22708.t1	69.04	hypothetical protein	+	0	Tupanvirus soda lake	Mimiviridae	TRSP5271.t1	45.1156	glycoside hydrolase family 140 protein	-	5	Candidatus Brockarchaeota archaeon	TACK group
TRSP8751.t1	189.726	sulfatase	+	23	Symmachiella dynata	PVC group	TRSP29893.t1	47.1818	hypothetical protein Harvfovirus30_3	+	0	Harvfovirus sp.	Mimiviridae
TRSP12920.t1	179.584	adenylyltransferase/cytidyltransferase family protein	+	12	Planctomycetaceae bacterium	PVC group	TRSP34214.t1	150.82	hypothetical protein	+	0	Tupanvirus soda lake	Mimiviridae
TRSP6095.t1	156.244	glycoside hydrolase family 3 C-terminal domain-containing protein	+	15	Tengunoibacter tsumagoiensis	Terrabacteria group	TRSP35679.t1	52.5398	hypothetical protein Hyperionvirus2_165	+	0	Hyperionvirus sp.	Mimiviridae
TRSP16267.t1	151.952	aminotransferase class III-fold pyridoxal phosphate-dependent enzyme	+	29	bacterium	unclassified bacteria	TRSP43406.t1	61.1902	hypothetical protein Harvfovirus36_1, partial	+	0	Harvfovirus sp.	Mimiviridae
TRSP45151.t1	143.745	peroxidase	+	8	Solirubrobacterales bacterium	Terrabacteria group	TRSP8532.t1	92.1484	hypothetical protein Harvfovirus36_1, partial	+	0	Harvfovirus sp.	Mimiviridae
TRSP20274.t1	142.8	Animal haem peroxidase	+	6	Nitrosomonas aestuarii	Proteobacteria	TRSP8727.t1	85.6455	hypothetical protein Hyperionvirus6_11	+	0	Hyperionvirus sp.	Mimiviridae
TRSP24541.t1	142.103	DUF5060 domain-containing protein	+	6	Acidobacteria bacterium	Acidobacteria	TRSP9049.t1	92.2267	hypothetical protein Hyperionvirus6_11	+	0	Hyperionvirus sp.	Mimiviridae
TRSP28875.t1	135.922	carbon-nitrogen hydrolase family protein	+	6	bacterium	unclassified bacteria	TRSP10232.t1	159.566	hypothetical protein Hyperionvirus5_120	-	2	Hyperionvirus sp.	Mimiviridae
TRSP9850.t1	127.266	hypothetical protein	+	44	Cyanothece sp. PCC 7425	Terrabacteria group	TRSP10276.t1	86.3246	F-box domain protein	-	2	Indivirus ILV1	Mimiviridae
TRSP11193.t1	123.667	cellulose 1,4-beta-cellobiosidase	+	7	Deltaproteobacteria bacterium	Proteobacteria	TRSP10523.t1	51.307	F-box domain protein	-	1	Indivirus ILV1	Mimiviridae
TRSP11810.t1	123.667	cellulose 1,4-beta-cellobiosidase	+	7	Deltaproteobacteria bacterium	Proteobacteria	TRSP10563.t1	85.382	metal dependent phosphohydrolase	-	3	Marseillevirus LCMAC101	unclassified Marseilleviridae
TRSP42654.t1	123.667	cellulose 1,4-beta-cellobiosidase	+	7	Deltaproteobacteria bacterium	Proteobacteria	TRSP10571.t1	149.159	hypothetical protein Hyperionvirus5_120	-	1	Hyperionvirus sp.	Mimiviridae
TRSP40647.t1	123.126	putative epimerase/dehydratase	+	10	bacterium MnTg02	unclassified bacteria	TRSP10582.t1	102.607	hypothetical protein Harvfovirus8_11	-	1	Harvfovirus sp.	Mimiviridae
TRSP32328.t1	115.636	aquaporin	+	16	Chloroflexi bacterium	Terrabacteria group	TRSP10599.t1	123.279	hypothetical protein	-	1	Tupanvirus soda lake	Mimiviridae
TRSP9923.t1	103.567	SDR family oxidoreductase	+	8	Deltaproteobacteria bacterium	Proteobacteria	TRSP10688.t1	111.823	hypothetical protein Harvfovirus20_10	-	1	Harvfovirus sp.	Mimiviridae
TRSP24889.t1	98.9939	dehydrogenase of unknown specificity, short-chain alcohol dehydrogenase like protein	+	6	Singulisphaera acidiphila DSM 18658	PVC group	TRSP10757.t1	51.8635	hypothetical protein Harvfovirus20_10	-	1	Harvfovirus sp.	Mimiviridae
TRSP22061.t1	95.9525	hypothetical protein DME50_17300	+	3	Verrucomicrobia bacterium	PVC group	TRSP11020.t1	77.6728	hypothetical protein Hyperionvirus6_11	-	1	Hyperionvirus sp.	Mimiviridae
TRSP11164.t1	95.6129	DUF1295 domain-containing protein	+	5	Myxococcales bacterium	Proteobacteria	TRSP11099.t1	48.4667	hypothetical protein	-	2	Tupanvirus soda lake	Mimiviridae
TRSP7198.t1	93.3889	polyprenyl synthetase family protein	+	7	Planctomycetes bacterium	PVC group	TRSP11206.t1	53.0996	hypothetical protein Hyperionvirus2_165	-	1	Hyperionvirus sp.	Mimiviridae
TRSP21207.t1	89.6504	hypothetical protein D6723_09180	+	12	Acidobacteria bacterium	Acidobacteria	TRSP11220.t1	90.4547	hypothetical protein Hyperionvirus5_103	-	1	Hyperionvirus sp.	Mimiviridae
TRSP29596.t1	89.6504	hypothetical protein D6723_09180	+	12	Acidobacteria bacterium	Acidobacteria	TRSP11227.t1	97.2	hypothetical protein Harvfovirus8_11	-	1	Harvfovirus sp.	Mimiviridae
TRSP6324.t1	87.7682	FGGY-family carbohydrate kinase	+	11	Planctomycetes bacterium	PVC group	TRSP11237.t1	54.671	F-box domain protein	-	3	Indivirus ILV1	Mimiviridae
TRSP22756.t1	86.4655	pyridoxal phosphate-dependent aminotransferase	+	5	Anaerolineales bacterium	Terrabacteria group	TRSP11309.t1	124.643	RNA ligase	-	2	Pacmanvirus A23	unclassified viruses
TRSP16160.t1	84.4117	glucose sorbosone dehydrogenase	+	20	Candidatus Dadabacteria bacterium	Bacteria candidate phyla	TRSP11358.t1	85.2391	hypothetical protein Harvfovirus30_3	-	1	Harvfovirus sp.	Mimiviridae
TRSP28849.t1	81.7911	hypothetical protein AUG12_00080	+	6	Acidobacteria bacterium 13_1_20CM_2_57_8	Acidobacteria	TRSP1140.t1	134.71	hypothetical protein Harvfovirus8_11	-	9	Harvfovirus sp.	Mimiviridae
TRSP44763.t1	79.9807	dimethylargininase	+	6	Oligoflexus tunisiensis	Proteobacteria	TRSP115.t1	97.5157	hypothetical protein Harvfovirus8_11	-	1	Harvfovirus sp.	Mimiviridae
TRSP12754.t1	78.4801	hypothetical protein	+	17	Planctomycetes bacterium	PVC group	TRSP11701.t1	58.0646	F-box domain protein	-	2	Indivirus ILV1	Mimiviridae
TRSP17501.t1	78.253	SDR family oxidoreductase	+	10	Chloroflexi bacterium	Terrabacteria group	TRSP11768.t1	79.9175	hypothetical protein Harvfovirus20_10	-	4	Harvfovirus sp.	Mimiviridae
TRSP32755.t1	77.536	Gfo/Idh/MocA family oxidoreductase	+	7	Chloroflexi bacterium	Terrabacteria group	TRSP11876.t1	107.412	hypothetical protein Harvfovirus8_11	-	12	Harvfovirus sp.	Mimiviridae
TRSP21076.t1	77.3401	heme-binding protein	+	4	Proteobacteria bacterium	Proteobacteria	TRSP11916.t1	120.737	hypothetical protein Harvfovirus36_1, partial	-	1	Harvfovirus sp.	Mimiviridae
TRSP6252.t1	76.7615	DUF1538 domain-containing protein	+	27	Gammaproteobacteria bacterium	Proteobacteria	TRSP11927.t1	85.2156	hypothetical protein Harvfovirus30_3	-	1	Harvfovirus sp.	Mimiviridae
TRSP39434.t1	74.8456	hypothetical protein	+	8	candidate division Zixibacteria bacterium	FCB group	TRSP1212.t1	101.023	hypothetical protein Harvfovirus8_11	-	2	Harvfovirus sp.	Mimiviridae
TRSP15538.t1	74.6277	bifunctional folylpolyglutamate synthase/dihydrofolate synthase	+	8	Cylindrospermopsis raciborskii GIHE 2018	Terrabacteria group	TRSP12178.t1	105.131	hypothetical protein Hyperionvirus5_103	-	1	Hyperionvirus sp.	Mimiviridae
TRSP29050.t1	73.6916	MULTISPECIES: D-amino-acid transaminase	+	6	Bacillus sp. VT-16-64	Terrabacteria group	TRSP12287.t1	46.3308	hypothetical protein Hyperionvirus6_11	-	10	Hyperionvirus sp.	Mimiviridae
TRSP4139.t1	71.9982	thioredoxin family protein	+	2	Anaerolineae bacterium	Terrabacteria group	TRSP12769.t1	106.612	hypothetical protein Harvfovirus3_55	-	1	Harvfovirus sp.	Mimiviridae
TRSP4169.t1	71.9283	putative alginate lyase	+	13	Lyngbya aestuarii BL J	Terrabacteria group	TRSP12830.t1	90.9705	hypothetical protein Hyperionvirus1_126	-	1	Hyperionvirus sp.	Mimiviridae
TRSP35417.t1	70.7324	ribosome biogenesis GTPase Der	+	11	Anaerolineae bacterium	Terrabacteria group	TRSP13286.t1	74.3728	hypothetical protein Hyperionvirus2_165	-	1	Hyperionvirus sp.	Mimiviridae
TRSP4809.t1	70.3256	homocysteine S-methyltransferase family protein	+	6	Alphaproteobacteria bacterium	Proteobacteria	TRSP13364.t1	83.1581	hypothetical protein Hyperionvirus1_126	-	2	Hyperionvirus sp.	Mimiviridae
TRSP6185.t1	70.3256	homocysteine S-methyltransferase family protein	+	6	Alphaproteobacteria bacterium	Proteobacteria	TRSP13413.t1	77.5535	F-box domain protein	-	1	Indivirus ILV1	Mimiviridae
TRSP30619.t1	69.7382	SDR family NAD(P)-dependent oxidoreductase	+	3	Microvirga mediterraneensis	Proteobacteria	TRSP13416.t1	93.4597	hypothetical protein Harvfovirus3_55	-	1	Harvfovirus sp.	Mimiviridae
TRSP1246.t1	69.513	hypothetical protein	+	16	Cyanobacteria bacterium UBA11372	Terrabacteria group	TRSP13475.t1	89.2785	hypothetical protein Hyperionvirus5_103	-	1	Hyperionvirus sp.	Mimiviridae
TRSP22757.t1	68.6391	right-handed parallel beta-helix repeat-containing protein	+	34	Sporocytophaga myxococcoides	FCB group	TRSP13573.t1	102.161	hypothetical protein Harvfovirus8_11	-	1	Harvfovirus sp.	Mimiviridae
TRSP21098.t1	67.669	heme-binding protein	+	5	Cyanobacteria bacterium SZAS LIN-5	Terrabacteria group	TRSP13578.t1	65.4188	hypothetical protein Hyperionvirus1_152	-	3	Hyperionvirus sp.	Mimiviridae
TRSP21941.t1	67.4642	homocysteine S-methyltransferase family protein	+	7	Alphaproteobacteria bacterium	Proteobacteria	TRSP13602.t1	157.625	hypothetical protein Harvfovirus20_10	-	1	Harvfovirus sp.	Mimiviridae
TRSP18457.t1	67.3569	RluA family pseudouridine synthase	+	7	Leptolyngbya sp. FACHB-671	Terrabacteria group	TRSP13690.t1	101.901	hypothetical protein Hyperionvirus6_11	-	1	Hyperionvirus sp.	Mimiviridae
TRSP10682.t1	65.5562	oligopeptide transporter, OPT family	+	24	Betaproteobacteria bacterium RIFCSPLOWO2_12_FULL_63_13	Proteobacteria	TRSP13691.t1	51.872	hypothetical protein Harvfovirus8_11	-	7	Harvfovirus sp.	Mimiviridae
TRSP39744.t1	62.4344	tRNA pseudouridine synthase TruC	+	6	Planctomycetes bacterium SRT547	PVC group	TRSP13740.t1	60.417	F-box domain protein	-	1	Indivirus ILV1	Mimiviridae
TRSP7761.t1	60.9937	methyltransferase domain-containing protein	+	7	Pseudomonadales bacterium	Proteobacteria	TRSP13785.t1	64.2294	hypothetical protein Harvfovirus20_10	-	1	Harvfovirus sp.	Mimiviridae
TRSP24396.t1	60.5731	tRNA pseudouridine synthase TruC	+	6	Planctomycetes bacterium SRT547	PVC group	TRSP13790.t1	105.337	hypothetical protein Harvfovirus8_11	-	1	Harvfovirus sp.	Mimiviridae
TRSP32327.t1	59.4784	aquaporin	+	10	Chloroflexi bacterium	Terrabacteria group	TRSP13877.t1	197.9	alpha-L-rhamnosidase	-	11	Hyperionvirus sp.	Mimiviridae
TRSP17841.t1	57.3509	tetratricopeptide repeat protein	+	8	bacterium	unclassified bacteria	TRSP13904.t1	158.193	hypothetical protein	-	1	Tupanvirus soda lake	Mimiviridae
TRSP10798.t1	57.2526	class I SAM-dependent methyltransferase	+	5	Nitrospira sp.	unclassified bacteria	TRSP14160.t1	177.719	hypothetical protein Harvfovirus20_10	-	1	Harvfovirus sp.	Mimiviridae
TRSP29665.t1	56.8607	PE-PGRS family protein	+	15	Acidobacteria bacterium	Acidobacteria	TRSP14362.t1	101.75	hypothetical protein Hyperionvirus5_103	-	1	Hyperionvirus sp.	Mimiviridae
TRSP28612.t1	56.4495	septum site-determining protein MinC	+	7	Methylomonas rhizoryzae	Proteobacteria	TRSP14454.t1	142.379	hypothetical protein Harvfovirus20_10	-	3	Harvfovirus sp.	Mimiviridae
TRSP31148.t1	56.0898	carotenoid oxygenase family protein	+	16	Planktothricoides sp. SR001	Terrabacteria group	TRSP14513.t1	85.2811	F-box domain protein	-	1	Indivirus ILV1	Mimiviridae
TRSP793.t1	55.9413	cyclic 3',5'-adenosine monophosphate phosphodiesterase	+	7	Acidobacteria bacterium	Acidobacteria	TRSP14529.t1	60.7631	hypothetical protein Hyperionvirus5_103	-	1	Hyperionvirus sp.	Mimiviridae
TRSP17525.t1	55.5905	DUF1593 domain-containing protein	+	24	Lignipirellula cremea	PVC group	TRSP14751.t1	87.6036	hypothetical protein	-	1	Tupanvirus soda lake	Mimiviridae
TRSP28755.t1	54.2444	PE-PGRS family protein	+	8	Acidobacteria bacterium	Acidobacteria	TRSP14964.t1	58.8326	hypothetical protein Harvfovirus36_1, partial	-	1	Harvfovirus sp.	Mimiviridae
TRSP30826.t1	52.4959	amidinotransferase	+	6	Deltaproteobacteria bacterium	Proteobacteria	TRSP15122.t1	48.9949	F-box domain protein	-	2	Indivirus ILV1	Mimiviridae
TRSP30096.t1	52.1987	hypothetical protein DCF25_14130	+	5	Leptolyngbya foveolarum	Terrabacteria group	TRSP15203.t1	51.0686	hypothetical protein Harvfovirus36_1, partial	-	1	Harvfovirus sp.	Mimiviridae
TRSP790.t1	51.7367	SDR family NAD(P)-dependent oxidoreductase	+	2	Microvirga mediterraneensis	Proteobacteria	TRSP15236.t1	194.091	hypothetical protein Harvfovirus3_55	-	1	Harvfovirus sp.	Mimiviridae
TRSP13081.t1	51.3369	aquaporin	+	10	Dehalococcoidia bacterium	Terrabacteria group	TRSP15246.t1	105.037	hypothetical protein	-	1	Tupanvirus soda lake	Mimiviridae
TRSP13082.t1	50.1538	aquaporin	+	10	Dehalococcoidia bacterium	Terrabacteria group	TRSP15258.t1	53.5894	hypothetical protein Harvfovirus14_7	-	6	Harvfovirus sp.	Mimiviridae
TRSP28231.t1	49.6131	metallophosphoesterase	+	14	Planctomycetes bacterium	PVC group	TRSP15439.t1	59.9681	hypothetical protein Hyperionvirus6_11	-	1	Hyperionvirus sp.	Mimiviridae
TRSP29694.t1	49.3704	peptidase	+	15	bacterium	unclassified bacteria	TRSP15469.t1	77.6184	hypothetical protein Hyperionvirus1_126	-	1	Hyperionvirus sp.	Mimiviridae
TRSP41992.t1	47.5568	hypothetical protein	+	4	Alphaproteobacteria bacterium	Proteobacteria	TRSP15495.t1	132.854	hypothetical protein Harvfovirus20_10	-	1	Harvfovirus sp.	Mimiviridae
TRSP35770.t1	46.8413	hypothetical protein D6796_08495	+	13	Caldilineae bacterium	Terrabacteria group	TRSP15531.t1	66.7256	hypothetical protein Hyperionvirus1_152	-	2	Hyperionvirus sp.	Mimiviridae
TRSP25803.t1	45.8883	D-cysteine desulfhydrase family protein	+	11	Candidatus Schekmanbacteria bacterium	Bacteria candidate phyla	TRSP15634.t1	157.168	hypothetical protein Harvfovirus20_10	-	1	Harvfovirus sp.	Mimiviridae
TRSP19966.t1	45.6579	alpha/beta hydrolase	+	4	Anaerolineales bacterium	Terrabacteria group	TRSP15821.t1	118.025	hypothetical protein	-	1	Tupanvirus soda lake	Mimiviridae
TRSP44528.t1	45.2816	mismatch-specific DNA-glycosylase	+	6	Chloroflexi bacterium	Terrabacteria group	TRSP15831.t1	73.4886	F-box domain protein	-	1	Indivirus ILV1	Mimiviridae
TRSP13628.t1	460.517	hypothetical protein	-	20	Sedimentisphaerales bacterium	PVC group	TRSP15868.t1	134.734	hypothetical protein Harvfovirus20_10	-	1	Harvfovirus sp.	Mimiviridae
TRSP28766.t1	460.517	hypothetical protein	-	20	Sedimentisphaerales bacterium	PVC group	TRSP15946.t1	132.125	hypothetical protein Hyperionvirus5_103	-	1	Hyperionvirus sp.	Mimiviridae
TRSP36814.t1	427.741	bifunctional aldolase/short-chain dehydrogenase	-	18	Nitrospinae bacterium	unclassified bacteria	TRSP16043.t1	149.761	hypothetical protein Harvfovirus8_11	-	1	Harvfovirus sp.	Mimiviridae
TRSP34523.t1	333.43	aminotransferase class I/II-fold pyridoxal phosphate-dependent enzyme	-	14	Brevibacillus migulae	Terrabacteria group	TRSP16130.t1	113.219	hypothetical protein Harvfovirus8_11	-	1	Harvfovirus sp.	Mimiviridae
TRSP27981.t1	313.55	L-lysine 6-transaminase	-	8	bacterium	unclassified bacteria	TRSP16200.t1	73.693	hypothetical protein Hyperionvirus6_11	-	1	Hyperionvirus sp.	Mimiviridae
TRSP29536.t1	313.351	family 78 glycoside hydrolase catalytic domain	-	18	Verrucomicrobia bacterium ADurb.Bin118	PVC group	TRSP1621.t1	147.705	hypothetical protein Harvfovirus8_11	-	2	Harvfovirus sp.	Mimiviridae
TRSP23945.t1	311.488	DUF3179 domain-containing protein	-	9	Candidatus Dadabacteria bacterium	Bacteria candidate phyla	TRSP16292.t1	56.4242	hypothetical protein	-	1	Tupanvirus soda lake	Mimiviridae
TRSP44566.t1	300.901	DUF5060 domain-containing protein	-	13	Planctomycetes bacterium	PVC group	TRSP16317.t1	171.725	hypothetical protein	-	1	Tupanvirus soda lake	Mimiviridae
TRSP22796.t1	300.834	primary-amine oxidase	-	47	Romeria aff. gracilis LEGE 07310	Terrabacteria group	TRSP16370.t1	111.855	hypothetical protein Harvfovirus8_11	-	1	Harvfovirus sp.	Mimiviridae
TRSP29553.t1	295.143	glycoside hydrolase family 2	-	19	Sedimentisphaera cyanobacteriorum	PVC group	TRSP16433.t1	91.5053	hypothetical protein Harvfovirus3_55	-	2	Harvfovirus sp.	Mimiviridae
TRSP32229.t1	295	DUF5060 domain-containing protein	-	12	Planctomycetes bacterium	PVC group	TRSP16443.t1	102.523	hypothetical protein Hyperionvirus5_120	-	1	Hyperionvirus sp.	Mimiviridae
TRSP26024.t1	291.658	DUF5060 domain-containing protein	-	14	Planctomycetes bacterium	PVC group	TRSP16682.t1	72.1401	hypothetical protein Hyperionvirus2_165	-	1	Hyperionvirus sp.	Mimiviridae
TRSP37690.t1	291.02	DUF5060 domain-containing protein	-	14	Planctomycetes bacterium	PVC group	TRSP16718.t1	174.734	hypothetical protein Harvfovirus8_11	-	1	Harvfovirus sp.	Mimiviridae
TRSP24246.t1	289.555	DUF5060 domain-containing protein	-	14	Planctomycetes bacterium	PVC group	TRSP16733.t1	48.0001	hypothetical protein Harvfovirus8_11	-	1	Harvfovirus sp.	Mimiviridae
TRSP39047.t1	287.745	alpha/beta hydrolase	-	15	Chloroflexi bacterium	Terrabacteria group	TRSP16919.t1	158.902	hypothetical protein Harvfovirus8_11	-	1	Harvfovirus sp.	Mimiviridae
TRSP36715.t1	280.163	hypothetical protein	-	13	Xanthomonadaceae bacterium	Proteobacteria	TRSP16973.t1	68.8466	F-box domain protein	-	3	Indivirus ILV1	Mimiviridae
TRSP13934.t1	276.34	hypothetical protein	-	9	Sedimentisphaerales bacterium	PVC group	TRSP16981.t1	192.611	hypothetical protein Harvfovirus20_10	-	1	Harvfovirus sp.	Mimiviridae
TRSP10114.t1	272.265	dihydroxy-acid dehydratase	-	14	Planctomycetaceae bacterium TMED10	PVC group	TRSP17037.t1	148.969	hypothetical protein Hyperionvirus5_120	-	1	Hyperionvirus sp.	Mimiviridae
TRSP21267.t1	271.519	S8 family serine peptidase	-	4	Candidatus Aminicenantes bacterium	Bacteria candidate phyla	TRSP17058.t1	137.259	hypothetical protein	-	1	Tupanvirus soda lake	Mimiviridae
TRSP34209.t1	269.819	threonine synthase	-	11	Litorilinea aerophila	Terrabacteria group	TRSP1707.t1	60.6203	F-box domain protein	-	3	Indivirus ILV1	Mimiviridae
TRSP21706.t1	267.112	M14 family metallocarboxypeptidase	-	0	Vibrio harveyi	Proteobacteria	TRSP1713.t1	82.4231	hypothetical protein Harvfovirus5_25	-	2	Harvfovirus sp.	Mimiviridae
TRSP40341.t1	267.08	AGE family epimerase/isomerase	-	19	Nodularia sp. LEGE 06071	Terrabacteria group	TRSP17173.t1	111.779	hypothetical protein Harvfovirus8_11	-	1	Harvfovirus sp.	Mimiviridae
TRSP3499.t1	263.795	M14 family metallocarboxypeptidase	-	11	Vibrio harveyi	Proteobacteria	TRSP17203.t1	49.0987	hypothetical protein Hyperionvirus2_165	-	17	Hyperionvirus sp.	Mimiviridae
TRSP44568.t1	255.932	cyanophycin synthetase	-	21	Blastocatellia bacterium	Acidobacteria	TRSP17239.t1	99.1833	hypothetical protein Hyperionvirus5_120	-	3	Hyperionvirus sp.	Mimiviridae
TRSP7883.t1	246.794	D-aminoacylase	-	11	Gammaproteobacteria bacterium	Proteobacteria	TRSP17394.t1	84.0792	hypothetical protein	-	1	Tupanvirus soda lake	Mimiviridae
TRSP26207.t1	240.773	SDR family oxidoreductase	-	2	Marinomonas pollencensis	Proteobacteria	TRSP17416.t1	210.396	hypothetical protein Harvfovirus20_10	-	2	Harvfovirus sp.	Mimiviridae
TRSP11127.t1	239.537	DNA helicase PcrA	-	16	Bacillus cohnii	Terrabacteria group	TRSP17487.t1	88.7909	hypothetical protein Harvfovirus8_11	-	16	Harvfovirus sp.	Mimiviridae
TRSP16604.t1	239.031	alpha-L-glutamate ligase	-	6	Pradoshia eiseniae	Terrabacteria group	TRSP17608.t1	151.507	hypothetical protein	-	1	Tupanvirus soda lake	Mimiviridae
TRSP26029.t1	238.921	hypothetical protein D6675_02145, partial	-	7	Gemmatimonadetes bacterium	FCB group	TRSP17618.t1	124.591	hypothetical protein Harvfovirus20_10	-	1	Harvfovirus sp.	Mimiviridae
TRSP39587.t1	234.52	hypothetical protein D6675_02145, partial	-	8	Gemmatimonadetes bacterium	FCB group	TRSP17632.t1	103.231	hypothetical protein Harvfovirus36_1, partial	-	2	Harvfovirus sp.	Mimiviridae
TRSP5626.t1	234.52	hypothetical protein D6675_02145, partial	-	8	Gemmatimonadetes bacterium	FCB group	TRSP1771.t1	51.9042	F-box domain protein	-	1	Indivirus ILV1	Mimiviridae
TRSP20065.t1	232.784	M3 family metallopeptidase	-	17	Gimesia fumaroli	PVC group	TRSP1776.t1	226.948	hypothetical protein Harvfovirus20_10	-	3	Harvfovirus sp.	Mimiviridae
TRSP1145.t1	226.853	phosphoribosylaminoimidazolesuccinocarboxamide synthase	-	7	Candidatus Marinimicrobia bacterium	FCB group	TRSP18014.t1	70.5546	F-box domain protein	-	1	Indivirus ILV1	Mimiviridae
TRSP25925.t1	223.978	endopolygalacturonase	-	8	Cyanobacteria bacterium UBA11049	Terrabacteria group	TRSP18079.t1	89.2913	hypothetical protein Hyperionvirus1_57	-	1	Hyperionvirus sp.	Mimiviridae
TRSP17426.t1	222.558	galactosylceramidase	-	17	Verrucomicrobia bacterium	PVC group	TRSP18158.t1	87.2559	hypothetical protein Hyperionvirus1_57	-	1	Hyperionvirus sp.	Mimiviridae
TRSP25817.t1	222.53	MBL fold metallo-hydrolase	-	10	Rufibacter sp. SYSU D00434	FCB group	TRSP1817.t1	53.5087	hypothetical protein Harvfovirus14_7	-	4	Harvfovirus sp.	Mimiviridae
TRSP27715.t1	215.192	hypothetical protein	-	11	Dictyobacter vulcani	Terrabacteria group	TRSP18301.t1	124.429	hypothetical protein Harvfovirus8_11	-	1	Harvfovirus sp.	Mimiviridae
TRSP42620.t1	214.354	aldehyde dehydrogenase family protein	-	15	Deltaproteobacteria bacterium	Proteobacteria	TRSP1835.t1	134.519	hypothetical protein Harvfovirus20_10	-	1	Harvfovirus sp.	Mimiviridae
TRSP2600.t1	204.723	DUF1479 family protein	-	11	Mycobacterium sp. KBS0706	Terrabacteria group	TRSP18355.t1	77.3681	hypothetical protein Harvfovirus36_1, partial	-	1	Harvfovirus sp.	Mimiviridae
TRSP12657.t1	200.511	aspartate/glutamate racemase family protein	-	1	Candidatus Saccharibacteria bacterium	Bacteria candidate phyla	TRSP1857.t1	79.7464	F-box domain protein	-	1	Indivirus ILV1	Mimiviridae
TRSP29170.t1	200.49	aspartate/glutamate racemase family protein	-	1	Candidatus Saccharibacteria bacterium	Bacteria candidate phyla	TRSP18766.t1	169.455	hypothetical protein Harvfovirus20_10	-	1	Harvfovirus sp.	Mimiviridae
TRSP16926.t1	195.58	NAD(P)-binding domain-containing protein	-	11	Planctopirus limnophila DSM 3776	PVC group	TRSP1882.t1	213.522	hypothetical protein Harvfovirus3_55	-	1	Harvfovirus sp.	Mimiviridae
TRSP19487.t1	195.042	hypothetical protein	-	5	Verrucomicrobia subdivision 3 bacterium	PVC group	TRSP18990.t1	96.4253	hypothetical protein Hyperionvirus5_103	-	1	Hyperionvirus sp.	Mimiviridae
TRSP14373.t1	192.807	hypothetical protein	-	3	Synechococcales cyanobacterium C42_A2020_086	Terrabacteria group	TRSP19028.t1	105.781	leucine-rich repeat protein	-	1	Pithovirus LCPAC101	Pithoviridae
TRSP20822.t1	191.087	gamma-glutamyltransferase	-	16	Verrucomicrobia bacterium	PVC group	TRSP19118.t1	96.8385	hypothetical protein Harvfovirus8_11	-	1	Harvfovirus sp.	Mimiviridae
TRSP20424.t1	188.144	DUF4147 domain-containing protein	-	5	Desulfobacteraceae bacterium	Proteobacteria	TRSP19146.t1	159.373	hypothetical protein Harvfovirus3_55	-	1	Harvfovirus sp.	Mimiviridae
TRSP12841.t1	187.984	alcohol dehydrogenase	-	14	Bacteroidetes bacterium 37-13	FCB group	TRSP19251.t1	63.541	hypothetical protein Catovirus_1_560	-	1	Catovirus CTV1	Mimiviridae
TRSP37968.t1	187.984	alcohol dehydrogenase	-	14	Bacteroidetes bacterium 37-13	FCB group	TRSP19335.t1	98.4572	hypothetical protein Harvfovirus8_11	-	1	Harvfovirus sp.	Mimiviridae
TRSP7856.t1	186.384	choice-of-anchor B family protein	-	22	Woeseiaceae bacterium	Proteobacteria	TRSP19470.t1	145.511	hypothetical protein Harvfovirus8_11	-	1	Harvfovirus sp.	Mimiviridae
TRSP18859.t1	185.577	L-histidine N(alpha)-methyltransferase	-	8	Myxococcales bacterium	Proteobacteria	TRSP19710.t1	189.957	hypothetical protein Harvfovirus20_10	-	1	Harvfovirus sp.	Mimiviridae
TRSP29672.t1	185.407	cation diffusion facilitator CzcD-associated flavoprotein CzcO	-	8	Parvibaculum indicum	Proteobacteria	TRSP19758.t1	60.7046	F-box domain protein	-	1	Indivirus ILV1	Mimiviridae
TRSP7763.t1	179.469	amidohydrolase	-	12	Rhodothermus marinus	FCB group	TRSP19778.t1	58.3302	hypothetical protein Harvfovirus20_10	-	3	Harvfovirus sp.	Mimiviridae
TRSP28346.t1	179.411	FAD-binding oxidoreductase	-	10	Deltaproteobacteria bacterium	Proteobacteria	TRSP19832.t1	86.6854	hypothetical protein Harvfovirus30_3	-	1	Harvfovirus sp.	Mimiviridae
TRSP11082.t1	176.408	formylglycine-generating enzyme family protein	-	10	Verrucomicrobia bacterium S94	PVC group	TRSP19838.t1	90.3049	hypothetical protein	-	1	Tupanvirus soda lake	Mimiviridae
TRSP7210.t1	175.829	hypothetical protein A2X01_02815	-	4	Bacteroidales bacterium	FCB group	TRSP19862.t1	86.7555	hypothetical protein Hyperionvirus5_103	-	1	Hyperionvirus sp.	Mimiviridae
TRSP16581.t1	175.255	haloalkane dehalogenase	-	5	Salinisphaera sp. LB1	Proteobacteria	TRSP19946.t1	142.53	hypothetical protein	-	2	Tupanvirus soda lake	Mimiviridae
TRSP29463.t1	171.16	branched-chain amino acid ABC transporter substrate-binding protein	-	9	Azospirillum sp. TSO22-1	Proteobacteria	TRSP19962.t1	83.2805	hypothetical protein Harvfovirus8_11	-	1	Harvfovirus sp.	Mimiviridae
TRSP19839.t1	170.709	hypothetical protein	-	26	Symploca sp. SIO2E9	Terrabacteria group	TRSP19987.t1	106.404	hypothetical protein Harvfovirus8_11	-	1	Harvfovirus sp.	Mimiviridae
TRSP39439.t1	170.209	gluconate:H+ symporter	-	12	Thermosipho sp. JL129W03	unclassified bacteria	TRSP20000.t1	52.293	F-box domain protein	-	4	Indivirus ILV1	Mimiviridae
TRSP31345.t1	165.887	endo alpha-1,4 polygalactosaminidase	-	5	Cellvibrionales bacterium	Proteobacteria	TRSP20002.t1	91.6196	hypothetical protein Harvfovirus36_1, partial	-	1	Harvfovirus sp.	Mimiviridae
TRSP27334.t1	163.555	phosphoribosyl-AMP cyclohydrolase	-	2	Parvularculaceae bacterium	Proteobacteria	TRSP20210.t1	169.451	hypothetical protein Harvfovirus36_1, partial	-	1	Harvfovirus sp.	Mimiviridae
TRSP33531.t1	163.541	hypothetical protein A2X64_00595	-	7	Ignavibacteria bacterium GWF2_33_9	FCB group	TRSP20214.t1	122.133	hypothetical protein Harvfovirus8_11	-	1	Harvfovirus sp.	Mimiviridae
TRSP26145.t1	163.085	NADH:flavin oxidoreductase/NADH oxidase family protein	-	6	Candidatus Hydrogenedentes bacterium	FCB group	TRSP20294.t1	59.2057	hypothetical protein Catovirus_1_560	-	1	Catovirus CTV1	Mimiviridae
TRSP32532.t1	160.974	DUF1028 domain-containing protein	-	12	Planctomycetes bacterium	PVC group	TRSP20346.t1	58.976	hypothetical protein Harvfovirus36_1, partial	-	1	Harvfovirus sp.	Mimiviridae
TRSP14031.t1	160.952	amidohydrolase	-	1	Algicola sp.	Proteobacteria	TRSP20360.t1	97.567	hypothetical protein Catovirus_1_561	-	1	Catovirus CTV1	Mimiviridae
TRSP31330.t1	159.519	endo alpha-1,4 polygalactosaminidase	-	5	Cellvibrionales bacterium	Proteobacteria	TRSP20364.t1	68.4093	F-box domain protein	-	5	Indivirus ILV1	Mimiviridae
TRSP22241.t1	158.859	GntP family permease	-	11	Thermosipho sp. (in: Bacteria)	unclassified bacteria	TRSP20395.t1	88.1609	F-box domain protein	-	2	Indivirus ILV1	Mimiviridae
TRSP19900.t1	154.416	hypothetical protein	-	25	Planctomycetes bacterium	PVC group	TRSP20457.t1	112.489	hypothetical protein Harvfovirus8_11	-	2	Harvfovirus sp.	Mimiviridae
TRSP7137.t1	152.949	aspartate--tRNA ligase	-	13	Bacteroidetes bacterium	FCB group	TRSP20458.t1	54.102	hypothetical protein Catovirus_1_560	-	1	Catovirus CTV1	Mimiviridae
TRSP14848.t1	151.004	fatty acid desaturase	-	0	Corallococcus exiguus	Proteobacteria	TRSP20572.t1	136.482	F-box domain protein	-	1	Marseillevirus LCMAC101	unclassified Marseilleviridae
TRSP4903.t1	150.741	nuclear transport factor 2 family protein	-	0	Maribacter sp.	FCB group	TRSP20655.t1	108.5	leucine-rich repeat protein	-	1	Pithovirus LCPAC101	Pithoviridae
TRSP24027.t1	150.218	nuclear transport factor 2 family protein	-	0	Fulvivirga sp. 29W222	FCB group	TRSP20668.t1	98.4987	hypothetical protein Hyperionvirus5_103	-	1	Hyperionvirus sp.	Mimiviridae
TRSP16674.t1	149.983	MBL fold metallo-hydrolase	-	6	Leptospiraceae bacterium	unclassified bacteria	TRSP20670.t1	93.3306	hypothetical protein	-	1	Tupanvirus soda lake	Mimiviridae
TRSP34339.t1	149.198	haloalkane dehalogenase	-	6	Desulfobacteraceae bacterium	Proteobacteria	TRSP20687.t1	78.3877	hypothetical protein Harvfovirus36_1, partial	-	1	Harvfovirus sp.	Mimiviridae
TRSP5209.t1	149.143	TIM barrel protein	-	13	Acidimicrobiia bacterium	Terrabacteria group	TRSP20690.t1	72.0592	F-box domain protein	-	2	Indivirus ILV1	Mimiviridae
TRSP30212.t1	148.921	glycoside hydrolase family 88 protein	-	9	Ignavibacteriales bacterium	FCB group	TRSP20736.t1	52.5263	F-box domain protein	-	1	Indivirus ILV1	Mimiviridae
TRSP22845.t1	148.739	molybdenum cofactor biosynthesis protein B	-	4	endosymbiont of Ridgeia piscesae	Proteobacteria	TRSP20747.t1	63.7616	hypothetical protein Harvfovirus30_3	-	1	Harvfovirus sp.	Mimiviridae
TRSP39051.t1	148.486	tRNA 2-selenouridine(34) synthase MnmH	-	5	Chlorogloeopsis fritschii	Terrabacteria group	TRSP20798.t1	232.306	hypothetical protein Harvfovirus3_55	-	1	Harvfovirus sp.	Mimiviridae
TRSP32602.t1	148.304	gamma-glutamyltransferase	-	14	Candidatus Poribacteria bacterium	Bacteria candidate phyla	TRSP20821.t1	227.114	hypothetical protein Harvfovirus3_55	-	1	Harvfovirus sp.	Mimiviridae
TRSP42536.t1	147.989	SDR family oxidoreductase	-	7	Bacteroidetes bacterium	FCB group	TRSP20935.t1	78.1526	hypothetical protein Hyperionvirus5_103	-	1	Hyperionvirus sp.	Mimiviridae
TRSP32474.t1	147.81	DUF5060 domain-containing protein	-	12	Planctomycetes bacterium	PVC group	TRSP20949.t1	58.9833	F-box domain protein	-	1	Indivirus ILV1	Mimiviridae
TRSP24757.t1	147.301	diaminopimelate epimerase	-	0	Scytonema sp. UIC 10036	Terrabacteria group	TRSP20957.t1	88.7195	hypothetical protein Hyperionvirus6_11	-	1	Hyperionvirus sp.	Mimiviridae
TRSP7208.t1	146.365	fibronectin type III domain-containing protein	-	14	Gorillibacterium timonense	Terrabacteria group	TRSP20994.t1	59.2574	F-box domain protein	-	1	Indivirus ILV1	Mimiviridae
TRSP9228.t1	143.707	glycosyltransferase family 1 protein	-	4	Alphaproteobacteria bacterium	Proteobacteria	TRSP21090.t1	107.686	hypothetical protein Harvfovirus36_1, partial	-	1	Harvfovirus sp.	Mimiviridae
TRSP30608.t1	143.399	VCBS repeat-containing protein	-	11	Acidobacteria bacterium	Acidobacteria	TRSP21169.t1	90.7248	hypothetical protein Harvfovirus8_11	-	3	Harvfovirus sp.	Mimiviridae
TRSP10066.t1	143.058	glucose 1-dehydrogenase	-	6	Nostoc sp. NIES-4103	Terrabacteria group	TRSP21204.t1	78.9465	hypothetical protein Harvfovirus20_10	-	1	Harvfovirus sp.	Mimiviridae
TRSP26050.t1	140.752	NYN domain-containing protein	-	0	Marinobacter hydrocarbonoclasticus	Proteobacteria	TRSP21296.t1	63.65	hypothetical protein Hyperionvirus5_103	-	1	Hyperionvirus sp.	Mimiviridae
TRSP18336.t1	138.817	Gfo/Idh/MocA family oxidoreductase	-	12	bacterium	unclassified bacteria	TRSP21508.t1	85.966	hypothetical protein Hyperionvirus5_103	-	1	Hyperionvirus sp.	Mimiviridae
TRSP22404.t1	138.171	oligopeptide transporter, OPT family	-	18	Acidobacteria bacterium	Acidobacteria	TRSP21631.t1	140.824	hypothetical protein Harvfovirus8_11	-	1	Harvfovirus sp.	Mimiviridae
TRSP19897.t1	138.033	hypothetical protein	-	24	Planctomycetes bacterium	PVC group	TRSP21641.t1	118.668	hypothetical protein	-	1	Tupanvirus soda lake	Mimiviridae
TRSP11174.t1	136.978	carbon-nitrogen hydrolase family protein	-	6	bacterium	unclassified bacteria	TRSP21653.t1	87.988	hypothetical protein Harvfovirus20_10	-	1	Harvfovirus sp.	Mimiviridae
TRSP19006.t1	135.293	DUF523 and DUF1722 domain-containing protein	-	9	candidate division KSB1 bacterium	Bacteria candidate phyla	TRSP21668.t1	100.288	hypothetical protein Harvfovirus36_1, partial	-	1	Harvfovirus sp.	Mimiviridae
TRSP12434.t1	135.12	hypothetical protein DME22_03595	-	29	Verrucomicrobia bacterium	PVC group	TRSP21828.t1	48.5668	hypothetical protein Catovirus_1_560	-	1	Catovirus CTV1	Mimiviridae
TRSP22074.t1	133.351	DUF5060 domain-containing protein	-	8	bacterium	unclassified bacteria	TRSP21848.t1	45.5755	hypothetical protein Hyperionvirus2_191	-	1	Hyperionvirus sp.	Mimiviridae
TRSP21999.t1	128.675	DUF5060 domain-containing protein	-	8	bacterium	unclassified bacteria	TRSP22000.t1	121.71	hypothetical protein Harvfovirus8_11	-	1	Harvfovirus sp.	Mimiviridae
TRSP9961.t1	127.982	amidase	-	5	Chloroflexi bacterium	Terrabacteria group	TRSP22148.t1	69.2668	F-box domain protein	-	1	Indivirus ILV1	Mimiviridae
TRSP44412.t1	127.778	alginate lyase	-	10	candidate division KSB1 bacterium	Bacteria candidate phyla	TRSP22180.t1	168.218	hypothetical protein Harvfovirus20_10	-	2	Harvfovirus sp.	Mimiviridae
TRSP29305.t1	124.676	YdcF family protein	-	3	Flavihumibacter solisilvae	FCB group	TRSP22193.t1	102.948	hypothetical protein Hyperionvirus5_103	-	1	Hyperionvirus sp.	Mimiviridae
TRSP41709.t1	124.4	CotH kinase family protein	-	23	bacterium	unclassified bacteria	TRSP22260.t1	80.9126	hypothetical protein	-	1	Tupanvirus soda lake	Mimiviridae
TRSP27319.t1	124.36	DUF5060 domain-containing protein	-	8	bacterium	unclassified bacteria	TRSP22479.t1	124.777	hypothetical protein Hyperionvirus5_120	-	2	Hyperionvirus sp.	Mimiviridae
TRSP12438.t1	124.3	hypothetical protein	-	23	Verrucomicrobia bacterium	PVC group	TRSP22523.t1	137.874	hypothetical protein	-	1	Tupanvirus soda lake	Mimiviridae
TRSP32737.t1	123.982	NAD(P)H-binding protein	-	0	Aquimarina mytili	FCB group	TRSP22638.t1	48.6439	F-box domain protein	-	1	Indivirus ILV1	Mimiviridae
TRSP28270.t1	123.948	DUF5060 domain-containing protein	-	8	bacterium	unclassified bacteria	TRSP22641.t1	84.633	hypothetical protein Harvfovirus20_10	-	2	Harvfovirus sp.	Mimiviridae
TRSP7616.t1	123.948	DUF5060 domain-containing protein	-	8	bacterium	unclassified bacteria	TRSP22658.t1	82.3197	F-box domain protein	-	1	Indivirus ILV1	Mimiviridae
TRSP39048.t1	123.839	carbon-nitrogen hydrolase family protein	-	7	Chloroflexi bacterium	Terrabacteria group	TRSP22703.t1	87.7819	hypothetical protein Harvfovirus8_11	-	1	Harvfovirus sp.	Mimiviridae
TRSP3666.t1	123.267	ADP-ribosylglycohydrolase family protein	-	17	Anaerolineae bacterium	Terrabacteria group	TRSP22728.t1	131.812	hypothetical protein Hyperionvirus6_11	-	1	Hyperionvirus sp.	Mimiviridae
TRSP31172.t1	123.125	heparinase	-	14	Planctomycetes bacterium	PVC group	TRSP22807.t1	50.9308	hypothetical protein Harvfovirus20_10	-	1	Harvfovirus sp.	Mimiviridae
TRSP15196.t1	121.897	hypothetical protein	-	8	Syntrophus gentianae	Proteobacteria	TRSP22815.t1	89.4573	F-box domain protein	-	1	Indivirus ILV1	Mimiviridae
TRSP13014.t1	121.477	DUF899 domain-containing protein	-	4	Corallococcus sicarius	Proteobacteria	TRSP22850.t1	202.804	hypothetical protein	-	1	Tupanvirus soda lake	Mimiviridae
TRSP7526.t1	121.339	DUF1826 domain-containing protein	-	0	Rhodobacteraceae bacterium	Proteobacteria	TRSP22859.t1	113.315	hypothetical protein Harvfovirus36_1, partial	-	1	Harvfovirus sp.	Mimiviridae
TRSP25464.t1	121	putative sulfate exporter family transporter	-	11	bacterium	unclassified bacteria	TRSP22975.t1	89.4528	hypothetical protein	-	1	Tupanvirus soda lake	Mimiviridae
TRSP29994.t1	121	putative sulfate exporter family transporter	-	11	bacterium	unclassified bacteria	TRSP22989.t1	61.6171	hypothetical protein Hyperionvirus6_11	-	2	Hyperionvirus sp.	Mimiviridae
TRSP33731.t1	121	putative sulfate exporter family transporter	-	11	bacterium	unclassified bacteria	TRSP23011.t1	130.189	hypothetical protein Harvfovirus20_10	-	1	Harvfovirus sp.	Mimiviridae
TRSP8419.t1	120.828	DUF899 domain-containing protein	-	4	Corallococcus sicarius	Proteobacteria	TRSP23014.t1	92.6978	hypothetical protein Harvfovirus3_55	-	1	Harvfovirus sp.	Mimiviridae
TRSP17857.t1	120.486	alpha-amylase	-	8	Anaerolinea sp.	Terrabacteria group	TRSP23034.t1	83.5947	hypothetical protein Harvfovirus8_11	-	1	Harvfovirus sp.	Mimiviridae
TRSP26489.t1	119.595	cyanase	-	4	Phormidium tenue FACHB-886	Terrabacteria group	TRSP23201.t1	167.78	hypothetical protein Harvfovirus20_10	-	1	Harvfovirus sp.	Mimiviridae
TRSP13933.t1	119.363	hypothetical protein	-	8	Planctomycetes bacterium	PVC group	TRSP23205.t1	106.544	hypothetical protein Hyperionvirus5_103	-	1	Hyperionvirus sp.	Mimiviridae
TRSP27695.t1	119.295	glucosamine-6-phosphate deaminase	-	14	Aquiflexum balticum DSM 16537	FCB group	TRSP23236.t1	85.0454	hypothetical protein Catovirus_1_561	-	2	Catovirus CTV1	Mimiviridae
TRSP30107.t1	118.972	hypothetical protein	-	17	Ardenticatenales bacterium	Terrabacteria group	TRSP23249.t1	61.1577	F-box domain protein	-	3	Indivirus ILV1	Mimiviridae
TRSP44482.t1	117.686	TIGR04283 family arsenosugar biosynthesis glycosyltransferase	-	17	Geitlerinema sp. PCC 7105	Terrabacteria group	TRSP23332.t1	67.7025	leucine-rich repeat protein	-	3	Pithovirus LCPAC101	Pithoviridae
TRSP17163.t1	116.016	mutarotase	-	0	Winogradskyella forsetii	FCB group	TRSP23338.t1	59.5183	hypothetical protein Hyperionvirus2_165	-	1	Hyperionvirus sp.	Mimiviridae
TRSP20642.t1	115.932	hypothetical protein	-	20	Polyangiaceae bacterium	Proteobacteria	TRSP23342.t1	100.005	hypothetical protein Harvfovirus8_11	-	1	Harvfovirus sp.	Mimiviridae
TRSP11016.t1	115.872	SGNH/GDSL hydrolase family protein	-	7	Chloroflexi bacterium	Terrabacteria group	TRSP23391.t1	140.091	hypothetical protein Harvfovirus20_10	-	2	Harvfovirus sp.	Mimiviridae
TRSP20408.t1	115.568	nuclear transport factor 2 family protein	-	1	Emticicia sp. CRIBPO	FCB group	TRSP23707.t1	172.093	hypothetical protein Harvfovirus20_10	-	1	Harvfovirus sp.	Mimiviridae
TRSP31614.t1	115.294	TMEM43 family protein	-	8	Gammaproteobacteria bacterium	Proteobacteria	TRSP23890.t1	142.05	hypothetical protein	-	1	Tupanvirus soda lake	Mimiviridae
TRSP36757.t1	115.242	hypothetical protein	-	5	Methylomarinum vadi	Proteobacteria	TRSP2406.t1	117.14	hypothetical protein	-	1	Tupanvirus soda lake	Mimiviridae
TRSP26407.t1	114.867	MULTISPECIES: NAD(P)-dependent oxidoreductase	-	7	unclassified Acidisoma	Proteobacteria	TRSP2407.t1	145.616	hypothetical protein Harvfovirus8_11	-	1	Harvfovirus sp.	Mimiviridae
TRSP20693.t1	113.619	glycoside hydrolase family 2	-	5	Phycisphaerales bacterium	PVC group	TRSP24120.t1	109.363	hypothetical protein	-	1	Tupanvirus soda lake	Mimiviridae
TRSP3657.t1	112.841	hypothetical protein	-	17	Ardenticatenales bacterium	Terrabacteria group	TRSP24165.t1	104.283	hypothetical protein Hyperionvirus5_103	-	1	Hyperionvirus sp.	Mimiviridae
TRSP10782.t1	112.704	hypothetical protein	-	15	Chlorobi bacterium	FCB group	TRSP24423.t1	88.2385	F-box domain protein	-	1	Indivirus ILV1	Mimiviridae
TRSP20155.t1	112.623	galactose-1-phosphate uridylyltransferase	-	5	Candidatus Cloacimonetes bacterium	FCB group	TRSP24427.t1	182.046	hypothetical protein Harvfovirus3_55	-	1	Harvfovirus sp.	Mimiviridae
TRSP43416.t1	112.537	galactose-1-phosphate uridylyltransferase	-	5	Planktothricoides sp. FACHB-1261	Terrabacteria group	TRSP24442.t1	201.317	hypothetical protein Harvfovirus20_10	-	3	Harvfovirus sp.	Mimiviridae
TRSP29410.t1	112.49	hypothetical protein	-	8	Acidobacteriia bacterium	Acidobacteria	TRSP24512.t1	55.5761	hypothetical protein Harvfovirus8_11	-	2	Harvfovirus sp.	Mimiviridae
TRSP14388.t1	112.446	hypothetical protein	-	2	Deltaproteobacteria bacterium	Proteobacteria	TRSP24517.t1	84.8403	hypothetical protein Catovirus_1_546	-	2	Catovirus CTV1	Mimiviridae
TRSP20636.t1	112.164	hypothetical protein	-	18	Polyangiaceae bacterium	Proteobacteria	TRSP24527.t1	146.347	hypothetical protein Harvfovirus8_11	-	1	Harvfovirus sp.	Mimiviridae
TRSP26188.t1	111.728	hypothetical protein C4541_00145	-	6	Candidatus Aureabacteria bacterium SURF_26	PVC group	TRSP24538.t1	92.298	hypothetical protein Hyperionvirus5_103	-	1	Hyperionvirus sp.	Mimiviridae
TRSP1016.t1	111.625	enoyl-CoA hydratase/isomerase family protein	-	9	Desulfomonile tiedjei	Proteobacteria	TRSP24544.t1	144.197	hypothetical protein Hyperionvirus5_120	-	2	Hyperionvirus sp.	Mimiviridae
TRSP23982.t1	111.6	phosphoribosyltransferase	-	5	Spirochaetales bacterium	unclassified bacteria	TRSP24577.t1	143.42	hypothetical protein Harvfovirus20_10	-	2	Harvfovirus sp.	Mimiviridae
TRSP1910.t1	111.139	glycoside hydrolase family 3 C-terminal domain-containing protein	-	31	Arcticibacter tournemirensis	FCB group	TRSP24686.t1	125.559	hypothetical protein Harvfovirus20_10	-	1	Harvfovirus sp.	Mimiviridae
TRSP22095.t1	110.485	L-fucose mutarotase	-	4	Clostridium grantii DSM 8605	Terrabacteria group	TRSP24743.t1	83.6531	hypothetical protein Hyperionvirus6_11	-	1	Hyperionvirus sp.	Mimiviridae
TRSP22066.t1	108.484	aminodeoxychorismate synthase component I	-	24	Dendronalium phyllosphericum CENA369	Terrabacteria group	TRSP24784.t1	87.9629	uncharacterized protein LCDPAC01_02410	-	3	Pithovirus LCDPAC01	Pithoviridae
TRSP22995.t1	106.853	FAD-binding oxidoreductase	-	6	Geminicoccus roseus	Proteobacteria	TRSP24804.t1	86.2212	hypothetical protein Harvfovirus20_10	-	2	Harvfovirus sp.	Mimiviridae
TRSP28448.t1	105.975	prenyltransferase	-	8	Chloroflexi bacterium HGW-Chloroflexi-2	Terrabacteria group	TRSP24865.t1	62.8199	F-box domain protein	-	2	Indivirus ILV1	Mimiviridae
TRSP38998.t1	105.735	erythritol/L-threitol dehydrogenase	-	10	Chloroflexi bacterium	Terrabacteria group	TRSP24909.t1	55.4342	hypothetical protein Harvfovirus8_11	-	1	Harvfovirus sp.	Mimiviridae
TRSP11363.t1	104.417	50S ribosomal protein L2	-	8	Sulfurihydrogenibium sp.	unclassified bacteria	TRSP25116.t1	47.4434	hypothetical protein Hyperionvirus2_165	-	1	Hyperionvirus sp.	Mimiviridae
TRSP15777.t1	104.106	hypothetical protein B6I28_00120	-	8	Fusobacteriia bacterium 4572_132	unclassified bacteria	TRSP25271.t1	167.757	hypothetical protein Harvfovirus20_10	-	1	Harvfovirus sp.	Mimiviridae
TRSP16651.t1	103.821	Zinc-type alcohol dehydrogenase-like protein	-	0	Olavius algarvensis associated proteobacterium Delta 3	Proteobacteria	TRSP25632.t1	79.2981	F-box domain protein	-	1	Indivirus ILV1	Mimiviridae
TRSP7410.t1	103.369	ricin-type beta-trefoil lectin domain protein	-	2	Aquimarina agarilytica	FCB group	TRSP25635.t1	122.68	hypothetical protein Harvfovirus8_11	-	1	Harvfovirus sp.	Mimiviridae
TRSP13289.t1	102.566	DUF2237 domain-containing protein	-	2	Microcoleus sp. IPPAS B-353	Terrabacteria group	TRSP25746.t1	94.5894	F-box domain protein	-	1	Marseillevirus LCMAC101	unclassified Marseilleviridae
TRSP14291.t1	102.26	DUF302 domain-containing protein	-	7	Rubricoccus marinus	FCB group	TRSP25853.t1	98.8552	hypothetical protein Harvfovirus8_11	-	1	Harvfovirus sp.	Mimiviridae
TRSP26990.t1	101.898	hypothetical protein	-	6	Deltaproteobacteria bacterium	Proteobacteria	TRSP25860.t1	92.5864	hypothetical protein Harvfovirus8_11	-	1	Harvfovirus sp.	Mimiviridae
TRSP9779.t1	101.456	metal-dependent phosphohydrolase	-	10	Jacksonvillea sp. ISTCYN1	Terrabacteria group	TRSP25955.t1	97.5715	hypothetical protein Harvfovirus8_11	-	1	Harvfovirus sp.	Mimiviridae
TRSP13340.t1	101.417	hypothetical protein	-	11	Anaerolineaceae bacterium	Terrabacteria group	TRSP2597.t1	60.8795	leucine-rich repeat protein	-	3	Pithovirus LCPAC101	Pithoviridae
TRSP19856.t1	101.314	ParB N-terminal domain-containing protein	-	16	Selenomonadaceae bacterium	Terrabacteria group	TRSP25972.t1	142.992	hypothetical protein Harvfovirus20_10	-	1	Harvfovirus sp.	Mimiviridae
TRSP9934.t1	101.047	6-phosphogluconolactonase	-	7	Acidobacteria bacterium	Acidobacteria	TRSP26110.t1	124.687	hypothetical protein Hyperionvirus5_120	-	13	Hyperionvirus sp.	Mimiviridae
TRSP5256.t1	100.93	lactonase family protein	-	6	Chloroflexi bacterium	Terrabacteria group	TRSP26262.t1	55.8233	hypothetical protein Harvfovirus36_1, partial	-	7	Harvfovirus sp.	Mimiviridae
TRSP40646.t1	100.277	hypothetical protein BSZ36_02190	-	7	Rubricoccus marinus	FCB group	TRSP26398.t1	86.5341	hypothetical protein Harvfovirus8_11	-	10	Harvfovirus sp.	Mimiviridae
TRSP12293.t1	99.7978	AAA family ATPase	-	13	Actinomadura bangladeshensis	Terrabacteria group	TRSP26465.t1	217.807	hypothetical protein Harvfovirus3_55	-	1	Harvfovirus sp.	Mimiviridae
TRSP7938.t1	98.6747	Por secretion system C-terminal sorting domain-containing protein	-	21	Capsulimonas corticalis	Terrabacteria group	TRSP26476.t1	95.6759	hypothetical protein Harvfovirus8_11	-	1	Harvfovirus sp.	Mimiviridae
TRSP42032.t1	98.0949	L-rhamnose mutarotase	-	1	Planctomycetes bacterium	PVC group	TRSP26741.t1	149.122	hypothetical protein	-	2	Tupanvirus soda lake	Mimiviridae
TRSP17156.t1	97.9674	ribonuclease HI	-	0	Desulfobacteraceae bacterium Eth-SRB2	Proteobacteria	TRSP26792.t1	56.8265	F-box domain protein	-	1	Indivirus ILV1	Mimiviridae
TRSP13447.t1	97.711	isopenicillin N synthase family oxygenase	-	9	Acidobacteria bacterium	Acidobacteria	TRSP26866.t1	115.025	hypothetical protein Harvfovirus36_1, partial	-	1	Harvfovirus sp.	Mimiviridae
TRSP25944.t1	95.5874	amidohydrolase family protein	-	11	Cyanobacteria bacterium FACHB-471	Terrabacteria group	TRSP26893.t1	51.9554	F-box domain protein	-	3	Indivirus ILV1	Mimiviridae
TRSP44391.t1	95.4009	low-specificity L-threonine aldolase	-	12	Caldilineae bacterium	Terrabacteria group	TRSP27012.t1	203.539	hypothetical protein Harvfovirus3_55	-	1	Harvfovirus sp.	Mimiviridae
TRSP16741.t1	95.3039	peptidyl-prolyl cis-trans isomerase	-	6	Planctomycetes bacterium	PVC group	TRSP27114.t1	98.9115	hypothetical protein Harvfovirus8_11	-	1	Harvfovirus sp.	Mimiviridae
TRSP42468.t1	95.0078	alkane 1-monooxygenase	-	10	Leptospira venezuelensis	unclassified bacteria	TRSP27187.t1	57.8577	hypothetical protein Harvfovirus30_3	-	2	Harvfovirus sp.	Mimiviridae
TRSP6080.t1	94.7159	hypothetical protein	-	16	Ardenticatenales bacterium	Terrabacteria group	TRSP27318.t1	89.4237	hypothetical protein Hyperionvirus5_103	-	1	Hyperionvirus sp.	Mimiviridae
TRSP16847.t1	94.0286	cupin domain-containing protein	-	23	Sulfitobacter sp. JL08	Proteobacteria	TRSP27365.t1	130.512	hypothetical protein Hyperionvirus5_120	-	2	Hyperionvirus sp.	Mimiviridae
TRSP35440.t1	93.2483	choline dehydrogenase	-	16	Fischerella sp.	Terrabacteria group	TRSP27387.t1	61.4194	hypothetical protein	-	2	Tupanvirus soda lake	Mimiviridae
TRSP9745.t1	92.7478	ADP-ribosylglycohydrolase family protein	-	6	Tengunoibacter tsumagoiensis	Terrabacteria group	TRSP27403.t1	76.9242	leucine-rich repeat protein	-	3	Pithovirus LCPAC101	Pithoviridae
TRSP23868.t1	92.6754	LacI family transcriptional regulator	-	21	Chloroflexi bacterium	Terrabacteria group	TRSP27430.t1	172.068	hypothetical protein Harvfovirus3_55	-	2	Harvfovirus sp.	Mimiviridae
TRSP21713.t1	92.0546	hypothetical protein	-	13	Deltaproteobacteria bacterium	Proteobacteria	TRSP27555.t1	68.6674	hypothetical protein Harvfovirus8_11	-	1	Harvfovirus sp.	Mimiviridae
TRSP41895.t1	91.947	LacI family transcriptional regulator	-	19	Chloroflexi bacterium	Terrabacteria group	TRSP27726.t1	110.644	hypothetical protein Harvfovirus20_10	-	1	Harvfovirus sp.	Mimiviridae
TRSP18389.t1	91.8964	DUF302 domain-containing protein	-	5	Rubricoccus marinus	FCB group	TRSP27822.t1	86.3415	hypothetical protein Harvfovirus8_11	-	1	Harvfovirus sp.	Mimiviridae
TRSP40075.t1	91.5669	phytanoyl-CoA dioxygenase family protein	-	2	Leptospiraceae bacterium	unclassified bacteria	TRSP27901.t1	107.802	hypothetical protein Harvfovirus36_1, partial	-	1	Harvfovirus sp.	Mimiviridae
TRSP23576.t1	91.1479	hypothetical protein	-	7	Paenibacillus paeoniae	Terrabacteria group	TRSP27915.t1	123.293	hypothetical protein Harvfovirus8_11	-	1	Harvfovirus sp.	Mimiviridae
TRSP14033.t1	90.3865	acyl-CoA thioester hydrolase	-	6	Solirubrobacter pauli	Terrabacteria group	TRSP27916.t1	84.1197	hypothetical protein Harvfovirus8_11	-	1	Harvfovirus sp.	Mimiviridae
TRSP22405.t1	90.2723	fatty acid desaturase	-	7	Nostoc sp. NIES-4103	Terrabacteria group	TRSP28059.t1	136.41	hypothetical protein Harvfovirus36_1, partial	-	2	Harvfovirus sp.	Mimiviridae
TRSP8055.t1	90.2711	isoprenylcysteine carboxylmethyltransferase family protein	-	0	Saprospiraceae bacterium	FCB group	TRSP28148.t1	106.007	hypothetical protein Harvfovirus8_11	-	1	Harvfovirus sp.	Mimiviridae
TRSP18723.t1	90.1779	glycoside hydrolase family 13 protein	-	10	Phycisphaerae bacterium	PVC group	TRSP28299.t1	140.091	hypothetical protein Harvfovirus20_10	-	2	Harvfovirus sp.	Mimiviridae
TRSP28862.t1	90.1252	SMI1/KNR4 family protein	-	0	Paenibacillus glycinis	Terrabacteria group	TRSP28314.t1	80.9375	hypothetical protein	-	1	Tupanvirus soda lake	Mimiviridae
TRSP16458.t1	89.8574	MaoC family dehydratase N-terminal domain-containing protein	-	8	Polynucleobacter asymbioticus	Proteobacteria	TRSP28502.t1	116.041	hypothetical protein Hyperionvirus6_11	-	1	Hyperionvirus sp.	Mimiviridae
TRSP10605.t1	89.1216	S9 family peptidase	-	18	Calditrichaeota bacterium	unclassified bacteria	TRSP28508.t1	68.8206	hypothetical protein Harvfovirus30_3	-	1	Harvfovirus sp.	Mimiviridae
TRSP19940.t1	89.1216	S9 family peptidase	-	18	Calditrichaeota bacterium	unclassified bacteria	TRSP2860.t1	103.708	hypothetical protein Hyperionvirus5_103	-	1	Hyperionvirus sp.	Mimiviridae
TRSP16889.t1	89.0589	hypothetical protein	-	8	Scytonema sp. UIC 10036	Terrabacteria group	TRSP28610.t1	84.0839	hypothetical protein Harvfovirus36_1, partial	-	2	Harvfovirus sp.	Mimiviridae
TRSP17273.t1	88.9763	agmatinase	-	5	Saprospiraceae bacterium	FCB group	TRSP28621.t1	100.94	hypothetical protein Harvfovirus8_11	-	2	Harvfovirus sp.	Mimiviridae
TRSP28872.t1	88.8805	SMI1/KNR4 family protein	-	0	Paenibacillus glycinis	Terrabacteria group	TRSP28682.t1	88.4285	F-box domain protein	-	1	Indivirus ILV1	Mimiviridae
TRSP13461.t1	88.2661	hypothetical protein	-	4	Methylomarinum vadi	Proteobacteria	TRSP28710.t1	54.6415	hypothetical protein Harvfovirus5_25	-	1	Harvfovirus sp.	Mimiviridae
TRSP44035.t1	88.0208	Fibronectin type III domain protein	-	7	Phycisphaerae bacterium RAS2	PVC group	TRSP28731.t1	130.973	hypothetical protein Harvfovirus36_1, partial	-	2	Harvfovirus sp.	Mimiviridae
TRSP27823.t1	87.3412	hypothetical protein	-	3	Deltaproteobacteria bacterium	Proteobacteria	TRSP28832.t1	156.359	hypothetical protein	-	2	Tupanvirus soda lake	Mimiviridae
TRSP36785.t1	87.1267	cadherin-like domain-containing protein	-	11	Synechococcus sp. PCC 7336	Terrabacteria group	TRSP28908.t1	106.571	hypothetical protein	-	1	Tupanvirus soda lake	Mimiviridae
TRSP17231.t1	87.0158	class I SAM-dependent methyltransferase	-	5	Desertifilum sp. IPPAS B-1220	Terrabacteria group	TRSP29101.t1	88.073	hypothetical protein Harvfovirus36_1, partial	-	1	Harvfovirus sp.	Mimiviridae
TRSP25602.t1	86.8304	ricin-type beta-trefoil lectin domain protein	-	3	Aquimarina agarilytica	FCB group	TRSP29150.t1	107.812	hypothetical protein Harvfovirus8_11	-	3	Harvfovirus sp.	Mimiviridae
TRSP32841.t1	86.7533	choline dehydrogenase	-	14	Fischerella sp.	Terrabacteria group	TRSP29234.t1	101.823	hypothetical protein Harvfovirus3_55	-	1	Harvfovirus sp.	Mimiviridae
TRSP20730.t1	86.6103	class I SAM-dependent methyltransferase	-	8	Candidatus Poribacteria bacterium	Bacteria candidate phyla	TRSP29237.t1	125.545	hypothetical protein Harvfovirus8_11	-	3	Harvfovirus sp.	Mimiviridae
TRSP32721.t1	86.4474	hypothetical protein	-	19	Planctomycetes bacterium	PVC group	TRSP29281.t1	68.2202	hypothetical protein Harvfovirus8_11	-	1	Harvfovirus sp.	Mimiviridae
TRSP924.t1	86.0979	alpha-amylase	-	4	Blastocatellia bacterium	Acidobacteria	TRSP29288.t1	66.7532	DEAD/SNF2-like helicase	-	26	Harvfovirus sp.	Mimiviridae
TRSP26356.t1	86.074	alpha-amylase	-	4	Blastocatellia bacterium	Acidobacteria	TRSP29501.t1	130.311	hypothetical protein Harvfovirus36_1, partial	-	2	Harvfovirus sp.	Mimiviridae
TRSP28174.t1	85.9986	alkylhydroperoxidase	-	7	bacterium	unclassified bacteria	TRSP29533.t1	180.594	hypothetical protein	-	1	Tupanvirus soda lake	Mimiviridae
TRSP10561.t1	85.7015	DUF302 domain-containing protein	-	5	Gillisia hiemivivida	FCB group	TRSP29650.t1	116.444	hypothetical protein Harvfovirus8_11	-	1	Harvfovirus sp.	Mimiviridae
TRSP36719.t1	85.3008	methyltransferase domain-containing protein	-	7	Candidatus Rokubacteria bacterium	Bacteria candidate phyla	TRSP29725.t1	93.0332	hypothetical protein Hyperionvirus5_103	-	1	Hyperionvirus sp.	Mimiviridae
TRSP26212.t1	85.2639	class I SAM-dependent methyltransferase	-	7	Candidatus Poribacteria bacterium	Bacteria candidate phyla	TRSP29759.t1	147.752	hypothetical protein Harvfovirus20_10	-	3	Harvfovirus sp.	Mimiviridae
TRSP2577.t1	85.2313	beta-galactosidase	-	17	Sedimentisphaera cyanobacteriorum	PVC group	TRSP29763.t1	204.918	hypothetical protein Harvfovirus3_55	-	2	Harvfovirus sp.	Mimiviridae
TRSP43972.t1	85.1579	right-handed parallel beta-helix repeat-containing protein	-	11	candidate division KSB1 bacterium	Bacteria candidate phyla	TRSP29772.t1	204.536	hypothetical protein Harvfovirus3_55	-	2	Harvfovirus sp.	Mimiviridae
TRSP41449.t1	84.8104	cadherin-like domain-containing protein	-	21	Synechococcus sp. PCC 7336	Terrabacteria group	TRSP29814.t1	51.2529	hypothetical protein Hyperionvirus6_87	-	2	Hyperionvirus sp.	Mimiviridae
TRSP11168.t1	84.5871	NAD(P)-dependent alcohol dehydrogenase	-	0	Chloroflexi bacterium	Terrabacteria group	TRSP29826.t1	80.1129	hypothetical protein Hyperionvirus5_120	-	2	Hyperionvirus sp.	Mimiviridae
TRSP40332.t1	84.2556	hypothetical protein	-	11	Leptolyngbya sp. SIO1E4	Terrabacteria group	TRSP29862.t1	78.9077	F-box domain protein	-	1	Indivirus ILV1	Mimiviridae
TRSP17272.t1	84.1138	class I SAM-dependent methyltransferase	-	7	Desertifilum sp. IPPAS B-1220	Terrabacteria group	TRSP29984.t1	57.6157	F-box domain protein	-	2	Indivirus ILV1	Mimiviridae
TRSP18143.t1	83.9332	AAA family ATPase	-	14	Mesobacillus persicus	Terrabacteria group	TRSP30043.t1	178.8	hypothetical protein Harvfovirus20_10	-	1	Harvfovirus sp.	Mimiviridae
TRSP13822.t1	83.6644	chromosome partitioning protein ParA	-	9	Pseudohongiella sp.	Proteobacteria	TRSP30311.t1	95.0183	TerD domain-containing protein	-	13	Fadolivirus 1	unclassified viruses
TRSP17315.t1	83.6644	chromosome partitioning protein ParA	-	9	Pseudohongiella sp.	Proteobacteria	TRSP30317.t1	94.5379	hypothetical protein Harvfovirus8_11	-	1	Harvfovirus sp.	Mimiviridae
TRSP14275.t1	83.5644	ricin-type beta-trefoil lectin domain protein	-	1	Aquimarina agarilytica	FCB group	TRSP30327.t1	59.6596	hypothetical protein	-	2	Tupanvirus soda lake	Mimiviridae
TRSP25545.t1	83.5032	amidase	-	14	Anaerolineales bacterium	Terrabacteria group	TRSP30483.t1	57.7812	F-box domain protein	-	3	Indivirus ILV1	Mimiviridae
TRSP3880.t1	83.3952	NAD(P)/FAD-dependent oxidoreductase	-	7	Enhygromyxa salina	Proteobacteria	TRSP30531.t1	114.752	hypothetical protein Harvfovirus20_10	-	1	Harvfovirus sp.	Mimiviridae
TRSP32583.t1	83.0595	penicillin acylase family protein	-	23	Marinithermus hydrothermalis DSM 14884	Terrabacteria group	TRSP31088.t1	111.865	hypothetical protein Harvfovirus20_10	-	1	Harvfovirus sp.	Mimiviridae
TRSP16662.t1	83.0411	hypothetical protein	-	7	Candidatus Kapabacteria bacterium	FCB group	TRSP31132.t1	100.124	hypothetical protein Harvfovirus8_11	-	1	Harvfovirus sp.	Mimiviridae
TRSP18039.t1	82.9841	T9SS type A sorting domain-containing protein	-	1	Aquimarina agarivorans	FCB group	TRSP31133.t1	81.0614	hypothetical protein Harvfovirus30_3	-	1	Harvfovirus sp.	Mimiviridae
TRSP14970.t1	82.5411	penicillin amidase	-	21	Thermoflexales bacterium	Terrabacteria group	TRSP31149.t1	105.791	hypothetical protein	-	1	Tupanvirus soda lake	Mimiviridae
TRSP27036.t1	82.344	isocitrate/isopropylmalate dehydrogenase family protein	-	27	candidate division NC10 bacterium	Bacteria candidate phyla	TRSP31291.t1	96.8385	hypothetical protein Harvfovirus8_11	-	1	Harvfovirus sp.	Mimiviridae
TRSP27694.t1	82.2812	PQQ-dependent sugar dehydrogenase	-	10	Robiginitalea biformata HTCC2501	FCB group	TRSP31309.t1	56.065	hypothetical protein Harvfovirus36_1, partial	-	1	Harvfovirus sp.	Mimiviridae
TRSP16386.t1	82.246	ABC transporter substrate-binding protein	-	2	Candidatus Cyclonatronum proteinivorum	FCB group	TRSP31395.t1	86.7383	F-box domain protein	-	5	Indivirus ILV1	Mimiviridae
TRSP1401.t1	82.203	DUF1295 domain-containing protein	-	0	Flavobacteriales bacterium	FCB group	TRSP31492.t1	56.1997	F-box domain protein	-	1	Indivirus ILV1	Mimiviridae
TRSP29706.t1	82.1092	T9SS type A sorting domain-containing protein	-	1	Aquimarina agarivorans	FCB group	TRSP31493.t1	77.286	hypothetical protein Harvfovirus36_1, partial	-	1	Harvfovirus sp.	Mimiviridae
TRSP34370.t1	82.1092	T9SS type A sorting domain-containing protein	-	1	Aquimarina agarivorans	FCB group	TRSP31698.t1	127.467	hypothetical protein Harvfovirus8_11	-	1	Harvfovirus sp.	Mimiviridae
TRSP36801.t1	82.0093	cadherin-like domain-containing protein	-	11	Synechococcus sp. PCC 7336	Terrabacteria group	TRSP31739.t1	71.5708	hypothetical protein Catovirus_1_560	-	3	Catovirus CTV1	Mimiviridae
TRSP17974.t1	81.9564	DUF1295 domain-containing protein	-	0	Flavobacteriales bacterium	FCB group	TRSP32270.t1	132.865	hypothetical protein Harvfovirus8_11	-	1	Harvfovirus sp.	Mimiviridae
TRSP34342.t1	81.7095	DNA-3-methyladenine glycosylase I	-	6	Flavobacteriales bacterium	FCB group	TRSP32544.t1	79.0805	hypothetical protein	-	2	Tupanvirus soda lake	Mimiviridae
TRSP3878.t1	81.3292	NAD(P)/FAD-dependent oxidoreductase	-	7	Nostoc sp. C052	Terrabacteria group	TRSP32571.t1	219.396	hypothetical protein Harvfovirus3_55	-	2	Harvfovirus sp.	Mimiviridae
TRSP13711.t1	81.1456	VOC family protein	-	1	Flavobacteriales bacterium	FCB group	TRSP32703.t1	49.479	hypothetical protein Hyperionvirus5_120	-	14	Hyperionvirus sp.	Mimiviridae
TRSP38197.t1	81.029	RICIN domain-containing protein	-	13	Fulvivirga sp. M361	FCB group	TRSP32752.t1	105.843	hypothetical protein Hyperionvirus5_103	-	2	Hyperionvirus sp.	Mimiviridae
TRSP21224.t1	80.9854	glutathione S-transferase	-	4	Rubrobacter taiwanensis	Terrabacteria group	TRSP32864.t1	121.848	hypothetical protein Harvfovirus8_11	-	1	Harvfovirus sp.	Mimiviridae
TRSP32751.t1	80.8441	RICIN domain-containing protein	-	13	Fulvivirga sp. M361	FCB group	TRSP32870.t1	133.612	hypothetical protein Harvfovirus36_1, partial	-	1	Harvfovirus sp.	Mimiviridae
TRSP36787.t1	80.4771	cadherin-like domain-containing protein	-	11	Synechococcus sp. PCC 7336	Terrabacteria group	TRSP32892.t1	63.5338	hypothetical protein Harvfovirus3_55	-	2	Harvfovirus sp.	Mimiviridae
TRSP25914.t1	79.9124	RICIN domain-containing protein	-	3	Fulvivirga sp. M361	FCB group	TRSP32905.t1	137.855	hypothetical protein Harvfovirus20_10	-	1	Harvfovirus sp.	Mimiviridae
TRSP19466.t1	79.4674	isoprenylcysteine carboxylmethyltransferase family protein	-	0	Saprospiraceae bacterium	FCB group	TRSP32999.t1	90.2043	hypothetical protein Harvfovirus8_11	-	1	Harvfovirus sp.	Mimiviridae
TRSP42540.t1	79.3385	fatty acid desaturase	-	9	Hymenobacter gummosus	FCB group	TRSP33001.t1	86.0345	hypothetical protein Harvfovirus8_11	-	3	Harvfovirus sp.	Mimiviridae
TRSP30128.t1	79.2768	hypothetical protein	-	13	bacterium	unclassified bacteria	TRSP33008.t1	103.472	hypothetical protein Harvfovirus8_11	-	1	Harvfovirus sp.	Mimiviridae
TRSP27759.t1	79.007	RtcB family protein	-	9	Acanthopleuribacteraceae bacterium M133	Acidobacteria	TRSP3312.t1	62.56	hypothetical protein Harvfovirus20_10	-	3	Harvfovirus sp.	Mimiviridae
TRSP24540.t1	78.9134	hypothetical protein AMJ84_09630, partial	-	8	Acidithiobacillales bacterium SM23_46	Proteobacteria	TRSP33259.t1	85.9628	hypothetical protein Harvfovirus30_3	-	1	Harvfovirus sp.	Mimiviridae
TRSP22181.t1	78.6736	heparinase II/III family protein	-	19	Verrucomicrobia bacterium	PVC group	TRSP3351.t1	117.026	hypothetical protein Harvfovirus8_11	-	2	Harvfovirus sp.	Mimiviridae
TRSP7892.t1	78.4767	methyltransferase domain-containing protein	-	7	Candidatus Rokubacteria bacterium	Bacteria candidate phyla	TRSP33913.t1	79.1727	hypothetical protein Catovirus_1_560	-	4	Catovirus CTV1	Mimiviridae
TRSP41942.t1	77.8916	NRDE family protein	-	5	Desulfobacteraceae bacterium	Proteobacteria	TRSP34180.t1	60.6789	hypothetical protein Hyperionvirus2_165	-	1	Hyperionvirus sp.	Mimiviridae
TRSP39279.t1	77.7771	DUF1295 domain-containing protein	-	0	Flavobacteriales bacterium	FCB group	TRSP34283.t1	71.8496	hypothetical protein Catovirus_1_560	-	1	Catovirus CTV1	Mimiviridae
TRSP13770.t1	77.2571	cadherin-like domain-containing protein	-	11	Synechococcus sp. PCC 7336	Terrabacteria group	TRSP34299.t1	98.0193	hypothetical protein Harvfovirus30_3	-	1	Harvfovirus sp.	Mimiviridae
TRSP19290.t1	77.1958	PhzF family phenazine biosynthesis protein	-	11	Hassallia byssoidea VB512170	Terrabacteria group	TRSP34325.t1	133.233	hypothetical protein Harvfovirus20_10	-	1	Harvfovirus sp.	Mimiviridae
TRSP17224.t1	77.0266	class I SAM-dependent methyltransferase	-	6	Desertifilum sp. IPPAS B-1220	Terrabacteria group	TRSP34356.t1	148.892	hypothetical protein Harvfovirus20_10	-	1	Harvfovirus sp.	Mimiviridae
TRSP6933.t1	77.0206	glycoside hydrolase	-	10	Paenibacillus lentus	Terrabacteria group	TRSP3450.t1	177.841	hypothetical protein Harvfovirus20_10	-	1	Harvfovirus sp.	Mimiviridae
TRSP23764.t1	76.0974	lactoylglutathione lyase	-	0	Cyanobacteria bacterium UBA11368	Terrabacteria group	TRSP34615.t1	55.1667	F-box domain protein	-	2	Indivirus ILV1	Mimiviridae
TRSP18654.t1	76.0536	cadherin-like domain-containing protein	-	10	Synechococcus sp. PCC 7336	Terrabacteria group	TRSP35089.t1	138.037	hypothetical protein Harvfovirus20_10	-	1	Harvfovirus sp.	Mimiviridae
TRSP4165.t1	75.8387	RNA-binding transcriptional accessory protein	-	17	Calditrichaeota bacterium	unclassified bacteria	TRSP35090.t1	85.5108	hypothetical protein Hyperionvirus2_165	-	1	Hyperionvirus sp.	Mimiviridae
TRSP23588.t1	75.8035	cellulase family glycosylhydrolase	-	10	Stigonema ocellatum SAG 48.90 = DSM 106950	Terrabacteria group	TRSP35167.t1	96.1349	hypothetical protein Harvfovirus8_11	-	2	Harvfovirus sp.	Mimiviridae
TRSP36691.t1	75.6276	cadherin-like domain-containing protein	-	10	Synechococcus sp. PCC 7336	Terrabacteria group	TRSP3555.t1	99.0331	hypothetical protein	-	1	Tupanvirus soda lake	Mimiviridae
TRSP25114.t1	75.4977	glutamine cyclotransferase	-	7	Anaerolineaceae bacterium	Terrabacteria group	TRSP35759.t1	77.8466	hypothetical protein	-	4	Tupanvirus soda lake	Mimiviridae
TRSP30325.t1	75.4472	glutathione S-transferase	-	4	Yersinia bercovieri	Proteobacteria	TRSP3576.t1	98.7607	hypothetical protein	-	1	Tupanvirus soda lake	Mimiviridae
TRSP3974.t1	75.3377	AMP-binding protein	-	12	Nostoc sp. FACHB-973	Terrabacteria group	TRSP3577.t1	85.3462	hypothetical protein Harvfovirus30_3	-	1	Harvfovirus sp.	Mimiviridae
TRSP27930.t1	75.1002	cadherin-like domain-containing protein	-	11	Synechococcus sp. PCC 7336	Terrabacteria group	TRSP35928.t1	67.2178	hypothetical protein Hyperionvirus1_126	-	2	Hyperionvirus sp.	Mimiviridae
TRSP18381.t1	74.9334	glycoside hydrolase	-	10	Paenibacillus lentus	Terrabacteria group	TRSP3614.t1	77.3087	hypothetical protein Harvfovirus8_11	-	11	Harvfovirus sp.	Mimiviridae
TRSP42703.t1	74.8604	AGE family epimerase/isomerase	-	8	Bacteroidales bacterium	FCB group	TRSP36384.t1	97.957	hypothetical protein Harvfovirus8_11	-	2	Harvfovirus sp.	Mimiviridae
TRSP23215.t1	74.8379	glycoside hydrolase family protein	-	6	Pseudarcicella hirudinis	FCB group	TRSP36392.t1	64.7468	F-box domain protein	-	2	Indivirus ILV1	Mimiviridae
TRSP6738.t1	74.3195	hypothetical protein	-	14	Deltaproteobacteria bacterium	Proteobacteria	TRSP3664.t1	88.9445	hypothetical protein Harvfovirus3_55	-	1	Harvfovirus sp.	Mimiviridae
TRSP35081.t1	74.0685	hypothetical protein	-	7	Microcoleaceae bacterium UBA9251	Terrabacteria group	TRSP36642.t1	151.469	hypothetical protein Harvfovirus20_10	-	1	Harvfovirus sp.	Mimiviridae
TRSP8163.t1	73.9731	hypothetical protein AMJ92_04220	-	17	candidate division Zixibacteria bacterium SM23_81	FCB group	TRSP3671.t1	94.8448	hypothetical protein Harvfovirus8_11	-	1	Harvfovirus sp.	Mimiviridae
TRSP16418.t1	73.7542	alpha/beta hydrolase	-	7	Hyphomonas sp.	Proteobacteria	TRSP36734.t1	104.26	hypothetical protein Harvfovirus20_10	-	20	Harvfovirus sp.	Mimiviridae
TRSP28162.t1	73.5605	family 16 glycosylhydrolase	-	6	Planctomycetes bacterium	PVC group	TRSP3676.t1	94.637	hypothetical protein Harvfovirus20_10	-	1	Harvfovirus sp.	Mimiviridae
TRSP37052.t1	72.8326	hypothetical protein	-	14	Deltaproteobacteria bacterium	Proteobacteria	TRSP36793.t1	123.358	hypothetical protein Harvfovirus8_11	-	1	Harvfovirus sp.	Mimiviridae
TRSP8159.t1	72.7195	Uncharacterised protein	-	10	BD1-7 clade bacterium	Proteobacteria	TRSP37053.t1	85.7128	F-box domain protein	-	2	Indivirus ILV1	Mimiviridae
TRSP13554.t1	72.4175	iron-containing alcohol dehydrogenase	-	10	candidate division KSB3 bacterium	Bacteria candidate phyla	TRSP37656.t1	59.5711	hypothetical protein Catovirus_1_459	-	1	Catovirus CTV1	Mimiviridae
TRSP16706.t1	71.5024	DNA mismatch repair protein MutS	-	22	Luteithermobacter gelatinilyticus	Proteobacteria	TRSP37747.t1	88.073	hypothetical protein Harvfovirus36_1, partial	-	1	Harvfovirus sp.	Mimiviridae
TRSP11765.t1	71.4318	peptidyl-prolyl cis-trans isomerase	-	12	Phycisphaerales bacterium	PVC group	TRSP37750.t1	89.0868	hypothetical protein Harvfovirus36_1, partial	-	1	Harvfovirus sp.	Mimiviridae
TRSP25943.t1	71.2317	ricin-type beta-trefoil lectin domain protein	-	1	Aquimarina agarilytica	FCB group	TRSP37904.t1	105.051	hypothetical protein Harvfovirus36_1, partial	-	1	Harvfovirus sp.	Mimiviridae
TRSP36656.t1	71.017	RICIN domain-containing protein	-	13	Fulvivirga sp. M361	FCB group	TRSP37922.t1	51.2418	F-box domain protein	-	6	Indivirus ILV1	Mimiviridae
TRSP17247.t1	70.7907	class I SAM-dependent methyltransferase	-	10	Cupriavidus pauculus	Proteobacteria	TRSP37926.t1	91.6196	hypothetical protein Harvfovirus36_1, partial	-	1	Harvfovirus sp.	Mimiviridae
TRSP13369.t1	70.6586	NAD(P)H-hydrate epimerase	-	4	Melioribacter sp.	FCB group	TRSP37999.t1	49.3322	F-box domain protein	-	3	Indivirus ILV1	Mimiviridae
TRSP12733.t1	70.6329	nitronate monooxygenase	-	7	Bacillus sp. Y1	Terrabacteria group	TRSP38088.t1	60.7046	F-box domain protein	-	1	Indivirus ILV1	Mimiviridae
TRSP9753.t1	69.9814	hypothetical protein	-	5	Rhodoferax sp.	Proteobacteria	TRSP38365.t1	63.4302	hypothetical protein Hyperionvirus5_120	-	1	Hyperionvirus sp.	Mimiviridae
TRSP28718.t1	69.8738	T9SS type A sorting domain-containing protein	-	1	Aquimarina agarivorans	FCB group	TRSP38556.t1	133.811	hypothetical protein Harvfovirus20_10	-	1	Harvfovirus sp.	Mimiviridae
TRSP13920.t1	69.8124	YebC/PmpR family DNA-binding transcriptional regulator	-	8	Clostridiales bacterium	Terrabacteria group	TRSP3871.t1	48.532	hypothetical protein Catovirus_1_618	-	1	Catovirus CTV1	Mimiviridae
TRSP12520.t1	69.67	S8 family serine peptidase	-	12	Desulfovibrio senegalensis	Proteobacteria	TRSP3890.t1	127.055	hypothetical protein Hyperionvirus6_11	-	1	Hyperionvirus sp.	Mimiviridae
TRSP22430.t1	69.6592	hypothetical protein	-	2	Rhodoferax sp.	Proteobacteria	TRSP3898.t1	108.486	hypothetical protein Hyperionvirus5_103	-	1	Hyperionvirus sp.	Mimiviridae
TRSP23860.t1	69.4515	glyoxalase/bleomycin resistance/dioxygenase family protein	-	1	Aliiglaciecola lipolytica E3	Proteobacteria	TRSP3900.t1	93.5548	hypothetical protein Hyperionvirus5_103	-	2	Hyperionvirus sp.	Mimiviridae
TRSP20517.t1	69.1588	YebC/PmpR family DNA-binding transcriptional regulator	-	8	Clostridiales bacterium	Terrabacteria group	TRSP39393.t1	110.917	hypothetical protein Catovirus_1_561	-	1	Catovirus CTV1	Mimiviridae
TRSP20694.t1	69.1344	hypothetical protein	-	7	Candidatus Marinimicrobia bacterium	FCB group	TRSP39396.t1	45.0085	leucine-rich repeat protein	-	1	Pithovirus LCPAC101	Pithoviridae
TRSP25148.t1	68.8544	hypothetical protein	-	6	Zhongshania sp.	Proteobacteria	TRSP39418.t1	135.046	hypothetical protein Harvfovirus8_11	-	1	Harvfovirus sp.	Mimiviridae
TRSP10796.t1	68.4629	amino acid adenylation domain-containing protein	-	17	Symploca sp. SIO1A3	Terrabacteria group	TRSP3945.t1	145.678	hypothetical protein	-	1	Tupanvirus soda lake	Mimiviridae
TRSP12561.t1	67.9302	BMP family protein	-	14	Alcaligenes faecalis	Proteobacteria	TRSP39457.t1	72.3719	F-box domain protein	-	2	Indivirus ILV1	Mimiviridae
TRSP32866.t1	67.6314	amidohydrolase	-	5	Lentisphaeria bacterium	PVC group	TRSP39617.t1	46.4799	hypothetical protein Hyperionvirus1_57	-	2	Hyperionvirus sp.	Mimiviridae
TRSP33305.t1	67.3776	class I SAM-dependent methyltransferase	-	10	Cupriavidus pauculus	Proteobacteria	TRSP3972.t1	72.3225	hypothetical protein Harvfovirus20_10	-	2	Harvfovirus sp.	Mimiviridae
TRSP21314.t1	66.934	S8 family serine peptidase	-	14	Scytonema sp. NIES-4073	Terrabacteria group	TRSP39756.t1	63.0755	hypothetical protein Hyperionvirus5_103	-	2	Hyperionvirus sp.	Mimiviridae
TRSP29580.t1	66.8379	SUMF1/EgtB/PvdO family nonheme iron enzyme	-	6	Thermotogae bacterium	unclassified bacteria	TRSP39786.t1	97.3325	hypothetical protein Harvfovirus8_11	-	1	Harvfovirus sp.	Mimiviridae
TRSP21700.t1	66.815	ATP-dependent helicase	-	11	Gloeocapsopsis crepidinum LEGE 06123	Terrabacteria group	TRSP39921.t1	80.3783	hypothetical protein Harvfovirus36_1, partial	-	3	Harvfovirus sp.	Mimiviridae
TRSP29569.t1	66.5281	hypothetical protein D6706_05180, partial	-	18	Chloroflexi bacterium	Terrabacteria group	TRSP40023.t1	61.6266	hypothetical protein Harvfovirus30_3	-	1	Harvfovirus sp.	Mimiviridae
TRSP39440.t1	66.4056	glycoside hydrolase family 3 C-terminal domain-containing protein	-	23	Siphonobacter sp. BAB-5385	FCB group	TRSP40074.t1	85.1083	hypothetical protein Harvfovirus8_11	-	1	Harvfovirus sp.	Mimiviridae
TRSP24867.t1	66.1023	oxidoreductase	-	8	Ktedonobacterales bacterium SOSP1-1	Terrabacteria group	TRSP40175.t1	85.7595	hypothetical protein Harvfovirus8_11	-	2	Harvfovirus sp.	Mimiviridae
TRSP23535.t1	66.0495	HTTM domain-containing protein	-	7	Chloroflexi bacterium	Terrabacteria group	TRSP40177.t1	103.895	hypothetical protein Harvfovirus36_1, partial	-	1	Harvfovirus sp.	Mimiviridae
TRSP34181.t1	65.8627	hypothetical protein	-	1	Leptolyngbya sp. SIO3F4	Terrabacteria group	TRSP40196.t1	53.3805	hypothetical protein Hyperionvirus1_126	-	2	Hyperionvirus sp.	Mimiviridae
TRSP42087.t1	65.852	DUF427 domain-containing protein	-	0	Balneola sp.	FCB group	TRSP40205.t1	108.441	hypothetical protein Harvfovirus8_11	-	1	Harvfovirus sp.	Mimiviridae
TRSP8991.t1	65.3945	SMP-30/gluconolactonase/LRE family protein	-	6	Saprospiraceae bacterium	FCB group	TRSP40222.t1	89.7203	hypothetical protein	-	1	Tupanvirus soda lake	Mimiviridae
TRSP24670.t1	65.055	N-acetylmuramoyl-L-alanine amidase	-	0	Pseudomonas helleri	Proteobacteria	TRSP40290.t1	131.192	hypothetical protein	-	1	Tupanvirus soda lake	Mimiviridae
TRSP4951.t1	64.8952	glycosyltransferase family 1 protein	-	8	Okeania sp. SIO1F9	Terrabacteria group	TRSP40447.t1	90.6365	F-box domain protein	-	2	Marseillevirus LCMAC101	unclassified Marseilleviridae
TRSP7470.t1	64.4549	glutamine synthetase	-	18	filamentous cyanobacterium CCP2	Terrabacteria group	TRSP41140.t1	91.1976	hypothetical protein Harvfovirus30_3	-	1	Harvfovirus sp.	Mimiviridae
TRSP27103.t1	64.3933	class I SAM-dependent methyltransferase	-	10	Cupriavidus pauculus	Proteobacteria	TRSP41467.t1	146.105	hypothetical protein Hyperionvirus5_120	-	2	Hyperionvirus sp.	Mimiviridae
TRSP4392.t1	64.3933	class I SAM-dependent methyltransferase	-	10	Cupriavidus pauculus	Proteobacteria	TRSP41470.t1	100.563	hypothetical protein Harvfovirus8_11	-	1	Harvfovirus sp.	Mimiviridae
TRSP32906.t1	64.0669	MULTISPECIES: cupin domain-containing protein	-	4	Pseudomonas peli	Proteobacteria	TRSP41619.t1	86.6187	hypothetical protein Harvfovirus8_11	-	1	Harvfovirus sp.	Mimiviridae
TRSP16548.t1	64.0075	glutaminyl-peptide cyclotransferase	-	4	Xenococcus sp. PCC 7305	Terrabacteria group	TRSP41621.t1	61.0384	hypothetical protein Hyperionvirus5_120	-	1	Hyperionvirus sp.	Mimiviridae
TRSP14307.t1	63.9398	lactonase family protein	-	48	Verrucomicrobia bacterium	PVC group	TRSP4164.t1	88.0597	hypothetical protein Harvfovirus36_1, partial	-	1	Harvfovirus sp.	Mimiviridae
TRSP12283.t1	63.8572	dimethylmenaquinone methyltransferase	-	6	Chloroflexi bacterium	Terrabacteria group	TRSP41666.t1	77.0067	hypothetical protein Harvfovirus8_11	-	1	Harvfovirus sp.	Mimiviridae
TRSP4311.t1	63.7116	hypothetical protein	-	0	Alphaproteobacteria bacterium	Proteobacteria	TRSP4168.t1	82.4279	hypothetical protein Harvfovirus36_1, partial	-	1	Harvfovirus sp.	Mimiviridae
TRSP23619.t1	63.3359	phage tail protein	-	5	Polaribacter sp. Q13	FCB group	TRSP4176.t1	120.234	hypothetical protein Harvfovirus3_55	-	1	Harvfovirus sp.	Mimiviridae
TRSP32597.t1	63.1165	ricin-type beta-trefoil lectin domain protein	-	9	Aquimarina agarilytica	FCB group	TRSP4177.t1	73.5102	F-box domain protein	-	1	Indivirus ILV1	Mimiviridae
TRSP25590.t1	62.948	hypothetical protein	-	0	Algibacter aestuarii	FCB group	TRSP41897.t1	66.4813	hypothetical protein Hyperionvirus2_165	-	1	Hyperionvirus sp.	Mimiviridae
TRSP40354.t1	62.8774	NAD(P)/FAD-dependent oxidoreductase	-	10	Fischerella sp. PCC 9339	Terrabacteria group	TRSP41951.t1	120.066	hypothetical protein Harvfovirus8_11	-	1	Harvfovirus sp.	Mimiviridae
TRSP25638.t1	62.7384	family 16 glycosylhydrolase	-	8	Planctomycetes bacterium	PVC group	TRSP42043.t1	86.8734	F-box domain protein	-	1	Indivirus ILV1	Mimiviridae
TRSP30413.t1	62.7338	class I SAM-dependent methyltransferase	-	5	Leptolyngbya sp. FACHB-261	Terrabacteria group	TRSP42691.t1	73.0771	hypothetical protein Hyperionvirus1_152	-	2	Hyperionvirus sp.	Mimiviridae
TRSP18375.t1	62.6806	DUF1330 domain-containing protein	-	1	Vibrio owensii CAIM 1854 = LMG 25443	Proteobacteria	TRSP4292.t1	74.5284	hypothetical protein Harvfovirus36_1, partial	-	2	Harvfovirus sp.	Mimiviridae
TRSP15500.t1	62.1447	homocysteine S-methyltransferase family protein	-	6	Alphaproteobacteria bacterium	Proteobacteria	TRSP42926.t1	49.479	hypothetical protein Hyperionvirus5_120	-	14	Hyperionvirus sp.	Mimiviridae
TRSP20181.t1	62.006	ketoacyl-ACP synthase III	-	10	Candidatus Rokubacteria bacterium	Bacteria candidate phyla	TRSP43056.t1	139.308	hypothetical protein	-	9	Tupanvirus soda lake	Mimiviridae
TRSP27673.t1	61.8759	S8 family serine peptidase	-	14	Scytonema sp. NIES-4073	Terrabacteria group	TRSP43768.t1	70.3147	hypothetical protein Harvfovirus20_10	-	11	Harvfovirus sp.	Mimiviridae
TRSP11763.t1	61.8446	glutamine cyclotransferase	-	9	Caldithrix sp. RBG_13_44_9	unclassified bacteria	TRSP43800.t1	78.2299	hypothetical protein	-	1	Tupanvirus soda lake	Mimiviridae
TRSP43950.t1	61.8121	polyketide cyclase	-	1	Sneathiella sp.	Proteobacteria	TRSP43914.t1	53.7722	hypothetical protein Catovirus_1_601	-	3	Catovirus CTV1	Mimiviridae
TRSP15102.t1	61.6102	hypothetical protein OpiT1DRAFT_05530	-	24	Opitutaceae bacterium TAV1	PVC group	TRSP43927.t1	80.1246	hypothetical protein Hyperionvirus5_103	-	1	Hyperionvirus sp.	Mimiviridae
TRSP17796.t1	61.56	hypothetical protein	-	38	Symploca sp. SIO1C4	Terrabacteria group	TRSP43998.t1	47.2229	F-box domain protein	-	2	Indivirus ILV1	Mimiviridae
TRSP13231.t1	61.3525	glycerophosphodiester phosphodiesterase	-	2	Methylocaldum marinum	Proteobacteria	TRSP44152.t1	78.3857	F-box domain protein	-	1	Indivirus ILV1	Mimiviridae
TRSP30582.t1	61.0681	Gfo/Idh/MocA family oxidoreductase	-	7	Chloroflexi bacterium	Terrabacteria group	TRSP44460.t1	53.8671	hypothetical protein Catovirus_1_560	-	2	Catovirus CTV1	Mimiviridae
TRSP32179.t1	60.9881	hypothetical protein	-	11	bacterium	unclassified bacteria	TRSP44525.t1	58.3132	hypothetical protein Harvfovirus34_12	-	1	Harvfovirus sp.	Mimiviridae
TRSP30218.t1	60.9228	anti-sigma factor	-	4	Balneolaceae bacterium	FCB group	TRSP45122.t1	103.545	hypothetical protein Harvfovirus8_11	-	1	Harvfovirus sp.	Mimiviridae
TRSP17439.t1	60.3795	Predicted metal-dependent hydrolase, TIM-barrel fold	-	7	Variovorax sp. OV700	Proteobacteria	TRSP45284.t1	48.4377	hypothetical protein Hyperionvirus1_152	-	1	Hyperionvirus sp.	Mimiviridae
TRSP25973.t1	60.3795	Predicted metal-dependent hydrolase, TIM-barrel fold	-	7	Variovorax sp. OV700	Proteobacteria	TRSP4631.t1	147.685	hypothetical protein	-	3	Tupanvirus soda lake	Mimiviridae
TRSP10346.t1	60.0333	ThuA domain-containing protein	-	0	Aquimarina sp. Aq107	FCB group	TRSP4633.t1	57.8687	F-box domain protein	-	2	Indivirus ILV1	Mimiviridae
TRSP34225.t1	60.0192	TerB family tellurite resistance protein	-	2	Polyangium fumosum	Proteobacteria	TRSP4634.t1	51.6178	hypothetical protein Hyperionvirus3_153	-	1	Hyperionvirus sp.	Mimiviridae
TRSP36740.t1	60.0138	tail fiber protein	-	5	Polaribacter sp. BM10	FCB group	TRSP4760.t1	102.237	hypothetical protein	-	1	Tupanvirus soda lake	Mimiviridae
TRSP10918.t1	59.9748	hypothetical protein	-	3	Rhodoferax sp.	Proteobacteria	TRSP485.t1	85.2811	F-box domain protein	-	1	Indivirus ILV1	Mimiviridae
TRSP15927.t1	59.9473	nuclear transport factor 2 family protein	-	1	Aestuariicoccus sp. KMU-90	Proteobacteria	TRSP4953.t1	45.3586	F-box domain protein	-	1	Indivirus ILV1	Mimiviridae
TRSP44573.t1	59.848	SMP-30/gluconolactonase/LRE family protein	-	5	Dolichospermum circinale	Terrabacteria group	TRSP4980.t1	91.4042	hypothetical protein	-	1	Tupanvirus soda lake	Mimiviridae
TRSP44758.t1	59.5219	DUF427 domain-containing protein	-	9	Paenibacillus antibioticophila	Terrabacteria group	TRSP5065.t1	129.336	F-box domain protein	-	2	Marseillevirus LCMAC101	unclassified Marseilleviridae
TRSP32939.t1	59.435	glutaminyl-peptide cyclotransferase	-	7	Anaerolineae bacterium	Terrabacteria group	TRSP5254.t1	53.093	hypothetical protein Harvfovirus8_11	-	2	Harvfovirus sp.	Mimiviridae
TRSP9821.t1	59.0903	isoleucine--tRNA ligase	-	14	Candidatus Dependentiae bacterium	Bacteria candidate phyla	TRSP5279.t1	45.0698	hypothetical protein Catovirus_1_546	-	1	Catovirus CTV1	Mimiviridae
TRSP19735.t1	58.9633	carboxypeptidase regulatory-like domain-containing protein	-	125	Lewinella sp. 4G2	FCB group	TRSP5339.t1	127.52	hypothetical protein Harvfovirus8_11	-	1	Harvfovirus sp.	Mimiviridae
TRSP25604.t1	58.4393	hypothetical protein	-	13	Kiritimatiellae bacterium	PVC group	TRSP5392.t1	91.1976	hypothetical protein Harvfovirus30_3	-	1	Harvfovirus sp.	Mimiviridae
TRSP33503.t1	57.9057	glutathione S-transferase C-terminal domain-containing protein	-	7	Proteobacteria bacterium	Proteobacteria	TRSP5619.t1	120.933	hypothetical protein Harvfovirus20_10	-	1	Harvfovirus sp.	Mimiviridae
TRSP18983.t1	57.143	protein involved in biosynthesis of mitomycin antibiotics/polyketide fumonisin	-	7	Chthonomonas calidirosea	Terrabacteria group	TRSP5636.t1	136.271	hypothetical protein Harvfovirus8_11	-	1	Harvfovirus sp.	Mimiviridae
TRSP27025.t1	57.0639	ricin-type beta-trefoil lectin protein	-	13	Saccharopolyspora erythraea NRRL 2338	Terrabacteria group	TRSP5643.t1	136.6	hypothetical protein Harvfovirus8_11	-	1	Harvfovirus sp.	Mimiviridae
TRSP13819.t1	57.0039	hypothetical protein	-	5	Burkholderiales bacterium	Proteobacteria	TRSP6048.t1	158.521	hypothetical protein Hyperionvirus5_120	-	2	Hyperionvirus sp.	Mimiviridae
TRSP17318.t1	57.0039	hypothetical protein	-	5	Burkholderiales bacterium	Proteobacteria	TRSP6081.t1	89.2127	hypothetical protein Harvfovirus34_12	-	1	Harvfovirus sp.	Mimiviridae
TRSP11880.t1	56.8664	toxin-antitoxin system YwqK family antitoxin	-	1	Candidatus Thioglobus sp. NP1	Proteobacteria	TRSP6104.t1	96.5725	hypothetical protein Harvfovirus36_1, partial	-	1	Harvfovirus sp.	Mimiviridae
TRSP10559.t1	56.6364	twin-arginine translocation pathway signal protein	-	0	Leisingera sp. ANG-M1	Proteobacteria	TRSP6387.t1	92.4454	leucine-rich repeat protein	-	1	Pithovirus LCPAC101	Pithoviridae
TRSP30350.t1	56.5677	aspartyl beta-hydroxylase	-	0	Tenacibaculum mesophilum	FCB group	TRSP6557.t1	88.073	hypothetical protein Harvfovirus36_1, partial	-	1	Harvfovirus sp.	Mimiviridae
TRSP27474.t1	56.4208	NAD-dependent epimerase/dehydratase family protein	-	8	Chloroflexi bacterium	Terrabacteria group	TRSP6592.t1	107.843	hypothetical protein Harvfovirus20_10	-	5	Harvfovirus sp.	Mimiviridae
TRSP44570.t1	56.3119	polysaccharide lyase family 7 protein	-	3	Catenovulum agarivorans DS-2	Proteobacteria	TRSP6682.t1	93.8086	hypothetical protein Harvfovirus20_10	-	1	Harvfovirus sp.	Mimiviridae
TRSP1149.t1	56.1951	benzoate-CoA ligase family protein	-	17	Candidatus Tectomicrobia bacterium	unclassified bacteria	TRSP6684.t1	62.4535	hypothetical protein Harvfovirus20_10	-	7	Harvfovirus sp.	Mimiviridae
TRSP23607.t1	56.0847	tail fiber protein	-	5	Fabibacter sp. 4D4	FCB group	TRSP6708.t1	211.114	hypothetical protein Harvfovirus20_10	-	2	Harvfovirus sp.	Mimiviridae
TRSP16331.t1	55.5397	sulfatase-like hydrolase/transferase	-	15	Ekhidna sp.	FCB group	TRSP6739.t1	97.7368	hypothetical protein Hyperionvirus6_11	-	1	Hyperionvirus sp.	Mimiviridae
TRSP42492.t1	55.4559	hypothetical protein	-	7	Candidatus Kapabacteria bacterium	FCB group	TRSP7200.t1	106.235	hypothetical protein Hyperionvirus5_103	-	1	Hyperionvirus sp.	Mimiviridae
TRSP21701.t1	55.4376	carbohydrate-binding protein	-	3	Aquimarina pacifica	FCB group	TRSP7455.t1	96.7823	hypothetical protein Hyperionvirus5_103	-	1	Hyperionvirus sp.	Mimiviridae
TRSP26672.t1	54.7078	dioxygenase	-	3	SAR324 cluster bacterium	Proteobacteria	TRSP7527.t1	65.9098	hypothetical protein Hyperionvirus1_126	-	1	Hyperionvirus sp.	Mimiviridae
TRSP14157.t1	54.5942	SMP-30/gluconolactonase/LRE family protein	-	6	Dolichospermum circinale Clear-D4	Terrabacteria group	TRSP7709.t1	144.843	hypothetical protein Hyperionvirus5_120	-	1	Hyperionvirus sp.	Mimiviridae
TRSP21344.t1	54.5789	SRPBCC family protein	-	3	Deltaproteobacteria bacterium	Proteobacteria	TRSP7716.t1	96.2364	hypothetical protein	-	1	Tupanvirus soda lake	Mimiviridae
TRSP16609.t1	54.5264	toxin-antitoxin system YwqK family antitoxin	-	0	Seonamhaeicola aphaedonensis	FCB group	TRSP7913.t1	53.8501	hypothetical protein Catovirus_1_560	-	1	Catovirus CTV1	Mimiviridae
TRSP36451.t1	54.2875	SGNH/GDSL hydrolase family protein	-	5	Proteobacteria bacterium	Proteobacteria	TRSP8140.t1	82.1196	hypothetical protein Hyperionvirus5_103	-	2	Hyperionvirus sp.	Mimiviridae
TRSP40631.t1	54.1973	SGNH/GDSL hydrolase family protein	-	5	Acidobacteria bacterium	Acidobacteria	TRSP8280.t1	94.1356	hypothetical protein Harvfovirus20_10	-	1	Harvfovirus sp.	Mimiviridae
TRSP14787.t1	53.8757	heparinase	-	6	Candidatus Poribacteria bacterium	Bacteria candidate phyla	TRSP8519.t1	82.1972	F-box domain protein	-	1	Indivirus ILV1	Mimiviridae
TRSP3665.t1	53.6763	DHH family phosphoesterase	-	9	Spirochaeta isovalerica	unclassified bacteria	TRSP8648.t1	105.966	hypothetical protein Harvfovirus20_10	-	1	Harvfovirus sp.	Mimiviridae
TRSP29639.t1	53.23	RluA family pseudouridine synthase	-	5	Butyricicoccus pullicaecorum DSM 23266	Terrabacteria group	TRSP8656.t1	87.7459	F-box domain protein	-	2	Indivirus ILV1	Mimiviridae
TRSP18955.t1	52.9697	alkaline phosphatase family protein	-	12	Nafulsella turpanensis	FCB group	TRSP8749.t1	59.8184	F-box domain protein	-	2	Indivirus ILV1	Mimiviridae
TRSP1708.t1	52.8983	glycosyl hydrolase family protein	-	6	Planctomycetaceae bacterium	PVC group	TRSP8803.t1	56.4679	hypothetical protein Harvfovirus36_1, partial	-	1	Harvfovirus sp.	Mimiviridae
TRSP14531.t1	52.8166	protein-glutamate O-methyltransferase family protein	-	11	Microcoleus sp. FACHB-831	Terrabacteria group	TRSP8839.t1	72.6154	hypothetical protein Hyperionvirus5_120	-	1	Hyperionvirus sp.	Mimiviridae
TRSP29822.t1	52.5363	toxin-antitoxin system YwqK family antitoxin	-	0	Helicobacter equorum	Proteobacteria	TRSP8847.t1	92.2872	hypothetical protein Harvfovirus8_11	-	1	Harvfovirus sp.	Mimiviridae
TRSP22297.t1	52.291	2-hydroxychromene-2-carboxylate isomerase	-	5	Deltaproteobacteria bacterium	Proteobacteria	TRSP9024.t1	88.8048	hypothetical protein Harvfovirus8_11	-	1	Harvfovirus sp.	Mimiviridae
TRSP9877.t1	52.1676	hypothetical protein	-	0	Algibacter aestuarii	FCB group	TRSP9044.t1	136.103	hypothetical protein Harvfovirus8_11	-	1	Harvfovirus sp.	Mimiviridae
TRSP9469.t1	51.8664	AMP-binding protein	-	13	Firmicutes bacterium	Terrabacteria group	TRSP9054.t1	85.8259	hypothetical protein Hyperionvirus5_103	-	2	Hyperionvirus sp.	Mimiviridae
TRSP31996.t1	51.7747	hemin receptor	-	11	Methyloprofundus sp.	Proteobacteria	TRSP9185.t1	93.3739	hypothetical protein Harvfovirus8_11	-	1	Harvfovirus sp.	Mimiviridae
TRSP25141.t1	51.7651	alkaline phosphatase family protein	-	18	Nafulsella turpanensis	FCB group	TRSP9366.t1	94.7032	hypothetical protein Harvfovirus36_1, partial	-	2	Harvfovirus sp.	Mimiviridae
TRSP24482.t1	51.7475	DUF2589 domain-containing protein	-	3	Aquabacterium lacunae	Proteobacteria	TRSP9430.t1	85.5191	hypothetical protein Harvfovirus36_1, partial	-	1	Harvfovirus sp.	Mimiviridae
TRSP36331.t1	51.7124	hypothetical protein	-	8	Chloroflexi bacterium	Terrabacteria group	TRSP9522.t1	170.118	hypothetical protein Harvfovirus3_55	-	1	Harvfovirus sp.	Mimiviridae
TRSP21947.t1	51.6827	toxin-antitoxin system YwqK family antitoxin	-	0	Helicobacter pullorum	Proteobacteria	TRSP9531.t1	171.174	hypothetical protein Harvfovirus3_55	-	1	Harvfovirus sp.	Mimiviridae
TRSP17989.t1	51.4225	toxin-antitoxin system YwqK family antitoxin	-	0	Helicobacter pullorum	Proteobacteria	TRSP9532.t1	155.109	hypothetical protein Harvfovirus20_10	-	9	Harvfovirus sp.	Mimiviridae
TRSP18420.t1	51.379	porphobilinogen synthase	-	7	Verrucomicrobia bacterium	PVC group	TRSP9805.t1	122.262	RNA ligase	-	3	Pacmanvirus A23	unclassified viruses
TRSP14889.t1	51.1489	hypothetical protein	-	0	Alphaproteobacteria bacterium	Proteobacteria	TRSP9874.t1	111.804	hypothetical protein Harvfovirus36_1, partial	-	1	Harvfovirus sp.	Mimiviridae
TRSP11370.t1	50.8999	hypothetical protein	-	5	Algibacter aestuarii	FCB group	TRSP9913.t1	86.8407	hypothetical protein	-	1	Tupanvirus soda lake	Mimiviridae
TRSP12494.t1	50.8999	hypothetical protein	-	5	Algibacter aestuarii	FCB group	TRSP9957.t1	78.7774	F-box domain protein	-	1	Indivirus ILV1	Mimiviridae
TRSP15257.t1	50.6484	toxin-antitoxin system YwqK family antitoxin	-	0	Helicobacter pullorum	Proteobacteria	TRSP10019.t1	75.1108	hypothetical protein Harvfovirus36_1, partial	-	0	Harvfovirus sp.	Mimiviridae
TRSP11473.t1	50.4139	polysaccharide lyase family 7 protein	-	5	Pseudomonas sp. UL073	Proteobacteria	TRSP10025.t1	71.3929	hypothetical protein Harvfovirus20_10	-	0	Harvfovirus sp.	Mimiviridae
TRSP12521.t1	50.3204	S8 family serine peptidase	-	12	Desulfovibrio senegalensis	Proteobacteria	TRSP1013.t1	103.269	hypothetical protein Harvfovirus34_12	-	0	Harvfovirus sp.	Mimiviridae
TRSP11311.t1	50.245	DUF1295 domain-containing protein	-	3	Deltaproteobacteria bacterium	Proteobacteria	TRSP10234.t1	135.213	hypothetical protein Harvfovirus20_10	-	0	Harvfovirus sp.	Mimiviridae
TRSP24590.t1	50.1803	polysaccharide lyase family 7 protein	-	5	Pseudomonas sp. UL073	Proteobacteria	TRSP10290.t1	111.237	hypothetical protein Hyperionvirus5_120	-	0	Hyperionvirus sp.	Mimiviridae
TRSP3735.t1	50.1153	aminopeptidase	-	29	bacterium	unclassified bacteria	TRSP10543.t1	166.558	hypothetical protein	-	0	Tupanvirus soda lake	Mimiviridae
TRSP10479.t1	50.0691	hypothetical protein	-	2	Phycisphaerae bacterium	PVC group	TRSP10547.t1	156.4	hypothetical protein	-	0	Tupanvirus soda lake	Mimiviridae
TRSP27951.t1	49.9788	MULTISPECIES: tetratricopeptide repeat protein	-	9	unclassified Trichocoleus	Terrabacteria group	TRSP10586.t1	73.7135	hypothetical protein	-	0	Tupanvirus soda lake	Mimiviridae
TRSP17284.t1	49.92	amino acid ABC transporter substrate-binding protein	-	13	Gammaproteobacteria bacterium	Proteobacteria	TRSP10679.t1	117.774	hypothetical protein Harvfovirus20_10	-	0	Harvfovirus sp.	Mimiviridae
TRSP26484.t1	49.9149	winged helix DNA-binding domain-containing protein	-	8	Chloroflexi bacterium	Terrabacteria group	TRSP10686.t1	85.073	hypothetical protein Harvfovirus20_10	-	0	Harvfovirus sp.	Mimiviridae
TRSP26169.t1	49.8634	nitronate monooxygenase	-	7	Alicyclobacillus acidocaldarius LAA1	Terrabacteria group	TRSP10733.t1	100.961	hypothetical protein Harvfovirus36_1, partial	-	0	Harvfovirus sp.	Mimiviridae
TRSP27714.t1	49.7546	class 1 fructose-bisphosphatase	-	12	Nitrospiraceae bacterium	unclassified bacteria	TRSP10770.t1	96.4861	hypothetical protein Hyperionvirus5_120	-	0	Hyperionvirus sp.	Mimiviridae
TRSP16616.t1	49.5819	Hypothetical protein PBC10988_3460	-	3	Planctomycetales bacterium 10988	PVC group	TRSP1084.t1	55.819	leucine-rich repeat protein	-	0	Pithovirus LCPAC101	Pithoviridae
TRSP5241.t1	49.5179	toxin-antitoxin system YwqK family antitoxin	-	0	Algibacter aestuarii	FCB group	TRSP10890.t1	140.608	hypothetical protein Harvfovirus20_10	-	0	Harvfovirus sp.	Mimiviridae
TRSP26426.t1	49.4529	sulfatase-like hydrolase/transferase	-	15	Ekhidna sp.	FCB group	TRSP11032.t1	128.739	hypothetical protein Harvfovirus20_10	-	0	Harvfovirus sp.	Mimiviridae
TRSP14173.t1	49.4357	hypothetical protein	-	0	Helicobacter pullorum	Proteobacteria	TRSP11144.t1	122.571	hypothetical protein Harvfovirus8_11	-	0	Harvfovirus sp.	Mimiviridae
TRSP34272.t1	49.1979	2OG-Fe(II) oxygenase	-	6	Rhodospirillaceae bacterium	Proteobacteria	TRSP11163.t1	87.5321	F-box domain protein	-	0	Indivirus ILV1	Mimiviridae
TRSP13542.t1	49.1678	VacB/RNase II family 3'-5' exoribonuclease	-	2	Cyanobacteria bacterium FACHB-472	Terrabacteria group	TRSP11194.t1	113.913	hypothetical protein Harvfovirus20_10	-	0	Harvfovirus sp.	Mimiviridae
TRSP27428.t1	49.1113	N-acetyltransferase	-	0	Tissierellia sp. JN-28	Terrabacteria group	TRSP11213.t1	99.0053	hypothetical protein Harvfovirus20_10	-	0	Harvfovirus sp.	Mimiviridae
TRSP9936.t1	49.1093	methylase	-	8	Anaerolineae bacterium	Terrabacteria group	TRSP11240.t1	83.5486	hypothetical protein Harvfovirus8_11	-	0	Harvfovirus sp.	Mimiviridae
TRSP16395.t1	48.8841	toxin-antitoxin system YwqK family antitoxin	-	0	Helicobacter pullorum	Proteobacteria	TRSP11249.t1	60.2748	hypothetical protein	-	0	Tupanvirus soda lake	Mimiviridae
TRSP40333.t1	48.8802	hemin receptor	-	0	Coraliomargarita akajimensis	PVC group	TRSP11287.t1	89.6683	hypothetical protein Harvfovirus8_11	-	0	Harvfovirus sp.	Mimiviridae
TRSP42763.t1	48.7249	DJ-1/PfpI family protein	-	2	Betaproteobacteria bacterium	Proteobacteria	TRSP11481.t1	122.058	hypothetical protein	-	0	Tupanvirus soda lake	Mimiviridae
TRSP33525.t1	48.5743	replication-associated recombination protein A	-	7	Candidatus Uhrbacteria bacterium	Bacteria candidate phyla	TRSP11713.t1	50.1321	F-box domain protein	-	0	Indivirus ILV1	Mimiviridae
TRSP13342.t1	48.4543	toxin-antitoxin system YwqK family antitoxin	-	0	Fusobacterium periodonticum 1_1_41FAA	unclassified bacteria	TRSP11767.t1	91.918	hypothetical protein Harvfovirus20_10	-	0	Harvfovirus sp.	Mimiviridae
TRSP23181.t1	48.3774	polysaccharide lyase family 7 protein	-	5	Pseudomonas sp. UL073	Proteobacteria	TRSP11811.t1	107.682	hypothetical protein Harvfovirus20_10	-	0	Harvfovirus sp.	Mimiviridae
TRSP21355.t1	48.3558	hypothetical protein	-	0	Myxococcales bacterium	Proteobacteria	TRSP11945.t1	92.0145	hypothetical protein Catovirus_1_618	-	0	Catovirus CTV1	Mimiviridae
TRSP7338.t1	48.1412	D-glycero-beta-D-manno-heptose 1-phosphate adenylyltransferase	-	0	candidate division KSB1 bacterium	Bacteria candidate phyla	TRSP11956.t1	79.0355	hypothetical protein Catovirus_1_601	-	0	Catovirus CTV1	Mimiviridae
TRSP12518.t1	47.951	hypothetical protein	-	2	Alphaproteobacteria bacterium	Proteobacteria	TRSP11958.t1	65.4853	hypothetical protein Harvfovirus36_1, partial	-	0	Harvfovirus sp.	Mimiviridae
TRSP20731.t1	47.9305	polysaccharide lyase family 7 protein	-	5	Pseudomonas sp. UL073	Proteobacteria	TRSP12003.t1	57.4247	hypothetical protein	-	0	Tupanvirus soda lake	Mimiviridae
TRSP11485.t1	47.914	hypothetical protein	-	0	Gemmatimonadetes bacterium	FCB group	TRSP12008.t1	130.053	hypothetical protein	-	0	Tupanvirus soda lake	Mimiviridae
TRSP17443.t1	47.8851	cytosine deaminase	-	4	Spirosoma utsteinense	FCB group	TRSP12377.t1	105.875	hypothetical protein	-	0	Tupanvirus soda lake	Mimiviridae
TRSP19859.t1	47.7499	TauD/TfdA family dioxygenase	-	0	Bernardetia litoralis DSM 6794	FCB group	TRSP12388.t1	59.3056	hypothetical protein Harvfovirus5_25	-	0	Harvfovirus sp.	Mimiviridae
TRSP17155.t1	47.745	RidA family protein	-	2	Rhodothermaceae bacterium	FCB group	TRSP12457.t1	45.0846	leucine-rich repeat protein	-	0	Pithovirus LCPAC101	Pithoviridae
TRSP25002.t1	47.6813	SRPBCC family protein	-	3	Deltaproteobacteria bacterium	Proteobacteria	TRSP12458.t1	73.1255	hypothetical protein Harvfovirus36_1, partial	-	0	Harvfovirus sp.	Mimiviridae
TRSP23191.t1	47.6314	polysaccharide lyase family 7 protein	-	5	Pseudomonas sp. UL073	Proteobacteria	TRSP12464.t1	78.6214	F-box domain protein	-	0	Indivirus ILV1	Mimiviridae
TRSP14277.t1	47.6299	esterase	-	9	Aerococcus urinae	Terrabacteria group	TRSP12476.t1	95.2867	leucine-rich repeat protein	-	0	Pithovirus LCPAC101	Pithoviridae
TRSP12962.t1	47.6227	Zn-dependent hydrolase	-	11	Acidobacteria bacterium	Acidobacteria	TRSP12483.t1	68.5618	F-box domain protein	-	0	Indivirus ILV1	Mimiviridae
TRSP13213.t1	47.4447	glycoside hydrolase family 18 protein	-	10	Rhodothermaceae bacterium	FCB group	TRSP12501.t1	74.2349	hypothetical protein Harvfovirus36_1, partial	-	0	Harvfovirus sp.	Mimiviridae
TRSP22139.t1	47.3214	hypothetical protein	-	10	Herpetosiphon sp.	Terrabacteria group	TRSP12922.t1	138.472	hypothetical protein Harvfovirus20_10	-	0	Harvfovirus sp.	Mimiviridae
TRSP33598.t1	47.3105	hypothetical protein	-	12	Phormidium tenue FACHB-886	Terrabacteria group	TRSP12925.t1	70.0613	hypothetical protein Hyperionvirus6_11	-	0	Hyperionvirus sp.	Mimiviridae
TRSP20267.t1	47.148	toxin-antitoxin system YwqK family antitoxin	-	0	Luminiphilus syltensis NOR5-1B	Proteobacteria	TRSP12965.t1	166.369	hypothetical protein	-	0	Tupanvirus soda lake	Mimiviridae
TRSP11919.t1	47.0915	trypsin-like peptidase domain-containing protein	-	19	Flavobacterium sp. J27	FCB group	TRSP12980.t1	88.4976	hypothetical protein	-	0	Tupanvirus soda lake	Mimiviridae
TRSP3550.t1	47.0488	polysaccharide lyase family 7 protein	-	4	Pseudomonas sp. 8AS	Proteobacteria	TRSP12982.t1	109.808	hypothetical protein	-	0	Tupanvirus soda lake	Mimiviridae
TRSP30114.t1	47.0393	ATP-dependent zinc protease	-	5	Microbacterium sp. MYb72	Terrabacteria group	TRSP12996.t1	152.865	hypothetical protein Harvfovirus20_10	-	0	Harvfovirus sp.	Mimiviridae
TRSP22699.t1	47.0049	hypothetical protein	-	1	Alphaproteobacteria bacterium	Proteobacteria	TRSP13047.t1	51.2052	hypothetical protein Harvfovirus34_12	-	0	Harvfovirus sp.	Mimiviridae
TRSP17497.t1	46.8933	dTMP kinase	-	17	Elusimicrobia bacterium	unclassified bacteria	TRSP13072.t1	49.6263	hypothetical protein Hyperionvirus1_152	-	0	Hyperionvirus sp.	Mimiviridae
TRSP14143.t1	46.8784	hypothetical protein	-	0	Alphaproteobacteria bacterium	Proteobacteria	TRSP13080.t1	109.172	F-box domain protein	-	0	Marseillevirus LCMAC101	unclassified Marseilleviridae
TRSP8477.t1	46.7774	pentapeptide repeat-containing protein	-	0	Anabaena lutea FACHB-196	Terrabacteria group	TRSP13226.t1	83.2551	hypothetical protein Harvfovirus20_10	-	0	Harvfovirus sp.	Mimiviridae
TRSP35745.t1	46.5481	toxin-antitoxin system YwqK family antitoxin	-	0	Dysgonomonas sp. 511	FCB group	TRSP13257.t1	131.397	hypothetical protein Harvfovirus36_1, partial	-	0	Harvfovirus sp.	Mimiviridae
TRSP11846.t1	46.4466	hypothetical protein	-	0	Algibacter aestuarii	FCB group	TRSP13259.t1	57.8459	hypothetical protein Harvfovirus20_10	-	0	Harvfovirus sp.	Mimiviridae
TRSP14742.t1	46.3561	hypothetical protein	-	0	Helicobacter pullorum	Proteobacteria	TRSP13380.t1	66.1073	hypothetical protein Hyperionvirus6_11	-	0	Hyperionvirus sp.	Mimiviridae
TRSP9159.t1	46.3354	hypothetical protein	-	13	Kiritimatiellae bacterium	PVC group	TRSP13394.t1	67.4515	hypothetical protein Hyperionvirus6_11	-	0	Hyperionvirus sp.	Mimiviridae
TRSP29034.t1	46.212	hypothetical protein	-	0	Algibacter aestuarii	FCB group	TRSP13535.t1	86.872	hypothetical protein	-	0	Tupanvirus soda lake	Mimiviridae
TRSP41427.t1	46.1846	hypothetical protein	-	1	Algibacter aestuarii	FCB group	TRSP13544.t1	103.822	hypothetical protein	-	0	Tupanvirus soda lake	Mimiviridae
TRSP19901.t1	46.1423	polysaccharide lyase family 7 protein	-	5	Pseudomonas sp. UL073	Proteobacteria	TRSP13583.t1	123.489	hypothetical protein Harvfovirus36_1, partial	-	0	Harvfovirus sp.	Mimiviridae
TRSP23976.t1	46.1264	methyltransferase domain-containing protein	-	4	Alphaproteobacteria bacterium	Proteobacteria	TRSP13587.t1	104.922	hypothetical protein Catovirus_1_561	-	0	Catovirus CTV1	Mimiviridae
TRSP12541.t1	46.0791	S8 family serine peptidase	-	12	Amycolatopsis suaedae	Terrabacteria group	TRSP13595.t1	121.01	hypothetical protein Hyperionvirus5_120	-	0	Hyperionvirus sp.	Mimiviridae
TRSP25343.t1	46.0319	hypothetical protein	-	7	Archangium sp.	Proteobacteria	TRSP13597.t1	67.7859	hypothetical protein Harvfovirus20_10	-	0	Harvfovirus sp.	Mimiviridae
TRSP16743.t1	45.9655	hypothetical protein	-	3	Thermogutta sp.	PVC group	TRSP13662.t1	141.703	hypothetical protein Harvfovirus20_10	-	0	Harvfovirus sp.	Mimiviridae
TRSP29887.t1	45.9033	aminotransferase	-	3	Firmicutes bacterium	Terrabacteria group	TRSP13685.t1	142.185	hypothetical protein	-	0	Tupanvirus soda lake	Mimiviridae
TRSP3239.t1	45.9007	FGGY-family carbohydrate kinase	-	9	Caldilinea aerophila DSM 14535 = NBRC 104270	Terrabacteria group	TRSP13693.t1	59.4733	F-box domain protein	-	0	Indivirus ILV1	Mimiviridae
TRSP31336.t1	45.8919	toxin-antitoxin system YwqK family antitoxin	-	0	Helicobacter equorum	Proteobacteria	TRSP13737.t1	80.4531	hypothetical protein Hyperionvirus2_165	-	0	Hyperionvirus sp.	Mimiviridae
TRSP42006.t1	45.8536	polysaccharide lyase family 7 protein	-	4	Pseudomonas sp. UL073	Proteobacteria	TRSP13749.t1	95.4243	leucine-rich repeat protein	-	0	Pithovirus LCPAC101	Pithoviridae
TRSP28481.t1	45.8164	sugar ABC transporter substrate-binding protein	-	29	Chloroflexi bacterium	Terrabacteria group	TRSP13759.t1	62.4949	F-box domain protein	-	0	Indivirus ILV1	Mimiviridae
TRSP31880.t1	45.7158	cell division protein FtsZ	-	14	Firmicutes bacterium	Terrabacteria group	TRSP13774.t1	121.376	hypothetical protein Harvfovirus8_11	-	0	Harvfovirus sp.	Mimiviridae
TRSP1720.t1	45.7069	hypothetical protein	-	2	Alphaproteobacteria bacterium	Proteobacteria	TRSP13820.t1	81.1941	hypothetical protein Harvfovirus36_1, partial	-	0	Harvfovirus sp.	Mimiviridae
TRSP20757.t1	45.7039	polysaccharide lyase family 7 protein	-	5	Pseudomonas sp. UL073	Proteobacteria	TRSP13867.t1	115.811	hypothetical protein Harvfovirus36_1, partial	-	0	Harvfovirus sp.	Mimiviridae
TRSP11965.t1	45.6903	toxin-antitoxin system YwqK family antitoxin	-	0	Helicobacter pullorum	Proteobacteria	TRSP13875.t1	121.81	hypothetical protein Hyperionvirus5_120	-	0	Hyperionvirus sp.	Mimiviridae
TRSP27671.t1	45.6801	hypothetical protein	-	3	Aureliella helgolandensis	PVC group	TRSP13876.t1	92.4867	hypothetical protein Harvfovirus20_10	-	0	Harvfovirus sp.	Mimiviridae
TRSP11897.t1	45.4487	trypsin-like peptidase domain-containing protein	-	19	Flavobacterium sp. J27	FCB group	TRSP13879.t1	160.688	hypothetical protein	-	0	Tupanvirus soda lake	Mimiviridae
TRSP35022.t1	45.1849	toxin-antitoxin system YwqK family antitoxin	-	1	Algibacter aestuarii	FCB group	TRSP13896.t1	164.464	hypothetical protein	-	0	Tupanvirus soda lake	Mimiviridae
TRSP42048.t1	45.1771	UxaA family hydrolase	-	25	Rubrobacter xylanophilus	Terrabacteria group	TRSP13914.t1	91.1229	hypothetical protein Harvfovirus34_12	-	0	Harvfovirus sp.	Mimiviridae
TRSP16761.t1	45.1451	hypothetical protein	-	0	Algibacter aestuarii	FCB group	TRSP13928.t1	55.8382	hypothetical protein	-	0	Tupanvirus soda lake	Mimiviridae
TRSP12112.t1	45.1434	hypothetical protein A2Z44_08960	-	8	Betaproteobacteria bacterium RBG_19FT_COMBO_58_11	Proteobacteria	TRSP13965.t1	112.827	hypothetical protein Harvfovirus8_11	-	0	Harvfovirus sp.	Mimiviridae
TRSP26259.t1	45.0962	hypothetical protein COV79_05300	-	3	Parcubacteria group bacterium CG10_big_fil_rev_8_21_14_0_10_41_35	Bacteria candidate phyla	TRSP14015.t1	53.7425	hypothetical protein Catovirus_1_618	-	0	Catovirus CTV1	Mimiviridae
TRSP30882.t1	45.0457	hypothetical protein	-	0	Algibacter aestuarii	FCB group	TRSP14060.t1	97.2372	F-box domain protein	-	0	Marseillevirus LCMAC101	unclassified Marseilleviridae
TRSP18135.t1	45.0322	RluA family pseudouridine synthase	-	7	Spirochaetales bacterium	unclassified bacteria	TRSP14064.t1	111.094	F-box-like protein	-	0	Marseillevirus LCMAC101	unclassified Marseilleviridae
							TRSP14079.t1	73.0029	hypothetical protein	-	0	Tupanvirus soda lake	Mimiviridae
							TRSP14177.t1	118.39	hypothetical protein Harvfovirus36_1, partial	-	0	Harvfovirus sp.	Mimiviridae
							TRSP14222.t1	97.8465	hypothetical protein	-	0	Tupanvirus soda lake	Mimiviridae
							TRSP14292.t1	92.2105	hypothetical protein Harvfovirus36_1, partial	-	0	Harvfovirus sp.	Mimiviridae
							TRSP14339.t1	133.993	hypothetical protein Harvfovirus36_1, partial	-	0	Harvfovirus sp.	Mimiviridae
							TRSP14456.t1	76.1042	F-box domain protein	-	0	Indivirus ILV1	Mimiviridae
							TRSP14458.t1	84.908	hypothetical protein Harvfovirus20_10	-	0	Harvfovirus sp.	Mimiviridae
							TRSP14608.t1	51.2145	leucine-rich repeat protein	-	0	Pithovirus LCPAC101	Pithoviridae
							TRSP14832.t1	49.0947	hypothetical protein Harvfovirus36_1, partial	-	0	Harvfovirus sp.	Mimiviridae
							TRSP14840.t1	48.3151	hypothetical protein Hyperionvirus2_165	-	0	Hyperionvirus sp.	Mimiviridae
							TRSP14867.t1	141.683	hypothetical protein Harvfovirus20_10	-	0	Harvfovirus sp.	Mimiviridae
							TRSP14885.t1	59.843	F-box domain protein	-	0	Indivirus ILV1	Mimiviridae
							TRSP14898.t1	103.847	hypothetical protein Harvfovirus8_11	-	0	Harvfovirus sp.	Mimiviridae
							TRSP14985.t1	75.3973	hypothetical protein	-	0	Tupanvirus soda lake	Mimiviridae
							TRSP14989.t1	75.3973	hypothetical protein	-	0	Tupanvirus soda lake	Mimiviridae
							TRSP15053.t1	96.9693	leucine-rich repeat protein	-	0	Pithovirus LCPAC101	Pithoviridae
							TRSP15098.t1	143.784	hypothetical protein	-	0	Tupanvirus soda lake	Mimiviridae
							TRSP15101.t1	52.0357	F-box domain protein	-	0	Indivirus ILV1	Mimiviridae
							TRSP15109.t1	93.4812	hypothetical protein Harvfovirus20_10	-	0	Harvfovirus sp.	Mimiviridae
							TRSP15116.t1	134.063	hypothetical protein	-	0	Tupanvirus soda lake	Mimiviridae
							TRSP15224.t1	61.9779	hypothetical protein Harvfovirus34_12	-	0	Harvfovirus sp.	Mimiviridae
							TRSP15250.t1	48.4096	hypothetical protein Hyperionvirus36_2	-	0	Hyperionvirus sp.	Mimiviridae
							TRSP15261.t1	86.2607	F-box domain protein	-	0	Indivirus ILV1	Mimiviridae
							TRSP15315.t1	88.1743	hypothetical protein	-	0	Tupanvirus soda lake	Mimiviridae
							TRSP15317.t1	88.1743	hypothetical protein	-	0	Tupanvirus soda lake	Mimiviridae
							TRSP15461.t1	50.5085	hypothetical protein Harvfovirus20_10	-	0	Harvfovirus sp.	Mimiviridae
							TRSP15464.t1	160.218	hypothetical protein Harvfovirus20_10	-	0	Harvfovirus sp.	Mimiviridae
							TRSP15499.t1	101.698	hypothetical protein Harvfovirus20_10	-	0	Harvfovirus sp.	Mimiviridae
							TRSP15526.t1	69.3997	F-box domain protein	-	0	Indivirus ILV1	Mimiviridae
							TRSP15544.t1	60.7329	F-box domain protein	-	0	Indivirus ILV1	Mimiviridae
							TRSP15650.t1	45.4625	F-box domain protein	-	0	Indivirus ILV1	Mimiviridae
							TRSP15651.t1	50.6649	F-box domain protein	-	0	Indivirus ILV1	Mimiviridae
							TRSP15710.t1	94.2768	hypothetical protein	-	0	Tupanvirus soda lake	Mimiviridae
							TRSP15740.t1	114.05	hypothetical protein Harvfovirus36_1, partial	-	0	Harvfovirus sp.	Mimiviridae
							TRSP15747.t1	111.236	hypothetical protein Harvfovirus3_55	-	0	Harvfovirus sp.	Mimiviridae
							TRSP15823.t1	66.2543	F-box domain protein	-	0	Indivirus ILV1	Mimiviridae
							TRSP15838.t1	136.267	hypothetical protein Harvfovirus8_11	-	0	Harvfovirus sp.	Mimiviridae
							TRSP15885.t1	104.653	hypothetical protein	-	0	Tupanvirus soda lake	Mimiviridae
							TRSP15899.t1	90.4592	hypothetical protein	-	0	Tupanvirus soda lake	Mimiviridae
							TRSP15922.t1	110.487	hypothetical protein Hyperionvirus5_103	-	0	Hyperionvirus sp.	Mimiviridae
							TRSP15982.t1	51.6841	F-box domain protein	-	0	Indivirus ILV1	Mimiviridae
							TRSP16028.t1	123.937	hypothetical protein Harvfovirus8_11	-	0	Harvfovirus sp.	Mimiviridae
							TRSP16045.t1	165.984	hypothetical protein	-	0	Tupanvirus soda lake	Mimiviridae
							TRSP1609.t1	75.3973	hypothetical protein	-	0	Tupanvirus soda lake	Mimiviridae
							TRSP16172.t1	68.9131	F-box domain protein	-	0	Indivirus ILV1	Mimiviridae
							TRSP1619.t1	169.234	hypothetical protein	-	0	Tupanvirus soda lake	Mimiviridae
							TRSP16247.t1	83.0592	F-box domain protein	-	0	Indivirus ILV1	Mimiviridae
							TRSP16256.t1	121.17	hypothetical protein Hyperionvirus5_103	-	0	Hyperionvirus sp.	Mimiviridae
							TRSP16286.t1	84.3876	hypothetical protein	-	0	Tupanvirus soda lake	Mimiviridae
							TRSP16302.t1	88.5181	hypothetical protein Harvfovirus36_1, partial	-	0	Harvfovirus sp.	Mimiviridae
							TRSP16369.t1	77.6431	hypothetical protein Harvfovirus8_11	-	0	Harvfovirus sp.	Mimiviridae
							TRSP16411.t1	82.6054	F-box domain protein	-	0	Indivirus ILV1	Mimiviridae
							TRSP16448.t1	111.93	hypothetical protein Harvfovirus36_1, partial	-	0	Harvfovirus sp.	Mimiviridae
							TRSP16573.t1	115.163	hypothetical protein Harvfovirus8_11	-	0	Harvfovirus sp.	Mimiviridae
							TRSP16574.t1	53.2378	hypothetical protein Harvfovirus30_3	-	0	Harvfovirus sp.	Mimiviridae
							TRSP16650.t1	135.371	hypothetical protein Harvfovirus20_10	-	0	Harvfovirus sp.	Mimiviridae
							TRSP16694.t1	101.39	F-box domain protein	-	0	Indivirus ILV1	Mimiviridae
							TRSP16712.t1	170.654	hypothetical protein	-	0	Tupanvirus soda lake	Mimiviridae
							TRSP17055.t1	68.5452	hypothetical protein Harvfovirus8_11	-	0	Harvfovirus sp.	Mimiviridae
							TRSP17083.t1	104.295	hypothetical protein	-	0	Tupanvirus soda lake	Mimiviridae
							TRSP17127.t1	80.3352	hypothetical protein Harvfovirus36_1, partial	-	0	Harvfovirus sp.	Mimiviridae
							TRSP17137.t1	47.1901	MORN-repeat protein	-	0	Orpheovirus IHUMI-LCC2	unclassified viruses
							TRSP17165.t1	116.083	F-box domain protein	-	0	Indivirus ILV1	Mimiviridae
							TRSP17169.t1	128.506	hypothetical protein Harvfovirus3_55	-	0	Harvfovirus sp.	Mimiviridae
							TRSP17192.t1	95.5289	hypothetical protein Harvfovirus8_11	-	0	Harvfovirus sp.	Mimiviridae
							TRSP17196.t1	133.417	hypothetical protein Harvfovirus20_10	-	0	Harvfovirus sp.	Mimiviridae
							TRSP17202.t1	99.4683	hypothetical protein Harvfovirus8_11	-	0	Harvfovirus sp.	Mimiviridae
							TRSP17204.t1	130.714	hypothetical protein Harvfovirus20_10	-	0	Harvfovirus sp.	Mimiviridae
							TRSP17216.t1	87.5252	hypothetical protein Harvfovirus36_1, partial	-	0	Harvfovirus sp.	Mimiviridae
							TRSP17225.t1	150.797	hypothetical protein Catovirus_1_548	-	0	Catovirus CTV1	Mimiviridae
							TRSP17241.t1	157.572	hypothetical protein Harvfovirus20_10	-	0	Harvfovirus sp.	Mimiviridae
							TRSP17243.t1	101.829	hypothetical protein Harvfovirus8_11	-	0	Harvfovirus sp.	Mimiviridae
							TRSP17258.t1	82.5014	F-box domain protein	-	0	Indivirus ILV1	Mimiviridae
							TRSP17277.t1	62.9607	hypothetical protein Harvfovirus20_10	-	0	Harvfovirus sp.	Mimiviridae
							TRSP17317.t1	84.9432	hypothetical protein Harvfovirus36_1, partial	-	0	Harvfovirus sp.	Mimiviridae
							TRSP17391.t1	124.305	hypothetical protein	-	0	Tupanvirus soda lake	Mimiviridae
							TRSP17438.t1	158.012	hypothetical protein Harvfovirus20_10	-	0	Harvfovirus sp.	Mimiviridae
							TRSP17470.t1	65.3047	hypothetical protein Hyperionvirus5_103	-	0	Hyperionvirus sp.	Mimiviridae
							TRSP17606.t1	92.7044	hypothetical protein Harvfovirus8_11	-	0	Harvfovirus sp.	Mimiviridae
							TRSP18016.t1	154.781	hypothetical protein Hyperionvirus5_120	-	0	Hyperionvirus sp.	Mimiviridae
							TRSP18018.t1	198.526	hypothetical protein Harvfovirus3_55	-	0	Harvfovirus sp.	Mimiviridae
							TRSP18027.t1	110.644	hypothetical protein Harvfovirus34_12	-	0	Harvfovirus sp.	Mimiviridae
							TRSP18050.t1	65.5507	hypothetical protein Harvfovirus36_1, partial	-	0	Harvfovirus sp.	Mimiviridae
							TRSP18128.t1	124.216	hypothetical protein	-	0	Tupanvirus soda lake	Mimiviridae
							TRSP18236.t1	97.7915	hypothetical protein Harvfovirus20_10	-	0	Harvfovirus sp.	Mimiviridae
							TRSP18243.t1	106.635	hypothetical protein Harvfovirus8_11	-	0	Harvfovirus sp.	Mimiviridae
							TRSP18321.t1	45.6134	hypothetical protein Catovirus_1_561	-	0	Catovirus CTV1	Mimiviridae
							TRSP18325.t1	121.512	hypothetical protein Harvfovirus20_10	-	0	Harvfovirus sp.	Mimiviridae
							TRSP18326.t1	45.0696	F-box domain protein	-	0	Indivirus ILV1	Mimiviridae
							TRSP18374.t1	146.137	hypothetical protein Harvfovirus20_10	-	0	Harvfovirus sp.	Mimiviridae
							TRSP18426.t1	82.3507	hypothetical protein Harvfovirus20_10	-	0	Harvfovirus sp.	Mimiviridae
							TRSP1844.t1	63.9598	F-box domain protein	-	0	Indivirus ILV1	Mimiviridae
							TRSP18533.t1	82.9444	hypothetical protein Harvfovirus20_10	-	0	Harvfovirus sp.	Mimiviridae
							TRSP18707.t1	84.3048	hypothetical protein Harvfovirus8_11	-	0	Harvfovirus sp.	Mimiviridae
							TRSP18730.t1	102.327	hypothetical protein	-	0	Tupanvirus soda lake	Mimiviridae
							TRSP1878.t1	50.6993	hypothetical protein Hyperionvirus2_165	-	0	Hyperionvirus sp.	Mimiviridae
							TRSP1887.t1	47.698	hypothetical protein Hyperionvirus2_165	-	0	Hyperionvirus sp.	Mimiviridae
							TRSP1889.t1	77.9275	hypothetical protein Hyperionvirus5_44	-	0	Hyperionvirus sp.	Mimiviridae
							TRSP18981.t1	130.004	hypothetical protein Harvfovirus8_11	-	0	Harvfovirus sp.	Mimiviridae
							TRSP1899.t1	62.4166	hypothetical protein Hyperionvirus5_103	-	0	Hyperionvirus sp.	Mimiviridae
							TRSP19007.t1	109.621	hypothetical protein Harvfovirus8_11	-	0	Harvfovirus sp.	Mimiviridae
							TRSP1903.t1	70.4018	F-box domain protein	-	0	Indivirus ILV1	Mimiviridae
							TRSP19056.t1	114.582	hypothetical protein Harvfovirus36_1, partial	-	0	Harvfovirus sp.	Mimiviridae
							TRSP19091.t1	86.432	hypothetical protein Harvfovirus36_1, partial	-	0	Harvfovirus sp.	Mimiviridae
							TRSP19099.t1	156.606	hypothetical protein Harvfovirus20_10	-	0	Harvfovirus sp.	Mimiviridae
							TRSP19107.t1	133.238	hypothetical protein	-	0	Tupanvirus soda lake	Mimiviridae
							TRSP19119.t1	128.643	hypothetical protein	-	0	Tupanvirus soda lake	Mimiviridae
							TRSP1941.t1	46.2137	hypothetical protein Harvfovirus20_10	-	0	Harvfovirus sp.	Mimiviridae
							TRSP19486.t1	92.2447	hypothetical protein	-	0	Tupanvirus soda lake	Mimiviridae
							TRSP19631.t1	104.66	hypothetical protein Hyperionvirus5_120	-	0	Hyperionvirus sp.	Mimiviridae
							TRSP19654.t1	57.5471	hypothetical protein Hyperionvirus1_152	-	0	Hyperionvirus sp.	Mimiviridae
							TRSP19662.t1	93.747	hypothetical protein Harvfovirus3_55	-	0	Harvfovirus sp.	Mimiviridae
							TRSP19714.t1	65.9369	hypothetical protein Hyperionvirus5_103	-	0	Hyperionvirus sp.	Mimiviridae
							TRSP19716.t1	88.3954	F-box domain protein	-	0	Indivirus ILV1	Mimiviridae
							TRSP19745.t1	96.2256	hypothetical protein Hyperionvirus5_103	-	0	Hyperionvirus sp.	Mimiviridae
							TRSP19801.t1	151.638	hypothetical protein Harvfovirus20_10	-	0	Harvfovirus sp.	Mimiviridae
							TRSP20171.t1	45.8286	hypothetical protein Catovirus_1_618	-	0	Catovirus CTV1	Mimiviridae
							TRSP20174.t1	127.735	hypothetical protein Harvfovirus20_10	-	0	Harvfovirus sp.	Mimiviridae
							TRSP20193.t1	64.6743	F-box domain protein	-	0	Indivirus ILV1	Mimiviridae
							TRSP20197.t1	115.135	hypothetical protein Harvfovirus20_10	-	0	Harvfovirus sp.	Mimiviridae
							TRSP20219.t1	86.2361	F-box domain protein	-	0	Indivirus ILV1	Mimiviridae
							TRSP20277.t1	64.7942	hypothetical protein Catovirus_1_560	-	0	Catovirus CTV1	Mimiviridae
							TRSP20278.t1	75.7043	hypothetical protein Hyperionvirus5_103	-	0	Hyperionvirus sp.	Mimiviridae
							TRSP20281.t1	117.95	hypothetical protein Catovirus_1_561	-	0	Catovirus CTV1	Mimiviridae
							TRSP20293.t1	92.712	F-box domain protein	-	0	Indivirus ILV1	Mimiviridae
							TRSP20343.t1	104.124	hypothetical protein Hyperionvirus5_103	-	0	Hyperionvirus sp.	Mimiviridae
							TRSP20351.t1	129.802	cell division cycle 123 protein	-	0	Moumouvirus australiensis	Mimiviridae
							TRSP20387.t1	103.372	hypothetical protein Catovirus_1_618	-	0	Catovirus CTV1	Mimiviridae
							TRSP20405.t1	175.972	hypothetical protein	-	0	Tupanvirus soda lake	Mimiviridae
							TRSP20512.t1	88.8913	hypothetical protein Harvfovirus34_12	-	0	Harvfovirus sp.	Mimiviridae
							TRSP20570.t1	122.444	hypothetical protein	-	0	Tupanvirus soda lake	Mimiviridae
							TRSP20645.t1	149.512	hypothetical protein Harvfovirus20_10	-	0	Harvfovirus sp.	Mimiviridae
							TRSP20665.t1	109.862	hypothetical protein Harvfovirus8_11	-	0	Harvfovirus sp.	Mimiviridae
							TRSP20871.t1	97.9883	hypothetical protein Harvfovirus8_11	-	0	Harvfovirus sp.	Mimiviridae
							TRSP20959.t1	49.1353	hypothetical protein Hyperionvirus6_11	-	0	Hyperionvirus sp.	Mimiviridae
							TRSP20966.t1	71.7114	hypothetical protein Harvfovirus3_55	-	0	Harvfovirus sp.	Mimiviridae
							TRSP20967.t1	90.226	hypothetical protein Harvfovirus8_11	-	0	Harvfovirus sp.	Mimiviridae
							TRSP20986.t1	108.812	hypothetical protein Catovirus_1_561	-	0	Catovirus CTV1	Mimiviridae
							TRSP21004.t1	81.6121	hypothetical protein Harvfovirus8_11	-	0	Harvfovirus sp.	Mimiviridae
							TRSP21064.t1	92.0889	hypothetical protein Harvfovirus8_11	-	0	Harvfovirus sp.	Mimiviridae
							TRSP21072.t1	66.9707	hypothetical protein Hyperionvirus1_152	-	0	Hyperionvirus sp.	Mimiviridae
							TRSP21081.t1	97.5527	hypothetical protein Harvfovirus3_55	-	0	Harvfovirus sp.	Mimiviridae
							TRSP21208.t1	123.493	hypothetical protein	-	0	Tupanvirus soda lake	Mimiviridae
							TRSP21288.t1	75.2988	F-box domain protein	-	0	Indivirus ILV1	Mimiviridae
							TRSP21320.t1	64.0154	hypothetical protein	-	0	Tupanvirus soda lake	Mimiviridae
							TRSP21321.t1	67.6874	hypothetical protein	-	0	Tupanvirus soda lake	Mimiviridae
							TRSP21326.t1	122.878	hypothetical protein Harvfovirus8_11	-	0	Harvfovirus sp.	Mimiviridae
							TRSP21357.t1	78.012	hypothetical protein Harvfovirus36_1, partial	-	0	Harvfovirus sp.	Mimiviridae
							TRSP21454.t1	113.479	hypothetical protein Harvfovirus8_11	-	0	Harvfovirus sp.	Mimiviridae
							TRSP21503.t1	120.864	hypothetical protein Harvfovirus8_11	-	0	Harvfovirus sp.	Mimiviridae
							TRSP21513.t1	106.708	hypothetical protein Catovirus_1_618	-	0	Catovirus CTV1	Mimiviridae
							TRSP21558.t1	61.0465	hypothetical protein Hyperionvirus6_11	-	0	Hyperionvirus sp.	Mimiviridae
							TRSP21561.t1	120.34	hypothetical protein Harvfovirus8_11	-	0	Harvfovirus sp.	Mimiviridae
							TRSP21656.t1	79.1687	F-box domain protein	-	0	Indivirus ILV1	Mimiviridae
							TRSP21664.t1	93.005	hypothetical protein Hyperionvirus5_120	-	0	Hyperionvirus sp.	Mimiviridae
							TRSP21678.t1	151.616	hypothetical protein Harvfovirus20_10	-	0	Harvfovirus sp.	Mimiviridae
							TRSP21691.t1	50.4956	hypothetical protein Hyperionvirus1_126	-	0	Hyperionvirus sp.	Mimiviridae
							TRSP21714.t1	172.232	hypothetical protein Harvfovirus20_10	-	0	Harvfovirus sp.	Mimiviridae
							TRSP21719.t1	88.87	hypothetical protein Harvfovirus36_1, partial	-	0	Harvfovirus sp.	Mimiviridae
							TRSP21803.t1	88.4493	hypothetical protein Harvfovirus36_1, partial	-	0	Harvfovirus sp.	Mimiviridae
							TRSP21804.t1	70.0356	hypothetical protein Hyperionvirus6_11	-	0	Hyperionvirus sp.	Mimiviridae
							TRSP21818.t1	118.797	hypothetical protein Harvfovirus20_10	-	0	Harvfovirus sp.	Mimiviridae
							TRSP21836.t1	48.5219	leucine-rich repeat protein	-	0	Pithovirus LCPAC101	Pithoviridae
							TRSP22089.t1	115.241	hypothetical protein	-	0	Tupanvirus soda lake	Mimiviridae
							TRSP22154.t1	77.8422	hypothetical protein Harvfovirus20_10	-	0	Harvfovirus sp.	Mimiviridae
							TRSP22399.t1	136.312	hypothetical protein Harvfovirus20_10	-	0	Harvfovirus sp.	Mimiviridae
							TRSP22465.t1	94.4472	hypothetical protein Harvfovirus34_12	-	0	Harvfovirus sp.	Mimiviridae
							TRSP22497.t1	87.4492	hypothetical protein Harvfovirus20_10	-	0	Harvfovirus sp.	Mimiviridae
							TRSP22522.t1	122.565	hypothetical protein Harvfovirus8_11	-	0	Harvfovirus sp.	Mimiviridae
							TRSP22571.t1	49.8415	hypothetical protein Hyperionvirus1_174	-	0	Hyperionvirus sp.	Mimiviridae
							TRSP22581.t1	77.6038	hypothetical protein Harvfovirus36_1, partial	-	0	Harvfovirus sp.	Mimiviridae
							TRSP22657.t1	132.653	hypothetical protein Hyperionvirus6_11	-	0	Hyperionvirus sp.	Mimiviridae
							TRSP22719.t1	143.67	hypothetical protein Harvfovirus20_10	-	0	Harvfovirus sp.	Mimiviridae
							TRSP22746.t1	137.963	hypothetical protein Hyperionvirus5_120	-	0	Hyperionvirus sp.	Mimiviridae
							TRSP22810.t1	182.89	hypothetical protein	-	0	Tupanvirus soda lake	Mimiviridae
							TRSP22827.t1	132.458	hypothetical protein	-	0	Tupanvirus soda lake	Mimiviridae
							TRSP22834.t1	89.0704	hypothetical protein Hyperionvirus6_11	-	0	Hyperionvirus sp.	Mimiviridae
							TRSP22837.t1	85.399	F-box domain protein	-	0	Indivirus ILV1	Mimiviridae
							TRSP22851.t1	95.7006	hypothetical protein Harvfovirus36_1, partial	-	0	Harvfovirus sp.	Mimiviridae
							TRSP22863.t1	181.63	hypothetical protein	-	0	Tupanvirus soda lake	Mimiviridae
							TRSP22981.t1	123.763	hypothetical protein	-	0	Tupanvirus soda lake	Mimiviridae
							TRSP22992.t1	107.701	hypothetical protein Harvfovirus8_11	-	0	Harvfovirus sp.	Mimiviridae
							TRSP23003.t1	100.851	hypothetical protein Harvfovirus8_11	-	0	Harvfovirus sp.	Mimiviridae
							TRSP23019.t1	84.289	hypothetical protein Hyperionvirus5_120	-	0	Hyperionvirus sp.	Mimiviridae
							TRSP23022.t1	133.745	hypothetical protein Harvfovirus20_10	-	0	Harvfovirus sp.	Mimiviridae
							TRSP23024.t1	48.0919	F-box domain protein	-	0	Indivirus ILV1	Mimiviridae
							TRSP23032.t1	56.4862	hypothetical protein Harvfovirus36_1, partial	-	0	Harvfovirus sp.	Mimiviridae
							TRSP23033.t1	108.593	hypothetical protein Harvfovirus20_10	-	0	Harvfovirus sp.	Mimiviridae
							TRSP23058.t1	173.114	hypothetical protein Harvfovirus20_10	-	0	Harvfovirus sp.	Mimiviridae
							TRSP23062.t1	116.071	hypothetical protein Harvfovirus36_1, partial	-	0	Harvfovirus sp.	Mimiviridae
							TRSP23076.t1	138.986	hypothetical protein Harvfovirus20_10	-	0	Harvfovirus sp.	Mimiviridae
							TRSP23079.t1	58.9776	hypothetical protein Hyperionvirus6_11	-	0	Hyperionvirus sp.	Mimiviridae
							TRSP23085.t1	87.1182	hypothetical protein Hyperionvirus6_11	-	0	Hyperionvirus sp.	Mimiviridae
							TRSP23123.t1	75.7274	F-box domain protein	-	0	Indivirus ILV1	Mimiviridae
							TRSP23196.t1	94.8412	hypothetical protein Harvfovirus34_12	-	0	Harvfovirus sp.	Mimiviridae
							TRSP23212.t1	123.261	hypothetical protein Harvfovirus20_10	-	0	Harvfovirus sp.	Mimiviridae
							TRSP23256.t1	119.404	hypothetical protein Harvfovirus20_10	-	0	Harvfovirus sp.	Mimiviridae
							TRSP23257.t1	48.203	F-box domain protein	-	0	Indivirus ILV1	Mimiviridae
							TRSP23312.t1	117.518	hypothetical protein	-	0	Tupanvirus soda lake	Mimiviridae
							TRSP23323.t1	121.254	hypothetical protein Harvfovirus8_11	-	0	Harvfovirus sp.	Mimiviridae
							TRSP23325.t1	126.626	hypothetical protein Harvfovirus8_11	-	0	Harvfovirus sp.	Mimiviridae
							TRSP23339.t1	118.146	hypothetical protein Harvfovirus8_11	-	0	Harvfovirus sp.	Mimiviridae
							TRSP23363.t1	103.823	hypothetical protein	-	0	Tupanvirus soda lake	Mimiviridae
							TRSP23368.t1	155.051	hypothetical protein Harvfovirus3_55	-	0	Harvfovirus sp.	Mimiviridae
							TRSP23370.t1	107.676	hypothetical protein Harvfovirus36_1, partial	-	0	Harvfovirus sp.	Mimiviridae
							TRSP23382.t1	93.6838	hypothetical protein	-	0	Tupanvirus soda lake	Mimiviridae
							TRSP23433.t1	132.885	hypothetical protein Harvfovirus36_1, partial	-	0	Harvfovirus sp.	Mimiviridae
							TRSP23438.t1	80.5407	hypothetical protein Harvfovirus36_1, partial	-	0	Harvfovirus sp.	Mimiviridae
							TRSP23494.t1	61.4831	hypothetical protein Harvfovirus5_25	-	0	Harvfovirus sp.	Mimiviridae
							TRSP23495.t1	104.837	hypothetical protein Harvfovirus8_11	-	0	Harvfovirus sp.	Mimiviridae
							TRSP23696.t1	46.3293	hypothetical protein Catovirus_1_459	-	0	Catovirus CTV1	Mimiviridae
							TRSP23711.t1	185.486	hypothetical protein	-	0	Tupanvirus soda lake	Mimiviridae
							TRSP23863.t1	106.533	hypothetical protein Hyperionvirus5_120	-	0	Hyperionvirus sp.	Mimiviridae
							TRSP23876.t1	53.463	putative ankyrin repeat protein	-	0	Acanthamoeba polyphaga mimivirus	Mimiviridae
							TRSP24026.t1	164.139	hypothetical protein Harvfovirus36_1, partial	-	0	Harvfovirus sp.	Mimiviridae
							TRSP24035.t1	143.249	hypothetical protein Harvfovirus8_11	-	0	Harvfovirus sp.	Mimiviridae
							TRSP24053.t1	85.139	hypothetical protein Hyperionvirus5_120	-	0	Hyperionvirus sp.	Mimiviridae
							TRSP24159.t1	69.5673	hypothetical protein Hyperionvirus5_103	-	0	Hyperionvirus sp.	Mimiviridae
							TRSP24254.t1	45.8541	hypothetical protein Catovirus_1_618	-	0	Catovirus CTV1	Mimiviridae
							TRSP24301.t1	78.4332	hypothetical protein Hyperionvirus5_103	-	0	Hyperionvirus sp.	Mimiviridae
							TRSP24412.t1	71.7309	hypothetical protein Catovirus_1_618	-	0	Catovirus CTV1	Mimiviridae
							TRSP24421.t1	115.078	hypothetical protein Harvfovirus8_11	-	0	Harvfovirus sp.	Mimiviridae
							TRSP24428.t1	59.6065	hypothetical protein Harvfovirus36_1, partial	-	0	Harvfovirus sp.	Mimiviridae
							TRSP24431.t1	63.2742	hypothetical protein Harvfovirus20_10	-	0	Harvfovirus sp.	Mimiviridae
							TRSP24434.t1	125.827	hypothetical protein Harvfovirus8_11	-	0	Harvfovirus sp.	Mimiviridae
							TRSP24435.t1	55.3967	F-box domain protein	-	0	Indivirus ILV1	Mimiviridae
							TRSP24536.t1	53.7782	hypothetical protein Harvfovirus14_33	-	0	Harvfovirus sp.	Mimiviridae
							TRSP24578.t1	68.1252	hypothetical protein	-	0	Tupanvirus soda lake	Mimiviridae
							TRSP24587.t1	101.122	hypothetical protein Hyperionvirus5_120	-	0	Hyperionvirus sp.	Mimiviridae
							TRSP24794.t1	128.47	hypothetical protein	-	0	Tupanvirus soda lake	Mimiviridae
							TRSP24809.t1	56.4634	F-box domain protein	-	0	Indivirus ILV1	Mimiviridae
							TRSP24880.t1	104.248	hypothetical protein	-	0	Tupanvirus soda lake	Mimiviridae
							TRSP24990.t1	89.6329	hypothetical protein Hyperionvirus6_11	-	0	Hyperionvirus sp.	Mimiviridae
							TRSP25001.t1	74.0341	F-box domain protein	-	0	Indivirus ILV1	Mimiviridae
							TRSP25091.t1	93.5392	hypothetical protein Harvfovirus8_11	-	0	Harvfovirus sp.	Mimiviridae
							TRSP25099.t1	131.49	hypothetical protein Harvfovirus8_11	-	0	Harvfovirus sp.	Mimiviridae
							TRSP25118.t1	107.425	hypothetical protein Hyperionvirus6_11	-	0	Hyperionvirus sp.	Mimiviridae
							TRSP25531.t1	125.448	hypothetical protein Harvfovirus3_55	-	0	Harvfovirus sp.	Mimiviridae
							TRSP25640.t1	114.564	hypothetical protein	-	0	Tupanvirus soda lake	Mimiviridae
							TRSP25741.t1	108.526	hypothetical protein Hyperionvirus5_103	-	0	Hyperionvirus sp.	Mimiviridae
							TRSP25747.t1	50.2314	hypothetical protein Hyperionvirus1_57	-	0	Hyperionvirus sp.	Mimiviridae
							TRSP25749.t1	135.579	hypothetical protein Harvfovirus20_10	-	0	Harvfovirus sp.	Mimiviridae
							TRSP25763.t1	47.1093	leucine-rich repeat protein	-	0	Pithovirus LCPAC101	Pithoviridae
							TRSP25766.t1	81.3463	hypothetical protein Harvfovirus8_11	-	0	Harvfovirus sp.	Mimiviridae
							TRSP25911.t1	89.2376	hypothetical protein	-	0	Tupanvirus soda lake	Mimiviridae
							TRSP25913.t1	95.6047	hypothetical protein	-	0	Tupanvirus soda lake	Mimiviridae
							TRSP25951.t1	75.0103	hypothetical protein	-	0	Tupanvirus soda lake	Mimiviridae
							TRSP25975.t1	90.1067	hypothetical protein Harvfovirus20_10	-	0	Harvfovirus sp.	Mimiviridae
							TRSP26028.t1	59.7539	hypothetical protein Hyperionvirus5_120	-	0	Hyperionvirus sp.	Mimiviridae
							TRSP26030.t1	135.166	hypothetical protein Harvfovirus8_11	-	0	Harvfovirus sp.	Mimiviridae
							TRSP26079.t1	121.41	hypothetical protein	-	0	Tupanvirus soda lake	Mimiviridae
							TRSP26213.t1	57.6545	hypothetical protein LCPAC302_00910	-	0	Pithovirus LCPAC302	Pithoviridae
							TRSP26218.t1	47.5881	F-box domain protein	-	0	Indivirus ILV1	Mimiviridae
							TRSP26273.t1	86.4191	hypothetical protein	-	0	Tupanvirus soda lake	Mimiviridae
							TRSP26355.t1	81.495	hypothetical protein Harvfovirus36_1, partial	-	0	Harvfovirus sp.	Mimiviridae
							TRSP26394.t1	87.6205	F-box domain protein	-	0	Indivirus ILV1	Mimiviridae
							TRSP26403.t1	116.509	hypothetical protein Harvfovirus34_12	-	0	Harvfovirus sp.	Mimiviridae
							TRSP26444.t1	121.895	hypothetical protein Harvfovirus8_11	-	0	Harvfovirus sp.	Mimiviridae
							TRSP26566.t1	121.41	hypothetical protein	-	0	Tupanvirus soda lake	Mimiviridae
							TRSP26701.t1	110.588	hypothetical protein Harvfovirus8_11	-	0	Harvfovirus sp.	Mimiviridae
							TRSP26702.t1	56.973	hypothetical protein Hyperionvirus5_120	-	0	Hyperionvirus sp.	Mimiviridae
							TRSP26707.t1	195.583	hypothetical protein Harvfovirus20_10	-	0	Harvfovirus sp.	Mimiviridae
							TRSP26713.t1	56.5394	hypothetical protein	-	0	Tupanvirus soda lake	Mimiviridae
							TRSP26722.t1	118.41	hypothetical protein Harvfovirus20_10	-	0	Harvfovirus sp.	Mimiviridae
							TRSP26755.t1	63.2089	hypothetical protein Hyperionvirus1_152	-	0	Hyperionvirus sp.	Mimiviridae
							TRSP26809.t1	104.451	hypothetical protein Harvfovirus20_10	-	0	Harvfovirus sp.	Mimiviridae
							TRSP26824.t1	87.5038	hypothetical protein Hyperionvirus6_11	-	0	Hyperionvirus sp.	Mimiviridae
							TRSP26889.t1	47.9967	F-box domain protein	-	0	Indivirus ILV1	Mimiviridae
							TRSP26987.t1	108.888	hypothetical protein Harvfovirus8_11	-	0	Harvfovirus sp.	Mimiviridae
							TRSP26994.t1	137.205	hypothetical protein Harvfovirus3_55	-	0	Harvfovirus sp.	Mimiviridae
							TRSP27101.t1	53.1795	hypothetical protein Harvfovirus30_3	-	0	Harvfovirus sp.	Mimiviridae
							TRSP27113.t1	119.346	hypothetical protein Harvfovirus36_1, partial	-	0	Harvfovirus sp.	Mimiviridae
							TRSP27133.t1	82.2282	hypothetical protein Harvfovirus36_1, partial	-	0	Harvfovirus sp.	Mimiviridae
							TRSP27189.t1	84.2517	hypothetical protein Harvfovirus30_3	-	0	Harvfovirus sp.	Mimiviridae
							TRSP27252.t1	142.043	hypothetical protein Harvfovirus36_1, partial	-	0	Harvfovirus sp.	Mimiviridae
							TRSP27274.t1	114.927	leucine-rich repeat protein	-	0	Pithovirus LCPAC101	Pithoviridae
							TRSP27301.t1	73.1288	hypothetical protein Harvfovirus30_3	-	0	Harvfovirus sp.	Mimiviridae
							TRSP27402.t1	151.819	hypothetical protein Harvfovirus20_10	-	0	Harvfovirus sp.	Mimiviridae
							TRSP27413.t1	53.1252	hypothetical protein	-	0	Tupanvirus soda lake	Mimiviridae
							TRSP27462.t1	106.821	hypothetical protein Harvfovirus36_1, partial	-	0	Harvfovirus sp.	Mimiviridae
							TRSP27717.t1	85.9086	F-box domain protein	-	0	Indivirus ILV1	Mimiviridae
							TRSP27762.t1	77.1701	F-box domain protein	-	0	Indivirus ILV1	Mimiviridae
							TRSP27876.t1	102.998	hypothetical protein Harvfovirus8_11	-	0	Harvfovirus sp.	Mimiviridae
							TRSP27941.t1	136.975	hypothetical protein Harvfovirus20_10	-	0	Harvfovirus sp.	Mimiviridae
							TRSP27986.t1	109.091	hypothetical protein Harvfovirus36_1, partial	-	0	Harvfovirus sp.	Mimiviridae
							TRSP28192.t1	75.9853	hypothetical protein Harvfovirus8_11	-	0	Harvfovirus sp.	Mimiviridae
							TRSP28201.t1	75.5784	hypothetical protein Harvfovirus8_11	-	0	Harvfovirus sp.	Mimiviridae
							TRSP28272.t1	108.911	hypothetical protein Hyperionvirus6_11	-	0	Hyperionvirus sp.	Mimiviridae
							TRSP28283.t1	53.0626	F-box domain protein	-	0	Indivirus ILV1	Mimiviridae
							TRSP28293.t1	85.8935	F-box domain protein	-	0	Indivirus ILV1	Mimiviridae
							TRSP28360.t1	132.336	hypothetical protein Harvfovirus20_10	-	0	Harvfovirus sp.	Mimiviridae
							TRSP28495.t1	123.186	protein of unknown function DUF4343	-	0	Marseillevirus LCMAC201	unclassified Marseilleviridae
							TRSP28503.t1	142.77	hypothetical protein	-	0	Tupanvirus soda lake	Mimiviridae
							TRSP28545.t1	138.684	hypothetical protein Harvfovirus20_10	-	0	Harvfovirus sp.	Mimiviridae
							TRSP28552.t1	141.602	hypothetical protein Harvfovirus3_55	-	0	Harvfovirus sp.	Mimiviridae
							TRSP28557.t1	88.4899	hypothetical protein Harvfovirus34_12	-	0	Harvfovirus sp.	Mimiviridae
							TRSP28608.t1	87.377	hypothetical protein Hyperionvirus6_11	-	0	Hyperionvirus sp.	Mimiviridae
							TRSP28624.t1	63.7951	F-box domain protein	-	0	Indivirus ILV1	Mimiviridae
							TRSP28633.t1	102.593	hypothetical protein Harvfovirus3_55	-	0	Harvfovirus sp.	Mimiviridae
							TRSP2864.t1	96.4215	F-box domain protein	-	0	Indivirus ILV1	Mimiviridae
							TRSP28677.t1	45.7327	hypothetical protein Catovirus_1_459	-	0	Catovirus CTV1	Mimiviridae
							TRSP28700.t1	101.22	hypothetical protein Harvfovirus36_1, partial	-	0	Harvfovirus sp.	Mimiviridae
							TRSP28713.t1	100.008	leucine-rich repeat protein	-	0	Pithovirus LCPAC101	Pithoviridae
							TRSP28733.t1	76.3944	F-box domain protein	-	0	Indivirus ILV1	Mimiviridae
							TRSP2876.t1	79.5098	hypothetical protein Catovirus_1_561	-	0	Catovirus CTV1	Mimiviridae
							TRSP2880.t1	163.125	hypothetical protein	-	0	Tupanvirus soda lake	Mimiviridae
							TRSP28825.t1	97.0743	hypothetical protein	-	0	Tupanvirus soda lake	Mimiviridae
							TRSP28826.t1	150.389	hypothetical protein	-	0	Tupanvirus soda lake	Mimiviridae
							TRSP28840.t1	78.9332	hypothetical protein Hyperionvirus6_11	-	0	Hyperionvirus sp.	Mimiviridae
							TRSP28866.t1	79.698	hypothetical protein Harvfovirus8_11	-	0	Harvfovirus sp.	Mimiviridae
							TRSP29025.t1	166.04	hypothetical protein	-	0	Tupanvirus soda lake	Mimiviridae
							TRSP29098.t1	183.737	hypothetical protein	-	0	Tupanvirus soda lake	Mimiviridae
							TRSP29220.t1	70.89	hypothetical protein Harvfovirus36_1, partial	-	0	Harvfovirus sp.	Mimiviridae
							TRSP29222.t1	88.9681	hypothetical protein Harvfovirus20_10	-	0	Harvfovirus sp.	Mimiviridae
							TRSP29227.t1	55.5448	hypothetical protein Harvfovirus36_1, partial	-	0	Harvfovirus sp.	Mimiviridae
							TRSP29233.t1	107.32	hypothetical protein Hyperionvirus6_11	-	0	Hyperionvirus sp.	Mimiviridae
							TRSP29267.t1	96.2087	hypothetical protein Harvfovirus36_1, partial	-	0	Harvfovirus sp.	Mimiviridae
							TRSP29284.t1	100.669	hypothetical protein Hyperionvirus5_103	-	0	Hyperionvirus sp.	Mimiviridae
							TRSP29306.t1	87.1971	hypothetical protein	-	0	Tupanvirus soda lake	Mimiviridae
							TRSP29311.t1	94.008	F-box domain protein	-	0	Indivirus ILV1	Mimiviridae
							TRSP29312.t1	47.6562	hypothetical protein Hyperionvirus5_103	-	0	Hyperionvirus sp.	Mimiviridae
							TRSP29319.t1	135.579	hypothetical protein Harvfovirus20_10	-	0	Harvfovirus sp.	Mimiviridae
							TRSP29321.t1	50.2314	hypothetical protein Hyperionvirus1_57	-	0	Hyperionvirus sp.	Mimiviridae
							TRSP29322.t1	106.925	F-box domain protein	-	0	Marseillevirus LCMAC101	unclassified Marseilleviridae
							TRSP29325.t1	76.3814	hypothetical protein Harvfovirus36_1, partial	-	0	Harvfovirus sp.	Mimiviridae
							TRSP29382.t1	96.1861	hypothetical protein Harvfovirus8_11	-	0	Harvfovirus sp.	Mimiviridae
							TRSP29423.t1	69.9236	F-box domain protein	-	0	Indivirus ILV1	Mimiviridae
							TRSP29472.t1	102.133	hypothetical protein Harvfovirus20_10	-	0	Harvfovirus sp.	Mimiviridae
							TRSP29507.t1	159.605	hypothetical protein Harvfovirus8_11	-	0	Harvfovirus sp.	Mimiviridae
							TRSP29546.t1	110.464	hypothetical protein Harvfovirus20_10	-	0	Harvfovirus sp.	Mimiviridae
							TRSP29593.t1	116.284	hypothetical protein Harvfovirus20_10	-	0	Harvfovirus sp.	Mimiviridae
							TRSP29597.t1	123.493	hypothetical protein	-	0	Tupanvirus soda lake	Mimiviridae
							TRSP29666.t1	189.478	hypothetical protein Harvfovirus20_10	-	0	Harvfovirus sp.	Mimiviridae
							TRSP29829.t1	54.6045	hypothetical protein Hyperionvirus6_87	-	0	Hyperionvirus sp.	Mimiviridae
							TRSP29849.t1	99.1271	hypothetical protein Harvfovirus34_12	-	0	Harvfovirus sp.	Mimiviridae
							TRSP29870.t1	60.2069	hypothetical protein Hyperionvirus6_87	-	0	Hyperionvirus sp.	Mimiviridae
							TRSP29874.t1	175.81	hypothetical protein Harvfovirus20_10	-	0	Harvfovirus sp.	Mimiviridae
							TRSP30041.t1	89.2602	hypothetical protein Harvfovirus8_11	-	0	Harvfovirus sp.	Mimiviridae
							TRSP30233.t1	107.367	hypothetical protein	-	0	Tupanvirus soda lake	Mimiviridae
							TRSP30248.t1	123.689	hypothetical protein Harvfovirus8_11	-	0	Harvfovirus sp.	Mimiviridae
							TRSP30355.t1	122.531	hypothetical protein	-	0	Tupanvirus soda lake	Mimiviridae
							TRSP30362.t1	47.7262	hypothetical protein Harvfovirus20_10	-	0	Harvfovirus sp.	Mimiviridae
							TRSP30707.t1	63.4903	F-box domain protein	-	0	Indivirus ILV1	Mimiviridae
							TRSP30713.t1	64.7655	F-box domain protein	-	0	Indivirus ILV1	Mimiviridae
							TRSP30853.t1	89.7918	F-box domain protein	-	0	Indivirus ILV1	Mimiviridae
							TRSP30865.t1	99.0112	hypothetical protein	-	0	Tupanvirus soda lake	Mimiviridae
							TRSP31292.t1	148.487	hypothetical protein	-	0	Tupanvirus soda lake	Mimiviridae
							TRSP31297.t1	61.9105	hypothetical protein Hyperionvirus1_152	-	0	Hyperionvirus sp.	Mimiviridae
							TRSP31314.t1	98.9416	hypothetical protein Harvfovirus20_10	-	0	Harvfovirus sp.	Mimiviridae
							TRSP31335.t1	80.6136	hypothetical protein Hyperionvirus5_120	-	0	Hyperionvirus sp.	Mimiviridae
							TRSP31343.t1	77.2269	F-box domain protein	-	0	Indivirus ILV1	Mimiviridae
							TRSP31353.t1	137.005	hypothetical protein	-	0	Tupanvirus soda lake	Mimiviridae
							TRSP31360.t1	56.8902	hypothetical protein	-	0	Tupanvirus soda lake	Mimiviridae
							TRSP31388.t1	91.9353	hypothetical protein Harvfovirus8_11	-	0	Harvfovirus sp.	Mimiviridae
							TRSP31394.t1	151.142	hypothetical protein	-	0	Tupanvirus soda lake	Mimiviridae
							TRSP31400.t1	79.7199	F-box domain protein	-	0	Indivirus ILV1	Mimiviridae
							TRSP31401.t1	126.254	hypothetical protein Hyperionvirus5_120	-	0	Hyperionvirus sp.	Mimiviridae
							TRSP31403.t1	124.724	hypothetical protein Hyperionvirus5_120	-	0	Hyperionvirus sp.	Mimiviridae
							TRSP31503.t1	117.286	hypothetical protein Hyperionvirus5_103	-	0	Hyperionvirus sp.	Mimiviridae
							TRSP31592.t1	80.1332	hypothetical protein Catovirus_1_618	-	0	Catovirus CTV1	Mimiviridae
							TRSP31610.t1	133.594	hypothetical protein Harvfovirus8_11	-	0	Harvfovirus sp.	Mimiviridae
							TRSP31616.t1	45.0484	hypothetical protein Hyperionvirus5_103	-	0	Hyperionvirus sp.	Mimiviridae
							TRSP31741.t1	105.518	hypothetical protein Hyperionvirus6_11	-	0	Hyperionvirus sp.	Mimiviridae
							TRSP31856.t1	144.537	hypothetical protein Harvfovirus20_10	-	0	Harvfovirus sp.	Mimiviridae
							TRSP31893.t1	60.7873	hypothetical protein Harvfovirus3_55	-	0	Harvfovirus sp.	Mimiviridae
							TRSP31978.t1	92.4255	F-box domain protein	-	0	Indivirus ILV1	Mimiviridae
							TRSP32212.t1	79.0618	F-box domain protein	-	0	Indivirus ILV1	Mimiviridae
							TRSP32213.t1	127.564	hypothetical protein	-	0	Tupanvirus soda lake	Mimiviridae
							TRSP32219.t1	91.8733	hypothetical protein	-	0	Tupanvirus soda lake	Mimiviridae
							TRSP32220.t1	82.6193	hypothetical protein Hyperionvirus5_120	-	0	Hyperionvirus sp.	Mimiviridae
							TRSP32221.t1	127.94	hypothetical protein Harvfovirus20_10	-	0	Harvfovirus sp.	Mimiviridae
							TRSP32250.t1	99.9629	hypothetical protein Harvfovirus8_11	-	0	Harvfovirus sp.	Mimiviridae
							TRSP32254.t1	103.91	hypothetical protein Harvfovirus8_11	-	0	Harvfovirus sp.	Mimiviridae
							TRSP32278.t1	100.363	hypothetical protein	-	0	Tupanvirus soda lake	Mimiviridae
							TRSP32324.t1	49.6263	hypothetical protein Hyperionvirus1_152	-	0	Hyperionvirus sp.	Mimiviridae
							TRSP32329.t1	110.359	hypothetical protein Harvfovirus8_11	-	0	Harvfovirus sp.	Mimiviridae
							TRSP32452.t1	50.1625	hypothetical protein Catovirus_1_618	-	0	Catovirus CTV1	Mimiviridae
							TRSP32538.t1	111.766	hypothetical protein Harvfovirus20_10	-	0	Harvfovirus sp.	Mimiviridae
							TRSP32554.t1	66.8754	hypothetical protein Hyperionvirus6_11	-	0	Hyperionvirus sp.	Mimiviridae
							TRSP32598.t1	147.406	hypothetical protein Harvfovirus20_10	-	0	Harvfovirus sp.	Mimiviridae
							TRSP32691.t1	72.7426	hypothetical protein Hyperionvirus6_11	-	0	Hyperionvirus sp.	Mimiviridae
							TRSP32692.t1	143.589	hypothetical protein	-	0	Tupanvirus soda lake	Mimiviridae
							TRSP32707.t1	78.8907	hypothetical protein	-	0	Tupanvirus soda lake	Mimiviridae
							TRSP32805.t1	61.8968	hypothetical protein	-	0	Tupanvirus soda lake	Mimiviridae
							TRSP32844.t1	106.434	hypothetical protein	-	0	Tupanvirus soda lake	Mimiviridae
							TRSP32876.t1	57.7729	F-box domain protein	-	0	Indivirus ILV1	Mimiviridae
							TRSP32880.t1	57.0884	hypothetical protein Hyperionvirus5_103	-	0	Hyperionvirus sp.	Mimiviridae
							TRSP32881.t1	79.5946	hypothetical protein Harvfovirus8_11	-	0	Harvfovirus sp.	Mimiviridae
							TRSP33261.t1	47.5223	hypothetical protein Catovirus_1_560	-	0	Catovirus CTV1	Mimiviridae
							TRSP3330.t1	105.655	hypothetical protein Harvfovirus20_10	-	0	Harvfovirus sp.	Mimiviridae
							TRSP3332.t1	107.715	hypothetical protein Harvfovirus20_10	-	0	Harvfovirus sp.	Mimiviridae
							TRSP33504.t1	177.85	hypothetical protein Harvfovirus20_10	-	0	Harvfovirus sp.	Mimiviridae
							TRSP33579.t1	132.137	hypothetical protein	-	0	Tupanvirus soda lake	Mimiviridae
							TRSP33641.t1	141.97	hypothetical protein Harvfovirus8_11	-	0	Harvfovirus sp.	Mimiviridae
							TRSP3370.t1	47.412	hypothetical protein Hyperionvirus2_165	-	0	Hyperionvirus sp.	Mimiviridae
							TRSP33701.t1	87.7651	hypothetical protein Harvfovirus30_3	-	0	Harvfovirus sp.	Mimiviridae
							TRSP33824.t1	78.012	hypothetical protein Harvfovirus36_1, partial	-	0	Harvfovirus sp.	Mimiviridae
							TRSP3394.t1	133.234	hypothetical protein Harvfovirus3_55	-	0	Harvfovirus sp.	Mimiviridae
							TRSP3396.t1	123.318	hypothetical protein Hyperionvirus6_11	-	0	Hyperionvirus sp.	Mimiviridae
							TRSP34046.t1	52.1778	hypothetical protein Catovirus_1_561	-	0	Catovirus CTV1	Mimiviridae
							TRSP34111.t1	96.3128	hypothetical protein Hyperionvirus5_103	-	0	Hyperionvirus sp.	Mimiviridae
							TRSP34127.t1	55.8712	hypothetical protein Harvfovirus8_11	-	0	Harvfovirus sp.	Mimiviridae
							TRSP34189.t1	126.655	hypothetical protein Hyperionvirus5_120	-	0	Hyperionvirus sp.	Mimiviridae
							TRSP34247.t1	180.281	hypothetical protein Harvfovirus3_55	-	0	Harvfovirus sp.	Mimiviridae
							TRSP34256.t1	124.219	hypothetical protein	-	0	Tupanvirus soda lake	Mimiviridae
							TRSP34265.t1	79.3293	hypothetical protein Harvfovirus8_11	-	0	Harvfovirus sp.	Mimiviridae
							TRSP34285.t1	100.746	leucine-rich repeat protein	-	0	Pithovirus LCPAC101	Pithoviridae
							TRSP34310.t1	55.6123	hypothetical protein Harvfovirus30_3	-	0	Harvfovirus sp.	Mimiviridae
							TRSP34720.t1	117.73	hypothetical protein Hyperionvirus6_11	-	0	Hyperionvirus sp.	Mimiviridae
							TRSP35014.t1	166.04	hypothetical protein	-	0	Tupanvirus soda lake	Mimiviridae
							TRSP35084.t1	90.3053	hypothetical protein Harvfovirus34_12	-	0	Harvfovirus sp.	Mimiviridae
							TRSP35123.t1	76.5641	hypothetical protein Harvfovirus8_11	-	0	Harvfovirus sp.	Mimiviridae
							TRSP35127.t1	74.1246	hypothetical protein	-	0	Tupanvirus soda lake	Mimiviridae
							TRSP35165.t1	77.3559	hypothetical protein Harvfovirus8_11	-	0	Harvfovirus sp.	Mimiviridae
							TRSP3530.t1	112.308	hypothetical protein Harvfovirus20_10	-	0	Harvfovirus sp.	Mimiviridae
							TRSP35435.t1	152.168	hypothetical protein Harvfovirus8_11	-	0	Harvfovirus sp.	Mimiviridae
							TRSP35590.t1	160.801	hypothetical protein Hyperionvirus5_120	-	0	Hyperionvirus sp.	Mimiviridae
							TRSP35603.t1	69.7857	hypothetical protein Catovirus_1_459	-	0	Catovirus CTV1	Mimiviridae
							TRSP35618.t1	71.0944	hypothetical protein Harvfovirus20_10	-	0	Harvfovirus sp.	Mimiviridae
							TRSP35677.t1	158.997	hypothetical protein Hyperionvirus5_120	-	0	Hyperionvirus sp.	Mimiviridae
							TRSP35678.t1	74.8715	hypothetical protein Harvfovirus36_1, partial	-	0	Harvfovirus sp.	Mimiviridae
							TRSP35903.t1	93.7857	hypothetical protein Hyperionvirus6_11	-	0	Hyperionvirus sp.	Mimiviridae
							TRSP36001.t1	92.3733	hypothetical protein Catovirus_1_618	-	0	Catovirus CTV1	Mimiviridae
							TRSP36003.t1	56.5322	F-box domain protein	-	0	Indivirus ILV1	Mimiviridae
							TRSP36078.t1	47.0972	hypothetical protein Harvfovirus20_10	-	0	Harvfovirus sp.	Mimiviridae
							TRSP3650.t1	60.0224	hypothetical protein Harvfovirus20_10	-	0	Harvfovirus sp.	Mimiviridae
							TRSP36644.t1	67.9093	hypothetical protein Hyperionvirus5_103	-	0	Hyperionvirus sp.	Mimiviridae
							TRSP36645.t1	117.15	hypothetical protein Harvfovirus8_11	-	0	Harvfovirus sp.	Mimiviridae
							TRSP36650.t1	66.2987	hypothetical protein Harvfovirus8_11	-	0	Harvfovirus sp.	Mimiviridae
							TRSP36689.t1	121.87	hypothetical protein Hyperionvirus6_11	-	0	Hyperionvirus sp.	Mimiviridae
							TRSP36752.t1	111.379	hypothetical protein Hyperionvirus5_103	-	0	Hyperionvirus sp.	Mimiviridae
							TRSP36772.t1	84.5313	hypothetical protein	-	0	Tupanvirus soda lake	Mimiviridae
							TRSP3710.t1	120.742	hypothetical protein	-	0	Tupanvirus soda lake	Mimiviridae
							TRSP37641.t1	85.5469	F-box domain protein	-	0	Indivirus ILV1	Mimiviridae
							TRSP3800.t1	52.1778	hypothetical protein Catovirus_1_561	-	0	Catovirus CTV1	Mimiviridae
							TRSP38198.t1	131.056	hypothetical protein Harvfovirus20_10	-	0	Harvfovirus sp.	Mimiviridae
							TRSP38285.t1	57.4247	hypothetical protein	-	0	Tupanvirus soda lake	Mimiviridae
							TRSP3877.t1	78.8411	F-box domain protein	-	0	Indivirus ILV1	Mimiviridae
							TRSP3894.t1	58.0607	hypothetical protein Harvfovirus30_3	-	0	Harvfovirus sp.	Mimiviridae
							TRSP39167.t1	46.973	hypothetical protein Catovirus_1_459	-	0	Catovirus CTV1	Mimiviridae
							TRSP39169.t1	130.202	hypothetical protein	-	0	Tupanvirus soda lake	Mimiviridae
							TRSP3918.t1	180.592	hypothetical protein Harvfovirus3_55	-	0	Harvfovirus sp.	Mimiviridae
							TRSP39252.t1	49.8265	hypothetical protein Hyperionvirus1_57	-	0	Hyperionvirus sp.	Mimiviridae
							TRSP39254.t1	100.536	hypothetical protein	-	0	Tupanvirus soda lake	Mimiviridae
							TRSP39257.t1	115.052	hypothetical protein Hyperionvirus5_103	-	0	Hyperionvirus sp.	Mimiviridae
							TRSP39262.t1	226.938	hypothetical protein Harvfovirus20_10	-	0	Harvfovirus sp.	Mimiviridae
							TRSP39355.t1	74.1422	hypothetical protein Harvfovirus8_11	-	0	Harvfovirus sp.	Mimiviridae
							TRSP39441.t1	97.6554	hypothetical protein Harvfovirus8_11	-	0	Harvfovirus sp.	Mimiviridae
							TRSP39586.t1	143.877	hypothetical protein Harvfovirus8_11	-	0	Harvfovirus sp.	Mimiviridae
							TRSP3959.t1	132.681	hypothetical protein Harvfovirus20_10	-	0	Harvfovirus sp.	Mimiviridae
							TRSP39754.t1	93.5392	hypothetical protein Harvfovirus8_11	-	0	Harvfovirus sp.	Mimiviridae
							TRSP39767.t1	48.4602	hypothetical protein Hyperionvirus2_165	-	0	Hyperionvirus sp.	Mimiviridae
							TRSP39923.t1	85.5303	hypothetical protein Hyperionvirus6_11	-	0	Hyperionvirus sp.	Mimiviridae
							TRSP39929.t1	60.0973	hypothetical protein Harvfovirus8_11	-	0	Harvfovirus sp.	Mimiviridae
							TRSP40022.t1	113.986	hypothetical protein Hyperionvirus5_103	-	0	Hyperionvirus sp.	Mimiviridae
							TRSP4011.t1	109.873	hypothetical protein Harvfovirus36_1, partial	-	0	Harvfovirus sp.	Mimiviridae
							TRSP40189.t1	113.374	hypothetical protein Harvfovirus8_11	-	0	Harvfovirus sp.	Mimiviridae
							TRSP40191.t1	110.07	hypothetical protein Harvfovirus20_10	-	0	Harvfovirus sp.	Mimiviridae
							TRSP40261.t1	75.9121	hypothetical protein Harvfovirus8_11	-	0	Harvfovirus sp.	Mimiviridae
							TRSP40412.t1	62.8642	hypothetical protein Hyperionvirus1_174	-	0	Hyperionvirus sp.	Mimiviridae
							TRSP4083.t1	46.521	hypothetical protein Harvfovirus30_3	-	0	Harvfovirus sp.	Mimiviridae
							TRSP41422.t1	124.973	hypothetical protein Harvfovirus20_10	-	0	Harvfovirus sp.	Mimiviridae
							TRSP41435.t1	133.01	hypothetical protein Harvfovirus8_11	-	0	Harvfovirus sp.	Mimiviridae
							TRSP41463.t1	91.708	hypothetical protein Harvfovirus20_10	-	0	Harvfovirus sp.	Mimiviridae
							TRSP4151.t1	128.694	hypothetical protein Harvfovirus8_11	-	0	Harvfovirus sp.	Mimiviridae
							TRSP41617.t1	118.297	hypothetical protein Harvfovirus20_10	-	0	Harvfovirus sp.	Mimiviridae
							TRSP41618.t1	74.1584	leucine-rich repeat protein	-	0	Pithovirus LCPAC101	Pithoviridae
							TRSP4170.t1	114.288	hypothetical protein Harvfovirus20_10	-	0	Harvfovirus sp.	Mimiviridae
							TRSP41905.t1	53.463	putative ankyrin repeat protein	-	0	Acanthamoeba polyphaga mimivirus	Mimiviridae
							TRSP41954.t1	70.4551	hypothetical protein Harvfovirus8_11	-	0	Harvfovirus sp.	Mimiviridae
							TRSP41962.t1	100.624	hypothetical protein Harvfovirus3_55	-	0	Harvfovirus sp.	Mimiviridae
							TRSP42029.t1	87.557	hypothetical protein	-	0	Tupanvirus soda lake	Mimiviridae
							TRSP42057.t1	130.465	hypothetical protein	-	0	Tupanvirus soda lake	Mimiviridae
							TRSP42064.t1	126.826	hypothetical protein Harvfovirus20_10	-	0	Harvfovirus sp.	Mimiviridae
							TRSP4212.t1	124.986	hypothetical protein Hyperionvirus5_120	-	0	Hyperionvirus sp.	Mimiviridae
							TRSP4245.t1	192.244	hypothetical protein Harvfovirus20_10	-	0	Harvfovirus sp.	Mimiviridae
							TRSP42496.t1	51.5577	hypothetical protein Harvfovirus8_11	-	0	Harvfovirus sp.	Mimiviridae
							TRSP42500.t1	72.2382	hypothetical protein Harvfovirus36_1, partial	-	0	Harvfovirus sp.	Mimiviridae
							TRSP42655.t1	90.4867	hypothetical protein Harvfovirus20_10	-	0	Harvfovirus sp.	Mimiviridae
							TRSP42741.t1	127.358	hypothetical protein Harvfovirus20_10	-	0	Harvfovirus sp.	Mimiviridae
							TRSP42776.t1	166.558	hypothetical protein	-	0	Tupanvirus soda lake	Mimiviridae
							TRSP42923.t1	75.0902	hypothetical protein	-	0	Tupanvirus soda lake	Mimiviridae
							TRSP4296.t1	89.3741	F-box domain protein	-	0	Indivirus ILV1	Mimiviridae
							TRSP42986.t1	65.1878	F-box domain protein	-	0	Indivirus ILV1	Mimiviridae
							TRSP4310.t1	86.695	hypothetical protein Harvfovirus8_11	-	0	Harvfovirus sp.	Mimiviridae
							TRSP4316.t1	51.7995	hypothetical protein Catovirus_1_618	-	0	Catovirus CTV1	Mimiviridae
							TRSP4322.t1	114.171	hypothetical protein Harvfovirus8_11	-	0	Harvfovirus sp.	Mimiviridae
							TRSP43408.t1	150.081	hypothetical protein	-	0	Tupanvirus soda lake	Mimiviridae
							TRSP43414.t1	90.289	hypothetical protein	-	0	Tupanvirus soda lake	Mimiviridae
							TRSP43764.t1	170.667	hypothetical protein Harvfovirus20_10	-	0	Harvfovirus sp.	Mimiviridae
							TRSP43786.t1	110.75	hypothetical protein Harvfovirus36_1, partial	-	0	Harvfovirus sp.	Mimiviridae
							TRSP43794.t1	256.567	hypothetical protein Harvfovirus3_55	-	0	Harvfovirus sp.	Mimiviridae
							TRSP43817.t1	156.635	hypothetical protein	-	0	Tupanvirus soda lake	Mimiviridae
							TRSP4390.t1	53.1795	hypothetical protein Harvfovirus30_3	-	0	Harvfovirus sp.	Mimiviridae
							TRSP43979.t1	78.2816	hypothetical protein Harvfovirus8_11	-	0	Harvfovirus sp.	Mimiviridae
							TRSP44028.t1	77.0383	hypothetical protein Harvfovirus8_11	-	0	Harvfovirus sp.	Mimiviridae
							TRSP44032.t1	54.4217	hypothetical protein Hyperionvirus1_152	-	0	Hyperionvirus sp.	Mimiviridae
							TRSP44092.t1	60.2104	hypothetical protein	-	0	Tupanvirus soda lake	Mimiviridae
							TRSP44138.t1	59.036	hypothetical protein Hyperionvirus1_152	-	0	Hyperionvirus sp.	Mimiviridae
							TRSP44145.t1	57.1115	F-box domain protein	-	0	Indivirus ILV1	Mimiviridae
							TRSP44154.t1	55.4512	hypothetical protein Hyperionvirus1_174	-	0	Hyperionvirus sp.	Mimiviridae
							TRSP44199.t1	76.488	hypothetical protein Harvfovirus8_11	-	0	Harvfovirus sp.	Mimiviridae
							TRSP44281.t1	81.3102	hypothetical protein Hyperionvirus5_103	-	0	Hyperionvirus sp.	Mimiviridae
							TRSP44441.t1	119.044	hypothetical protein	-	0	Tupanvirus soda lake	Mimiviridae
							TRSP44475.t1	119.208	hypothetical protein Harvfovirus20_10	-	0	Harvfovirus sp.	Mimiviridae
							TRSP44524.t1	80.2422	hypothetical protein Harvfovirus20_10	-	0	Harvfovirus sp.	Mimiviridae
							TRSP44543.t1	124.082	hypothetical protein	-	0	Tupanvirus soda lake	Mimiviridae
							TRSP44630.t1	152.697	hypothetical protein Harvfovirus3_55	-	0	Harvfovirus sp.	Mimiviridae
							TRSP44632.t1	90.9306	hypothetical protein Harvfovirus20_10	-	0	Harvfovirus sp.	Mimiviridae
							TRSP44767.t1	105.338	hypothetical protein Harvfovirus34_12	-	0	Harvfovirus sp.	Mimiviridae
							TRSP45109.t1	170.247	hypothetical protein Harvfovirus20_10	-	0	Harvfovirus sp.	Mimiviridae
							TRSP45115.t1	72.4633	F-box domain protein	-	0	Marseillevirus LCMAC101	unclassified Marseilleviridae
							TRSP45141.t1	114.531	hypothetical protein Hyperionvirus6_11	-	0	Hyperionvirus sp.	Mimiviridae
							TRSP45275.t1	101.92	F-box domain protein	-	0	Indivirus ILV1	Mimiviridae
							TRSP4638.t1	60.7289	hypothetical protein Hyperionvirus3_153	-	0	Hyperionvirus sp.	Mimiviridae
							TRSP472.t1	115.702	hypothetical protein Harvfovirus8_11	-	0	Harvfovirus sp.	Mimiviridae
							TRSP4763.t1	45.277	hypothetical protein Harvfovirus36_1, partial	-	0	Harvfovirus sp.	Mimiviridae
							TRSP4766.t1	70.6506	hypothetical protein	-	0	Tupanvirus soda lake	Mimiviridae
							TRSP4823.t1	83.2524	F-box domain protein	-	0	Indivirus ILV1	Mimiviridae
							TRSP4829.t1	57.9301	leucine-rich repeat protein	-	0	Pithovirus LCPAC101	Pithoviridae
							TRSP4830.t1	50.1634	F-box domain protein	-	0	Indivirus ILV1	Mimiviridae
							TRSP4855.t1	133.141	hypothetical protein Harvfovirus20_10	-	0	Harvfovirus sp.	Mimiviridae
							TRSP4981.t1	108.766	hypothetical protein Hyperionvirus6_11	-	0	Hyperionvirus sp.	Mimiviridae
							TRSP5062.t1	124.463	hypothetical protein	-	0	Tupanvirus soda lake	Mimiviridae
							TRSP5121.t1	118.253	hypothetical protein Harvfovirus20_10	-	0	Harvfovirus sp.	Mimiviridae
							TRSP5123.t1	58.1462	hypothetical protein Harvfovirus20_10	-	0	Harvfovirus sp.	Mimiviridae
							TRSP5246.t1	101.877	hypothetical protein	-	0	Tupanvirus soda lake	Mimiviridae
							TRSP5334.t1	152.58	hypothetical protein Harvfovirus8_11	-	0	Harvfovirus sp.	Mimiviridae
							TRSP5467.t1	156.66	hypothetical protein Harvfovirus20_10	-	0	Harvfovirus sp.	Mimiviridae
							TRSP5604.t1	87.1822	hypothetical protein Harvfovirus36_1, partial	-	0	Harvfovirus sp.	Mimiviridae
							TRSP5613.t1	169.414	hypothetical protein Harvfovirus20_10	-	0	Harvfovirus sp.	Mimiviridae
							TRSP5625.t1	143.877	hypothetical protein Harvfovirus8_11	-	0	Harvfovirus sp.	Mimiviridae
							TRSP5871.t1	96.8568	hypothetical protein Catovirus_1_561	-	0	Catovirus CTV1	Mimiviridae
							TRSP5931.t1	45.0495	hypothetical protein Harvfovirus20_10	-	0	Harvfovirus sp.	Mimiviridae
							TRSP6025.t1	95.191	hypothetical protein	-	0	Tupanvirus soda lake	Mimiviridae
							TRSP6047.t1	112.131	hypothetical protein Hyperionvirus5_103	-	0	Hyperionvirus sp.	Mimiviridae
							TRSP6077.t1	57.4499	leucine-rich repeat protein	-	0	Pithovirus LCPAC101	Pithoviridae
							TRSP6082.t1	106.71	hypothetical protein Hyperionvirus5_103	-	0	Hyperionvirus sp.	Mimiviridae
							TRSP6091.t1	130.42	F-box domain protein	-	0	Marseillevirus LCMAC101	unclassified Marseilleviridae
							TRSP6106.t1	89.8422	hypothetical protein Hyperionvirus2_165	-	0	Hyperionvirus sp.	Mimiviridae
							TRSP6115.t1	98.834	hypothetical protein Harvfovirus8_11	-	0	Harvfovirus sp.	Mimiviridae
							TRSP6122.t1	69.2003	hypothetical protein Harvfovirus34_12	-	0	Harvfovirus sp.	Mimiviridae
							TRSP6178.t1	106.017	hypothetical protein	-	0	Tupanvirus soda lake	Mimiviridae
							TRSP6246.t1	113.706	hypothetical protein Harvfovirus8_11	-	0	Harvfovirus sp.	Mimiviridae
							TRSP6432.t1	143.839	hypothetical protein	-	0	Tupanvirus soda lake	Mimiviridae
							TRSP6433.t1	72.7426	hypothetical protein Hyperionvirus6_11	-	0	Hyperionvirus sp.	Mimiviridae
							TRSP6591.t1	91.918	hypothetical protein Harvfovirus20_10	-	0	Harvfovirus sp.	Mimiviridae
							TRSP6680.t1	126.002	hypothetical protein Harvfovirus20_10	-	0	Harvfovirus sp.	Mimiviridae
							TRSP6681.t1	78.5008	leucine-rich repeat protein	-	0	Pithovirus LCPAC101	Pithoviridae
							TRSP6746.t1	138.874	hypothetical protein Harvfovirus20_10	-	0	Harvfovirus sp.	Mimiviridae
							TRSP6809.t1	123.924	hypothetical protein Harvfovirus34_12	-	0	Harvfovirus sp.	Mimiviridae
							TRSP6888.t1	45.105	hypothetical protein Hyperionvirus1_174	-	0	Hyperionvirus sp.	Mimiviridae
							TRSP6908.t1	100.127	hypothetical protein Hyperionvirus6_11	-	0	Hyperionvirus sp.	Mimiviridae
							TRSP6982.t1	75.5774	hypothetical protein Harvfovirus8_11	-	0	Harvfovirus sp.	Mimiviridae
							TRSP6984.t1	75.4205	F-box domain protein	-	0	Indivirus ILV1	Mimiviridae
							TRSP6999.t1	158.706	hypothetical protein	-	0	Tupanvirus soda lake	Mimiviridae
							TRSP7003.t1	65.8731	hypothetical protein Harvfovirus30_3	-	0	Harvfovirus sp.	Mimiviridae
							TRSP7084.t1	92.9588	hypothetical protein Harvfovirus20_10	-	0	Harvfovirus sp.	Mimiviridae
							TRSP7323.t1	111.661	hypothetical protein Harvfovirus8_11	-	0	Harvfovirus sp.	Mimiviridae
							TRSP7353.t1	146.282	hypothetical protein	-	0	Tupanvirus soda lake	Mimiviridae
							TRSP7451.t1	146.179	hypothetical protein	-	0	Tupanvirus soda lake	Mimiviridae
							TRSP7456.t1	110.39	hypothetical protein	-	0	Tupanvirus soda lake	Mimiviridae
							TRSP7489.t1	159.75	hypothetical protein Harvfovirus20_10	-	0	Harvfovirus sp.	Mimiviridae
							TRSP7495.t1	121.08	hypothetical protein Harvfovirus3_55	-	0	Harvfovirus sp.	Mimiviridae
							TRSP7507.t1	78.1622	F-box domain protein	-	0	Marseillevirus LCMAC101	unclassified Marseilleviridae
							TRSP7511.t1	82.2115	hypothetical protein Hyperionvirus5_103	-	0	Hyperionvirus sp.	Mimiviridae
							TRSP7537.t1	76.2385	F-box domain protein	-	0	Indivirus ILV1	Mimiviridae
							TRSP7796.t1	65.4996	hypothetical protein Hyperionvirus3_153	-	0	Hyperionvirus sp.	Mimiviridae
							TRSP7810.t1	118.39	hypothetical protein Harvfovirus36_1, partial	-	0	Harvfovirus sp.	Mimiviridae
							TRSP7863.t1	128.178	hypothetical protein Harvfovirus36_1, partial	-	0	Harvfovirus sp.	Mimiviridae
							TRSP7882.t1	145.922	hypothetical protein	-	0	Tupanvirus soda lake	Mimiviridae
							TRSP7904.t1	97.8499	hypothetical protein	-	0	Tupanvirus soda lake	Mimiviridae
							TRSP7921.t1	86.8834	hypothetical protein Hyperionvirus6_11	-	0	Hyperionvirus sp.	Mimiviridae
							TRSP7922.t1	119.567	hypothetical protein Harvfovirus20_10	-	0	Harvfovirus sp.	Mimiviridae
							TRSP8061.t1	51.0101	hypothetical protein Hyperionvirus1_126	-	0	Hyperionvirus sp.	Mimiviridae
							TRSP8180.t1	167.282	hypothetical protein	-	0	Tupanvirus soda lake	Mimiviridae
							TRSP8233.t1	88.1743	hypothetical protein	-	0	Tupanvirus soda lake	Mimiviridae
							TRSP8242.t1	88.1743	hypothetical protein	-	0	Tupanvirus soda lake	Mimiviridae
							TRSP8278.t1	118.253	hypothetical protein Harvfovirus20_10	-	0	Harvfovirus sp.	Mimiviridae
							TRSP8282.t1	54.7796	hypothetical protein Harvfovirus20_10	-	0	Harvfovirus sp.	Mimiviridae
							TRSP8511.t1	61.6991	hypothetical protein Hyperionvirus5_120	-	0	Hyperionvirus sp.	Mimiviridae
							TRSP8520.t1	193.491	hypothetical protein Harvfovirus20_10	-	0	Harvfovirus sp.	Mimiviridae
							TRSP8657.t1	120.46	hypothetical protein Harvfovirus20_10	-	0	Harvfovirus sp.	Mimiviridae
							TRSP8673.t1	50.6701	hypothetical protein Harvfovirus8_11	-	0	Harvfovirus sp.	Mimiviridae
							TRSP8678.t1	158.932	hypothetical protein Harvfovirus20_10	-	0	Harvfovirus sp.	Mimiviridae
							TRSP8702.t1	130.935	hypothetical protein Hyperionvirus6_11	-	0	Hyperionvirus sp.	Mimiviridae
							TRSP8746.t1	60.7768	hypothetical protein Harvfovirus36_1, partial	-	0	Harvfovirus sp.	Mimiviridae
							TRSP8801.t1	154.788	hypothetical protein Harvfovirus3_55	-	0	Harvfovirus sp.	Mimiviridae
							TRSP8838.t1	86.064	hypothetical protein Harvfovirus8_11	-	0	Harvfovirus sp.	Mimiviridae
							TRSP8940.t1	99.8876	hypothetical protein Harvfovirus3_55	-	0	Harvfovirus sp.	Mimiviridae
							TRSP8948.t1	111.516	hypothetical protein Harvfovirus8_11	-	0	Harvfovirus sp.	Mimiviridae
							TRSP8980.t1	102.725	F-box domain protein	-	0	Indivirus ILV1	Mimiviridae
							TRSP8996.t1	96.9485	hypothetical protein Harvfovirus3_55	-	0	Harvfovirus sp.	Mimiviridae
							TRSP9043.t1	90.1587	hypothetical protein	-	0	Tupanvirus soda lake	Mimiviridae
							TRSP9058.t1	53.0907	hypothetical protein Harvfovirus30_3	-	0	Harvfovirus sp.	Mimiviridae
							TRSP9152.t1	63.6053	hypothetical protein Harvfovirus30_3	-	0	Harvfovirus sp.	Mimiviridae
							TRSP9154.t1	85.0956	F-box domain protein	-	0	Indivirus ILV1	Mimiviridae
							TRSP9177.t1	101.201	hypothetical protein Harvfovirus8_11	-	0	Harvfovirus sp.	Mimiviridae
							TRSP923.t1	81.495	hypothetical protein Harvfovirus36_1, partial	-	0	Harvfovirus sp.	Mimiviridae
							TRSP9340.t1	109.091	hypothetical protein Harvfovirus36_1, partial	-	0	Harvfovirus sp.	Mimiviridae
							TRSP9376.t1	97.7187	hypothetical protein	-	0	Tupanvirus soda lake	Mimiviridae
							TRSP9476.t1	110.615	hypothetical protein Harvfovirus8_11	-	0	Harvfovirus sp.	Mimiviridae
							TRSP9706.t1	112.773	hypothetical protein Harvfovirus20_10	-	0	Harvfovirus sp.	Mimiviridae
							TRSP972.t1	137.243	hypothetical protein Harvfovirus20_10	-	0	Harvfovirus sp.	Mimiviridae
							TRSP9869.t1	114.368	hypothetical protein	-	0	Tupanvirus soda lake	Mimiviridae
							TRSP992.t1	55.262	hypothetical protein Hyperionvirus3_153	-	0	Hyperionvirus sp.	Mimiviridae

## Sheet: Sheet5
transcript_id	primary_tag
TRSP29982.t1	intron
TRSP29982.t1	intron
TRSP29983.t1	intron
TRSP29983.t1	intron
TRSP29983.t1	intron
TRSP17872.t1	intron
TRSP5653.t1	intron
TRSP44256.t1	intron
TRSP44256.t1	intron
TRSP44256.t1	intron
TRSP44256.t1	intron
TRSP44256.t1	intron
TRSP44256.t1	intron
TRSP44256.t1	intron
TRSP44256.t1	intron
TRSP246.t1	intron
TRSP246.t1	intron
TRSP32663.t1	intron
TRSP32663.t1	intron
TRSP20619.t1	intron
TRSP20619.t1	intron
TRSP20619.t1	intron
TRSP20619.t1	intron
TRSP20619.t1	intron
TRSP20620.t1	intron
TRSP20620.t1	intron
TRSP28120.t1	intron
TRSP28120.t1	intron
TRSP28120.t1	intron
TRSP28120.t1	intron
TRSP32202.t1	intron
TRSP32202.t1	intron
TRSP32202.t1	intron
TRSP32203.t1	intron
TRSP2669.t1	intron
TRSP2669.t1	intron
TRSP2669.t1	intron
TRSP2669.t1	intron
TRSP2669.t1	intron
TRSP2669.t1	intron
TRSP2670.t1	intron
TRSP2670.t1	intron
TRSP2670.t1	intron
TRSP2670.t1	intron
TRSP2670.t1	intron
TRSP2670.t1	intron
TRSP2670.t1	intron
TRSP10493.t1	intron
TRSP10493.t1	intron
TRSP10494.t1	intron
TRSP10494.t1	intron
TRSP10495.t1	intron
TRSP10495.t1	intron
TRSP10495.t1	intron
TRSP10495.t1	intron
TRSP10495.t1	intron
TRSP10495.t1	intron
TRSP10495.t1	intron
TRSP103.t1	intron
TRSP103.t1	intron
TRSP103.t1	intron
TRSP103.t1	intron
TRSP103.t1	intron
TRSP103.t1	intron
TRSP23913.t1	intron
TRSP23913.t1	intron
TRSP23913.t1	intron
TRSP23913.t1	intron
TRSP23913.t1	intron
TRSP23913.t1	intron
TRSP23913.t1	intron
TRSP23913.t1	intron
TRSP43557.t1	intron
TRSP43557.t1	intron
TRSP43558.t1	intron
TRSP43558.t1	intron
TRSP43559.t1	intron
TRSP43559.t1	intron
TRSP43559.t1	intron
TRSP43559.t1	intron
TRSP43559.t1	intron
TRSP28094.t1	intron
TRSP28094.t1	intron
TRSP28094.t1	intron
TRSP28094.t1	intron
TRSP28094.t1	intron
TRSP28095.t1	intron
TRSP28095.t1	intron
TRSP28095.t1	intron
TRSP28095.t1	intron
TRSP28095.t1	intron
TRSP28095.t1	intron
TRSP28095.t1	intron
TRSP28095.t1	intron
TRSP28095.t1	intron
TRSP28095.t1	intron
TRSP28095.t1	intron
TRSP201.t1	intron
TRSP201.t1	intron
TRSP201.t1	intron
TRSP201.t1	intron
TRSP201.t1	intron
TRSP201.t1	intron
TRSP201.t1	intron
TRSP201.t1	intron
TRSP790.t1	intron
TRSP790.t1	intron
TRSP791.t1	intron
TRSP791.t1	intron
TRSP791.t1	intron
TRSP793.t1	intron
TRSP793.t1	intron
TRSP793.t1	intron
TRSP793.t1	intron
TRSP793.t1	intron
TRSP793.t1	intron
TRSP793.t1	intron
TRSP794.t1	intron
TRSP794.t1	intron
TRSP794.t1	intron
TRSP794.t1	intron
TRSP794.t1	intron
TRSP794.t1	intron
TRSP794.t1	intron
TRSP794.t1	intron
TRSP794.t1	intron
TRSP795.t1	intron
TRSP795.t1	intron
TRSP44661.t1	intron
TRSP44661.t1	intron
TRSP44661.t1	intron
TRSP44661.t1	intron
TRSP44661.t1	intron
TRSP44661.t1	intron
TRSP44661.t1	intron
TRSP44661.t1	intron
TRSP44661.t1	intron
TRSP44661.t1	intron
TRSP29147.t1	intron
TRSP29147.t1	intron
TRSP29147.t1	intron
TRSP29147.t1	intron
TRSP29147.t1	intron
TRSP29147.t1	intron
TRSP29147.t1	intron
TRSP29148.t1	intron
TRSP29148.t1	intron
TRSP29148.t1	intron
TRSP29148.t1	intron
TRSP29148.t1	intron
TRSP29149.t1	intron
TRSP29149.t1	intron
TRSP29150.t1	intron
TRSP29150.t1	intron
TRSP29150.t1	intron
TRSP11416.t1	intron
TRSP11416.t1	intron
TRSP11416.t1	intron
TRSP11417.t1	intron
TRSP11417.t1	intron
TRSP11417.t1	intron
TRSP11417.t1	intron
TRSP11417.t1	intron
TRSP11417.t1	intron
TRSP11417.t1	intron
TRSP11417.t1	intron
TRSP24198.t1	intron
TRSP24198.t1	intron
TRSP24198.t1	intron
TRSP24198.t1	intron
TRSP24198.t1	intron
TRSP24198.t1	intron
TRSP24199.t1	intron
TRSP24199.t1	intron
TRSP24199.t1	intron
TRSP24199.t1	intron
TRSP24199.t1	intron
TRSP24199.t1	intron
TRSP24199.t1	intron
TRSP24199.t1	intron
TRSP24199.t1	intron
TRSP24199.t1	intron
TRSP24199.t1	intron
TRSP24199.t1	intron
TRSP24199.t1	intron
TRSP24199.t1	intron
TRSP24199.t1	intron
TRSP24199.t1	intron
TRSP24199.t1	intron
TRSP24200.t1	intron
TRSP24200.t1	intron
TRSP230.t1	intron
TRSP5118.t1	intron
TRSP5118.t1	intron
TRSP5118.t1	intron
TRSP5118.t1	intron
TRSP5118.t1	intron
TRSP5118.t1	intron
TRSP5118.t1	intron
TRSP5118.t1	intron
TRSP5122.t1	intron
TRSP5122.t1	intron
TRSP5122.t1	intron
TRSP31441.t1	intron
TRSP31441.t1	intron
TRSP31441.t1	intron
TRSP31441.t1	intron
TRSP31441.t1	intron
TRSP31441.t1	intron
TRSP31441.t1	intron
TRSP31441.t1	intron
TRSP31441.t1	intron
TRSP31441.t1	intron
TRSP31441.t1	intron
TRSP31441.t1	intron
TRSP31441.t1	intron
TRSP31441.t1	intron
TRSP31442.t1	intron
TRSP31443.t1	intron
TRSP31443.t1	intron
TRSP31443.t1	intron
TRSP31443.t1	intron
TRSP31443.t1	intron
TRSP31443.t1	intron
TRSP31443.t1	intron
TRSP42928.t1	intron
TRSP42928.t1	intron
TRSP42928.t1	intron
TRSP42928.t1	intron
TRSP42928.t1	intron
TRSP42928.t1	intron
TRSP42928.t1	intron
TRSP42928.t1	intron
TRSP42928.t1	intron
TRSP42928.t1	intron
TRSP42928.t1	intron
TRSP42928.t1	intron
TRSP42928.t1	intron
TRSP42929.t1	intron
TRSP42929.t1	intron
TRSP42929.t1	intron
TRSP42929.t1	intron
TRSP42929.t1	intron
TRSP38240.t1	intron
TRSP38240.t1	intron
TRSP38241.t1	intron
TRSP38241.t1	intron
TRSP38241.t1	intron
TRSP38241.t1	intron
TRSP38241.t1	intron
TRSP38241.t1	intron
TRSP38241.t1	intron
TRSP38241.t1	intron
TRSP38241.t1	intron
TRSP38241.t1	intron
TRSP38241.t1	intron
TRSP15432.t1	intron
TRSP15432.t1	intron
TRSP15432.t1	intron
TRSP15432.t1	intron
TRSP15432.t1	intron
TRSP15432.t1	intron
TRSP15432.t1	intron
TRSP15432.t1	intron
TRSP15432.t1	intron
TRSP15432.t1	intron
TRSP15433.t1	intron
TRSP15433.t1	intron
TRSP15433.t1	intron
TRSP15433.t1	intron
TRSP15433.t1	intron
TRSP15433.t1	intron
TRSP15433.t1	intron
TRSP15433.t1	intron
TRSP15434.t1	intron
TRSP15434.t1	intron
TRSP15434.t1	intron
TRSP15435.t1	intron
TRSP15435.t1	intron
TRSP15435.t1	intron
TRSP15435.t1	intron
TRSP15435.t1	intron
TRSP44916.t1	intron
TRSP44916.t1	intron
TRSP44916.t1	intron
TRSP44916.t1	intron
TRSP44916.t1	intron
TRSP44918.t1	intron
TRSP44918.t1	intron
TRSP44918.t1	intron
TRSP44918.t1	intron
TRSP44919.t1	intron
TRSP43288.t1	intron
TRSP43288.t1	intron
TRSP43288.t1	intron
TRSP43288.t1	intron
TRSP43289.t1	intron
TRSP43289.t1	intron
TRSP43289.t1	intron
TRSP43289.t1	intron
TRSP43290.t1	intron
TRSP43290.t1	intron
TRSP43290.t1	intron
TRSP43290.t1	intron
TRSP43290.t1	intron
TRSP43290.t1	intron
TRSP43290.t1	intron
TRSP43290.t1	intron
TRSP43291.t1	intron
TRSP43291.t1	intron
TRSP43291.t1	intron
TRSP6874.t1	intron
TRSP6874.t1	intron
TRSP6874.t1	intron
TRSP6874.t1	intron
TRSP6876.t1	intron
TRSP6877.t1	intron
TRSP44937.t1	intron
TRSP44937.t1	intron
TRSP44938.t1	intron
TRSP44939.t1	intron
TRSP44939.t1	intron
TRSP44939.t1	intron
TRSP44940.t1	intron
TRSP44940.t1	intron
TRSP44940.t1	intron
TRSP44941.t1	intron
TRSP43108.t1	intron
TRSP43108.t1	intron
TRSP43108.t1	intron
TRSP43108.t1	intron
TRSP43108.t1	intron
TRSP43108.t1	intron
TRSP43108.t1	intron
TRSP43108.t1	intron
TRSP43108.t1	intron
TRSP43108.t1	intron
TRSP43108.t1	intron
TRSP43108.t1	intron
TRSP43108.t1	intron
TRSP43108.t1	intron
TRSP43108.t1	intron
TRSP43108.t1	intron
TRSP43109.t1	intron
TRSP43109.t1	intron
TRSP43109.t1	intron
TRSP43109.t1	intron
TRSP43110.t1	intron
TRSP43110.t1	intron
TRSP43111.t1	intron
TRSP43111.t1	intron
TRSP43111.t1	intron
TRSP43111.t1	intron
TRSP43111.t1	intron
TRSP43111.t1	intron
TRSP43111.t1	intron
TRSP43111.t1	intron
TRSP27530.t1	intron
TRSP27530.t1	intron
TRSP27530.t1	intron
TRSP27530.t1	intron
TRSP27530.t1	intron
TRSP27531.t1	intron
TRSP27531.t1	intron
TRSP27531.t1	intron
TRSP27531.t1	intron
TRSP27531.t1	intron
TRSP27531.t1	intron
TRSP27531.t1	intron
TRSP27531.t1	intron
TRSP27531.t1	intron
TRSP27531.t1	intron
TRSP27532.t1	intron
TRSP27532.t1	intron
TRSP42141.t1	intron
TRSP42141.t1	intron
TRSP42142.t1	intron
TRSP42143.t1	intron
TRSP42143.t1	intron
TRSP42143.t1	intron
TRSP42143.t1	intron
TRSP42144.t1	intron
TRSP42144.t1	intron
TRSP42144.t1	intron
TRSP42896.t1	intron
TRSP42896.t1	intron
TRSP42896.t1	intron
TRSP42896.t1	intron
TRSP42897.t1	intron
TRSP42897.t1	intron
TRSP42897.t1	intron
TRSP42897.t1	intron
TRSP42897.t1	intron
TRSP42897.t1	intron
TRSP42897.t1	intron
TRSP42897.t1	intron
TRSP42897.t1	intron
TRSP42897.t1	intron
TRSP42897.t1	intron
TRSP42898.t1	intron
TRSP42898.t1	intron
TRSP42898.t1	intron
TRSP42898.t1	intron
TRSP42898.t1	intron
TRSP42898.t1	intron
TRSP42898.t1	intron
TRSP42898.t1	intron
TRSP42898.t1	intron
TRSP42898.t1	intron
TRSP42898.t1	intron
TRSP42898.t1	intron
TRSP42898.t1	intron
TRSP42898.t1	intron
TRSP42899.t1	intron
TRSP42899.t1	intron
TRSP42899.t1	intron
TRSP42899.t1	intron
TRSP42899.t1	intron
TRSP42899.t1	intron
TRSP42899.t1	intron
TRSP42899.t1	intron
TRSP42899.t1	intron
TRSP21567.t1	intron
TRSP21567.t1	intron
TRSP21568.t1	intron
TRSP21569.t1	intron
TRSP21569.t1	intron
TRSP21569.t1	intron
TRSP21569.t1	intron
TRSP21569.t1	intron
TRSP21569.t1	intron
TRSP21569.t1	intron
TRSP21570.t1	intron
TRSP21570.t1	intron
TRSP21570.t1	intron
TRSP21570.t1	intron
TRSP21570.t1	intron
TRSP21570.t1	intron
TRSP21570.t1	intron
TRSP21570.t1	intron
TRSP21570.t1	intron
TRSP21570.t2	intron
TRSP21570.t2	intron
TRSP21571.t1	intron
TRSP21571.t1	intron
TRSP21571.t1	intron
TRSP21571.t1	intron
TRSP21571.t1	intron
TRSP21571.t1	intron
TRSP21571.t1	intron
TRSP21571.t1	intron
TRSP21572.t1	intron
TRSP21572.t1	intron
TRSP21572.t1	intron
TRSP41552.t1	intron
TRSP41552.t1	intron
TRSP41552.t1	intron
TRSP41552.t1	intron
TRSP41552.t1	intron
TRSP41552.t1	intron
TRSP41552.t1	intron
TRSP41552.t1	intron
TRSP41552.t1	intron
TRSP41552.t1	intron
TRSP41552.t1	intron
TRSP41552.t1	intron
TRSP41553.t1	intron
TRSP41553.t1	intron
TRSP41553.t1	intron
TRSP41553.t1	intron
TRSP41553.t1	intron
TRSP41553.t1	intron
TRSP41554.t1	intron
TRSP41554.t1	intron
TRSP41554.t1	intron
TRSP41554.t1	intron
TRSP41554.t1	intron
TRSP41554.t1	intron
TRSP41554.t1	intron
TRSP41554.t1	intron
TRSP41554.t1	intron
TRSP41554.t1	intron
TRSP41554.t1	intron
TRSP41554.t1	intron
TRSP41554.t1	intron
TRSP41554.t1	intron
TRSP41554.t1	intron
TRSP41554.t1	intron
TRSP41554.t1	intron
TRSP41554.t1	intron
TRSP41554.t1	intron
TRSP41554.t1	intron
TRSP41554.t1	intron
TRSP41555.t1	intron
TRSP41555.t1	intron
TRSP20377.t1	intron
TRSP20378.t1	intron
TRSP20378.t1	intron
TRSP20381.t1	intron
TRSP20381.t1	intron
TRSP20382.t1	intron
TRSP1806.t1	intron
TRSP1807.t1	intron
TRSP1807.t1	intron
TRSP1808.t1	intron
TRSP1808.t1	intron
TRSP1808.t1	intron
TRSP1808.t1	intron
TRSP1808.t1	intron
TRSP1808.t1	intron
TRSP43367.t1	intron
TRSP43367.t1	intron
TRSP43367.t1	intron
TRSP43367.t1	intron
TRSP43367.t1	intron
TRSP43367.t1	intron
TRSP43367.t1	intron
TRSP43367.t1	intron
TRSP43367.t1	intron
TRSP43367.t1	intron
TRSP43367.t1	intron
TRSP43367.t1	intron
TRSP43367.t1	intron
TRSP43367.t1	intron
TRSP43367.t1	intron
TRSP43367.t1	intron
TRSP43367.t1	intron
TRSP43367.t1	intron
TRSP43367.t1	intron
TRSP43367.t1	intron
TRSP43367.t1	intron
TRSP43367.t1	intron
TRSP43367.t1	intron
TRSP43368.t1	intron
TRSP43368.t1	intron
TRSP43368.t1	intron
TRSP43368.t1	intron
TRSP43369.t1	intron
TRSP43369.t1	intron
TRSP43369.t1	intron
TRSP43369.t1	intron
TRSP43369.t1	intron
TRSP43369.t1	intron
TRSP43369.t1	intron
TRSP43369.t1	intron
TRSP2371.t1	intron
TRSP2371.t1	intron
TRSP2372.t1	intron
TRSP2372.t1	intron
TRSP2372.t1	intron
TRSP2372.t1	intron
TRSP2372.t1	intron
TRSP2373.t1	intron
TRSP40018.t1	intron
TRSP40018.t1	intron
TRSP40018.t1	intron
TRSP40018.t1	intron
TRSP40018.t1	intron
TRSP40018.t1	intron
TRSP40019.t1	intron
TRSP40019.t1	intron
TRSP40019.t1	intron
TRSP40019.t1	intron
TRSP40019.t1	intron
TRSP40019.t1	intron
TRSP40019.t1	intron
TRSP40020.t1	intron
TRSP40020.t1	intron
TRSP40021.t1	intron
TRSP40021.t1	intron
TRSP40023.t1	intron
TRSP104.t1	intron
TRSP104.t1	intron
TRSP104.t1	intron
TRSP104.t1	intron
TRSP104.t1	intron
TRSP104.t1	intron
TRSP44726.t1	intron
TRSP44726.t1	intron
TRSP44726.t1	intron
TRSP44726.t1	intron
TRSP44727.t1	intron
TRSP44727.t1	intron
TRSP44727.t1	intron
TRSP40074.t1	intron
TRSP40075.t1	intron
TRSP40075.t1	intron
TRSP40076.t1	intron
TRSP40076.t1	intron
TRSP40076.t1	intron
TRSP40076.t1	intron
TRSP40076.t1	intron
TRSP40076.t1	intron
TRSP40076.t1	intron
TRSP40076.t1	intron
TRSP40076.t1	intron
TRSP40076.t1	intron
TRSP40076.t1	intron
TRSP40076.t1	intron
TRSP40076.t1	intron
TRSP40076.t1	intron
TRSP40076.t1	intron
TRSP40076.t1	intron
TRSP40076.t1	intron
TRSP41206.t1	intron
TRSP41206.t1	intron
TRSP41206.t1	intron
TRSP41207.t1	intron
TRSP41207.t1	intron
TRSP41207.t1	intron
TRSP41207.t1	intron
TRSP41207.t1	intron
TRSP41207.t1	intron
TRSP41207.t1	intron
TRSP41207.t1	intron
TRSP41207.t1	intron
TRSP41207.t1	intron
TRSP41207.t1	intron
TRSP41207.t1	intron
TRSP41207.t1	intron
TRSP41207.t1	intron
TRSP37241.t1	intron
TRSP37241.t1	intron
TRSP37241.t1	intron
TRSP37241.t1	intron
TRSP37241.t1	intron
TRSP37241.t1	intron
TRSP37241.t1	intron
TRSP37241.t1	intron
TRSP37241.t1	intron
TRSP37241.t1	intron
TRSP37241.t1	intron
TRSP37241.t1	intron
TRSP37242.t1	intron
TRSP37242.t1	intron
TRSP37242.t1	intron
TRSP37242.t1	intron
TRSP37242.t1	intron
TRSP37242.t1	intron
TRSP37242.t1	intron
TRSP37242.t1	intron
TRSP37242.t1	intron
TRSP37242.t1	intron
TRSP37242.t1	intron
TRSP37242.t1	intron
TRSP37242.t1	intron
TRSP37242.t1	intron
TRSP37242.t1	intron
TRSP37242.t1	intron
TRSP37242.t1	intron
TRSP37242.t1	intron
TRSP37242.t1	intron
TRSP37242.t1	intron
TRSP37242.t1	intron
TRSP37242.t1	intron
TRSP37242.t1	intron
TRSP37243.t1	intron
TRSP37243.t1	intron
TRSP37243.t1	intron
TRSP37243.t1	intron
TRSP43047.t1	intron
TRSP43047.t1	intron
TRSP43047.t1	intron
TRSP43047.t1	intron
TRSP43047.t1	intron
TRSP43047.t1	intron
TRSP43047.t1	intron
TRSP43047.t1	intron
TRSP43048.t1	intron
TRSP43048.t1	intron
TRSP43048.t1	intron
TRSP43048.t1	intron
TRSP43048.t1	intron
TRSP43048.t1	intron
TRSP43048.t1	intron
TRSP43048.t1	intron
TRSP43049.t1	intron
TRSP43049.t1	intron
TRSP43049.t1	intron
TRSP43049.t1	intron
TRSP43049.t1	intron
TRSP43049.t1	intron
TRSP43049.t1	intron
TRSP43049.t1	intron
TRSP43049.t1	intron
TRSP43049.t1	intron
TRSP43049.t1	intron
TRSP43049.t1	intron
TRSP43049.t1	intron
TRSP43049.t1	intron
TRSP43049.t1	intron
TRSP43049.t1	intron
TRSP43049.t1	intron
TRSP43049.t1	intron
TRSP43049.t1	intron
TRSP10980.t1	intron
TRSP10980.t1	intron
TRSP10980.t1	intron
TRSP10983.t1	intron
TRSP10983.t1	intron
TRSP10983.t1	intron
TRSP10983.t1	intron
TRSP10983.t1	intron
TRSP10983.t1	intron
TRSP10983.t1	intron
TRSP10983.t1	intron
TRSP10983.t1	intron
TRSP10983.t1	intron
TRSP10984.t1	intron
TRSP10984.t1	intron
TRSP10984.t1	intron
TRSP10984.t1	intron
TRSP10984.t1	intron
TRSP10984.t1	intron
TRSP10984.t1	intron
TRSP10984.t1	intron
TRSP10984.t1	intron
TRSP10984.t1	intron
TRSP10984.t1	intron
TRSP10984.t1	intron
TRSP10984.t1	intron
TRSP10984.t1	intron
TRSP10984.t1	intron
TRSP10984.t1	intron
TRSP10984.t1	intron
TRSP10984.t1	intron
TRSP10984.t1	intron
TRSP10984.t1	intron
TRSP10984.t1	intron
TRSP10984.t1	intron
TRSP10984.t1	intron
TRSP1411.t1	intron
TRSP1411.t1	intron
TRSP1411.t1	intron
TRSP1411.t1	intron
TRSP1411.t1	intron
TRSP1411.t1	intron
TRSP1411.t1	intron
TRSP1411.t1	intron
TRSP1411.t1	intron
TRSP1411.t1	intron
TRSP1411.t1	intron
TRSP1411.t1	intron
TRSP1411.t1	intron
TRSP1412.t1	intron
TRSP1412.t1	intron
TRSP1412.t1	intron
TRSP1412.t1	intron
TRSP1412.t1	intron
TRSP1413.t1	intron
TRSP1413.t1	intron
TRSP1413.t1	intron
TRSP1413.t1	intron
TRSP1413.t1	intron
TRSP1413.t1	intron
TRSP1413.t1	intron
TRSP1413.t1	intron
TRSP1413.t1	intron
TRSP1413.t1	intron
TRSP1413.t1	intron
TRSP3275.t1	intron
TRSP3275.t1	intron
TRSP3276.t1	intron
TRSP3276.t1	intron
TRSP3276.t1	intron
TRSP3276.t1	intron
TRSP3276.t1	intron
TRSP3276.t1	intron
TRSP3276.t1	intron
TRSP3276.t1	intron
TRSP3276.t1	intron
TRSP3276.t1	intron
TRSP3276.t1	intron
TRSP3276.t1	intron
TRSP3276.t1	intron
TRSP3276.t1	intron
TRSP3277.t1	intron
TRSP3277.t1	intron
TRSP3277.t1	intron
TRSP3277.t1	intron
TRSP3277.t1	intron
TRSP3279.t1	intron
TRSP3279.t1	intron
TRSP3279.t1	intron
TRSP3279.t1	intron
TRSP3279.t1	intron
TRSP3279.t1	intron
TRSP3280.t1	intron
TRSP3280.t1	intron
TRSP3280.t1	intron
TRSP44696.t1	intron
TRSP44696.t1	intron
TRSP44696.t1	intron
TRSP44696.t1	intron
TRSP44696.t1	intron
TRSP44696.t1	intron
TRSP44696.t1	intron
TRSP44696.t1	intron
TRSP44696.t1	intron
TRSP44696.t1	intron
TRSP44696.t1	intron
TRSP44696.t1	intron
TRSP44696.t1	intron
TRSP44696.t1	intron
TRSP44697.t1	intron
TRSP44697.t1	intron
TRSP44697.t1	intron
TRSP44697.t1	intron
TRSP44698.t1	intron
TRSP44698.t1	intron
TRSP44698.t1	intron
TRSP44698.t1	intron
TRSP44698.t1	intron
TRSP44698.t1	intron
TRSP44698.t1	intron
TRSP44698.t1	intron
TRSP44698.t1	intron
TRSP44698.t1	intron
TRSP44698.t1	intron
TRSP15436.t1	intron
TRSP15436.t1	intron
TRSP15436.t1	intron
TRSP15436.t1	intron
TRSP15436.t1	intron
TRSP15436.t1	intron
TRSP15436.t1	intron
TRSP15436.t1	intron
TRSP15437.t1	intron
TRSP15438.t1	intron
TRSP15438.t1	intron
TRSP15438.t1	intron
TRSP15439.t1	intron
TRSP15440.t1	intron
TRSP15440.t1	intron
TRSP15440.t1	intron
TRSP21921.t1	intron
TRSP21921.t1	intron
TRSP21921.t1	intron
TRSP21921.t1	intron
TRSP21921.t1	intron
TRSP21921.t1	intron
TRSP21921.t1	intron
TRSP21921.t1	intron
TRSP21921.t1	intron
TRSP21921.t1	intron
TRSP21921.t1	intron
TRSP21921.t1	intron
TRSP21921.t1	intron
TRSP21921.t1	intron
TRSP21921.t1	intron
TRSP21922.t1	intron
TRSP21922.t1	intron
TRSP21922.t1	intron
TRSP21922.t1	intron
TRSP21922.t1	intron
TRSP26348.t1	intron
TRSP26348.t1	intron
TRSP26349.t1	intron
TRSP26349.t1	intron
TRSP26349.t1	intron
TRSP26349.t1	intron
TRSP26349.t1	intron
TRSP26349.t1	intron
TRSP26349.t1	intron
TRSP26349.t1	intron
TRSP26349.t1	intron
TRSP26349.t1	intron
TRSP26349.t1	intron
TRSP26349.t1	intron
TRSP26349.t1	intron
TRSP26349.t1	intron
TRSP26349.t1	intron
TRSP26350.t1	intron
TRSP26350.t1	intron
TRSP26350.t1	intron
TRSP26350.t1	intron
TRSP26350.t1	intron
TRSP26350.t1	intron
TRSP26350.t1	intron
TRSP26350.t1	intron
TRSP26350.t1	intron
TRSP26350.t1	intron
TRSP26350.t1	intron
TRSP26350.t1	intron
TRSP26350.t1	intron
TRSP26350.t1	intron
TRSP26350.t1	intron
TRSP26350.t1	intron
TRSP26350.t1	intron
TRSP26350.t1	intron
TRSP26350.t1	intron
TRSP26350.t1	intron
TRSP26350.t1	intron
TRSP26350.t1	intron
TRSP26350.t1	intron
TRSP26350.t1	intron
TRSP26350.t1	intron
TRSP26350.t1	intron
TRSP26351.t1	intron
TRSP26351.t1	intron
TRSP26352.t1	intron
TRSP26352.t1	intron
TRSP26352.t1	intron
TRSP26352.t1	intron
TRSP26352.t1	intron
TRSP26352.t1	intron
TRSP26352.t1	intron
TRSP26352.t1	intron
TRSP26352.t1	intron
TRSP26352.t1	intron
TRSP37615.t1	intron
TRSP37615.t1	intron
TRSP37615.t1	intron
TRSP37615.t1	intron
TRSP37615.t1	intron
TRSP37615.t1	intron
TRSP37615.t1	intron
TRSP37615.t1	intron
TRSP37616.t1	intron
TRSP37617.t1	intron
TRSP37617.t1	intron
TRSP37617.t1	intron
TRSP37617.t1	intron
TRSP37618.t1	intron
TRSP37618.t1	intron
TRSP37618.t1	intron
TRSP37618.t1	intron
TRSP37618.t1	intron
TRSP37618.t1	intron
TRSP37618.t1	intron
TRSP37618.t1	intron
TRSP37618.t1	intron
TRSP2451.t1	intron
TRSP2451.t1	intron
TRSP2451.t1	intron
TRSP2451.t1	intron
TRSP2451.t1	intron
TRSP2451.t1	intron
TRSP2451.t1	intron
TRSP2451.t1	intron
TRSP2451.t1	intron
TRSP2451.t1	intron
TRSP2451.t1	intron
TRSP2451.t1	intron
TRSP2451.t1	intron
TRSP2451.t1	intron
TRSP2451.t1	intron
TRSP2451.t1	intron
TRSP2451.t1	intron
TRSP2451.t1	intron
TRSP2451.t1	intron
TRSP2451.t1	intron
TRSP2451.t1	intron
TRSP2452.t1	intron
TRSP2452.t1	intron
TRSP2452.t1	intron
TRSP2452.t1	intron
TRSP2452.t1	intron
TRSP2452.t1	intron
TRSP2452.t1	intron
TRSP2452.t1	intron
TRSP2452.t1	intron
TRSP2454.t1	intron
TRSP2454.t1	intron
TRSP2454.t1	intron
TRSP2454.t1	intron
TRSP2454.t1	intron
TRSP2454.t1	intron
TRSP2454.t1	intron
TRSP2454.t1	intron
TRSP2455.t1	intron
TRSP2455.t1	intron
TRSP2455.t1	intron
TRSP2455.t1	intron
TRSP2455.t1	intron
TRSP2456.t1	intron
TRSP2456.t1	intron
TRSP2456.t1	intron
TRSP2456.t1	intron
TRSP2456.t1	intron
TRSP2457.t1	intron
TRSP2457.t1	intron
TRSP2457.t1	intron
TRSP2457.t1	intron
TRSP2457.t1	intron
TRSP2457.t1	intron
TRSP44718.t1	intron
TRSP44718.t1	intron
TRSP44718.t1	intron
TRSP44718.t1	intron
TRSP44718.t1	intron
TRSP44718.t1	intron
TRSP44718.t1	intron
TRSP44718.t1	intron
TRSP44718.t1	intron
TRSP44718.t1	intron
TRSP44718.t1	intron
TRSP44718.t1	intron
TRSP44718.t1	intron
TRSP44719.t1	intron
TRSP44719.t1	intron
TRSP44719.t1	intron
TRSP44719.t1	intron
TRSP44719.t1	intron
TRSP44719.t1	intron
TRSP44719.t1	intron
TRSP44719.t1	intron
TRSP44720.t1	intron
TRSP44720.t1	intron
TRSP44721.t1	intron
TRSP8791.t1	intron
TRSP8791.t1	intron
TRSP8791.t1	intron
TRSP8791.t1	intron
TRSP8791.t1	intron
TRSP8791.t1	intron
TRSP8791.t1	intron
TRSP8791.t1	intron
TRSP8792.t1	intron
TRSP8792.t1	intron
TRSP8792.t1	intron
TRSP8792.t1	intron
TRSP8792.t1	intron
TRSP8792.t1	intron
TRSP8792.t1	intron
TRSP8792.t1	intron
TRSP8792.t1	intron
TRSP8792.t1	intron
TRSP8792.t1	intron
TRSP8793.t1	intron
TRSP8793.t1	intron
TRSP8793.t1	intron
TRSP8793.t1	intron
TRSP8793.t1	intron
TRSP8793.t1	intron
TRSP8793.t1	intron
TRSP8794.t1	intron
TRSP8794.t1	intron
TRSP8795.t1	intron
TRSP8795.t1	intron
TRSP8795.t1	intron
TRSP8795.t1	intron
TRSP8795.t1	intron
TRSP8795.t1	intron
TRSP8795.t1	intron
TRSP8796.t1	intron
TRSP8796.t1	intron
TRSP8796.t1	intron
TRSP8796.t1	intron
TRSP8796.t1	intron
TRSP8796.t1	intron
TRSP8796.t1	intron
TRSP8796.t1	intron
TRSP8796.t1	intron
TRSP8796.t1	intron
TRSP8796.t1	intron
TRSP35835.t1	intron
TRSP35835.t1	intron
TRSP35835.t1	intron
TRSP35835.t1	intron
TRSP35835.t1	intron
TRSP35835.t1	intron
TRSP35836.t1	intron
TRSP35836.t1	intron
TRSP35836.t1	intron
TRSP35836.t1	intron
TRSP35836.t1	intron
TRSP35837.t1	intron
TRSP35837.t1	intron
TRSP35837.t1	intron
TRSP35837.t1	intron
TRSP35837.t1	intron
TRSP35837.t1	intron
TRSP35837.t1	intron
TRSP35837.t1	intron
TRSP35837.t1	intron
TRSP35838.t1	intron
TRSP35838.t1	intron
TRSP35838.t1	intron
TRSP37425.t1	intron
TRSP37426.t1	intron
TRSP37427.t1	intron
TRSP37427.t1	intron
TRSP37427.t1	intron
TRSP37427.t1	intron
TRSP37428.t1	intron
TRSP37428.t1	intron
TRSP37428.t1	intron
TRSP37428.t1	intron
TRSP37428.t1	intron
TRSP37428.t1	intron
TRSP44685.t1	intron
TRSP44685.t1	intron
TRSP41878.t1	intron
TRSP41878.t1	intron
TRSP41878.t1	intron
TRSP41878.t1	intron
TRSP41878.t1	intron
TRSP41880.t1	intron
TRSP41880.t1	intron
TRSP41880.t1	intron
TRSP41880.t1	intron
TRSP41880.t1	intron
TRSP41880.t1	intron
TRSP41880.t1	intron
TRSP41880.t1	intron
TRSP41880.t1	intron
TRSP41881.t1	intron
TRSP41881.t1	intron
TRSP41881.t1	intron
TRSP41881.t1	intron
TRSP41881.t1	intron
TRSP41881.t1	intron
TRSP41881.t1	intron
TRSP41882.t1	intron
TRSP41882.t1	intron
TRSP41882.t1	intron
TRSP41882.t1	intron
TRSP41883.t1	intron
TRSP41883.t1	intron
TRSP41883.t1	intron
TRSP41883.t1	intron
TRSP41884.t1	intron
TRSP139.t1	intron
TRSP139.t1	intron
TRSP141.t1	intron
TRSP141.t1	intron
TRSP141.t1	intron
TRSP141.t1	intron
TRSP141.t1	intron
TRSP141.t1	intron
TRSP142.t1	intron
TRSP142.t1	intron
TRSP5295.t1	intron
TRSP5296.t1	intron
TRSP5297.t1	intron
TRSP5297.t1	intron
TRSP5297.t1	intron
TRSP5297.t1	intron
TRSP5297.t1	intron
TRSP5297.t1	intron
TRSP5297.t1	intron
TRSP5297.t1	intron
TRSP5297.t1	intron
TRSP5297.t1	intron
TRSP5297.t1	intron
TRSP5297.t1	intron
TRSP5297.t1	intron
TRSP5297.t1	intron
TRSP5297.t1	intron
TRSP5297.t1	intron
TRSP5297.t1	intron
TRSP5297.t1	intron
TRSP5297.t1	intron
TRSP5297.t1	intron
TRSP5297.t1	intron
TRSP5298.t1	intron
TRSP5298.t1	intron
TRSP5298.t1	intron
TRSP5298.t1	intron
TRSP5298.t1	intron
TRSP761.t1	intron
TRSP761.t1	intron
TRSP761.t1	intron
TRSP764.t1	intron
TRSP764.t1	intron
TRSP764.t1	intron
TRSP764.t1	intron
TRSP764.t1	intron
TRSP764.t1	intron
TRSP764.t1	intron
TRSP764.t1	intron
TRSP765.t1	intron
TRSP765.t1	intron
TRSP765.t1	intron
TRSP765.t1	intron
TRSP765.t1	intron
TRSP765.t1	intron
TRSP765.t1	intron
TRSP765.t1	intron
TRSP765.t1	intron
TRSP765.t1	intron
TRSP765.t1	intron
TRSP765.t1	intron
TRSP765.t1	intron
TRSP765.t1	intron
TRSP765.t1	intron
TRSP765.t1	intron
TRSP765.t1	intron
TRSP765.t1	intron
TRSP765.t1	intron
TRSP765.t1	intron
TRSP765.t1	intron
TRSP765.t1	intron
TRSP765.t1	intron
TRSP765.t1	intron
TRSP766.t1	intron
TRSP766.t1	intron
TRSP766.t1	intron
TRSP766.t1	intron
TRSP766.t1	intron
TRSP766.t1	intron
TRSP3818.t1	intron
TRSP3819.t1	intron
TRSP3819.t1	intron
TRSP3819.t1	intron
TRSP3819.t1	intron
TRSP3819.t1	intron
TRSP3819.t1	intron
TRSP3819.t1	intron
TRSP3819.t1	intron
TRSP3819.t1	intron
TRSP3819.t1	intron
TRSP3819.t1	intron
TRSP3820.t1	intron
TRSP3820.t1	intron
TRSP3820.t1	intron
TRSP3820.t1	intron
TRSP3821.t1	intron
TRSP3821.t1	intron
TRSP3821.t1	intron
TRSP3821.t1	intron
TRSP3821.t1	intron
TRSP3821.t1	intron
TRSP3822.t1	intron
TRSP3822.t1	intron
TRSP3822.t1	intron
TRSP3822.t1	intron
TRSP3822.t1	intron
TRSP3822.t1	intron
TRSP35680.t1	intron
TRSP35680.t1	intron
TRSP35680.t1	intron
TRSP35680.t1	intron
TRSP35680.t1	intron
TRSP35680.t1	intron
TRSP35680.t1	intron
TRSP35680.t1	intron
TRSP35680.t1	intron
TRSP35680.t1	intron
TRSP35680.t1	intron
TRSP35680.t1	intron
TRSP35680.t1	intron
TRSP35681.t1	intron
TRSP35681.t1	intron
TRSP35681.t1	intron
TRSP35681.t1	intron
TRSP35681.t1	intron
TRSP35681.t1	intron
TRSP35681.t1	intron
TRSP35681.t1	intron
TRSP35681.t1	intron
TRSP35681.t1	intron
TRSP35681.t1	intron
TRSP35681.t1	intron
TRSP35681.t1	intron
TRSP35681.t1	intron
TRSP35681.t1	intron
TRSP35681.t1	intron
TRSP35681.t1	intron
TRSP35681.t1	intron
TRSP35682.t1	intron
TRSP35682.t1	intron
TRSP35682.t1	intron
TRSP35682.t1	intron
TRSP35682.t1	intron
TRSP35682.t1	intron
TRSP35683.t1	intron
TRSP35683.t1	intron
TRSP35683.t1	intron
TRSP35683.t1	intron
TRSP35683.t1	intron
TRSP35683.t1	intron
TRSP35683.t1	intron
TRSP35686.t1	intron
TRSP4564.t1	intron
TRSP4566.t1	intron
TRSP4567.t1	intron
TRSP4568.t1	intron
TRSP4568.t1	intron
TRSP4568.t1	intron
TRSP4568.t1	intron
TRSP4568.t1	intron
TRSP4568.t1	intron
TRSP36506.t1	intron
TRSP36506.t1	intron
TRSP36506.t1	intron
TRSP36506.t1	intron
TRSP36506.t1	intron
TRSP36506.t1	intron
TRSP36506.t1	intron
TRSP36506.t1	intron
TRSP36506.t1	intron
TRSP36506.t1	intron
TRSP36506.t1	intron
TRSP36506.t1	intron
TRSP36506.t1	intron
TRSP36506.t1	intron
TRSP36507.t1	intron
TRSP36507.t1	intron
TRSP36507.t1	intron
TRSP36508.t1	intron
TRSP36508.t1	intron
TRSP36509.t1	intron
TRSP36509.t1	intron
TRSP36509.t1	intron
TRSP36509.t1	intron
TRSP36509.t1	intron
TRSP36509.t1	intron
TRSP36509.t1	intron
TRSP36509.t1	intron
TRSP36509.t1	intron
TRSP36510.t1	intron
TRSP36510.t1	intron
TRSP36510.t1	intron
TRSP36510.t1	intron
TRSP36510.t1	intron
TRSP112.t1	intron
TRSP112.t1	intron
TRSP112.t1	intron
TRSP112.t1	intron
TRSP112.t1	intron
TRSP112.t1	intron
TRSP112.t1	intron
TRSP112.t1	intron
TRSP113.t1	intron
TRSP114.t1	intron
TRSP114.t1	intron
TRSP114.t1	intron
TRSP114.t1	intron
TRSP114.t1	intron
TRSP114.t1	intron
TRSP114.t1	intron
TRSP114.t1	intron
TRSP114.t1	intron
TRSP114.t1	intron
TRSP114.t1	intron
TRSP114.t1	intron
TRSP114.t1	intron
TRSP114.t1	intron
TRSP114.t1	intron
TRSP114.t1	intron
TRSP114.t1	intron
TRSP114.t1	intron
TRSP114.t1	intron
TRSP114.t1	intron
TRSP114.t1	intron
TRSP115.t1	intron
TRSP116.t1	intron
TRSP11190.t1	intron
TRSP11190.t1	intron
TRSP11190.t1	intron
TRSP11190.t1	intron
TRSP11190.t1	intron
TRSP11190.t1	intron
TRSP11190.t1	intron
TRSP11190.t1	intron
TRSP11190.t1	intron
TRSP11190.t1	intron
TRSP11190.t1	intron
TRSP11190.t1	intron
TRSP11190.t1	intron
TRSP11190.t1	intron
TRSP11190.t1	intron
TRSP11190.t1	intron
TRSP11190.t1	intron
TRSP11190.t1	intron
TRSP11190.t1	intron
TRSP11190.t1	intron
TRSP11190.t1	intron
TRSP11190.t1	intron
TRSP11190.t1	intron
TRSP11192.t1	intron
TRSP11192.t1	intron
TRSP11192.t1	intron
TRSP11192.t1	intron
TRSP40030.t1	intron
TRSP40030.t1	intron
TRSP40030.t1	intron
TRSP40030.t1	intron
TRSP40031.t1	intron
TRSP40032.t1	intron
TRSP40032.t1	intron
TRSP40032.t1	intron
TRSP40032.t1	intron
TRSP40032.t1	intron
TRSP40032.t1	intron
TRSP40032.t1	intron
TRSP40032.t1	intron
TRSP40032.t1	intron
TRSP40037.t1	intron
TRSP40037.t1	intron
TRSP40037.t1	intron
TRSP40037.t1	intron
TRSP32037.t1	intron
TRSP32037.t1	intron
TRSP32038.t1	intron
TRSP32038.t1	intron
TRSP32039.t1	intron
TRSP32039.t1	intron
TRSP32039.t1	intron
TRSP32039.t1	intron
TRSP32039.t1	intron
TRSP32039.t1	intron
TRSP32039.t1	intron
TRSP32039.t1	intron
TRSP32039.t1	intron
TRSP32040.t1	intron
TRSP32040.t1	intron
TRSP32040.t1	intron
TRSP32040.t1	intron
TRSP32040.t1	intron
TRSP32040.t1	intron
TRSP32040.t1	intron
TRSP32040.t1	intron
TRSP32041.t1	intron
TRSP32041.t1	intron
TRSP32042.t1	intron
TRSP32042.t1	intron
TRSP32042.t1	intron
TRSP32042.t1	intron
TRSP32042.t1	intron
TRSP32042.t1	intron
TRSP36922.t1	intron
TRSP36922.t1	intron
TRSP36922.t1	intron
TRSP36922.t1	intron
TRSP36922.t1	intron
TRSP36922.t1	intron
TRSP36922.t1	intron
TRSP36922.t1	intron
TRSP36922.t1	intron
TRSP36922.t1	intron
TRSP36922.t1	intron
TRSP36922.t1	intron
TRSP36922.t1	intron
TRSP36922.t1	intron
TRSP36922.t1	intron
TRSP36923.t1	intron
TRSP36923.t1	intron
TRSP36923.t1	intron
TRSP36923.t1	intron
TRSP36923.t1	intron
TRSP36923.t1	intron
TRSP36923.t1	intron
TRSP36923.t1	intron
TRSP36923.t1	intron
TRSP36923.t1	intron
TRSP36923.t1	intron
TRSP36923.t1	intron
TRSP36924.t1	intron
TRSP36924.t1	intron
TRSP36924.t1	intron
TRSP36924.t1	intron
TRSP36924.t1	intron
TRSP36924.t1	intron
TRSP36924.t1	intron
TRSP36924.t1	intron
TRSP36924.t1	intron
TRSP36924.t1	intron
TRSP36924.t1	intron
TRSP36925.t1	intron
TRSP36925.t1	intron
TRSP36925.t1	intron
TRSP36925.t1	intron
TRSP36925.t1	intron
TRSP36926.t1	intron
TRSP36926.t1	intron
TRSP36926.t1	intron
TRSP38889.t1	intron
TRSP38889.t1	intron
TRSP38889.t1	intron
TRSP38889.t1	intron
TRSP38889.t1	intron
TRSP38889.t1	intron
TRSP38889.t1	intron
TRSP38889.t1	intron
TRSP38889.t1	intron
TRSP38889.t1	intron
TRSP38889.t1	intron
TRSP38889.t1	intron
TRSP38889.t1	intron
TRSP38889.t1	intron
TRSP38889.t1	intron
TRSP38891.t1	intron
TRSP38892.t1	intron
TRSP38892.t1	intron
TRSP38892.t1	intron
TRSP38892.t1	intron
TRSP38893.t1	intron
TRSP38893.t1	intron
TRSP38893.t1	intron
TRSP38893.t1	intron
TRSP38893.t1	intron
TRSP38893.t1	intron
TRSP38893.t1	intron
TRSP38893.t1	intron
TRSP38893.t1	intron
TRSP38893.t1	intron
TRSP38893.t1	intron
TRSP38893.t1	intron
TRSP38893.t1	intron
TRSP38893.t1	intron
TRSP38893.t1	intron
TRSP38893.t1	intron
TRSP38893.t1	intron
TRSP38894.t1	intron
TRSP38894.t1	intron
TRSP11798.t1	intron
TRSP11798.t1	intron
TRSP11798.t1	intron
TRSP11798.t1	intron
TRSP11798.t1	intron
TRSP11798.t1	intron
TRSP11798.t1	intron
TRSP11798.t1	intron
TRSP11799.t1	intron
TRSP11799.t1	intron
TRSP11799.t1	intron
TRSP11800.t1	intron
TRSP11800.t1	intron
TRSP11800.t1	intron
TRSP11800.t1	intron
TRSP11802.t1	intron
TRSP11803.t1	intron
TRSP11803.t1	intron
TRSP11803.t1	intron
TRSP11803.t1	intron
TRSP43331.t1	intron
TRSP43331.t1	intron
TRSP43332.t1	intron
TRSP43332.t1	intron
TRSP43332.t1	intron
TRSP43332.t1	intron
TRSP43332.t1	intron
TRSP43332.t1	intron
TRSP43332.t1	intron
TRSP43333.t1	intron
TRSP43333.t1	intron
TRSP43333.t1	intron
TRSP43333.t1	intron
TRSP43333.t1	intron
TRSP43333.t1	intron
TRSP43333.t1	intron
TRSP43333.t1	intron
TRSP43333.t1	intron
TRSP43333.t1	intron
TRSP43334.t1	intron
TRSP43334.t1	intron
TRSP43334.t1	intron
TRSP43334.t1	intron
TRSP43334.t1	intron
TRSP43334.t1	intron
TRSP43334.t1	intron
TRSP43334.t1	intron
TRSP43334.t1	intron
TRSP43334.t1	intron
TRSP43335.t1	intron
TRSP43335.t1	intron
TRSP43335.t1	intron
TRSP43335.t1	intron
TRSP43335.t1	intron
TRSP43335.t1	intron
TRSP42357.t1	intron
TRSP42357.t1	intron
TRSP42357.t1	intron
TRSP42357.t1	intron
TRSP42357.t1	intron
TRSP42357.t1	intron
TRSP42357.t1	intron
TRSP42357.t1	intron
TRSP42357.t1	intron
TRSP42357.t1	intron
TRSP42357.t1	intron
TRSP42357.t1	intron
TRSP42357.t1	intron
TRSP42357.t1	intron
TRSP42357.t1	intron
TRSP42358.t1	intron
TRSP42358.t1	intron
TRSP42358.t1	intron
TRSP42358.t1	intron
TRSP42358.t1	intron
TRSP42358.t1	intron
TRSP42358.t1	intron
TRSP42358.t1	intron
TRSP42358.t1	intron
TRSP42358.t1	intron
TRSP42358.t1	intron
TRSP42358.t1	intron
TRSP42358.t1	intron
TRSP42358.t1	intron
TRSP42358.t1	intron
TRSP42358.t1	intron
TRSP42358.t1	intron
TRSP42358.t1	intron
TRSP42359.t1	intron
TRSP42359.t1	intron
TRSP42360.t1	intron
TRSP42360.t1	intron
TRSP42360.t1	intron
TRSP42360.t1	intron
TRSP42360.t1	intron
TRSP42362.t1	intron
TRSP42362.t1	intron
TRSP42362.t1	intron
TRSP42362.t1	intron
TRSP84.t1	intron
TRSP84.t1	intron
TRSP85.t1	intron
TRSP85.t1	intron
TRSP85.t1	intron
TRSP85.t1	intron
TRSP85.t1	intron
TRSP85.t1	intron
TRSP85.t1	intron
TRSP85.t1	intron
TRSP85.t1	intron
TRSP85.t1	intron
TRSP85.t1	intron
TRSP85.t1	intron
TRSP85.t1	intron
TRSP85.t1	intron
TRSP85.t1	intron
TRSP85.t1	intron
TRSP85.t1	intron
TRSP85.t1	intron
TRSP85.t1	intron
TRSP85.t1	intron
TRSP85.t1	intron
TRSP85.t1	intron
TRSP85.t1	intron
TRSP85.t1	intron
TRSP85.t1	intron
TRSP85.t1	intron
TRSP85.t1	intron
TRSP85.t1	intron
TRSP85.t1	intron
TRSP85.t1	intron
TRSP85.t1	intron
TRSP21458.t1	intron
TRSP21458.t1	intron
TRSP21458.t1	intron
TRSP21458.t1	intron
TRSP21458.t1	intron
TRSP21458.t1	intron
TRSP21458.t1	intron
TRSP21458.t1	intron
TRSP21458.t1	intron
TRSP21458.t1	intron
TRSP21458.t1	intron
TRSP21458.t1	intron
TRSP21458.t1	intron
TRSP21458.t1	intron
TRSP21458.t1	intron
TRSP21458.t1	intron
TRSP21458.t1	intron
TRSP21458.t1	intron
TRSP21458.t1	intron
TRSP21458.t1	intron
TRSP21458.t1	intron
TRSP21458.t1	intron
TRSP21458.t1	intron
TRSP21458.t1	intron
TRSP21458.t1	intron
TRSP21458.t1	intron
TRSP21458.t1	intron
TRSP21458.t1	intron
TRSP21458.t1	intron
TRSP21458.t1	intron
TRSP21458.t1	intron
TRSP21458.t1	intron
TRSP21458.t1	intron
TRSP21458.t1	intron
TRSP21458.t1	intron
TRSP21458.t1	intron
TRSP21458.t1	intron
TRSP21458.t1	intron
TRSP21458.t1	intron
TRSP21458.t1	intron
TRSP21458.t1	intron
TRSP21458.t1	intron
TRSP21458.t1	intron
TRSP21458.t1	intron
TRSP21458.t1	intron
TRSP21458.t1	intron
TRSP21458.t1	intron
TRSP21458.t1	intron
TRSP2873.t1	intron
TRSP2874.t1	intron
TRSP2874.t1	intron
TRSP2874.t1	intron
TRSP2874.t1	intron
TRSP2874.t1	intron
TRSP2874.t1	intron
TRSP2874.t1	intron
TRSP2874.t1	intron
TRSP2874.t1	intron
TRSP2874.t1	intron
TRSP2874.t1	intron
TRSP2874.t1	intron
TRSP2874.t1	intron
TRSP2874.t1	intron
TRSP2874.t1	intron
TRSP30907.t1	intron
TRSP30908.t1	intron
TRSP30908.t1	intron
TRSP30908.t1	intron
TRSP30908.t1	intron
TRSP30908.t1	intron
TRSP30908.t1	intron
TRSP30908.t1	intron
TRSP30908.t1	intron
TRSP30908.t1	intron
TRSP30908.t1	intron
TRSP30908.t1	intron
TRSP30908.t1	intron
TRSP30908.t1	intron
TRSP30908.t1	intron
TRSP30908.t1	intron
TRSP30909.t1	intron
TRSP30910.t1	intron
TRSP30911.t1	intron
TRSP30912.t1	intron
TRSP30912.t1	intron
TRSP30913.t1	intron
TRSP30913.t1	intron
TRSP30913.t1	intron
TRSP30913.t1	intron
TRSP30913.t1	intron
TRSP30913.t1	intron
TRSP30914.t1	intron
TRSP30914.t1	intron
TRSP30914.t1	intron
TRSP30914.t1	intron
TRSP30914.t1	intron
TRSP30914.t1	intron
TRSP30914.t1	intron
TRSP30914.t1	intron
TRSP30914.t1	intron
TRSP30915.t1	intron
TRSP30915.t1	intron
TRSP30915.t1	intron
TRSP30915.t1	intron
TRSP30915.t1	intron
TRSP30915.t1	intron
TRSP30915.t1	intron
TRSP34802.t1	intron
TRSP34802.t1	intron
TRSP34803.t1	intron
TRSP34803.t1	intron
TRSP34803.t1	intron
TRSP34803.t1	intron
TRSP34803.t1	intron
TRSP34803.t1	intron
TRSP34803.t1	intron
TRSP34803.t1	intron
TRSP34803.t1	intron
TRSP34803.t1	intron
TRSP34803.t1	intron
TRSP34803.t1	intron
TRSP34803.t1	intron
TRSP34803.t1	intron
TRSP34803.t1	intron
TRSP34803.t1	intron
TRSP34803.t1	intron
TRSP34803.t1	intron
TRSP34803.t1	intron
TRSP34803.t1	intron
TRSP34803.t1	intron
TRSP34803.t1	intron
TRSP34804.t1	intron
TRSP34804.t1	intron
TRSP34804.t1	intron
TRSP34804.t1	intron
TRSP34804.t1	intron
TRSP34804.t1	intron
TRSP34804.t1	intron
TRSP34804.t1	intron
TRSP34804.t1	intron
TRSP34804.t1	intron
TRSP34804.t1	intron
TRSP34805.t1	intron
TRSP34805.t1	intron
TRSP34806.t1	intron
TRSP34806.t1	intron
TRSP34806.t1	intron
TRSP34806.t1	intron
TRSP34806.t1	intron
TRSP34806.t1	intron
TRSP34806.t1	intron
TRSP34806.t1	intron
TRSP34806.t1	intron
TRSP34806.t1	intron
TRSP34806.t1	intron
TRSP34806.t1	intron
TRSP34806.t1	intron
TRSP34806.t1	intron
TRSP34806.t1	intron
TRSP34807.t1	intron
TRSP34807.t1	intron
TRSP34807.t1	intron
TRSP34807.t1	intron
TRSP34807.t1	intron
TRSP34807.t1	intron
TRSP34807.t1	intron
TRSP34808.t1	intron
TRSP34808.t1	intron
TRSP34808.t1	intron
TRSP34808.t1	intron
TRSP41794.t1	intron
TRSP41794.t1	intron
TRSP41794.t1	intron
TRSP41794.t1	intron
TRSP41794.t1	intron
TRSP41794.t1	intron
TRSP41794.t1	intron
TRSP41794.t1	intron
TRSP41794.t1	intron
TRSP41794.t1	intron
TRSP41794.t1	intron
TRSP41794.t1	intron
TRSP41794.t1	intron
TRSP41794.t1	intron
TRSP41794.t1	intron
TRSP41794.t1	intron
TRSP41795.t1	intron
TRSP41795.t1	intron
TRSP41795.t1	intron
TRSP41796.t1	intron
TRSP41796.t1	intron
TRSP41796.t1	intron
TRSP41797.t1	intron
TRSP41798.t1	intron
TRSP38491.t1	intron
TRSP38491.t1	intron
TRSP38492.t1	intron
TRSP38492.t1	intron
TRSP38492.t1	intron
TRSP38492.t1	intron
TRSP38492.t1	intron
TRSP38492.t1	intron
TRSP38492.t1	intron
TRSP38492.t1	intron
TRSP38492.t1	intron
TRSP38492.t1	intron
TRSP38492.t1	intron
TRSP38492.t1	intron
TRSP38492.t1	intron
TRSP38492.t1	intron
TRSP38492.t1	intron
TRSP38492.t1	intron
TRSP38492.t1	intron
TRSP38493.t1	intron
TRSP38493.t1	intron
TRSP38493.t1	intron
TRSP38493.t1	intron
TRSP38493.t1	intron
TRSP38493.t2	intron
TRSP38493.t2	intron
TRSP38493.t2	intron
TRSP38493.t2	intron
TRSP38493.t2	intron
TRSP38494.t1	intron
TRSP38494.t1	intron
TRSP38494.t1	intron
TRSP38494.t1	intron
TRSP38494.t1	intron
TRSP38494.t1	intron
TRSP38494.t1	intron
TRSP38495.t1	intron
TRSP38495.t1	intron
TRSP38495.t1	intron
TRSP38495.t1	intron
TRSP38495.t2	intron
TRSP38495.t2	intron
TRSP38495.t2	intron
TRSP38495.t2	intron
TRSP37619.t1	intron
TRSP37619.t1	intron
TRSP37619.t1	intron
TRSP37619.t1	intron
TRSP37619.t1	intron
TRSP37619.t1	intron
TRSP37619.t1	intron
TRSP37619.t1	intron
TRSP37619.t1	intron
TRSP37619.t1	intron
TRSP37619.t1	intron
TRSP37619.t1	intron
TRSP37619.t1	intron
TRSP37620.t1	intron
TRSP37620.t1	intron
TRSP37622.t1	intron
TRSP37622.t1	intron
TRSP37622.t1	intron
TRSP37623.t1	intron
TRSP37624.t1	intron
TRSP31659.t1	intron
TRSP31659.t1	intron
TRSP31659.t1	intron
TRSP31659.t1	intron
TRSP31659.t1	intron
TRSP31659.t1	intron
TRSP31660.t1	intron
TRSP31660.t1	intron
TRSP31660.t1	intron
TRSP31660.t1	intron
TRSP31660.t1	intron
TRSP31660.t1	intron
TRSP31660.t1	intron
TRSP31660.t1	intron
TRSP31661.t1	intron
TRSP31661.t1	intron
TRSP31661.t1	intron
TRSP31662.t1	intron
TRSP31662.t1	intron
TRSP31662.t1	intron
TRSP31662.t1	intron
TRSP31662.t1	intron
TRSP31663.t1	intron
TRSP31663.t1	intron
TRSP31663.t1	intron
TRSP31663.t1	intron
TRSP31664.t1	intron
TRSP31664.t1	intron
TRSP31664.t1	intron
TRSP31664.t1	intron
TRSP31664.t1	intron
TRSP31664.t1	intron
TRSP31664.t1	intron
TRSP31664.t1	intron
TRSP31664.t1	intron
TRSP31664.t1	intron
TRSP31664.t1	intron
TRSP31664.t1	intron
TRSP31664.t1	intron
TRSP31028.t1	intron
TRSP31028.t1	intron
TRSP31028.t1	intron
TRSP31028.t1	intron
TRSP31028.t1	intron
TRSP31028.t1	intron
TRSP31028.t1	intron
TRSP31028.t1	intron
TRSP31029.t1	intron
TRSP31029.t1	intron
TRSP31029.t1	intron
TRSP31029.t1	intron
TRSP31029.t1	intron
TRSP31029.t1	intron
TRSP31029.t1	intron
TRSP31029.t1	intron
TRSP31030.t1	intron
TRSP31030.t1	intron
TRSP31030.t1	intron
TRSP31030.t1	intron
TRSP31030.t1	intron
TRSP31030.t1	intron
TRSP31030.t1	intron
TRSP31030.t1	intron
TRSP31030.t1	intron
TRSP31030.t1	intron
TRSP31031.t1	intron
TRSP31031.t1	intron
TRSP31031.t1	intron
TRSP31031.t1	intron
TRSP31031.t1	intron
TRSP31034.t1	intron
TRSP31034.t1	intron
TRSP31034.t1	intron
TRSP31034.t1	intron
TRSP31034.t1	intron
TRSP31034.t1	intron
TRSP6810.t1	intron
TRSP6810.t1	intron
TRSP6811.t1	intron
TRSP6811.t1	intron
TRSP6811.t1	intron
TRSP6811.t1	intron
TRSP6811.t1	intron
TRSP6811.t1	intron
TRSP6812.t1	intron
TRSP6812.t1	intron
TRSP6813.t1	intron
TRSP6813.t1	intron
TRSP6813.t1	intron
TRSP6813.t1	intron
TRSP6813.t1	intron
TRSP6813.t1	intron
TRSP6813.t1	intron
TRSP6813.t1	intron
TRSP6813.t1	intron
TRSP6813.t1	intron
TRSP6813.t1	intron
TRSP6813.t1	intron
TRSP6815.t1	intron
TRSP6815.t1	intron
TRSP6815.t1	intron
[truncated: 208,564+ more rows]

## Sheet: Sheet4
TRSP7649.t1	0
TRSP6335.t1	0
TRSP6324.t1	11
TRSP6252.t1	27
TRSP5304.t1	0
TRSP44688.t1	0
TRSP44123.t1	10
TRSP42621.t1	5
TRSP4169.t1	13
TRSP40647.t1	10
TRSP4040.t1	0
TRSP39439.t1	12
TRSP38786.t1	0
TRSP37947.t1	16
TRSP36451.t1	5
TRSP35770.t1	13
TRSP35218.t1	0
TRSP35044.t1	0
TRSP33088.t1	0
TRSP32553.t1	9
TRSP30619.t1	3
TRSP30096.t1	5
TRSP29050.t1	6
TRSP28612.t1	7
TRSP25490.t1	0
TRSP2280.t1	0
TRSP21941.t1	7
TRSP21069.t1	7
TRSP17525.t1	24
TRSP1607.t1	0
TRSP15538.t1	8
TRSP1487.t1	0
TRSP14135.t1	13
TRSP12223.t1	9
TRSP10682.t1	24
TRSP9936.t1	8
TRSP9850.t1	44
TRSP9779.t1	10
TRSP9665.t1	0
TRSP9661.t1	0
TRSP9601.t1	0
TRSP9598.t1	0
TRSP9567.t1	0
TRSP9564.t1	0
TRSP8477.t1	0
TRSP8163.t1	17
TRSP8159.t1	10
TRSP7763.t1	12
TRSP7686.t1	0
TRSP7410.t1	2
TRSP7283.t1	0
TRSP7269.t1	0
TRSP7235.t1	0
TRSP7189.t1	0
TRSP7182.t1	0
TRSP6933.t1	10
TRSP6844.t1	0
TRSP6842.t1	0
TRSP6821.t1	0
TRSP6394.t1	1
TRSP5939.t1	0
TRSP5860.t1	0
TRSP5517.t1	0
TRSP5271.t1	5
TRSP4951.t1	8
TRSP4927.t2	44
TRSP4893.t2	0
TRSP4893.t1	0
TRSP4890.t1	0
TRSP4640.t1	0
TRSP4543.t1	0
TRSP4542.t1	0
TRSP44925.t1	0
TRSP44924.t1	0
TRSP44758.t1	9
TRSP44570.t1	3
TRSP44566.t2	11
TRSP44482.t1	17
TRSP44391.t1	12
TRSP44240.t1	0
TRSP4392.t1	10
TRSP43872.t1	0
TRSP43715.t1	0
TRSP43714.t1	0
TRSP43678.t1	0
TRSP43433.t1	0
TRSP43416.t1	5
TRSP43391.t1	0
TRSP43390.t1	0
TRSP43286.t1	0
TRSP43285.t1	0
TRSP43279.t1	0
TRSP43075.t1	0
TRSP43066.t1	0
TRSP43034.t1	0
TRSP43033.t1	0
TRSP43030.t1	0
TRSP42782.t1	0
TRSP4276.t1	0
TRSP4273.t1	0
TRSP4272.t1	0
TRSP4271.t1	0
TRSP4270.t1	0
TRSP4269.t1	0
TRSP4267.t1	0
TRSP42536.t1	7
TRSP42087.t1	0
TRSP42006.t1	4
TRSP41876.t1	0
TRSP41801.t1	0
TRSP41800.t1	0
TRSP41709.t1	23
TRSP41449.t1	21
TRSP41396.t1	0
TRSP41395.t1	0
TRSP41133.t1	0
TRSP40884.t1	0
TRSP40832.t1	0
TRSP40831.t1	0
TRSP40829.t1	0
TRSP40631.t1	5
TRSP40549.t1	0
TRSP40548.t1	0
TRSP40354.t1	10
TRSP40341.t1	19
TRSP40075.t1	2
TRSP40062.t1	0
TRSP39964.t1	1
TRSP39937.t1	0
TRSP39936.t1	0
TRSP39737.t1	0
TRSP39434.t1	8
TRSP39164.t1	0
TRSP39163.t1	0
TRSP39133.t1	0
TRSP3880.t1	7
TRSP3878.t1	7
TRSP38389.t1	0
TRSP38197.t1	13
TRSP37731.t1	0
TRSP37730.t1	0
TRSP37728.t1	0
TRSP37722.t1	0
TRSP37635.t1	0
TRSP37237.t1	0
TRSP36938.t1	0
TRSP36877.t1	0
TRSP36854.t1	0
TRSP36853.t1	0
TRSP36852.t1	0
TRSP36851.t1	0
TRSP36849.t1	0
TRSP36848.t1	0
TRSP36801.t1	11
TRSP36787.t1	11
TRSP36757.t1	5
TRSP3666.t1	17
TRSP36656.t1	13
TRSP3665.t1	9
TRSP36629.t1	0
TRSP3657.t1	17
TRSP36493.t1	0
TRSP36331.t1	8
TRSP36180.t1	0
TRSP36170.t1	0
TRSP35573.t1	0
TRSP35572.t1	0
TRSP3550.t1	4
TRSP35417.t1	11
TRSP35376.t1	0
TRSP35357.t1	0
TRSP35226.t1	0
TRSP35047.t1	0
TRSP35046.t1	0
TRSP35045.t1	0
TRSP3499.t1	11
TRSP34855.t1	0
TRSP34693.t1	0
TRSP34688.t1	0
TRSP34684.t1	0
TRSP34523.t1	14
TRSP34437.t1	0
TRSP34431.t1	0
TRSP34400.t1	0
TRSP34370.t1	1
TRSP34339.t1	6
TRSP34225.t1	2
TRSP34209.t1	11
TRSP33668.t1	0
TRSP33598.t1	12
TRSP33531.t1	7
TRSP33305.t1	10
TRSP33190.t1	0
TRSP32906.t1	4
TRSP32751.t1	13
TRSP32737.t1	0
TRSP32583.t1	23
TRSP32434.t1	0
TRSP32433.t1	0
TRSP3239.t1	9
TRSP32307.t1	0
TRSP32138.t1	0
TRSP32023.t1	0
TRSP31880.t1	14
TRSP31651.t1	0
TRSP31648.t1	0
TRSP31646.t1	0
TRSP31614.t1	8
TRSP31231.t2	0
TRSP31231.t1	0
TRSP31003.t1	0
TRSP30788.t1	0
TRSP30662.t1	0
TRSP30661.t1	0
TRSP30608.t1	11
TRSP3052.t1	0
TRSP30413.t1	5
TRSP3040.t1	0
TRSP30350.t1	0
TRSP30325.t1	4
TRSP30212.t1	9
TRSP29706.t1	1
TRSP2967.t1	0
TRSP29639.t1	5
TRSP29596.t1	12
TRSP29569.t1	18
TRSP29553.t1	19
TRSP29305.t1	3
TRSP2915.t1	0
TRSP28872.t1	0
TRSP28862.t1	0
TRSP28798.t1	0
TRSP28718.t1	1
TRSP28481.t1	29
TRSP28448.t1	8
TRSP28346.t1	10
TRSP28103.t1	0
TRSP27951.t1	9
TRSP27823.t1	3
TRSP27759.t1	9
TRSP27715.t1	11
TRSP27695.t1	14
TRSP27694.t1	10
TRSP27671.t1	3
TRSP27647.t1	0
TRSP27646.t1	0
TRSP27428.t1	0
TRSP27334.t1	2
TRSP27103.t1	10
TRSP26767.t1	0
TRSP2674.t1	0
TRSP2673.t1	0
TRSP2672.t1	0
TRSP26624.t1	0
TRSP26489.t1	4
TRSP26484.t1	8
TRSP26407.t1	7
TRSP26281.t1	8
TRSP26259.t1	3
TRSP26207.t1	2
TRSP26188.t1	6
TRSP26169.t1	7
TRSP26050.t1	0
TRSP26007.t1	0
TRSP2600.t1	11
TRSP25973.t1	7
TRSP25943.t1	1
TRSP25925.t1	8
TRSP25914.t1	3
TRSP2577.t1	17
TRSP25733.t1	0
TRSP25602.t1	3
TRSP25545.t1	14
TRSP25343.t1	7
TRSP25148.t1	6
TRSP25141.t1	18
TRSP24757.t1	0
TRSP24670.t1	0
TRSP24590.t1	5
TRSP24348.t1	0
TRSP24329.t1	0
TRSP24231.t1	0
TRSP24027.t1	0
TRSP23860.t1	1
TRSP23764.t1	0
TRSP23619.t1	5
TRSP23607.t1	5
TRSP23588.t1	10
TRSP23576.t1	7
TRSP23464.t1	0
TRSP23461.t1	0
TRSP23191.t1	5
TRSP23181.t1	5
TRSP22995.t1	6
TRSP22845.t1	4
TRSP22796.t1	47
TRSP22641.t1	2
TRSP22627.t1	0
TRSP22626.t1	0
TRSP22625.t1	0
TRSP22624.t1	0
TRSP22623.t1	0
TRSP22622.t1	0
TRSP22621.t1	0
TRSP2242.t1	0
TRSP22405.t1	7
TRSP22404.t1	18
TRSP22297.t1	5
TRSP22095.t1	4
TRSP22066.t1	24
TRSP21858.t1	0
TRSP21706.t1	0
TRSP21701.t1	3
TRSP21700.t1	11
TRSP21478.t1	0
TRSP21439.t1	0
TRSP21344.t1	3
TRSP21314.t1	14
TRSP21224.t1	4
TRSP21207.t1	12
TRSP21124.t1	0
TRSP21123.t1	0
TRSP21122.t1	0
TRSP21098.t1	5
TRSP20757.t1	5
TRSP20731.t1	5
TRSP20730.t1	8
TRSP20693.t1	5
TRSP20408.t1	1
TRSP2032.t1	0
TRSP20241.t1	0
TRSP20240.t1	0
TRSP20155.t1	5
TRSP20065.t1	17
TRSP19940.t1	18
TRSP19901.t1	5
TRSP19859.t1	0
TRSP19839.t1	26
TRSP19813.t1	21
TRSP19735.t1	125
TRSP19290.t1	11
TRSP191.t1	0
TRSP18955.t1	12
TRSP18906.t1	0
TRSP18859.t1	8
TRSP18654.t1	10
TRSP18575.t1	48
TRSP18479.t1	0
TRSP18420.t1	7
TRSP18389.t1	5
TRSP18381.t1	10
TRSP18375.t1	1
TRSP18275.t1	0
TRSP18265.t1	0
TRSP18143.t1	14
TRSP18039.t1	1
TRSP17501.t1	10
TRSP17443.t1	4
TRSP17439.t1	7
TRSP17318.t1	5
TRSP17315.t1	9
TRSP17272.t1	7
TRSP17247.t1	10
TRSP17231.t1	5
TRSP17224.t1	6
TRSP17163.t1	0
TRSP1708.t1	6
TRSP16926.t1	11
TRSP16889.t1	8
TRSP16706.t1	22
TRSP16651.t1	0
TRSP16616.t1	3
TRSP16604.t1	6
TRSP16581.t1	5
TRSP16548.t1	4
TRSP16386.t1	2
TRSP15594.t1	0
TRSP15196.t1	8
TRSP1509.t1	0
TRSP15078.t1	0
TRSP15076.t1	0
TRSP1506.t1	0
TRSP14848.t1	0
TRSP1474.t1	0
TRSP14669.t1	0
TRSP14651.t1	0
TRSP14373.t1	3
TRSP1434.t1	0
TRSP14307.t1	48
TRSP14277.t1	9
TRSP14275.t1	1
TRSP14157.t1	6
TRSP14033.t1	6
TRSP13995.t1	15
TRSP13822.t1	9
TRSP13819.t1	5
TRSP13542.t1	2
TRSP13461.t1	4
TRSP13369.t1	4
TRSP13289.t1	2
TRSP13231.t2	12
TRSP13231.t1	2
TRSP12962.t1	11
TRSP12733.t1	7
TRSP12561.t1	14
TRSP12541.t1	12
TRSP12521.t1	12
TRSP12520.t1	12
TRSP12434.t1	29
TRSP12293.t1	13
TRSP12287.t1	10
TRSP12112.t1	8
TRSP11959.t2	19
TRSP11935.t1	0
TRSP11897.t1	19
TRSP11822.t1	0
TRSP1179.t1	0
TRSP1178.t1	0
TRSP1177.t1	0
TRSP11763.t1	9
TRSP1176.t1	0
TRSP1149.t1	17
TRSP11473.t1	5
TRSP11311.t1	3
TRSP11127.t1	16
TRSP11016.t1	7
TRSP10605.t1	18
TRSP10561.t1	5
TRSP10527.t1	0
TRSP10525.t1	0
TRSP10066.t1	6
